# Supplementary material for: Metabolomic Changes in Plasma of Preterminal Stage of Rhesus Nonhuman Primates Exposed to Lethal Dose of Radiation
Source: Preprints.org preprint supplement (doi:10.20944/preprints202311.1433.v1), 2023-11-22
Supplement: Supplementary file 2 [file 2023-11-16 Supplementary Tables.xlsx]

## Sheet: Supp. Table 1
Supplementary Table 1. Unpaired statistical summary comparing day (d) 1, d 13, and d 25 samples to pre-irradiation or preterminal samples.
			d 1 vs. Pre-irradiation				d 13 vs. Pre-irradiation				d 25 vs. Pre-irradiation				d -7 vs Preterminal				d 1 vs Preterminal				d 13 vs Preterminal				d 25 vs Preterminal
mode	mz	rt	p.value	FDR	Fold Change	log2(FC)	p.value	FDR	Fold Change	log2(FC)	p.value	FDR	Fold Change	log2(FC)	p.value	FDR	Fold Change	log2(FC)	p.value	FDR	Fold Change	log2(FC)	p.value	FDR	Fold Change	log2(FC)	p.value	FDR	Fold Change	log2(FC)
NEG	192.022	0.38	1.0566e-06	0.00069378	0.36308	-1.4616	0.12087	0.42718	0.72078	-0.47237	0.0031052	0.029491	0.75827	-0.39921	0.014239	0.067769	0.57931	-0.78758	0.12729	0.30607	1.5956	0.67407	0.64403	0.82818	0.80374	-0.31521	0.11807	0.32074	0.76399	-0.38837
QueryMZ	MetlinMass	Adducts	MID	Common_name	Annotation
192.022	193.074	M-H	4237	Phenylacetylglycine	Endogenous;Food;Microbial Metabolites
192.022	193.038	M-H	6110	5,6-Dihydroxyindole-2-carboxylic acid	Endogenous;Food
192.022	193.038	M-H	6241	L-Dopachrome	Endogenous;Food
192.022	193.038	M-H	62387	D-Dopachrome	Endogenous;Food
192.022	193.074	M-H	24085	2-Methylhippuric acid	Endogenous;Food
192.022	193.074	M-H	34510	3-Methylhippuric acid	Endogenous;Food
192.022	193.074	M-H	64936	4-Methylhippuric acid	Endogenous;Food
192.022	193.074	M-H	71245	3-Carbamoyl-2-phenylpropionaldehyde	Drug Metabolite;Endogenous;Microbial Metabolites
192.022	193.074	M-H	71252	4-Hydroxy-5-phenyltetrahydro-1,3-oxazin-2-one	Drug Metabolite;Endogenous;Microbial Metabolites
192.022	193.038	M-H	6241	L-Dopachrome	Endogenous;Food
NEG	111.009	0.38	1.2606e-06	0.00069378	0.37571	-1.4123	0.10002	0.38467	0.7113	-0.49147	0.0014716	0.019856	0.77002	-0.37704	0.017389	0.078881	0.61474	-0.70195	0.093482	0.2555	1.6362	0.71035	0.74594	0.88554	0.86425	-0.21048	0.15338	0.37625	0.79835	-0.32491
QueryMZ	MetlinMass	Adducts	MID	Common_name	Annotation
111.0089	112.027	M-H	258	Uracil	Carcinogenic Potency;Cosmetic;Drug;Endogenous;Food;Microbial Metabolites;Plant;TCM Ingredients
111.0089	112.016	M-H	5433	3-Furoic acid	Endogenous;Food;TCM Ingredients
111.0089	112.016	M-H	2266	2-Furoic acid	Endogenous;Food;Plant;TCM Ingredients
111.0089	112.052	M-H	6046	trans-1,2-Dihydrobenzene-1,2-diol	Endogenous;Food
111.0089	112.052	M-H	34778	Sorbic acid	Agricultural Chemicals;Endogenous;Food;Microbial Metabolites;TCM Ingredients;Toxins/Pollutant
111.0089	111.998	M-H	86442	2-Thiophenecarboxaldehyde	Endogenous;Food
111.0089	112.052	M-H	66348	Cyclohexane-1,2-dione	Endogenous;Food
111.0089	112.052	M-H	46415	4-oxo-2E-Hexenal	Endogenous;Food;Plant
111.0089	112.052	M-H	88282	2,5-Dimethyl-3(2H)-furanone	Endogenous;Food
NEG	191.02	0.38	1.3991e-06	0.00069378	0.35761	-1.4836	0.10725	0.4001	0.71245	-0.48914	0.0041583	0.034851	0.77704	-0.36394	0.018579	0.082037	0.612	-0.70839	0.069364	0.2076	1.7114	0.77517	0.7488	0.88708	0.85901	-0.21925	0.14323	0.36188	0.78761	-0.34444
QueryMZ	MetlinMass	Adducts	MID	Common_name	Annotation
191.0196	192.027	M-H	124	Citric acid	Agricultural Chemicals;Carcinogenic Potency;Cosmetic;Drug;Endogenous;Food;Microbial Metabolites;Plant;TCM Ingredients
191.0196	192.027	M-H	124	Citric acid	Agricultural Chemicals;Carcinogenic Potency;Drug;Endogenous;Food;Microbial Metabolites;Plant;TCM Ingredients
191.0196	192.027	M-H	3328	Isocitrate	Endogenous;Food;Microbial Metabolites;Plant;TCM Ingredients
191.0196	192.027	M-H	6364	threo-Isocitric acid	Endogenous;Food;Plant;TCM Ingredients
191.0196	192.027	M-H	351	2,3-Dioxogulonic acid	Endogenous;Food;Microbial Metabolites
191.0196	192.027	M-H	45874	diketo-gulonic acid	Endogenous;Food;Microbial Metabolites
191.0196	192.027	M-H	58437	2,3-Diketo-L-gulonate	Endogenous;Food;Microbial Metabolites
191.0196	192.027	M-H	58437	2,3-Diketo-L-gulonate	Endogenous;Food;Microbial Metabolites
191.0196	192.057	M-H	85600	Alanyl-Cysteine	Endogenous
191.0196	192.057	M-H	85682	Cysteinyl-Alanine	Endogenous
191.0196	192.075	M-H	85941	Serinyl-Serine	Endogenous
191.0196	192.042	M-H	87142	8-Hydroxy-7-methoxy-2H-1-benzopyran-2-one	Endogenous;Food;Plant;TCM Ingredients
191.0196	192.039	M-H	87478	N-Nitrosothialdine	Endogenous;Food
191.0196	192.027	M-H	44758	Glucaric acid lactone	Endogenous
191.0196	192.042	M-H	43957	6,7-dihydroxy-4-methyl-2H-chromen-2-one	Endogenous;TCM Ingredients
191.0196	192.042	M-H	43957	4-METHYLESCULETIN	Endogenous;TCM Ingredients
191.0196	192.042	M-H	43740	7,8-dihydroxy-4-methyl-2H-chromen-2-one	Endogenous
191.0196	192.042	M-H	43740	4-METHYLDAPHNETIN	Endogenous
191.0196	192.042	M-H	44270	5,7-dihydroxy-4-methyl-2H-chromen-2-one	Endogenous;TCM Ingredients
191.0196	192.042	M-H	44270	5,7-DIHYDROXY-4-METHYLCOUMARIN	Endogenous;TCM Ingredients
191.0196	192.027	M-H	6364	threo-Isocitric acid	Endogenous;Food;Plant;TCM Ingredients
191.0196	192.027	M-H	351	2,3-Dioxogulonic acid	Endogenous;Microbial Metabolites
191.0196	192.027	M-H	45874	diketo-gulonic acid	Endogenous;Microbial Metabolites
NEG	112.016	0.38	1.6324e-06	0.00069378	0.39714	-1.3323	0.0084755	0.12981	0.61101	-0.71073	0.00041169	0.0077765	0.67741	-0.5619	0.29779	0.50963	0.8564	-0.22365	0.016353	0.084704	2.1564	1.1086	0.33813	0.5801	1.4016	0.48707	0.54002	0.77466	1.2642	0.33825
QueryMZ	MetlinMass	Adducts	MID	Common_name	Annotation
112.0162	113.059	M-H	8	Creatinine	Cosmetic;Endogenous;Food;TCM Ingredients
112.0162	113.048	M-H	3240	1-Pyrroline-5-carboxylic acid	Endogenous;Food;Microbial Metabolites;Plant;TCM Ingredients;Toxins/Pollutant
112.0162	113.048	M-H	58576	1-Pyrroline-2-carboxylic acid	Drug;Endogenous;Food
NEG	129.018	0.38	3.3176e-06	0.001128	0.49806	-1.0056	0.12814	0.44277	0.78631	-0.34683	0.049326	0.16846	0.83521	-0.25978	0.044545	0.15484	0.73593	-0.44236	0.035617	0.13254	1.4776	0.56324	0.8593	0.94003	0.93593	-0.095528	0.31296	0.58287	0.88113	-0.18258
QueryMZ	MetlinMass	Adducts	MID	Common_name	Annotation
129.018	130.063	M-H	5397	2-Methyl-3-ketovaleric acid	Endogenous;Food
129.018	130.063	M-H	122	3-Methyl-2-oxovaleric acid	Endogenous;Food;Microbial Metabolites;Toxins/Pollutant
129.018	130.063	M-H	7072	(R)-3-methyl-2-oxo-Pentanoic acid	Endogenous;Food;Microbial Metabolites;Toxins/Pollutant
129.018	130.027	M-H	5593	Glutaconic acid	Endogenous;Food;Toxins/Pollutant
129.018	130.027	M-H	5607	Citraconic acid	Drug;Endogenous;Food;Microbial Metabolites
129.018	130.063	M-H	121	Ketoleucine	Drug;Endogenous;Food;Microbial Metabolites;Plant;TCM Ingredients;Toxins/Pollutant
129.018	130.027	M-H	4130	Mesaconic acid	Drug;Endogenous;Food;TCM Ingredients
129.018	130.063	M-H	74708	2-keto-n-caproic acid	Endogenous;Food
129.018	130.027	M-H	44764	Itaconic acid	Endogenous;Food;Microbial Metabolites;Plant;TCM Ingredients
129.018	130.063	M-H	44780	(&plusmn;)-Mevalonolactone	Cosmetic;Endogenous;Food
129.018	130.063	M-H	35703	3-keto-n-caproic acid	Endogenous;Food
129.018	130.018	M-H	570	Fluorouracil	Carcinogenic Potency;Cosmetic;Drug;Drug Metabolite;Endogenous;TCM Ingredients;Toxins/Pollutant
129.018	130.074	M-H	86241	L-cis-3-Amino-2-pyrrolidinecarboxylic acid	Endogenous;Food;Plant
129.018	130.074	M-H	86950	D-1-Amino-2-pyrrolidinecarboxylic acid	Endogenous;Food
129.018	130.063	M-H	87499	5-Ethoxy-4,5-dihydro-2(3H)furanone	Endogenous;Food;TCM Ingredients
129.018	130.063	M-H	87501	Ethyl acetoacetate	Endogenous;Food;Plant
129.018	130.045	M-H	87623	2-[(Methylthio)methyl]-2-butenal	Endogenous;Food;Microbial Metabolites;Plant
129.018	129.991	M-H	87973	2-Thiophenemethanethiol	Endogenous;Food
129.018	130.027	M-H	89545	Methyl hydrogen fumarate	Endogenous;Food
129.018	130.063	M-H	122	3-Methyl-2-oxovaleric acid	Endogenous;Food;Microbial Metabolites;Toxins/Pollutant
129.018	130.063	M-H	35705	5-keto-n-caproic acid	Endogenous;Food
129.018	130.027	M-H	5593	Glutaconic acid	Endogenous;Food;Toxins/Pollutant
129.018	130.063	M-H	7072	(R)-3-methyl-2-oxo-Pentanoic acid	Endogenous;Food;Microbial Metabolites;Toxins/Pollutant
129.018	130.063	M-H	44780	(&plusmn;)-Mevalonolactone	Cosmetic;Endogenous;Food
NEG	833.517	12.16	5.1407e-06	0.001417	0.42268	-1.2424	0.15002	0.48012	0.81869	-0.28861	0.21916	0.46122	0.82147	-0.28373	0.054812	0.17954	0.71493	-0.48413	0.010624	0.067269	1.6914	0.75824	0.48589	0.7066	0.87325	-0.19553	0.68248	0.85011	0.8703	-0.20041
QueryMZ	MetlinMass	Adducts	MID	Common_name	Annotation
833.5174	834.526	M-H	61169	PI(16:0/18:2(9Z,12Z))	Endogenous;Food;Microbial Metabolites
833.5174	834.526	M-H	61185	PI(16:1(9Z)/18:1(11Z))	Endogenous;Food;Microbial Metabolites
833.5174	834.526	M-H	61186	PI(16:1(9Z)/18:1(9Z))	Endogenous;Food;Microbial Metabolites
833.5174	834.526	M-H	61188	PI(16:2(9Z,12Z)/18:0)	Endogenous;Food;Microbial Metabolites
833.5174	834.526	M-H	61192	PI(18:0/16:2(9Z,12Z))	Endogenous;Food;Microbial Metabolites
833.5174	834.526	M-H	61208	PI(18:1(11Z)/16:1(9Z))	Endogenous;Food;Microbial Metabolites
833.5174	834.526	M-H	61220	PI(18:1(9Z)/16:1(9Z))	Endogenous;Food;Microbial Metabolites
833.5174	834.526	M-H	61231	PI(18:2(9Z,12Z)/16:0)	Endogenous;Food;Microbial Metabolites
833.5174	834.498	M-H	87923	Notoginsenoside J	Endogenous;Food
833.5174	834.498	M-H	87923	Notoginsenoside J	Endogenous;Food
NEG	622.332	5.63	5.8345e-06	0.001417	0.44712	-1.1613	0.0065015	0.12002	0.60667	-0.72103	3.0299e-06	0.0015252	0.44278	-1.1753	0.00028139	0.0043886	0.19694	-2.3442	0.009135	0.064438	0.44045	-1.1829	0.0048757	0.052543	0.32462	-1.6232	0.0090524	0.074343	0.44477	-1.1689
QueryMZ	MetlinMass	Adducts	MID	Common_name	Annotation
NEG	173.002	0.36	9.2856e-06	0.0019732	0.4407	-1.1821	0.21355	0.55734	0.80773	-0.30805	0.19547	0.43044	0.86231	-0.21371	0.097673	0.26149	0.7295	-0.45502	0.040405	0.14192	1.6553	0.72711	0.70337	0.85838	0.90315	-0.14697	0.22245	0.47329	0.84598	-0.24131
QueryMZ	MetlinMass	Adducts	MID	Common_name	Annotation
173.002	174.016	M-H	3771	trans-Aconitate	Endogenous;Food;Microbial Metabolites;Plant;TCM Ingredients
173.002	174.016	M-H	3300	Aconitic acid	Endogenous;Food;Microbial Metabolites;Plant;TCM Ingredients
173.002	174.016	M-H	3300	Aconitic acid	Endogenous;Food;Microbial Metabolites;Plant;TCM Ingredients
173.002	174.016	M-H	3771	trans-Aconitate	Endogenous;Food;Microbial Metabolites;Plant;TCM Ingredients
173.002	174.016	M-H	342	Dehydroascorbic acid	Endogenous;Food;Microbial Metabolites;Plant;TCM Ingredients
173.002	174.053	M-H	338	Shikimic acid	Endogenous;Food;Microbial Metabolites;Plant;TCM Ingredients
173.002	174.032	M-H	87072	1-Oxo-1H-2-benzopyran-3-carboxaldehyde	Endogenous;Food;Plant;TCM Ingredients
173.002	174.032	M-H	44061	JUGLONE	Drug;Endogenous;Food;Plant;TCM Ingredients
173.002	173.999	M-H	1828	Phenyl sulfate	Endogenous;Microbial Metabolites
173.002	174.016	M-H	342	Dehydroascorbic acid	Endogenous;Food;Microbial Metabolites;Plant;TCM Ingredients
NEG	555.349	5.63	1.0704e-05	0.0020219	0.43586	-1.1981	0.0067071	0.12002	0.58245	-0.7798	3.4258e-06	0.0015252	0.40126	-1.3174	0.00054703	0.0074396	0.16534	-2.5965	0.0094539	0.06487	0.37933	-1.3985	0.0058313	0.057725	0.28387	-1.8167	0.012931	0.08764	0.41205	-1.2791
QueryMZ	MetlinMass	Adducts	MID	Common_name	Annotation
555.3486	556.376	M-H	91577	3beta,15alpha-Diacetoxylanosta-8,24-dien-26-oic acid	Endogenous;Food;TCM Ingredients
555.3486	556.376	M-H	91577	3beta,15alpha-Diacetoxylanosta-8,24-dien-26-oic acid	Endogenous;Food;TCM Ingredients
NEG	544.317	5.64	1.3947e-05	0.002371	0.47664	-1.069	0.025255	0.21278	0.6579	-0.60405	3.2105e-05	0.0022015	0.43917	-1.1872	0.000265	0.0042103	0.24753	-2.0143	0.010857	0.067738	0.51933	-0.94528	0.0074472	0.068434	0.37625	-1.4103	0.025496	0.12786	0.56364	-0.82715
QueryMZ	MetlinMass	Adducts	MID	Common_name	Annotation
544.3175	545.348	M-H	61703	LysoPC(20:3(5Z,8Z,11Z))	Endogenous;Food;Microbial Metabolites
544.3175	545.348	M-H	61704	LysoPC(20:3(8Z,11Z,14Z))	Endogenous;Food;Microbial Metabolites
544.3175	545.348	M-H	76575	PC(20:3(8Z,11Z,14Z)/0:0)	Endogenous;Food;Microbial Metabolites
544.3175	545.348	M-H	61704	LysoPC(20:3(8Z,11Z,14Z))	Endogenous;Food;Microbial Metabolites
NEG	85.0296	0.38	1.7989e-05	0.0026239	0.47719	-1.0674	0.083596	0.35176	0.75242	-0.41039	0.16943	0.39349	0.85708	-0.22251	0.10758	0.27667	0.77174	-0.37381	0.037944	0.13666	1.6173	0.69356	0.89171	0.9552	1.0257	0.036582	0.47202	0.73483	0.90043	-0.15131
QueryMZ	MetlinMass	Adducts	MID	Common_name	Annotation
85.0296	86.0368	M-H	5533	4-Deoxytetronic acid	Cosmetic;Drug;Endogenous;Food;Microbial Metabolites;Plant;TCM Ingredients;Toxins/Pollutant
85.0296	86.0368	M-H	6710	Oxolan-3-one	Endogenous;Food
85.0296	86.0368	M-H	6921	Diacetyl	Cosmetic;Endogenous;Food;Microbial Metabolites;TCM Ingredients;Toxins/Pollutant
85.0296	86.0368	M-H	34861	Crotonic acid	Cosmetic;Drug;Endogenous;Food;TCM Ingredients
85.0296	86.0732	M-H	46060	3-Methyl-2-buten-1-ol	Cosmetic;Endogenous;Food;Plant;TCM Ingredients
85.0296	86.0732	M-H	46061	3-Methyl-3-buten-1-ol	Cosmetic;Endogenous;Food;Plant;TCM Ingredients
85.0296	86.0732	M-H	46535	Pentanal	Cosmetic;Drug;Endogenous;Food;Plant;TCM Ingredients
85.0296	86.0368	M-H	73020	Vinyl acetate	Carcinogenic Potency;Cosmetic;Endogenous;Food;Toxins/Pollutant
85.0296	86.0732	M-H	87737	(S)-2-Methylbutanal	Endogenous;Food;Plant;TCM Ingredients
85.0296	86.0732	M-H	65731	2-Methylbutanal	Cosmetic;Endogenous;Food;Microbial Metabolites;TCM Ingredients
85.0296	86.0732	M-H	46063	2Z-Penten-1-ol	Endogenous;Food;Plant;TCM Ingredients
85.0296	86.0732	M-H	87801	1-Penten-3-ol	Cosmetic;Endogenous;Food;TCM Ingredients
85.0296	86.0368	M-H	34860	Isocrotonic acid	Endogenous;Food
NEG	494.324	5.63	1.8815e-05	0.0026239	0.46023	-1.1196	0.011458	0.15199	0.58427	-0.7753	2.0695e-05	0.0022015	0.43422	-1.2035	0.00046624	0.0066051	0.17179	-2.5413	0.0061195	0.053349	0.37327	-1.4217	0.006042	0.058895	0.29403	-1.766	0.0085914	0.07257	0.39564	-1.3378
QueryMZ	MetlinMass	Adducts	MID	Common_name	Annotation
494.3243	495.332	M-H	182	PC(16:0/0:0)[U] / PC(16:0/0:0)[rac]	Endogenous;Food;Microbial Metabolites
494.3243	495.332	M-H	40284	PC(16:0/0:0)	Endogenous;Food;Microbial Metabolites
494.3243	495.332	M-H	40286	PC(16:0/0:0)[U]	Endogenous;Food;Microbial Metabolites
494.3243	495.332	M-H	61692	LysoPC(16:0)	Endogenous;Food;Microbial Metabolites
494.3243	495.332	M-H	182	PC(16:0/0:0)[U] / PC(16:0/0:0)[rac]	Endogenous;Food;Microbial Metabolites
494.3243	495.332	M-H	40284	PC(16:0/0:0)	Endogenous;Food;Microbial Metabolites
494.3243	495.332	M-H	40286	PC(16:0/0:0)[U]	Endogenous;Food;Microbial Metabolites
NEG	583.379	6.28	2.0065e-05	0.0026239	0.35047	-1.5126	0.066246	0.307	0.6434	-0.6362	0.0001767	0.0045513	0.42055	-1.2496	0.00035258	0.0053022	0.19638	-2.3483	0.04775	0.15925	0.56033	-0.83565	0.016939	0.096664	0.30522	-1.7121	0.022456	0.11782	0.46695	-1.0986
QueryMZ	MetlinMass	Adducts	MID	Common_name	Annotation
583.3788	584.423	M-H	86551	Cryptochrome	Endogenous;Food;Plant;TCM Ingredients
583.3788	584.423	M-H	86574	Cryptoxanthin diepoxide	Endogenous;Food;Plant;TCM Ingredients
583.3788	584.423	M-H	87050	Cryptoxanthin 5,6:5',8'-diepoxide	Endogenous;Food
583.3788	584.423	M-H	87078	(3S,3'R,4xi)-beta,beta-Carotene-3,3',4-triol	Endogenous;Food
583.3788	584.429	M-H	89185	Antibiotic X 14889A	Endogenous;Food
583.3788	584.423	M-H	91054	Antheraxanthin A	Endogenous;Food;TCM Ingredients
583.3788	584.423	M-H	91908	Triphasiaxanthin	Endogenous;Food;Plant;TCM Ingredients
583.3788	584.423	M-H	92091	Prenigroxanthin	Endogenous;Food;TCM Ingredients
583.3788	584.423	M-H	92421	Mutatoxanthin	Endogenous;Food;TCM Ingredients
583.3788	584.423	M-H	41492	Lutein 5,6-epoxide	Endogenous;Food;Plant;TCM Ingredients
583.3788	584.423	M-H	86551	Cryptochrome	Endogenous;Food;Plant;TCM Ingredients
583.3788	584.423	M-H	86574	Cryptoxanthin diepoxide	Endogenous;Food;Plant;TCM Ingredients
583.3788	584.423	M-H	87050	Cryptoxanthin 5,6:5',8'-diepoxide	Endogenous;Food
583.3788	584.423	M-H	87078	(3S,3'R,4xi)-beta,beta-Carotene-3,3',4-triol	Endogenous;Food
583.3788	584.429	M-H	89185	Antibiotic X 14889A	Endogenous;Food
583.3788	584.423	M-H	91054	Antheraxanthin A	Endogenous;Food;TCM Ingredients
583.3788	584.423	M-H	91908	Triphasiaxanthin	Endogenous;Food;Plant;TCM Ingredients
583.3788	584.423	M-H	92421	Mutatoxanthin	Endogenous;Food;TCM Ingredients
NEG	597.394	6.62	3.2941e-05	0.0038985	0.4192	-1.2543	0.063809	0.29995	0.61421	-0.70321	0.002272	0.025578	0.51598	-0.9546	0.00010453	0.002141	0.26687	-1.9058	0.0070499	0.057095	0.63662	-0.65149	0.056943	0.20422	0.4345	-1.2026	0.009179	0.075021	0.51721	-0.95117
QueryMZ	MetlinMass	Adducts	MID	Common_name	Annotation
597.3942	598.439	M-H	86719	(8'R)-Neochrome	Endogenous;Food;TCM Ingredients
597.3942	598.402	M-H	91912	Isomytiloxanthin	Endogenous;Food;Plant;TCM Ingredients
597.3942	598.423	M-H	93736	Hericenone D	Endogenous;Food;TCM Ingredients
597.3942	598.402	M-H	95134	Idoxanthin	Endogenous;Food;Plant
597.3942	598.439	M-H	86719	(8'R)-Neochrome	Endogenous;Food;TCM Ingredients
597.3942	598.402	M-H	91912	Isomytiloxanthin	Endogenous;Food;Plant;TCM Ingredients
597.3942	598.402	M-H	95134	Idoxanthin	Endogenous;Food;Plant
NEG	592.266	5.08	3.4414e-05	0.0038985	1.9215	0.9422	0.99598	0.99833	1.0116	0.016616	0.048137	0.16693	1.3247	0.40568	0.76791	0.87249	1.1112	0.15206	0.012813	0.074285	0.57829	-0.79014	0.79143	0.90662	1.0984	0.13544	0.34313	0.61209	0.83879	-0.25362
QueryMZ	MetlinMass	Adducts	MID	Common_name	Annotation
NEG	942.549	8.34	3.8716e-05	0.0038985	0.46776	-1.0961	0.050845	0.27327	0.68171	-0.55277	2.3875e-05	0.0022015	0.45637	-1.1317	0.0006871	0.008692	0.3226	-1.6322	0.10169	0.26926	0.68967	-0.53602	0.049205	0.18304	0.47323	-1.0794	0.11619	0.31859	0.70689	-0.50045
QueryMZ	MetlinMass	Adducts	MID	Common_name	Annotation
NEG	554.345	5.63	4.0707e-05	0.0038985	0.45887	-1.1238	0.0076799	0.12412	0.58417	-0.77555	7.7552e-06	0.0021834	0.40852	-1.2915	0.00055661	0.0074507	0.15303	-2.7081	0.0069546	0.057095	0.3335	-1.5843	0.0050123	0.053256	0.26196	-1.9326	0.010275	0.079322	0.3746	-1.4166
QueryMZ	MetlinMass	Adducts	MID	Common_name	Annotation
NEG	525.281	5.09	4.2345e-05	0.0038985	2.259	1.1757	0.17693	0.5155	1.1466	0.19738	0.0084211	0.051977	1.3549	0.43816	0.51453	0.69261	1.1901	0.25113	0.010315	0.066677	0.52684	-0.92458	0.94836	0.97297	1.038	0.053749	0.35715	0.62594	0.87841	-0.18703
QueryMZ	MetlinMass	Adducts	MID	Common_name	Annotation
525.2809	526.257	M-H	88914	Ganosporeric acid A	Endogenous;Food
525.2809	526.329	M-H	90682	(24E)-3alpha-Acetoxy-15alpha-hydroxy-23-oxo-7,9(11),24-lanostatrien-26-oic acid	Endogenous;Food;TCM Ingredients
525.2809	526.329	M-H	90683	(24E)-15alpha-Acetoxy-3alpha-hydroxy-23-oxo-7,9(11),24-lanostatrien-26-oic acid	Endogenous;Food;TCM Ingredients
525.2809	526.257	M-H	92302	Withangulatin A	Endogenous;Food;Plant;TCM Ingredients
525.2809	526.257	M-H	92908	Absintholide	Endogenous;Food;Plant;TCM Ingredients
525.2809	526.329	M-H	90682	(24E)-3alpha-Acetoxy-15alpha-hydroxy-23-oxo-7,9(11),24-lanostatrien-26-oic acid	Endogenous;Food;TCM Ingredients
525.2809	526.329	M-H	90683	(24E)-15alpha-Acetoxy-3alpha-hydroxy-23-oxo-7,9(11),24-lanostatrien-26-oic acid	Endogenous;Food;TCM Ingredients
525.2809	526.257	M-H	92908	Absintholide	Endogenous;Food;Plant;TCM Ingredients
NEG	582.377	6.28	4.3571e-05	0.0038985	0.31591	-1.6624	0.057304	0.28904	0.56612	-0.82083	0.0002467	0.0055855	0.35589	-1.4905	0.00078689	0.0096356	0.16038	-2.6404	0.047776	0.15925	0.50769	-0.97797	0.03232	0.14016	0.28331	-1.8196	0.039099	0.15661	0.45065	-1.1499
QueryMZ	MetlinMass	Adducts	MID	Common_name	Annotation
NEG	857.517	12.16	6.1241e-05	0.0052055	0.47173	-1.084	0.71405	0.89513	0.95641	-0.064298	0.26428	0.50996	0.82136	-0.28391	0.20258	0.40973	0.7873	-0.34501	0.0080885	0.061386	1.669	0.73895	0.42505	0.65492	0.82319	-0.28071	0.97541	0.99453	0.95853	-0.061098
QueryMZ	MetlinMass	Adducts	MID	Common_name	Annotation
857.5172	858.526	M-H	61174	PI(16:0/20:4(5Z,8Z,11Z,14Z))	Endogenous;Food;Microbial Metabolites
857.5172	858.526	M-H	61175	PI(16:0/20:4(8Z,11Z,14Z,17Z))	Endogenous;Food;Microbial Metabolites
857.5172	858.526	M-H	61212	PI(18:1(11Z)/18:3(6Z,9Z,12Z))	Endogenous;Food;Microbial Metabolites
857.5172	858.526	M-H	61213	PI(18:1(11Z)/18:3(9Z,12Z,15Z))	Endogenous;Food;Microbial Metabolites
857.5172	858.526	M-H	61224	PI(18:1(9Z)/18:3(6Z,9Z,12Z))	Endogenous;Food;Microbial Metabolites
857.5172	858.526	M-H	61225	PI(18:1(9Z)/18:3(9Z,12Z,15Z))	Endogenous;Food;Microbial Metabolites
857.5172	858.526	M-H	61235	PI(18:2(9Z,12Z)/18:2(9Z,12Z))	Endogenous;Food;Microbial Metabolites
857.5172	858.526	M-H	61244	PI(18:3(6Z,9Z,12Z)/18:1(11Z))	Endogenous;Food;Microbial Metabolites
857.5172	858.526	M-H	61245	PI(18:3(6Z,9Z,12Z)/18:1(9Z))	Endogenous;Food;Microbial Metabolites
857.5172	858.526	M-H	61248	PI(18:3(9Z,12Z,15Z)/18:1(11Z))	Endogenous;Food;Microbial Metabolites
857.5172	858.526	M-H	61249	PI(18:3(9Z,12Z,15Z)/18:1(9Z))	Endogenous;Food;Microbial Metabolites
857.5172	858.526	M-H	61278	PI(20:4(5Z,8Z,11Z,14Z)/16:0)	Endogenous;Food;Microbial Metabolites
857.5172	858.526	M-H	61284	PI(20:4(8Z,11Z,14Z,17Z)/16:0)	Endogenous;Food;Microbial Metabolites
NEG	874.559	8.34	6.5703e-05	0.0053189	0.39257	-1.349	0.053141	0.27712	0.63249	-0.66089	3.2375e-05	0.0022015	0.34749	-1.5249	0.00089514	0.010495	0.21398	-2.2245	0.057392	0.18101	0.54507	-0.87548	0.028875	0.12952	0.33831	-1.5636	0.10568	0.30023	0.61578	-0.69952
QueryMZ	MetlinMass	Adducts	MID	Common_name	Annotation
NEG	133.012	0.35	7.7669e-05	0.0060017	0.28003	-1.8363	0.21208	0.55734	0.75192	-0.41134	0.06239	0.19862	0.63534	-0.65441	0.027054	0.10847	0.49912	-1.0025	0.03368	0.12833	1.7824	0.8338	0.35852	0.59646	0.66379	-0.5912	0.30767	0.57668	0.7856	-0.34813
QueryMZ	MetlinMass	Adducts	MID	Common_name	Annotation
133.0117	134.058	M-H	5410	2,3-Dihydroxyvaleric acid	Endogenous;Food
133.0117	134.058	M-H	74696	2,3-dihydroxy-valeric acid	Endogenous;Food
133.0117	134.022	M-H	118	Malic acid	Endogenous;Food;Microbial Metabolites;TCM Ingredients
133.0117	134.033	M-H	5935	(S)-Ureidoglycolic acid	Endogenous;Food;Microbial Metabolites;Plant
133.0117	134.058	M-H	6138	1-Deoxy-D-xylulose	Endogenous;Food;Microbial Metabolites
133.0117	134.059	M-H	6249	Dihydropteridine	Endogenous;Food;Microbial Metabolites
133.0117	134.058	M-H	3258	2-Deoxy-D-Ribose	Endogenous;Food;Microbial Metabolites
133.0117	134.058	M-H	62808	(R)-2,3-Dihydroxy-isovalerate	Endogenous;Food;Microbial Metabolites
133.0117	134.058	M-H	86357	2,3-Dihydroxy-2-methylbutanoic acid	Endogenous;Food
133.0117	134.022	M-H	63096	D-(+)-Malic acid	Endogenous;Food;Microbial Metabolites;Plant;TCM Ingredients
133.0117	134.04	M-H	87736	Ethyl 2-mercaptopropionate	Endogenous;Food
133.0117	134.04	M-H	88433	Methyl 3-mercaptobutanoate	Endogenous;Food
133.0117	134.04	M-H	89887	Methyl 3-(methylthio)propanoate	Endogenous;Food;Microbial Metabolites;Plant
133.0117	134.04	M-H	94792	Ethyl 2-(methylthio)acetate	Endogenous;Food;Plant
133.0117	134.058	M-H	5410	2,3-Dihydroxyvaleric acid	Endogenous;Food
133.0117	134.058	M-H	6138	1-Deoxy-D-xylulose	Endogenous;Food;Microbial Metabolites
133.0117	134.058	M-H	3258	2-Deoxy-D-Ribose	Endogenous;Food;Microbial Metabolites
NEG	593.263	5.08	9.239e-05	0.0068288	1.9066	0.931	0.91015	0.97639	1.0109	0.015679	0.010293	0.060659	1.3769	0.46139	0.33975	0.54851	1.2245	0.29217	0.025601	0.10962	0.64223	-0.63883	0.36977	0.60853	1.2112	0.27649	0.40933	0.68021	0.88932	-0.16922
QueryMZ	MetlinMass	Adducts	MID	Common_name	Annotation
NEG	407.207	3.21	0.00011413	0.0080841	0.18523	-2.4326	0.26482	0.62059	0.78923	-0.34148	0.019011	0.090784	0.57248	-0.8047	0.052925	0.17505	2.0745	1.0528	0.00024848	0.0051515	11.2	3.4854	0.014962	0.094059	2.6285	1.3943	0.0028563	0.036007	3.6237	1.8575
QueryMZ	MetlinMass	Adducts	MID	Common_name	Annotation
407.2066	408.194	M-H	86323	3-Hydroxyglabrol	Endogenous;Food;Plant;TCM Ingredients
407.2066	408.194	M-H	87512	(E)-2',4,4',6'-Tetrahydroxy-3',5'-diprenylchalcone	Endogenous;Food
407.2066	408.194	M-H	52061	3'-Geranylchalconaringenin	Endogenous;Food;Plant
407.2066	408.194	M-H	52259	4,2',4'-Trihydroxy-6''-methyl-6''-(4-methyl-3-pentenyl)pyrano[2'',3'':3,2]dihydrochalcone	Endogenous;Food;Plant
407.2066	408.23	M-H	88123	cis-Methylbixin	Endogenous;Food;Plant
407.2066	408.194	M-H	51924	Kuwanol D	Endogenous;Food;Plant;TCM Ingredients
407.2066	408.215	M-H	67403	Cascarillin	Endogenous;Food;Plant
407.2066	408.215	M-H	91867	Anhydrocinnzeylanine	Endogenous;Food
407.2066	408.23	M-H	93684	trans-Methylbixin	Endogenous;Food;TCM Ingredients
407.2066	408.178	M-H	93690	3-O-Methylniveusin A	Endogenous;Food
407.2066	408.228	M-H	82335	1-(9Z-hexadecenoyl)-glycero-3-phosphate	Endogenous;Food;Microbial Metabolites
407.2066	408.228	M-H	82335	PA(16:1(9Z)/0:0)	Endogenous;Food;Microbial Metabolites
407.2066	408.194	M-H	86323	3-Hydroxyglabrol	Endogenous;Food;Plant;TCM Ingredients
407.2066	408.215	M-H	67403	Cascarillin	Endogenous;Food;Plant
407.2066	408.178	M-H	93690	3-O-Methylniveusin A	Endogenous;Food
NEG	568.268	5.1	0.00012171	0.0082763	1.5832	0.66285	0.16803	0.50379	1.246	0.31736	0.0093242	0.056409	1.5683	0.64921	0.80349	0.89511	1.0811	0.11252	0.022138	0.10036	0.68286	-0.55033	0.46149	0.68899	0.86763	-0.20484	0.092055	0.27698	0.68935	-0.53669
QueryMZ	MetlinMass	Adducts	MID	Common_name	Annotation
NEG	943.551	8.34	0.00013303	0.0086667	0.47355	-1.0784	0.011712	0.15199	0.65241	-0.61615	0.00036288	0.0069315	0.50971	-0.97225	0.00019263	0.0033416	0.34826	-1.5218	0.093985	0.25605	0.73543	-0.44335	0.010357	0.080768	0.53381	-0.90561	0.052748	0.18825	0.68326	-0.5495
QueryMZ	MetlinMass	Adducts	MID	Common_name	Annotation
943.5513	944.539	M-H	61311	PIP(16:0/20:1(11Z))	Endogenous;Food;Microbial Metabolites
943.5513	944.539	M-H	61331	PIP(18:0/18:1(11Z))	Endogenous;Food;Microbial Metabolites
943.5513	944.539	M-H	61332	PIP(18:0/18:1(9Z))	Endogenous;Food;Microbial Metabolites
943.5513	944.539	M-H	61342	PIP(18:1(11Z)/18:0)	Endogenous;Food;Microbial Metabolites
943.5513	944.539	M-H	61354	PIP(18:1(9Z)/18:0)	Endogenous;Food;Microbial Metabolites
943.5513	944.539	M-H	61379	PIP(20:1(11Z)/16:0)	Endogenous;Food;Microbial Metabolites
943.5513	944.534	M-H	88632	Quinquenoside L1	Endogenous;Food
943.5513	944.513	M-H	92727	Tragopogonsaponin M	Endogenous;Food
943.5513	944.534	M-H	94087	Phaseoluside A	Endogenous;Food
943.5513	944.534	M-H	88632	Quinquenoside L1	Endogenous;Food
943.5513	944.534	M-H	94087	Phaseoluside A	Endogenous;Food
NEG	1093.73	5.96	0.00013765	0.0086667	0.56601	-0.8211	0.0091764	0.13805	0.63935	-0.64533	0.00013499	0.0038248	0.4613	-1.1162	0.0037111	0.030822	0.20648	-2.2759	0.01612	0.084318	0.36479	-1.4548	0.014412	0.093551	0.32295	-1.6306	0.03258	0.13987	0.4476	-1.1597
QueryMZ	MetlinMass	Adducts	MID	Common_name	Annotation
NEG	917.534	8.24	0.00014908	0.0090513	0.58352	-0.77715	0.012246	0.15652	0.73357	-0.447	0.0002573	0.0055855	0.58959	-0.76221	0.0052076	0.036462	0.562	-0.83136	0.69779	0.82723	0.96312	-0.054212	0.14827	0.36319	0.76612	-0.38437	0.66997	0.84623	0.9532	-0.069155
QueryMZ	MetlinMass	Adducts	MID	Common_name	Annotation
917.534	918.523	M-H	61307	PIP(16:0/18:0)	Endogenous;Food;Microbial Metabolites
917.534	918.523	M-H	61328	PIP(18:0/16:0)	Endogenous;Food;Microbial Metabolites
NEG	945.566	8.66	0.00017036	0.0099865	0.64898	-0.62376	0.34259	0.7	0.91204	-0.13284	0.080445	0.23867	0.8527	-0.22989	0.0065078	0.042388	0.64931	-0.62303	0.8872	0.93473	1.0005	0.00073314	0.044253	0.17178	0.71193	-0.49019	0.05293	0.18825	0.76147	-0.39314
QueryMZ	MetlinMass	Adducts	MID	Common_name	Annotation
945.5663	946.55	M-H	90775	Notoginsenoside K	Endogenous;Food;Plant;TCM Ingredients
945.5663	946.55	M-H	67292	Ginsenoside Re	Endogenous;Food;Plant;TCM Ingredients
945.5663	946.55	M-H	91017	Ginsenoside Rd	Endogenous;Food;Plant;TCM Ingredients
945.5663	946.55	M-H	94106	Gynosaponin S	Endogenous;Food;Plant;TCM Ingredients
945.5663	946.55	M-H	90775	Notoginsenoside K	Endogenous;Food;Plant;TCM Ingredients
945.5663	946.55	M-H	94106	Gynosaponin S	Endogenous;Food;Plant;TCM Ingredients
945.5663	946.55	M-H	67292	Ginsenoside Re	Endogenous;Food;Plant;TCM Ingredients
NEG	616.285	5.94	0.00019565	0.010741	1.7659	0.82043	0.38218	0.72743	1.152	0.20416	0.48412	0.71887	1.0659	0.092069	0.41899	0.61483	1.1828	0.24223	0.016834	0.086154	0.6698	-0.5782	0.92657	0.96874	1.0267	0.038069	0.6468	0.83843	1.1097	0.15016
QueryMZ	MetlinMass	Adducts	MID	Common_name	Annotation
NEG	875.563	8.34	0.00019804	0.010741	0.39474	-1.341	0.046653	0.27132	0.6282	-0.6707	6.1509e-05	0.0026949	0.38143	-1.3905	0.00087647	0.010347	0.23499	-2.0893	0.092638	0.25401	0.59531	-0.74829	0.030212	0.13368	0.37407	-1.4186	0.087306	0.26694	0.61607	-0.69882
QueryMZ	MetlinMass	Adducts	MID	Common_name	Annotation
NEG	596.391	6.62	0.00020421	0.010741	0.3561	-1.4897	0.059472	0.29136	0.58044	-0.78478	0.028956	0.11885	0.54727	-0.86967	0.0012744	0.013887	0.19534	-2.356	0.036094	0.13341	0.54855	-0.8663	0.020258	0.10662	0.33654	-1.5712	0.018632	0.10915	0.35693	-1.4863
QueryMZ	MetlinMass	Adducts	MID	Common_name	Annotation
NEG	500.277	5.11	0.00020971	0.010741	2.0793	1.0561	0.060711	0.29488	1.2772	0.35298	0.016388	0.083175	1.5364	0.61953	0.40831	0.60611	0.90482	-0.1443	0.0017508	0.021885	0.43516	-1.2004	0.061453	0.21291	0.70844	-0.49728	0.027792	0.13095	0.58893	-0.76383
QueryMZ	MetlinMass	Adducts	MID	Common_name	Annotation
500.2775	501.288	M-H	2766	Fexofenadine	Drug;Drug Metabolite;Endogenous;Food;Toxins/Pollutant
500.2775	501.286	M-H	62275	LysoPE(0:0/20:4(5Z,8Z,11Z,14Z))	Endogenous;Food
500.2775	501.286	M-H	62276	LysoPE(0:0/20:4(8Z,11Z,14Z,17Z))	Endogenous;Food
500.2775	501.286	M-H	46715	PE(20:4(5Z,8Z,11Z,14Z)/0:0)	Endogenous;Food
500.2775	501.286	M-H	62302	LysoPE(20:4(8Z,11Z,14Z,17Z)/0:0)	Endogenous;Food
NEG	623.334	5.63	0.00021482	0.010741	0.49202	-1.0232	0.025233	0.21278	0.65312	-0.61458	2.0376e-05	0.0022015	0.44361	-1.1726	0.00074313	0.0092213	0.27203	-1.8782	0.025429	0.10932	0.55288	-0.85496	0.011468	0.085504	0.4165	-1.2636	0.036196	0.15045	0.61321	-0.70555
QueryMZ	MetlinMass	Adducts	MID	Common_name	Annotation
NEG	568.361	5.96	0.00025541	0.012406	0.7239	-0.46614	0.023226	0.21225	0.78131	-0.35604	0.00016113	0.0042801	0.67325	-0.57078	0.0044165	0.033973	0.35681	-1.4868	0.018195	0.089352	0.49289	-1.0207	0.016497	0.09539	0.45668	-1.1308	0.0274	0.13063	0.52997	-0.91601
QueryMZ	MetlinMass	Adducts	MID	Common_name	Annotation
568.3614	569.348	M-H	61711	LysoPC(22:5(4Z,7Z,10Z,13Z,16Z))	Endogenous;Food;Microbial Metabolites
568.3614	569.348	M-H	61712	LysoPC(22:5(7Z,10Z,13Z,16Z,19Z))	Endogenous;Food;Microbial Metabolites
568.3614	569.351	M-H	95159	Janthitrem C	Endogenous;Food;Toxins/Pollutant
NEG	848.544	8.24	0.00027233	0.01277	0.47383	-1.0776	0.021273	0.20431	0.66354	-0.59174	3.2826e-06	0.0015252	0.44144	-1.1797	0.00026162	0.0041959	0.29089	-1.7815	0.057741	0.18178	0.61391	-0.7039	0.010878	0.082556	0.43839	-1.1897	0.035696	0.14873	0.65895	-0.60176
QueryMZ	MetlinMass	Adducts	MID	Common_name	Annotation
NEG	615.459	7.58	0.00027794	0.01277	0.50875	-0.97498	1.5018e-05	0.0053365	3.8405	1.9413	0.34409	0.59381	2.8975	1.5348	0.0081073	0.046304	2.1107	1.0777	8.61e-05	0.0023995	4.1487	2.0527	0.033656	0.14412	0.54957	-0.86362	0.79504	0.91138	0.72845	-0.4571
QueryMZ	MetlinMass	Adducts	MID	Common_name	Annotation
615.4586	616.507	M-H	58666	DG(14:0/22:4(7Z,10Z,13Z,16Z)/0:0)	Endogenous;Food
615.4586	616.507	M-H	4379	DG(16:0/20:4(5Z,8Z,11Z,14Z)/0:0)[iso2]	Endogenous;Food;Microbial Metabolites
615.4586	616.507	M-H	58736	DG(16:0/20:4(8Z,11Z,14Z,17Z)/0:0)	Endogenous;Food
615.4586	616.507	M-H	58747	DG(16:1(9Z)/20:3(5Z,8Z,11Z)/0:0)	Endogenous;Food
615.4586	616.507	M-H	4378	DG(16:1(9Z)/20:3(8Z,11Z,14Z)/0:0)[iso2]	Endogenous;Food
615.4586	616.507	M-H	58758	DG(18:0/18:4(6Z,9Z,12Z,15Z)/0:0)	Endogenous;Food
615.4586	616.507	M-H	58773	DG(18:1(11Z)/18:3(6Z,9Z,12Z)/0:0)	Endogenous;Food
615.4586	616.507	M-H	58774	DG(18:1(11Z)/18:3(9Z,12Z,15Z)/0:0)	Endogenous;Food
615.4586	616.507	M-H	58799	DG(18:1(9Z)/18:3(6Z,9Z,12Z)/0:0)	Endogenous;Food
615.4586	616.507	M-H	4373	DG(18:1(9Z)/18:3(9Z,12Z,15Z)/0:0)[iso2]	Endogenous;Food
615.4586	616.507	M-H	4371	DG(18:2(9Z,12Z)/18:2(9Z,12Z)/0:0)	Endogenous;Food;Microbial Metabolites;TCM Ingredients
615.4586	616.507	M-H	58827	DG(18:3(6Z,9Z,12Z)/18:1(11Z)/0:0)	Endogenous;Food
615.4586	616.507	M-H	58828	DG(18:3(6Z,9Z,12Z)/18:1(9Z)/0:0)	Endogenous;Food
615.4586	616.507	M-H	58856	DG(18:3(9Z,12Z,15Z)/18:1(11Z)/0:0)	Endogenous;Food
615.4586	616.507	M-H	58857	DG(18:3(9Z,12Z,15Z)/18:1(9Z)/0:0)	Endogenous;Food
615.4586	616.507	M-H	58871	DG(18:4(6Z,9Z,12Z,15Z)/18:0/0:0)	Endogenous;Food
615.4586	616.507	M-H	58952	DG(20:3(5Z,8Z,11Z)/16:1(9Z)/0:0)	Endogenous;Food
615.4586	616.507	M-H	58981	DG(20:3(8Z,11Z,14Z)/16:1(9Z)/0:0)	Endogenous;Food
615.4586	616.507	M-H	59000	DG(20:4(5Z,8Z,11Z,14Z)/16:0/0:0)	Endogenous;Food
615.4586	616.507	M-H	59021	DG(20:4(8Z,11Z,14Z,17Z)/16:0/0:0)	Endogenous;Food
615.4586	616.507	M-H	59141	DG(22:4(7Z,10Z,13Z,16Z)/14:0/0:0)	Endogenous;Food
615.4586	616.449	M-H	90459	Oryzanol C	Endogenous;Food
615.4586	616.434	M-H	90790	Tsugarioside B	Endogenous;Food;TCM Ingredients
615.4586	616.507	M-H	58736	DG(16:0/20:4(8Z,11Z,14Z,17Z)/0:0)	Endogenous;Food
615.4586	616.434	M-H	90790	Tsugarioside B	Endogenous;Food;TCM Ingredients
NEG	1091.73	5.96	0.00029356	0.013133	0.57542	-0.79731	0.018977	0.19552	0.64326	-0.63653	6.6529e-05	0.0026949	0.47651	-1.0694	0.0047751	0.035274	0.18146	-2.4623	0.015584	0.083047	0.31535	-1.665	0.01539	0.094059	0.2821	-1.8257	0.024867	0.12599	0.38081	-1.3928
QueryMZ	MetlinMass	Adducts	MID	Common_name	Annotation
1091.7253	1092.73	M-H	7148	Ganglioside GA2 (d18:1/18:0)	Endogenous;Food
NEG	626.274	5.62	0.00030956	0.013494	0.51386	-0.96056	0.049862	0.27245	0.64328	-0.63647	8.069e-05	0.0026949	0.42553	-1.2327	0.00042568	0.0061327	0.21454	-2.2207	0.0086927	0.062883	0.4175	-1.2602	0.017192	0.097008	0.3335	-1.5842	0.026019	0.12934	0.50416	-0.98804
QueryMZ	MetlinMass	Adducts	MID	Common_name	Annotation
626.2735	627.249	M-H	58520	Tri-N-acetylchitotriose	Endogenous;Food
NEG	569.365	5.96	0.00031922	0.013502	0.72251	-0.4689	0.023152	0.21225	0.7782	-0.36179	0.00013232	0.0038125	0.66131	-0.5966	0.0042464	0.033421	0.35298	-1.5023	0.017302	0.087379	0.48855	-1.0334	0.015876	0.094679	0.45359	-1.1405	0.028125	0.13158	0.53377	-0.90572
QueryMZ	MetlinMass	Adducts	MID	Common_name	Annotation
569.3645	570.356	M-H	90597	Ganodermic acid P2	Endogenous;Food;Plant;TCM Ingredients
569.3645	570.356	M-H	90598	Ganoderic acid Mk	Endogenous;Food;Plant
569.3645	570.356	M-H	90879	3alpha,15alpha-Diacetoxy-(22R)-hydroxylanosta-7,9(11),24-trien-26-oic acid	Endogenous;Food
569.3645	570.335	M-H	90957	Pyrrhoxanthinol	Endogenous;Food;Plant;TCM Ingredients
569.3645	570.392	M-H	93735	Hericenone C	Endogenous;Food;TCM Ingredients
569.3645	570.356	M-H	90597	Ganodermic acid P2	Endogenous;Food;Plant;TCM Ingredients
569.3645	570.356	M-H	90598	Ganoderic acid Mk	Endogenous;Food;Plant
569.3645	570.356	M-H	90879	3alpha,15alpha-Diacetoxy-(22R)-hydroxylanosta-7,9(11),24-trien-26-oic acid	Endogenous;Food
569.3645	570.335	M-H	90957	Pyrrhoxanthinol	Endogenous;Food;Plant;TCM Ingredients
NEG	1092.73	5.96	0.00033233	0.013502	0.56178	-0.83193	0.019461	0.19846	0.63677	-0.65116	0.00017033	0.0044548	0.48394	-1.0471	0.0043654	0.033887	0.18671	-2.4211	0.015899	0.083939	0.33236	-1.5892	0.015392	0.094059	0.29321	-1.77	0.02437	0.1248	0.38581	-1.374
QueryMZ	MetlinMass	Adducts	MID	Common_name	Annotation
NEG	690.323	5.63	0.00033359	0.013502	0.53531	-0.90154	0.004444	0.10493	0.63872	-0.64675	7.7223e-05	0.0026949	0.47758	-1.0662	0.00018168	0.0032173	0.22211	-2.1707	0.0045122	0.043583	0.41491	-1.2691	0.0020072	0.034122	0.34774	-1.5239	0.008284	0.070414	0.46506	-1.1045
QueryMZ	MetlinMass	Adducts	MID	Common_name	Annotation
NEG	524.278	5.09	0.00035143	0.013894	2.1345	1.0939	0.6403	0.86163	1.0458	0.064599	0.043097	0.15588	1.3204	0.401	0.90507	0.9459	1.0475	0.066974	0.01385	0.077091	0.49074	-1.027	0.74158	0.88221	1.0016	0.0023754	0.22534	0.4774	0.79332	-0.33403
QueryMZ	MetlinMass	Adducts	MID	Common_name	Annotation
524.2775	525.28	M-H	5554	Desmosine	Endogenous;Food
524.2775	525.28	M-H	5707	Isodesmosine	Endogenous;Food
524.2775	525.286	M-H	62284	LysoPE(0:0/22:6(4Z,7Z,10Z,13Z,16Z,19Z))	Endogenous;Food
524.2775	525.286	M-H	62310	LysoPE(22:6(4Z,7Z,10Z,13Z,16Z,19Z)/0:0)	Endogenous;Food
524.2775	525.286	M-H	77679	PE(22:6(4Z,7Z,10Z,13Z,16Z,19Z)/0:0)	Endogenous;Food
524.2775	525.286	M-H	62310	LysoPE(22:6(4Z,7Z,10Z,13Z,16Z,19Z)/0:0)	Endogenous;Food
NEG	580.359	5.78	0.0004148	0.01589	0.51962	-0.94448	0.10201	0.38797	0.69539	-0.52411	0.00030347	0.0061203	0.46634	-1.1005	6.844e-05	0.0016273	0.18488	-2.4353	0.00062509	0.01012	0.3558	-1.4908	0.0038831	0.046163	0.26587	-1.9112	0.0020871	0.032234	0.39645	-1.3348
QueryMZ	MetlinMass	Adducts	MID	Common_name	Annotation
NEG	668.286	5.96	0.00042063	0.01589	0.70033	-0.5139	0.011274	0.15199	0.78539	-0.34851	0.0033505	0.030403	0.73977	-0.43485	0.001814	0.018355	0.43663	-1.1955	0.018662	0.090124	0.62346	-0.68162	0.0089148	0.074679	0.55593	-0.84701	0.014429	0.093624	0.59022	-0.76068
QueryMZ	MetlinMass	Adducts	MID	Common_name	Annotation
NEG	508.34	5.96	0.00045637	0.016866	0.72098	-0.47197	0.022493	0.21114	0.76855	-0.37979	0.00018232	0.004626	0.66152	-0.59614	0.0044165	0.033973	0.3513	-1.5092	0.017694	0.088071	0.48725	-1.0373	0.017321	0.097008	0.45709	-1.1294	0.028204	0.13158	0.53104	-0.9131
QueryMZ	MetlinMass	Adducts	MID	Common_name	Annotation
508.3401	509.385	M-H	40388	PC(O-18:0/0:0)	Endogenous;Food;TCM Ingredients
508.3401	509.385	M-H	40390	PC(O-18:0/0:0)[U]	Endogenous;Food;TCM Ingredients
508.3401	509.385	M-H	43411	Lyso-PAF C-18	Endogenous;Food;TCM Ingredients
508.3401	509.348	M-H	62269	LysoPE(0:0/20:0)	Endogenous;Food
508.3401	509.348	M-H	62296	LysoPE(20:0/0:0)	Endogenous;Food
508.3401	509.348	M-H	77678	PE(20:0/0:0)	Endogenous;Food
508.3401	509.348	M-H	24068	1-heptadecanoyl-sn-glycero-3-phosphocholine	Endogenous;Food;Microbial Metabolites;TCM Ingredients
508.3401	509.348	M-H	40290	PC(17:0/0:0)	Endogenous;Food;Microbial Metabolites;TCM Ingredients
508.3401	509.348	M-H	40291	PC(17:0/0:0)[U]	Endogenous;Food;Microbial Metabolites;TCM Ingredients
508.3401	509.348	M-H	62785	LysoPC(17:0)	Endogenous;Food;Microbial Metabolites;TCM Ingredients
508.3401	509.385	M-H	40388	PC(O-18:0/0:0)	Endogenous;Food;TCM Ingredients
508.3401	509.385	M-H	40390	PC(O-18:0/0:0)[U]	Endogenous;Food;TCM Ingredients
508.3401	509.385	M-H	43411	Lyso-PAF C-18	Endogenous;Food;TCM Ingredients
508.3401	509.348	M-H	62296	LysoPE(20:0/0:0)	Endogenous;Food
508.3401	509.348	M-H	24068	1-heptadecanoyl-sn-glycero-3-phosphocholine	Endogenous;Food;Microbial Metabolites;TCM Ingredients
508.3401	509.348	M-H	40290	PC(17:0/0:0)	Endogenous;Food;Microbial Metabolites;TCM Ingredients
508.3401	509.348	M-H	40291	PC(17:0/0:0)[U]	Endogenous;Food;Microbial Metabolites;TCM Ingredients
NEG	212.002	1.2	0.0005028	0.018186	0.28076	-1.8326	0.20829	0.55501	2.3106	1.2082	0.1923	0.42777	1.4942	0.57933	0.19599	0.40336	0.74166	-0.43117	0.50128	0.69283	2.6416	1.4014	0.09394	0.28053	0.32099	-1.6394	0.084286	0.25911	0.49638	-1.0105
QueryMZ	MetlinMass	Adducts	MID	Common_name	Annotation
212.0021	213.019	M-H	24107	m-Chlorohippuric acid	Endogenous;Food
212.0021	213.004	M-H	360	4-Phospho-L-aspartate	Endogenous;Food;Microbial Metabolites;TCM Ingredients
212.0021	213.04	M-H	88392	N-Lactoyl ethanolamine phosphate	Endogenous;Food
212.0021	213.004	M-H	360	4-Phospho-L-aspartate	Endogenous;Food;Microbial Metabolites;TCM Ingredients
NEG	1010.53	8.34	0.00068313	0.024002	0.5697	-0.81174	0.081185	0.34677	0.72158	-0.47076	8.0848e-05	0.0026949	0.54034	-0.88806	0.00065904	0.0084877	0.35551	-1.492	0.031264	0.12268	0.62404	-0.68029	0.037862	0.15623	0.49268	-1.0213	0.029557	0.13258	0.65794	-0.60397
QueryMZ	MetlinMass	Adducts	MID	Common_name	Annotation
NEG	331.19	3.21	0.00069182	0.024002	0.2417	-2.0487	0.75138	0.9221	0.91932	-0.12135	0.033569	0.1317	0.61422	-0.70316	0.027488	0.10987	2.2938	1.1977	0.00052016	0.0085851	9.4901	3.2464	0.011819	0.086672	2.4951	1.3191	0.0015311	0.026834	3.7344	1.9009
QueryMZ	MetlinMass	Adducts	MID	Common_name	Annotation
331.19	332.235	M-H	5304	16-a-Hydroxypregnenolone	Endogenous;Food;Microbial Metabolites
331.19	332.235	M-H	41866	17a-Hydroxypregnenolone	Endogenous;Food
331.19	332.235	M-H	7002	21-hydroxypregnenolone	Endogenous;Food;TCM Ingredients
331.19	332.235	M-H	57873	(20S)-17,20-dihydroxypregn-4-en-3-one	Endogenous;Food
331.19	332.148	M-H	85722	Glutaminyl-Tryptophan	Endogenous
331.19	332.185	M-H	85864	Lysyl-Tryptophan	Endogenous
331.19	332.148	M-H	85974	Tryptophyl-Glutamine	Endogenous
331.19	332.185	M-H	85981	Tryptophyl-Lysine	Endogenous
331.19	332.148	M-H	85990	Tryptophyl-Gamma-glutamate	Endogenous
331.19	332.148	M-H	86052	Gamma-glutamyl-Tryptophan	Endogenous
331.19	332.184	M-H	86491	Unshuoside A	Endogenous;Food
331.19	332.199	M-H	86722	Hulupone	Endogenous;Food
331.19	332.199	M-H	86747	Adhulupone	Endogenous;Food
331.19	332.162	M-H	87195	(R)-Marmin	Endogenous;Food;Plant;TCM Ingredients
331.19	332.199	M-H	87627	(1(10)E,4E,6a,9b)-9-(2-Methylbutanoyloxy)-1(10),4,11(13)-germacratrien-12,6-olide	Endogenous;Food
331.19	332.199	M-H	87628	(1(10)E,4E,6a,9b)-9-(3-Methylbutanoyloxy)-1(10),4,11(13)-germacratrien-12,6-olide	Endogenous;Food
331.19	332.235	M-H	87698	[10]-Shogaol	Endogenous;Food;Plant;TCM Ingredients
331.19	332.184	M-H	88911	7-Hydroxyterpineol 8-glucoside	Endogenous;Food;Plant
331.19	332.184	M-H	89001	(1S,2S,4R)-1,8-Epoxy-p-menthan-2-ol glucoside	Endogenous;Food;Plant;TCM Ingredients
331.19	332.184	M-H	89082	1,8-Epoxy-p-menthan-4-ol glucoside	Endogenous;Food
331.19	332.184	M-H	89087	(1R,2R,4S,6R)-2,6-Fenchanediol 2-O-b-D-glucoside	Endogenous;Food
331.19	332.184	M-H	89088	(1R,2S,4R,5S)-2,5-Fenchanediol 2-O-b-D-glucoside	Endogenous;Food
331.19	332.184	M-H	89443	(1S,2S,4S,5S)-2,4-Thujanediol 4-O-beta-D-Glucopyranoside	Endogenous;Food
331.19	332.235	M-H	89617	(15alpha,20R)-15,20-Dihydroxypregn-4-en-3-one	Endogenous;Food
331.19	332.184	M-H	90196	(1R,3S,4S)-1,8-Epoxy-p-menthan-3-ol glucoside	Endogenous;Food;Plant
331.19	332.162	M-H	90351	Gibberellin A61	Endogenous;Food;Plant;TCM Ingredients
331.19	332.184	M-H	90384	6Z-8-Hydroxygeraniol 8-O-glucoside	Endogenous;Food
331.19	332.162	M-H	90398	Gibberellin A45	Endogenous;Food;Plant;TCM Ingredients
331.19	332.184	M-H	90903	Betulalbuside A	Endogenous;Food;TCM Ingredients
331.19	332.199	M-H	90905	Petasitin	Endogenous;Food;Plant;TCM Ingredients
331.19	332.199	M-H	91301	6-Angeloylfuranofukinol	Endogenous;Food
331.19	332.199	M-H	67412	7beta,12alpha-Dihydroxykaurenolide	Endogenous;Food;Plant;TCM Ingredients
331.19	332.199	M-H	91756	ent-15-Kaurene-17,19-dioic acid	Endogenous;Food
331.19	332.199	M-H	91787	7,18-Dihydroxykaurenolide	Endogenous;Food;Plant;TCM Ingredients
331.19	332.162	M-H	92789	Gibberellin A70	Endogenous;Food;Plant;TCM Ingredients
331.19	332.184	M-H	93400	(2E,4E,7R)-2,7-Dimethyl-2,4-octadiene-1,8-diol 8-O-b-D-glucopyranoside	Endogenous;Food
331.19	332.199	M-H	93575	(9Z,11S,16S)-1-Acetoxy-9,17-octadecadiene-12,14-diyne-11,16-diol	Endogenous;Food
331.19	332.184	M-H	93588	(4R,6S)-p-Menth-1-ene-4,6-diol 4-glucoside	Endogenous;Food
331.19	332.184	M-H	93589	(S)-p-Menth-1-ene-4,7-diol 4-glucoside	Endogenous;Food
331.19	332.184	M-H	93661	(1S,2R,4R)-p-Menth-8-ene-2,10-diol 2-glucoside	Endogenous;Food
331.19	332.235	M-H	63331	5&alpha;-Dihydrodeoxycorticosterone	Endogenous;Food
331.19	332.235	M-H	63330	7&alpha;-Hydroxypregnenolone	Endogenous;Food
331.19	332.148	M-H	85722	Glutaminyl-Tryptophan	Endogenous
331.19	332.148	M-H	86052	Gamma-glutamyl-Tryptophan	Endogenous
331.19	332.184	M-H	86491	Unshuoside A	Endogenous;Food
331.19	332.199	M-H	86747	Adhulupone	Endogenous;Food
331.19	332.199	M-H	87627	(1(10)E,4E,6a,9b)-9-(2-Methylbutanoyloxy)-1(10),4,11(13)-germacratrien-12,6-olide	Endogenous;Food
331.19	332.199	M-H	87628	(1(10)E,4E,6a,9b)-9-(3-Methylbutanoyloxy)-1(10),4,11(13)-germacratrien-12,6-olide	Endogenous;Food
331.19	332.184	M-H	88911	7-Hydroxyterpineol 8-glucoside	Endogenous;Food;Plant
331.19	332.184	M-H	89001	(1S,2S,4R)-1,8-Epoxy-p-menthan-2-ol glucoside	Endogenous;Food;Plant;TCM Ingredients
331.19	332.184	M-H	89082	1,8-Epoxy-p-menthan-4-ol glucoside	Endogenous;Food
331.19	332.184	M-H	89443	(1S,2S,4S,5S)-2,4-Thujanediol 4-O-beta-D-Glucopyranoside	Endogenous;Food
331.19	332.235	M-H	89617	(15alpha,20R)-15,20-Dihydroxypregn-4-en-3-one	Endogenous;Food
331.19	332.184	M-H	90196	(1R,3S,4S)-1,8-Epoxy-p-menthan-3-ol glucoside	Endogenous;Food;Plant
331.19	332.162	M-H	90351	Gibberellin A61	Endogenous;Food;Plant;TCM Ingredients
331.19	332.184	M-H	90384	6Z-8-Hydroxygeraniol 8-O-glucoside	Endogenous;Food
331.19	332.184	M-H	90903	Betulalbuside A	Endogenous;Food;TCM Ingredients
331.19	332.199	M-H	90905	Petasitin	Endogenous;Food;Plant;TCM Ingredients
331.19	332.199	M-H	67412	7beta,12alpha-Dihydroxykaurenolide	Endogenous;Food;Plant;TCM Ingredients
331.19	332.199	M-H	91756	ent-15-Kaurene-17,19-dioic acid	Endogenous;Food
331.19	332.162	M-H	92789	Gibberellin A70	Endogenous;Food;Plant;TCM Ingredients
331.19	332.184	M-H	93400	(2E,4E,7R)-2,7-Dimethyl-2,4-octadiene-1,8-diol 8-O-b-D-glucopyranoside	Endogenous;Food
331.19	332.199	M-H	93575	(9Z,11S,16S)-1-Acetoxy-9,17-octadecadiene-12,14-diyne-11,16-diol	Endogenous;Food
331.19	332.184	M-H	93588	(4R,6S)-p-Menth-1-ene-4,6-diol 4-glucoside	Endogenous;Food
331.19	332.184	M-H	93589	(S)-p-Menth-1-ene-4,7-diol 4-glucoside	Endogenous;Food
331.19	332.184	M-H	93661	(1S,2R,4R)-p-Menth-8-ene-2,10-diol 2-glucoside	Endogenous;Food
NEG	859.532	12.16	0.000756	0.025704	0.38327	-1.3836	0.25752	0.61572	0.74434	-0.42597	0.10045	0.27761	0.6343	-0.65677	0.012069	0.061613	0.42026	-1.2506	0.73958	0.84838	1.0965	0.13294	0.059746	0.20985	0.56461	-0.82468	0.19006	0.43234	0.66256	-0.59387
QueryMZ	MetlinMass	Adducts	MID	Common_name	Annotation
859.5319	860.541	M-H	61172	PI(16:0/20:3(5Z,8Z,11Z))	Endogenous;Food;Microbial Metabolites
859.5319	860.541	M-H	61173	PI(16:0/20:3(8Z,11Z,14Z))	Endogenous;Food;Microbial Metabolites
859.5319	860.541	M-H	61195	PI(18:0/18:3(6Z,9Z,12Z))	Endogenous;Food;Microbial Metabolites
859.5319	860.541	M-H	61196	PI(18:0/18:3(9Z,12Z,15Z))	Endogenous;Food;Microbial Metabolites
859.5319	860.541	M-H	61211	PI(18:1(11Z)/18:2(9Z,12Z))	Endogenous;Food;Microbial Metabolites
859.5319	860.541	M-H	61223	PI(18:1(9Z)/18:2(9Z,12Z))	Endogenous;Food;Microbial Metabolites
859.5319	860.541	M-H	61233	PI(18:2(9Z,12Z)/18:1(11Z))	Endogenous;Food;Microbial Metabolites
859.5319	860.541	M-H	61234	PI(18:2(9Z,12Z)/18:1(9Z))	Endogenous;Food;Microbial Metabolites
859.5319	860.541	M-H	61243	PI(18:3(6Z,9Z,12Z)/18:0)	Endogenous;Food;Microbial Metabolites
859.5319	860.541	M-H	61247	PI(18:3(9Z,12Z,15Z)/18:0)	Endogenous;Food;Microbial Metabolites
859.5319	860.541	M-H	61264	PI(20:3(5Z,8Z,11Z)/16:0)	Endogenous;Food;Microbial Metabolites
859.5319	860.541	M-H	61271	PI(20:3(8Z,11Z,14Z)/16:0)	Endogenous;Food;Microbial Metabolites
NEG	332.19	3.21	0.00083747	0.027612	0.35385	-1.4988	0.14984	0.48012	0.78032	-0.35787	0.053803	0.1776	0.66888	-0.58017	0.074167	0.21966	1.9218	0.94247	0.0011267	0.01637	5.4311	2.4412	0.012592	0.08846	2.4629	1.3003	0.0099683	0.078454	2.8732	1.5226
QueryMZ	MetlinMass	Adducts	MID	Common_name	Annotation
NEG	87.0045	0.34	0.00084459	0.027612	0.57862	-0.7893	0.23863	0.59075	0.86425	-0.21048	0.1821	0.41446	0.86852	-0.20337	0.17832	0.37988	0.82719	-0.27372	0.018897	0.090445	1.4296	0.51559	0.75987	0.89396	0.95711	-0.063239	0.48209	0.74235	0.95241	-0.070352
QueryMZ	MetlinMass	Adducts	MID	Common_name	Annotation
87.0045	88.0524	M-H	107	Butyric acid	Cosmetic;Drug;Endogenous;Food;Microbial Metabolites;Plant;TCM Ingredients;Toxins/Pollutant
87.0045	88.016	M-H	117	Pyruvate	Cosmetic;Drug;Endogenous;Food;Microbial Metabolites;Plant;TCM Ingredients;Toxins/Pollutant
87.0045	88.0524	M-H	106	Isobutyric acid	Cosmetic;Drug;Endogenous;Food;Microbial Metabolites;Plant;TCM Ingredients
87.0045	88.016	M-H	61978	Malonic semialdehyde	Endogenous;Food;Microbial Metabolites
87.0045	88.0524	M-H	86699	Methyl propionate	Cosmetic;Endogenous;Food;TCM Ingredients
87.0045	88.0524	M-H	65539	Ethyl acetate	Cosmetic;Endogenous;Food;Microbial Metabolites;Plant;TCM Ingredients
87.0045	88.0524	M-H	87725	1-Hydroxy-2-butanone	Endogenous;Food;Plant;TCM Ingredients
87.0045	88.0347	M-H	87837	3-(Methylthio)-1-propene	Endogenous;Food;Microbial Metabolites;TCM Ingredients
NEG	570.367	5.96	0.00088615	0.028424	0.72766	-0.45866	0.023919	0.21278	0.77398	-0.36963	0.00066502	0.010976	0.66343	-0.59199	0.0050727	0.036208	0.3561	-1.4897	0.01894	0.090445	0.48937	-1.031	0.017863	0.098453	0.46009	-1.12	0.032942	0.14035	0.53675	-0.89766
QueryMZ	MetlinMass	Adducts	MID	Common_name	Annotation
570.3672	571.364	M-H	61710	LysoPC(22:4(7Z,10Z,13Z,16Z))	Endogenous;Food;Microbial Metabolites
570.3672	571.364	M-H	76566	PC(22:4(7Z,10Z,13Z,16Z)/0:0)	Endogenous;Food;Microbial Metabolites
570.3672	571.364	M-H	61710	LysoPC(22:4(7Z,10Z,13Z,16Z))	Endogenous;Food;Microbial Metabolites
NEG	1094.73	5.96	0.00091763	0.028888	0.65638	-0.60739	0.047952	0.27245	0.71026	-0.49358	0.00054998	0.0093497	0.51864	-0.94719	0.0041976	0.033191	0.21449	-2.221	0.01311	0.075199	0.32678	-1.6136	0.015325	0.094059	0.30199	-1.7274	0.031339	0.13661	0.41357	-1.2738
QueryMZ	MetlinMass	Adducts	MID	Common_name	Annotation
NEG	150.941	12.29	0.00095815	0.029616	1.1415	0.19094	0.027186	0.22284	1.1065	0.14601	0.0035046	0.03087	1.1617	0.21627	0.0232	0.097864	1.1963	0.25858	0.5489	0.73289	1.048	0.06764	0.33817	0.5801	1.0812	0.11257	0.74551	0.88805	1.0298	0.042312
QueryMZ	MetlinMass	Adducts	MID	Common_name	Annotation
150.9409	151.978	M-H	6222	3-Sulfinylpyruvic acid	Endogenous;Food;Microbial Metabolites
150.9409	151.979	M-H	87704	3,5-Dimethyl-1,2,4-trithiolane	Endogenous;Food
150.9409	151.978	M-H	6222	3-Sulfinylpyruvic acid	Endogenous;Food;Microbial Metabolites
NEG	495.326	5.63	0.00099637	0.030247	0.51826	-0.94826	0.022128	0.20936	0.62731	-0.67276	1.5146e-05	0.0022015	0.47584	-1.0714	1.2066e-05	0.00048837	0.25846	-1.952	0.011662	0.070555	0.49871	-1.0037	0.01209	0.086672	0.41202	-1.2792	0.0030688	0.037805	0.54317	-0.88054
QueryMZ	MetlinMass	Adducts	MID	Common_name	Annotation
495.3258	496.312	M-H	58307	Postin	Endogenous;Food
495.3258	496.304	M-H	95740	(3b,16b,20R)-Pregn-5-ene-3,16,20-triol 3-glucoside	Endogenous;Food;TCM Ingredients
NEG	502.293	5.32	0.0010417	0.031067	2.1232	1.0863	0.36692	0.71688	1.2503	0.32226	0.58424	0.78446	1.213	0.27864	0.084892	0.24255	0.69088	-0.53349	0.00046405	0.0079685	0.32539	-1.6198	0.04686	0.17791	0.55258	-0.85575	0.10447	0.29951	0.56954	-0.81213
QueryMZ	MetlinMass	Adducts	MID	Common_name	Annotation
502.2927	503.301	M-H	62272	LysoPE(0:0/20:3(11Z,14Z,17Z))	Endogenous;Food
502.2927	503.301	M-H	62273	LysoPE(0:0/20:3(5Z,8Z,11Z))	Endogenous;Food
502.2927	503.301	M-H	62274	LysoPE(0:0/20:3(8Z,11Z,14Z))	Endogenous;Food
502.2927	503.301	M-H	62299	LysoPE(20:3(11Z,14Z,17Z)/0:0)	Endogenous;Food
502.2927	503.301	M-H	62300	LysoPE(20:3(5Z,8Z,11Z)/0:0)	Endogenous;Food
502.2927	503.301	M-H	62301	LysoPE(20:3(8Z,11Z,14Z)/0:0)	Endogenous;Food
502.2927	503.301	M-H	77688	PE(20:3(8Z,11Z,14Z)/0:0)	Endogenous;Food
502.2927	503.301	M-H	62301	LysoPE(20:3(8Z,11Z,14Z)/0:0)	Endogenous;Food
NEG	799.532	8.32	0.0010912	0.031754	0.71996	-0.47402	0.38499	0.72743	0.92141	-0.11808	0.1271	0.32775	0.80887	-0.30601	0.00052721	0.0072278	0.5473	-0.8696	0.042267	0.14567	0.76018	-0.39558	0.013082	0.090037	0.59398	-0.75152	0.14262	0.36188	0.67662	-0.56358
QueryMZ	MetlinMass	Adducts	MID	Common_name	Annotation
799.5316	800.557	M-H	61881	PG(18:0/20:3(5Z,8Z,11Z))	Endogenous;Food
799.5316	800.557	M-H	61882	PG(18:0/20:3(8Z,11Z,14Z))	Endogenous;Food
799.5316	800.492	M-H	87032	Majoroside F2	Endogenous;Food;Plant;TCM Ingredients
799.5316	800.492	M-H	87049	Majoroside F4	Endogenous;Food;Plant;TCM Ingredients
799.5316	800.492	M-H	87255	Majoroside F3	Endogenous;Food
799.5316	800.492	M-H	67293	Ginsenoside Rf	Endogenous;Food;Plant;TCM Ingredients
799.5316	800.492	M-H	90372	Momordicoside C	Endogenous;Food;TCM Ingredients
799.5316	800.492	M-H	67294	Ginsenoside Rg1	Endogenous;Food;Plant;TCM Ingredients
799.5316	800.492	M-H	94924	Ginsenoside A1	Endogenous;Food;TCM Ingredients
799.5316	800.492	M-H	95862	Ginsenoside Ia	Endogenous;Food;Plant;TCM Ingredients
799.5316	800.536	M-H	81951	PA(22:2(13Z,16Z)/22:6(4Z,7Z,10Z,13Z,16Z,19Z))	Endogenous;Food
799.5316	800.536	M-H	81981	PA(22:4(7Z,10Z,13Z,16Z)/22:4(7Z,10Z,13Z,16Z))	Endogenous;Food
799.5316	800.536	M-H	82009	PA(22:6(4Z,7Z,10Z,13Z,16Z,19Z)/22:2(13Z,16Z))	Endogenous;Food
799.5316	800.557	M-H	79366	PG(20:1(11Z)/18:2(9Z,12Z))	Endogenous;Food
799.5316	800.492	M-H	87032	Majoroside F2	Endogenous;Food;Plant;TCM Ingredients
799.5316	800.492	M-H	87049	Majoroside F4	Endogenous;Food;Plant;TCM Ingredients
799.5316	800.492	M-H	87255	Majoroside F3	Endogenous;Food
799.5316	800.492	M-H	90372	Momordicoside C	Endogenous;Food;TCM Ingredients
799.5316	800.492	M-H	95862	Ginsenoside Ia	Endogenous;Food;Plant;TCM Ingredients
799.5316	800.492	M-H	67293	Ginsenoside Rf	Endogenous;Food;Plant;TCM Ingredients
799.5316	800.492	M-H	67294	Ginsenoside Rg1	Endogenous;Food;Plant;TCM Ingredients
NEG	858.617	10.08	0.0011102	0.031754	0.62122	-0.68683	0.29249	0.65054	0.87591	-0.19114	0.025603	0.1116	0.79989	-0.32212	0.099619	0.26526	0.70172	-0.51102	0.9336	0.96335	1.1296	0.1758	0.3224	0.56954	0.80113	-0.31989	0.31532	0.58393	0.87727	-0.1889
QueryMZ	MetlinMass	Adducts	MID	Common_name	Annotation
858.6173	859.609	M-H	59767	PC(20:1(11Z)/22:6(4Z,7Z,10Z,13Z,16Z,19Z))	Endogenous;Food;Microbial Metabolites
858.6173	859.609	M-H	59798	PC(20:2(11Z,14Z)/22:5(4Z,7Z,10Z,13Z,16Z))	Endogenous;Food;Microbial Metabolites
858.6173	859.609	M-H	59799	PC(20:2(11Z,14Z)/22:5(7Z,10Z,13Z,16Z,19Z))	Endogenous;Food;Microbial Metabolites
858.6173	859.609	M-H	59830	PC(20:3(5Z,8Z,11Z)/22:4(7Z,10Z,13Z,16Z))	Endogenous;Food;Microbial Metabolites
858.6173	859.609	M-H	59862	PC(20:3(8Z,11Z,14Z)/22:4(7Z,10Z,13Z,16Z))	Endogenous;Food;Microbial Metabolites
858.6173	859.609	M-H	59960	PC(20:5(5Z,8Z,11Z,14Z,17Z)/22:2(13Z,16Z))	Endogenous;Food;Microbial Metabolites
858.6173	859.609	M-H	60055	PC(22:2(13Z,16Z)/20:5(5Z,8Z,11Z,14Z,17Z))	Endogenous;Food;Microbial Metabolites
858.6173	859.609	M-H	60084	PC(22:4(7Z,10Z,13Z,16Z)/20:3(5Z,8Z,11Z))	Endogenous;Food;Microbial Metabolites
858.6173	859.609	M-H	60085	PC(22:4(7Z,10Z,13Z,16Z)/20:3(8Z,11Z,14Z))	Endogenous;Food;Microbial Metabolites
858.6173	859.609	M-H	60116	PC(22:5(4Z,7Z,10Z,13Z,16Z)/20:2(11Z,14Z))	Endogenous;Food;Microbial Metabolites
858.6173	859.609	M-H	60149	PC(22:5(7Z,10Z,13Z,16Z,19Z)/20:2(11Z,14Z))	Endogenous;Food;Microbial Metabolites
858.6173	859.609	M-H	60181	PC(22:6(4Z,7Z,10Z,13Z,16Z,19Z)/20:1(11Z))	Endogenous;Food;Microbial Metabolites
NEG	264.895	3.62	0.0011249	0.031754	0.75541	-0.40466	0.54017	0.81873	0.95874	-0.060793	0.88017	0.94997	1.0074	0.010674	0.00093272	0.010787	0.69605	-0.52273	0.35243	0.55784	0.92142	-0.11807	0.016945	0.096664	0.72601	-0.46194	0.042133	0.16498	0.69092	-0.5334
QueryMZ	MetlinMass	Adducts	MID	Common_name	Annotation
NEG	638.354	5.96	0.0011394	0.031754	0.75328	-0.40875	0.020873	0.20372	0.78259	-0.35368	7.4049e-05	0.0026949	0.70567	-0.50293	0.013324	0.065035	0.54006	-0.88881	0.090836	0.25274	0.71694	-0.48007	0.092299	0.27771	0.69009	-0.53513	0.13183	0.34478	0.76531	-0.38588
QueryMZ	MetlinMass	Adducts	MID	Common_name	Annotation
NEG	190.05	0.48	0.001297	0.035562	1.4663	0.55215	0.89844	0.97283	1.0316	0.044822	0.066095	0.20846	1.2447	0.31583	0.0006079	0.0080111	1.5046	0.58934	0.78156	0.87215	1.0261	0.037189	0.016037	0.094863	1.4585	0.54452	0.15007	0.37148	1.2087	0.2735
QueryMZ	MetlinMass	Adducts	MID	Common_name	Annotation
190.05	191.058	M-H	2975	5-Hydroxyindoleacetic acid	Endogenous;Food;Plant;TCM Ingredients
190.05	191.095	M-H	58062	5-Methoxytryptophol	Endogenous;TCM Ingredients
190.05	191.106	M-H	58417	4-Hydroxydebrisoquine	Endogenous;Food
190.05	191.062	M-H	62466	N-Acetyl-DL-methionine	Cosmetic;Endogenous;Microbial Metabolites
190.05	191.091	M-H	86233	4-Hydroxycitrulline	Endogenous;Food;Plant;TCM Ingredients
190.05	191.069	M-H	68667	Carbendazim	Agricultural Chemicals;Cosmetic;Drug;Endogenous;Food;Toxins/Pollutant
190.05	191.043	M-H	96169	gamma-carboxyglutamic acid	Endogenous
190.05	191.106	M-H	73171	N'-Nitrosoanabasine	Endogenous
190.05	191.058	M-H	71253	5-Phenyl-1,3-oxazinane-2,4-dione	Drug Metabolite;Endogenous;Microbial Metabolites
190.05	191.091	M-H	86233	4-Hydroxycitrulline	Endogenous;Food;Plant;TCM Ingredients
NEG	501.281	5.11	0.0014274	0.038517	1.8678	0.90136	0.18663	0.52809	1.197	0.25936	0.05183	0.17306	1.4527	0.53873	0.61545	0.7678	0.93789	-0.092504	0.0070787	0.057095	0.50213	-0.99386	0.16591	0.38844	0.78357	-0.35187	0.073507	0.23603	0.64562	-0.63123
QueryMZ	MetlinMass	Adducts	MID	Common_name	Annotation
501.2805	502.257	M-H	86914	Cavipetin B	Endogenous;Food;TCM Ingredients
501.2805	502.257	M-H	87608	28-Hydroxywithanolide E	Endogenous;Food
501.2805	502.257	M-H	89633	Withaperuvin G	Endogenous;Food
501.2805	502.257	M-H	89687	4beta-Hydroxywithanolide E	Endogenous;Food;TCM Ingredients
501.2805	502.257	M-H	89859	Ixocarpalactone B	Endogenous;Food
501.2805	502.257	M-H	89907	Withaperuvin F	Endogenous;Food
501.2805	502.329	M-H	90016	Medicagenic acid	Endogenous;Food;TCM Ingredients
501.2805	502.329	M-H	90101	Esculentic acid (Phytolacca)	Endogenous;Food;TCM Ingredients
501.2805	502.329	M-H	90150	22-Deoxoisocucurbitacin D	Endogenous;Food;TCM Ingredients
501.2805	502.329	M-H	90151	22-Deoxocucurbitacin D	Endogenous;Food;TCM Ingredients
501.2805	502.329	M-H	91001	Ganolucidic acid B	Endogenous;Food;Plant;TCM Ingredients
501.2805	502.241	M-H	92803	Eriojaposide A	Endogenous;Food;TCM Ingredients
501.2805	502.241	M-H	95150	3-Oxo-alpha-ionol 9-[apiosyl-(1->6)-glucoside]	Endogenous;Food
501.2805	502.257	M-H	87608	28-Hydroxywithanolide E	Endogenous;Food
501.2805	502.257	M-H	89633	Withaperuvin G	Endogenous;Food
501.2805	502.257	M-H	89859	Ixocarpalactone B	Endogenous;Food
501.2805	502.329	M-H	90101	Esculentic acid (Phytolacca)	Endogenous;Food;TCM Ingredients
501.2805	502.329	M-H	91001	Ganolucidic acid B	Endogenous;Food;Plant;TCM Ingredients
NEG	704.335	5.95	0.0015009	0.039867	0.80681	-0.3097	0.20106	0.55025	0.89481	-0.16035	0.00049178	0.0089344	0.76076	-0.39449	0.011356	0.059221	0.55085	-0.86027	0.052156	0.16921	0.68275	-0.55057	0.038184	0.1568	0.6156	-0.69993	0.083726	0.25785	0.72408	-0.46578
QueryMZ	MetlinMass	Adducts	MID	Common_name	Annotation
NEG	510.346	5.96	0.0016918	0.043647	0.68627	-0.54314	0.025283	0.21278	0.744	-0.42663	0.0032981	0.030403	0.65163	-0.61787	0.004307	0.033587	0.34418	-1.5388	0.018545	0.090077	0.50152	-0.99563	0.016308	0.094945	0.46261	-1.1121	0.029973	0.13335	0.52818	-0.9209
QueryMZ	MetlinMass	Adducts	MID	Common_name	Annotation
NEG	1160.71	5.96	0.0016945	0.043647	0.69476	-0.52541	0.032605	0.23789	0.73099	-0.45208	4.2067e-05	0.0023984	0.59938	-0.73847	0.0073374	0.044708	0.2764	-1.8552	0.021805	0.099378	0.39784	-1.3298	0.022982	0.11424	0.37812	-1.4031	0.03241	0.13959	0.46115	-1.1167
QueryMZ	MetlinMass	Adducts	MID	Common_name	Annotation
NEG	883.533	12.16	0.0017243	0.043751	0.46756	-1.0968	0.51374	0.80271	0.84338	-0.24575	0.34256	0.59303	0.7906	-0.33897	0.35743	0.55847	0.7709	-0.37538	0.0015558	0.019886	1.6488	0.72138	0.59636	0.78712	0.91406	-0.12964	0.94862	0.99182	0.97508	-0.036412
QueryMZ	MetlinMass	Adducts	MID	Common_name	Annotation
883.5331	884.541	M-H	61180	PI(16:0/22:5(4Z,7Z,10Z,13Z,16Z))	Endogenous;Food;Microbial Metabolites
883.5331	884.541	M-H	61181	PI(16:0/22:5(7Z,10Z,13Z,16Z,19Z))	Endogenous;Food;Microbial Metabolites
883.5331	884.541	M-H	61189	PI(16:2(9Z,12Z)/22:3(10Z,13Z,16Z))	Endogenous;Food;Microbial Metabolites
883.5331	884.541	M-H	61217	PI(18:1(11Z)/20:4(5Z,8Z,11Z,14Z))	Endogenous;Food;Microbial Metabolites
883.5331	884.541	M-H	61218	PI(18:1(11Z)/20:4(8Z,11Z,14Z,17Z))	Endogenous;Food;Microbial Metabolites
883.5331	884.541	M-H	61229	PI(18:1(9Z)/20:4(5Z,8Z,11Z,14Z))	Endogenous;Food;Microbial Metabolites
883.5331	884.541	M-H	61230	PI(18:1(9Z)/20:4(8Z,11Z,14Z,17Z))	Endogenous;Food;Microbial Metabolites
883.5331	884.541	M-H	61239	PI(18:2(9Z,12Z)/20:3(5Z,8Z,11Z))	Endogenous;Food;Microbial Metabolites
883.5331	884.541	M-H	61240	PI(18:2(9Z,12Z)/20:3(8Z,11Z,14Z))	Endogenous;Food;Microbial Metabolites
883.5331	884.541	M-H	61268	PI(20:3(5Z,8Z,11Z)/18:2(9Z,12Z))	Endogenous;Food;Microbial Metabolites
883.5331	884.541	M-H	61275	PI(20:3(8Z,11Z,14Z)/18:2(9Z,12Z))	Endogenous;Food;Microbial Metabolites
883.5331	884.541	M-H	61280	PI(20:4(5Z,8Z,11Z,14Z)/18:1(11Z))	Endogenous;Food;Microbial Metabolites
883.5331	884.541	M-H	61281	PI(20:4(5Z,8Z,11Z,14Z)/18:1(9Z))	Endogenous;Food;Microbial Metabolites
883.5331	884.541	M-H	61286	PI(20:4(8Z,11Z,14Z,17Z)/18:1(11Z))	Endogenous;Food;Microbial Metabolites
883.5331	884.541	M-H	61287	PI(20:4(8Z,11Z,14Z,17Z)/18:1(9Z))	Endogenous;Food;Microbial Metabolites
883.5331	884.541	M-H	61293	PI(22:3(10Z,13Z,16Z)/16:2(9Z,12Z))	Endogenous;Food;Microbial Metabolites
883.5331	884.541	M-H	61301	PI(22:5(4Z,7Z,10Z,13Z,16Z)/16:0)	Endogenous;Food;Microbial Metabolites
883.5331	884.541	M-H	61303	PI(22:5(7Z,10Z,13Z,16Z,19Z)/16:0)	Endogenous;Food;Microbial Metabolites
NEG	823.533	8.2	0.0018465	0.045792	0.7336	-0.44693	0.28283	0.64538	0.87965	-0.18501	0.058094	0.18883	0.78084	-0.3569	0.015182	0.071101	0.69525	-0.52441	0.59486	0.76035	0.94771	-0.077479	0.46883	0.6973	0.79037	-0.3394	0.59604	0.81961	0.89038	-0.16751
QueryMZ	MetlinMass	Adducts	MID	Common_name	Annotation
823.5334	824.557	M-H	61884	PG(18:0/22:5(4Z,7Z,10Z,13Z,16Z))	Endogenous;Food
823.5334	824.557	M-H	61885	PG(18:0/22:5(7Z,10Z,13Z,16Z,19Z))	Endogenous;Food
823.5334	824.557	M-H	61897	PG(18:1(11Z)/22:4(7Z,10Z,13Z,16Z))	Endogenous;Food
823.5334	824.557	M-H	61912	PG(18:1(9Z)/22:4(7Z,10Z,13Z,16Z))	Endogenous;Food
823.5334	824.557	M-H	79464	PG(20:4(5Z,8Z,11Z,14Z)/20:1(11Z))	Endogenous;Food
NEG	303.916	0.32	0.0018799	0.045792	0.72804	-0.45792	0.1999	0.54855	0.89327	-0.16284	0.89436	0.95541	1.027	0.038483	0.0022685	0.021665	0.65487	-0.61072	0.39566	0.60325	0.89951	-0.1528	0.058466	0.20733	0.73312	-0.44788	0.011294	0.081405	0.63763	-0.6492
QueryMZ	MetlinMass	Adducts	MID	Common_name	Annotation
NEG	637.351	5.96	0.0018856	0.045792	0.76876	-0.3794	0.059957	0.29289	0.82554	-0.27659	0.00020708	0.0050972	0.69905	-0.51652	0.0063144	0.041768	0.44484	-1.1687	0.026165	0.11057	0.57864	-0.78925	0.023462	0.11561	0.53884	-0.89206	0.047631	0.17603	0.63634	-0.65213
QueryMZ	MetlinMass	Adducts	MID	Common_name	Annotation
637.3514	638.367	M-H	94914	26-Glucosyl-1,3,11,22-tetrahydroxyergosta-5,24-dien-26-oate	Endogenous;Food;TCM Ingredients
637.3514	638.395	M-H	81288	PA(14:1(9Z)/18:4(6Z,9Z,12Z,15Z))	Endogenous;Food
637.3514	638.395	M-H	81592	PA(18:4(6Z,9Z,12Z,15Z)/14:1(9Z))	Endogenous;Food
637.3514	638.367	M-H	94914	26-Glucosyl-1,3,11,22-tetrahydroxyergosta-5,24-dien-26-oate	Endogenous;Food;TCM Ingredients
NEG	125.873	0.16	0.001976	0.04709	0.82799	-0.27232	0.65542	0.86844	0.9768	-0.033863	0.84876	0.93212	1.009	0.012933	0.34679	0.55252	0.9504	-0.073396	0.0096779	0.06487	1.1478	0.19892	0.65329	0.8344	0.97297	-0.039532	0.24209	0.50007	0.94192	-0.086329
QueryMZ	MetlinMass	Adducts	MID	Common_name	Annotation
NEG	1159.71	5.96	0.0019944	0.04709	0.67825	-0.56012	0.030732	0.23446	0.7353	-0.44359	0.00032196	0.0062912	0.61434	-0.7029	0.0071022	0.044388	0.2684	-1.8975	0.020112	0.09393	0.39573	-1.3374	0.018396	0.099912	0.36502	-1.454	0.026979	0.13063	0.43689	-1.1946
QueryMZ	MetlinMass	Adducts	MID	Common_name	Annotation
NEG	916.533	8.24	0.0020971	0.048699	0.5952	-0.74854	0.063326	0.29995	0.76144	-0.3932	0.00025372	0.0055855	0.53598	-0.89974	0.0023293	0.021877	0.41083	-1.2834	0.091473	0.25327	0.69023	-0.53484	0.018968	0.10172	0.53955	-0.89018	0.15112	0.37268	0.7665	-0.38365
QueryMZ	MetlinMass	Adducts	MID	Common_name	Annotation
NEG	417.118	2.68	0.0021198	0.048699	0.21666	-2.2065	0.041148	0.256	0.45028	-1.1511	0.059859	0.1924	0.54295	-0.88112	1.1437e-06	7.4783e-05	0.024727	-5.3378	0.036623	0.13341	0.11413	-3.1313	0.0024552	0.036934	0.054914	-4.1867	9.1007e-05	0.0042976	0.045542	-4.4567
QueryMZ	MetlinMass	Adducts	MID	Common_name	Annotation
417.1181	418.09	M-H	86135	Kaempferol 3-O-arabinoside	Endogenous;Food;Plant
417.1181	418.09	M-H	86311	Kaempferol 3-alpha-L-arabinofuranoside	Endogenous;Food;Plant;TCM Ingredients
417.1181	418.142	M-H	49351	Isocyclomorusin	Endogenous;Food;Plant
417.1181	418.126	M-H	51756	Natsudaidain	Endogenous;Food;Plant;TCM Ingredients
417.1181	418.126	M-H	51755	5-Hydroxy-3,6,7,8,3'4'-hexamethoxyflavone	Endogenous;Food;Plant;TCM Ingredients
417.1181	418.142	M-H	49341	Cyclomorusin	Endogenous;Food;Plant;TCM Ingredients
417.1181	418.148	M-H	87604	Oleoside dimethyl ester	Endogenous;Food;Plant;TCM Ingredients
417.1181	418.126	M-H	96089	Equol 4'-O-glucuronide	Endogenous;Food;Plant
417.1181	418.126	M-H	96090	Equol 7-O-glucuronide	Endogenous;Food;Plant
417.1181	418.09	M-H	86135	Kaempferol 3-O-arabinoside	Endogenous;Food;Plant
417.1181	418.09	M-H	86311	Kaempferol 3-alpha-L-arabinofuranoside	Endogenous;Food;Plant;TCM Ingredients
417.1181	418.148	M-H	87604	Oleoside dimethyl ester	Endogenous;Food;Plant;TCM Ingredients
417.1181	418.126	M-H	96089	Equol 4'-O-glucuronide	Endogenous;Food;Plant
NEG	571.367	5.96	0.0021837	0.049496	0.65431	-0.61194	0.058371	0.28904	0.76587	-0.38483	0.0020254	0.024401	0.65838	-0.60301	0.0040559	0.032371	0.37818	-1.4028	0.029094	0.11832	0.57799	-0.7909	0.016821	0.096609	0.4938	-1.018	0.027123	0.13063	0.57442	-0.79983
QueryMZ	MetlinMass	Adducts	MID	Common_name	Annotation
571.367	572.371	M-H	61663	Vitamin D2 3-glucuronide	Drug Metabolite;Endogenous;Food;Microbial Metabolites
571.367	572.408	M-H	88755	22-Angeloylbarringtogenol C	Endogenous;Food
571.367	572.371	M-H	88970	Ganoderic acid W	Endogenous;Food;Plant;TCM Ingredients
571.367	572.408	M-H	88981	(3b,5a,22E,24S)-Stigmasta-7,22,25-trien-3-ol 3-glucoside	Endogenous;Food
571.367	572.371	M-H	90629	Ganoderic acid Ma	Endogenous;Food
571.367	572.408	M-H	88755	22-Angeloylbarringtogenol C	Endogenous;Food
571.367	572.371	M-H	88970	Ganoderic acid W	Endogenous;Food;Plant;TCM Ingredients
571.367	572.408	M-H	88981	(3b,5a,22E,24S)-Stigmasta-7,22,25-trien-3-ol 3-glucoside	Endogenous;Food
571.367	572.371	M-H	90629	Ganoderic acid Ma	Endogenous;Food
NEG	849.547	8.24	0.0023898	0.052761	0.51155	-0.96706	0.050913	0.27327	0.69297	-0.52913	7.8819e-05	0.0026949	0.46411	-1.1074	0.00055256	0.0074507	0.31107	-1.6847	0.079052	0.22739	0.60809	-0.71764	0.012721	0.088701	0.44889	-1.1556	0.048545	0.17748	0.67024	-0.57725
QueryMZ	MetlinMass	Adducts	MID	Common_name	Annotation
849.5469	850.508	M-H	90064	Hebevinoside XI	Endogenous;Food;Plant;TCM Ingredients
849.5469	850.508	M-H	91167	Hebevinoside V	Endogenous;Food;Plant;TCM Ingredients
849.5469	850.508	M-H	90064	Hebevinoside XI	Endogenous;Food;Plant;TCM Ingredients
849.5469	850.508	M-H	91167	Hebevinoside V	Endogenous;Food;Plant;TCM Ingredients
NEG	593.477	7.59	0.002463	0.05368	0.53617	-0.89924	1.1085e-05	0.0053365	4.4025	2.1383	0.42654	0.66722	2.8212	1.4963	0.013223	0.064967	2.0074	1.0054	7.4111e-05	0.0023331	3.744	1.9046	0.006517	0.061893	0.45597	-1.133	0.76389	0.89803	0.71154	-0.49097
QueryMZ	MetlinMass	Adducts	MID	Common_name	Annotation
593.4775	594.522	M-H	58656	DG(14:0/20:1(11Z)/0:0)	Endogenous;Food
593.4775	594.522	M-H	58684	DG(14:1(9Z)/20:0/0:0)	Endogenous;Food
593.4775	594.522	M-H	4682	DG(16:0/18:1(11Z)/0:0)	Endogenous;Food;Microbial Metabolites
593.4775	594.522	M-H	4260	DG(16:0/18:1(9Z)/0:0)	Endogenous;Food;Microbial Metabolites
593.4775	594.522	M-H	4278	DG(16:1(9Z)/18:0/0:0)[iso2]	Endogenous;Food;Microbial Metabolites
593.4775	594.522	M-H	58755	DG(18:0/16:1(9Z)/0:0)	Endogenous;Food;Microbial Metabolites
593.4775	594.522	M-H	58767	DG(18:1(11Z)/16:0/0:0)	Endogenous;Food
593.4775	594.522	M-H	4259	DG(18:1(9Z)/16:0/0:0)	Endogenous;Food;Microbial Metabolites
593.4775	594.522	M-H	58911	DG(20:1(11Z)/14:0/0:0)	Endogenous;Food
593.4775	594.45	M-H	87646	Squamocin B	Endogenous;Food;TCM Ingredients
593.4775	594.45	M-H	87651	Mosin C	Endogenous;Food;TCM Ingredients
593.4775	594.45	M-H	90548	Squamolinone	Endogenous;Food
593.4775	594.45	M-H	91125	Squamone	Endogenous;Food;TCM Ingredients
593.4775	594.45	M-H	91427	6-Hydroxydesacetyluvaricin (incorr.)	Endogenous;Food
593.4775	594.45	M-H	91960	Muricin F	Endogenous;Food
593.4775	594.45	M-H	91961	Muricin G	Endogenous;Food
593.4775	594.45	M-H	95182	Parviflorin	Endogenous;Food;TCM Ingredients
593.4775	594.45	M-H	95633	Reticulacinone	Endogenous;Food;TCM Ingredients
593.4775	594.45	M-H	95821	Atemoyacin B	Endogenous;Food
593.4775	594.45	M-H	95908	cis-Annonacin-10-one	Endogenous;Food
593.4775	594.45	M-H	87651	Mosin C	Endogenous;Food;TCM Ingredients
593.4775	594.45	M-H	95633	Reticulacinone	Endogenous;Food;TCM Ingredients
593.4775	594.45	M-H	95908	cis-Annonacin-10-one	Endogenous;Food
NEG	1044.61	5.11	0.0026911	0.05709	1.7447	0.80296	0.09377	0.36986	0.78784	-0.34402	0.17549	0.40369	0.84632	-0.24072	0.00078786	0.0096356	0.28438	-1.8141	0.00017105	0.0039295	0.163	-2.617	0.0056813	0.05715	0.36097	-1.4701	0.0028354	0.036007	0.33602	-1.5734
QueryMZ	MetlinMass	Adducts	MID	Common_name	Annotation
NEG	172.991	1.03	0.0027202	0.05709	0.26359	-1.9236	0.049352	0.27245	0.48364	-1.048	0.00030139	0.0061203	0.27248	-1.8758	7.2741e-05	0.0016455	0.097013	-3.3657	0.52246	0.70771	0.36804	-1.4421	0.41681	0.64827	0.20059	-2.3177	0.022597	0.11784	0.35604	-1.4899
QueryMZ	MetlinMass	Adducts	MID	Common_name	Annotation
172.9913	174.016	M-H	3771	trans-Aconitate	Endogenous;Food;Microbial Metabolites;Plant;TCM Ingredients
172.9913	174.016	M-H	3300	Aconitic acid	Endogenous;Food;Microbial Metabolites;Plant;TCM Ingredients
172.9913	174.016	M-H	3300	Aconitic acid	Endogenous;Food;Microbial Metabolites;Plant;TCM Ingredients
172.9913	174.016	M-H	3771	trans-Aconitate	Endogenous;Food;Microbial Metabolites;Plant;TCM Ingredients
172.9913	174.016	M-H	342	Dehydroascorbic acid	Endogenous;Food;Microbial Metabolites;Plant;TCM Ingredients
172.9913	174.032	M-H	87072	1-Oxo-1H-2-benzopyran-3-carboxaldehyde	Endogenous;Food;Plant;TCM Ingredients
172.9913	174.032	M-H	44061	JUGLONE	Drug;Endogenous;Food;Plant;TCM Ingredients
172.9913	173.999	M-H	1828	Phenyl sulfate	Endogenous;Microbial Metabolites
172.9913	174.016	M-H	342	Dehydroascorbic acid	Endogenous;Food;Microbial Metabolites;Plant;TCM Ingredients
NEG	584.355	4.45	0.0027716	0.05746	0.55739	-0.84325	0.067865	0.31135	0.59612	-0.74631	0.0020596	0.024484	0.46452	-1.1062	1.5465e-05	0.0005975	0.11293	-3.1465	0.0001433	0.0034311	0.20261	-2.3032	0.0060974	0.058895	0.18944	-2.4002	0.0010903	0.021552	0.24311	-2.0403
QueryMZ	MetlinMass	Adducts	MID	Common_name	Annotation
584.3554	585.345	M-H	87041	Janthitrem B	Endogenous;Food;Plant;TCM Ingredients;Toxins/Pollutant
NEG	606.408	7.91	0.0028551	0.058477	1.9794	0.98505	0.81433	0.94875	1.0458	0.064665	0.00027008	0.0056683	0.5467	-0.87118	0.21876	0.42796	0.80236	-0.31768	0.0059292	0.052498	0.40536	-1.3027	0.517	0.72219	0.76719	-0.38234	0.14389	0.36293	1.4676	0.5535
QueryMZ	MetlinMass	Adducts	MID	Common_name	Annotation
606.4079	607.458	M-H	40323	PC(24:0/0:0)	Endogenous;Food;Microbial Metabolites
606.4079	607.458	M-H	40324	PC(24:0/0:0)[U]	Endogenous;Food;Microbial Metabolites
606.4079	607.458	M-H	61714	LysoPC(24:0)	Endogenous;Food;Microbial Metabolites
606.4079	607.458	M-H	40323	PC(24:0/0:0)	Endogenous;Food;Microbial Metabolites
606.4079	607.458	M-H	40324	PC(24:0/0:0)[U]	Endogenous;Food;Microbial Metabolites
NEG	229.138	3.64	0.0028964	0.058618	0.47493	-1.0742	0.074817	0.32866	0.7188	-0.47633	0.054894	0.18085	0.65339	-0.61399	0.0018715	0.018687	0.42654	-1.2292	0.73412	0.84496	0.89812	-0.15502	0.006359	0.061075	0.5934	-0.75292	0.13139	0.3447	0.65281	-0.61526
QueryMZ	MetlinMass	Adducts	MID	Common_name	Annotation
229.1381	230.152	M-H	5596	Dodecanedioic acid	Cosmetic;Endogenous;Food;TCM Ingredients
229.1381	230.127	M-H	85782	Hydroxyprolyl-Valine	Endogenous
229.1381	230.163	M-H	85825	Isoleucyl-Valine	Endogenous
229.1381	230.163	M-H	85844	Leucyl-Valine	Endogenous
229.1381	230.127	M-H	86020	Valyl-Hydroxyproline	Endogenous
229.1381	230.163	M-H	86022	Valyl-Isoleucine	Endogenous
229.1381	230.163	M-H	86023	Valyl-Leucine	Endogenous
229.1381	230.131	M-H	89102	8,12-Epoxy-4(15),7,11-eudesmatrien-1-one	Endogenous;Food
229.1381	230.131	M-H	90714	(2E,8Z)-Decadiene-4,6-diyn-1-yl 3-methylbutanoate	Endogenous;Food;TCM Ingredients
229.1381	230.188	M-H	91289	3-[[5-Methyl-2-(1-methylethyl)cyclohexyl]oxy]-1,2-propanediol	Cosmetic;Endogenous;Food
229.1381	230.131	M-H	71449	Curzerenone	Endogenous;Food;TCM Ingredients
229.1381	230.131	M-H	71463	Furanodienone	Endogenous;Food;Plant;TCM Ingredients
229.1381	230.152	M-H	70124	Diisopropyl adipate	Cosmetic;Endogenous;Food
229.1381	230.152	M-H	95986	Dipropyl hexanedioate	Cosmetic;Endogenous;Food
229.1381	230.187	M-H	96188	n1,n8-diacetylspermidine	Endogenous
229.1381	230.188	M-H	74550	3-hydroxy-tridecanoic acid	Endogenous;Food
229.1381	230.131	M-H	89102	8,12-Epoxy-4(15),7,11-eudesmatrien-1-one	Endogenous;Food
229.1381	230.131	M-H	71449	Curzerenone	Endogenous;Food;TCM Ingredients
229.1381	230.131	M-H	71463	Furanodienone	Endogenous;Food;Plant;TCM Ingredients
229.1381	230.187	M-H	96188	n1,n8-diacetylspermidine	Endogenous
NEG	509.343	5.96	0.0030294	0.059278	0.7304	-0.45325	0.030302	0.23446	0.75873	-0.39834	0.00080698	0.012471	0.67967	-0.55708	0.0051071	0.036208	0.36453	-1.4559	0.019562	0.092378	0.49908	-1.0026	0.021755	0.11047	0.48045	-1.0576	0.028059	0.13158	0.53633	-0.89881
QueryMZ	MetlinMass	Adducts	MID	Common_name	Annotation
509.3434	510.335	M-H	92699	Ganodermic acid TQ	Endogenous;Food;TCM Ingredients
509.3434	510.335	M-H	92699	Ganodermic acid TQ	Endogenous;Food;TCM Ingredients
NEG	641.294	5.96	0.0032462	0.06271	0.7953	-0.33042	0.010262	0.14652	0.79719	-0.327	0.00011277	0.0034233	0.69607	-0.5227	0.0048594	0.035303	0.40836	-1.2921	0.017869	0.088304	0.51347	-0.96165	0.019707	0.10469	0.51225	-0.96507	0.037539	0.1534	0.58667	-0.76937
QueryMZ	MetlinMass	Adducts	MID	Common_name	Annotation
641.2938	642.325	M-H	85008	Steviobioside	Endogenous;Food;Plant;TCM Ingredients
NEG	558.332	5.96	0.0033957	0.06321	0.79111	-0.33806	0.040071	0.256	0.8253	-0.277	0.0015441	0.020507	0.72642	-0.46111	0.008722	0.048935	0.42831	-1.2233	0.02538	0.10932	0.5414	-0.88523	0.023966	0.11708	0.51897	-0.94628	0.043408	0.16848	0.58961	-0.76217
QueryMZ	MetlinMass	Adducts	MID	Common_name	Annotation
558.3323	559.387	M-H	89470	gamma-Chaconine	Endogenous;Food;Plant;TCM Ingredients
NEG	399.184	3.68	0.0035021	0.06321	0.46579	-1.1023	1.0929e-06	0.00099172	0.12019	-3.0566	0.0060343	0.042042	0.2973	-1.75	4.8675e-05	0.0013346	0.10235	-3.2884	0.0040645	0.04054	0.21974	-2.1861	0.5414	0.74224	0.85159	-0.23177	0.63282	0.8322	0.34428	-1.5384
QueryMZ	MetlinMass	Adducts	MID	Common_name	Annotation
399.1836	400.152	M-H	86557	Hemiariensin	Endogenous;Food;TCM Ingredients
399.1836	400.225	M-H	86765	Nevskin	Endogenous;Food;Plant;TCM Ingredients
399.1836	400.173	M-H	87325	Corchoionoside B	Endogenous;Food
399.1836	400.189	M-H	90951	Melleolide	Endogenous;Food;Plant;TCM Ingredients
399.1836	400.225	M-H	91055	Lucidone B	Endogenous;Food;Plant;TCM Ingredients
399.1836	400.21	M-H	91863	Cincassiol B	Endogenous;Food
399.1836	400.189	M-H	93531	Armillaritin	Endogenous;Food;TCM Ingredients
399.1836	400.165	M-H	95692	3b-Hydroxy-6b-(3-chloro-2-hydroxy-2-methylbutanoyloxy)-7(11)-eremophilen-12,8b-olide	Endogenous;Food
399.1836	400.152	M-H	86557	Hemiariensin	Endogenous;Food;TCM Ingredients
399.1836	400.173	M-H	87325	Corchoionoside B	Endogenous;Food
399.1836	400.225	M-H	91055	Lucidone B	Endogenous;Food;Plant;TCM Ingredients
399.1836	400.189	M-H	93531	Armillaritin	Endogenous;Food;TCM Ingredients
399.1836	400.165	M-H	95692	3b-Hydroxy-6b-(3-chloro-2-hydroxy-2-methylbutanoyloxy)-7(11)-eremophilen-12,8b-olide	Endogenous;Food
NEG	1149.68	5.96	0.0038299	0.064464	0.68821	-0.53908	0.10579	0.39701	0.8326	-0.26431	0.0071107	0.045645	0.70761	-0.49897	0.0031745	0.027675	0.39866	-1.3268	0.030679	0.12257	0.57926	-0.78771	0.010591	0.081808	0.47881	-1.0625	0.027031	0.13063	0.56338	-0.82781
QueryMZ	MetlinMass	Adducts	MID	Common_name	Annotation
NEG	640.291	5.96	0.0038927	0.064878	0.79949	-0.32284	0.084558	0.35397	0.85702	-0.22259	0.0010736	0.0156	0.7451	-0.4245	0.0059891	0.040084	0.41653	-1.2635	0.017322	0.087379	0.521	-0.94065	0.014417	0.093551	0.48602	-1.0409	0.026792	0.13063	0.55903	-0.83899
QueryMZ	MetlinMass	Adducts	MID	Common_name	Annotation
640.291	641.341	M-H	6693	(3a,5b,7a,12a)-24-[(carboxymethyl)amino]-1,12-dihydroxy-24-oxocholan-3-yl-b-D-Glucopyranosiduronic a	Endogenous;Food
NEG	636.348	5.96	0.0043091	0.068669	0.7715	-0.37427	0.052792	0.27647	0.82263	-0.28168	0.0059534	0.041821	0.7593	-0.39726	0.0090736	0.050409	0.45179	-1.1463	0.031291	0.12268	0.58561	-0.77199	0.026025	0.12354	0.54921	-0.86458	0.037122	0.15207	0.59501	-0.74901
QueryMZ	MetlinMass	Adducts	MID	Common_name	Annotation
636.3483	637.398	M-H	90572	Avenestergenin A1	Endogenous;Food;TCM Ingredients
636.3483	637.398	M-H	90572	Avenestergenin A1	Endogenous;Food;TCM Ingredients
NEG	226.018	2.45	0.0043221	0.068669	0.34261	-1.5454	0.01855	0.19229	0.31641	-1.6601	0.19465	0.4303	0.70246	-0.50952	0.00035556	0.0053022	0.054037	-4.2099	0.0096924	0.06487	0.15772	-2.6645	0.3975	0.63154	0.17078	-2.5498	0.0023744	0.032624	0.076926	-3.7004
QueryMZ	MetlinMass	Adducts	MID	Common_name	Annotation
226.0178	227.043	M-H	58545	5-(2'-Carboxyethyl)-4,6-Dihydroxypicolinate	Endogenous;Food
226.0178	227.058	M-H	86807	Lansine	Endogenous;Food;Plant;TCM Ingredients
226.0178	227.058	M-H	86887	Mukeic acid	Endogenous;Food;TCM Ingredients
226.0178	227.043	M-H	58545	5-(2'-Carboxyethyl)-4,6-Dihydroxypicolinate	Endogenous;Food
NEG	595.379	6.09	0.0044066	0.069363	0.61836	-0.69348	0.038225	0.25555	0.6569	-0.60625	0.0028026	0.028875	0.56467	-0.82452	0.00069025	0.008692	0.226	-2.1456	0.0041755	0.041269	0.36549	-1.4521	0.0083171	0.072138	0.34404	-1.5393	0.008193	0.06999	0.40024	-1.3211
QueryMZ	MetlinMass	Adducts	MID	Common_name	Annotation
595.379	596.387	M-H	3671	Astaxanthin	Cosmetic;Endogenous;Food;Plant;TCM Ingredients
595.379	596.357	M-H	58221	L-Urobilinogen	Endogenous;Food
595.379	596.392	M-H	86181	Asparagoside B	Endogenous;Food;TCM Ingredients
595.379	596.383	M-H	93237	3'-N-Acetyl-4'-O-(10,12-octadecadienoyl)fusarochromanone	Endogenous;Food
595.379	596.387	M-H	93696	Capsorubinidione	Endogenous;Food
595.379	596.387	M-H	93726	(3'RS,3'SR)-Astaxanthin	Endogenous;Food;Plant;TCM Ingredients
595.379	596.392	M-H	86181	Asparagoside B	Endogenous;Food;TCM Ingredients
595.379	596.387	M-H	93696	Capsorubinidione	Endogenous;Food
NEG	560.331	5.96	0.0045732	0.069568	0.75998	-0.39596	0.0095183	0.13949	0.77676	-0.36445	0.00020575	0.0050972	0.71973	-0.47447	0.0041466	0.03294	0.44097	-1.1812	0.028357	0.11622	0.58024	-0.78528	0.025729	0.12321	0.5677	-0.81679	0.033393	0.14086	0.61269	-0.70677
QueryMZ	MetlinMass	Adducts	MID	Common_name	Annotation
NEG	546.877	0.34	0.0046219	0.069568	1.1746	0.23212	0.50909	0.80037	1.0391	0.055384	0.57561	0.78227	1.0332	0.047124	0.0017643	0.01796	0.69134	-0.53253	8.1941e-05	0.0023995	0.5886	-0.76465	0.0011337	0.027145	0.6653	-0.58791	0.0012498	0.023095	0.66912	-0.57965
QueryMZ	MetlinMass	Adducts	MID	Common_name	Annotation
NEG	716.292	5.95	0.0046911	0.069568	0.71976	-0.47442	0.18286	0.5251	0.83426	-0.26143	0.042918	0.15557	0.77466	-0.36836	0.002615	0.024161	0.43098	-1.2143	0.014838	0.080335	0.59879	-0.73988	0.015158	0.094059	0.51661	-0.95287	0.013559	0.089975	0.55635	-0.84593
QueryMZ	MetlinMass	Adducts	MID	Common_name	Annotation
NEG	527.315	5.06	0.0047082	0.069568	0.60644	-0.72157	0.0085591	0.12991	0.62792	-0.67135	0.00054989	0.0093497	0.48133	-1.0549	0.00011481	0.0022695	0.19702	-2.3436	0.00076088	0.011809	0.32488	-1.622	0.00072321	0.02139	0.31377	-1.6722	0.0036244	0.042493	0.40933	-1.2887
QueryMZ	MetlinMass	Adducts	MID	Common_name	Annotation
527.3147	528.345	M-H	88971	Ganoderic acid V	Endogenous;Food;Plant;TCM Ingredients
527.3147	528.272	M-H	89649	Physapubenolide	Endogenous;Food;TCM Ingredients
527.3147	528.345	M-H	90540	(22S)-Acetoxy-3alpha,15alpha-dihydroxylanosta-7,9(11),24-trien-26-oic acid	Endogenous;Food;Plant
527.3147	528.345	M-H	90635	(24E)-3alpha-Acetoxy-15alpha,22S-dihydroxylanosta-7,9(11),24-trien-26-oic acid	Endogenous;Food
527.3147	528.272	M-H	91030	Ganoderenic acid E	Endogenous;Food;TCM Ingredients
527.3147	528.272	M-H	91099	20-Hydroxy-3,7,11,15,23-pentaoxolanost-8-en-26-oic acid	Endogenous;Food;Plant;TCM Ingredients
527.3147	528.272	M-H	92422	Artenolide	Endogenous;Food;Plant
527.3147	528.345	M-H	88971	Ganoderic acid V	Endogenous;Food;Plant;TCM Ingredients
527.3147	528.345	M-H	90540	(22S)-Acetoxy-3alpha,15alpha-dihydroxylanosta-7,9(11),24-trien-26-oic acid	Endogenous;Food;Plant
527.3147	528.345	M-H	90635	(24E)-3alpha-Acetoxy-15alpha,22S-dihydroxylanosta-7,9(11),24-trien-26-oic acid	Endogenous;Food
527.3147	528.272	M-H	91030	Ganoderenic acid E	Endogenous;Food;TCM Ingredients
527.3147	528.272	M-H	91099	20-Hydroxy-3,7,11,15,23-pentaoxolanost-8-en-26-oic acid	Endogenous;Food;Plant;TCM Ingredients
527.3147	528.272	M-H	92422	Artenolide	Endogenous;Food;Plant
NEG	674.395	7.92	0.0047858	0.069568	1.7348	0.79475	0.60855	0.84926	0.95949	-0.059661	0.00026285	0.0055855	0.54599	-0.87304	0.29039	0.50168	0.82699	-0.27406	0.011716	0.07063	0.47671	-1.0688	0.60968	0.79911	0.86191	-0.2144	0.14247	0.36188	1.5146	0.59898
QueryMZ	MetlinMass	Adducts	MID	Common_name	Annotation
674.3953	675.411	M-H	78583	PS(14:1(9Z)/14:1(9Z))	Endogenous;Food
NEG	1164.66	5.96	0.0048693	0.070151	0.67856	-0.55945	0.052831	0.27647	0.78581	-0.34775	0.004652	0.036955	0.67914	-0.55822	0.010648	0.057103	0.37239	-1.4251	0.04498	0.15112	0.54879	-0.86567	0.026119	0.12354	0.47389	-1.0774	0.044472	0.17027	0.54832	-0.8669
QueryMZ	MetlinMass	Adducts	MID	Common_name	Annotation
NEG	898.557	8.25	0.0049663	0.070483	0.51574	-0.95527	0.016421	0.1801	0.64504	-0.63254	4.3657e-06	0.0015252	0.44546	-1.1666	0.0020378	0.019769	0.32943	-1.602	0.22819	0.44691	0.63874	-0.64671	0.052999	0.19293	0.51071	-0.96944	0.15912	0.38699	0.73952	-0.43534
QueryMZ	MetlinMass	Adducts	MID	Common_name	Annotation
NEG	786.516	8.37	0.0050705	0.071239	0.59364	-0.75234	0.061094	0.2959	0.70821	-0.49776	0.0034159	0.030403	0.49562	-1.0127	3.8413e-05	0.001223	0.3358	-1.5743	0.026129	0.11057	0.56565	-0.82201	0.02474	0.11948	0.47415	-1.0766	0.24622	0.50553	0.67753	-0.56164
QueryMZ	MetlinMass	Adducts	MID	Common_name	Annotation
786.5163	787.515	M-H	60518	PE(18:2(9Z,12Z)/22:6(4Z,7Z,10Z,13Z,16Z,19Z))	Endogenous;Food;Microbial Metabolites
786.5163	787.515	M-H	60549	PE(18:3(6Z,9Z,12Z)/22:5(4Z,7Z,10Z,13Z,16Z))	Endogenous;Food;Microbial Metabolites
786.5163	787.515	M-H	60550	PE(18:3(6Z,9Z,12Z)/22:5(7Z,10Z,13Z,16Z,19Z))	Endogenous;Food;Microbial Metabolites
786.5163	787.515	M-H	60581	PE(18:3(9Z,12Z,15Z)/22:5(4Z,7Z,10Z,13Z,16Z))	Endogenous;Food;Microbial Metabolites
786.5163	787.515	M-H	60582	PE(18:3(9Z,12Z,15Z)/22:5(7Z,10Z,13Z,16Z,19Z))	Endogenous;Food;Microbial Metabolites
786.5163	787.515	M-H	60613	PE(18:4(6Z,9Z,12Z,15Z)/22:4(7Z,10Z,13Z,16Z))	Endogenous;Food;Microbial Metabolites
786.5163	787.515	M-H	60731	PE(20:3(5Z,8Z,11Z)/20:5(5Z,8Z,11Z,14Z,17Z))	Endogenous;Food;Microbial Metabolites
786.5163	787.515	M-H	60764	PE(20:3(8Z,11Z,14Z)/20:5(5Z,8Z,11Z,14Z,17Z))	Endogenous;Food;Microbial Metabolites
786.5163	787.515	M-H	40439	PE(20:4(5Z,8Z,11Z,14Z)/20:4(5Z,8Z,11Z,14Z))[U]	Endogenous;Food;Microbial Metabolites
786.5163	787.515	M-H	60795	PE(20:4(5Z,8Z,11Z,14Z)/20:4(5Z,8Z,11Z,14Z))	Endogenous;Food;Microbial Metabolites
786.5163	787.515	M-H	60796	PE(20:4(5Z,8Z,11Z,14Z)/20:4(8Z,11Z,14Z,17Z))	Endogenous;Food;Microbial Metabolites
786.5163	787.515	M-H	60828	PE(20:4(8Z,11Z,14Z,17Z)/20:4(5Z,8Z,11Z,14Z))	Endogenous;Food;Microbial Metabolites
786.5163	787.515	M-H	60829	PE(20:4(8Z,11Z,14Z,17Z)/20:4(8Z,11Z,14Z,17Z))	Endogenous;Food;Microbial Metabolites
786.5163	787.515	M-H	60859	PE(20:5(5Z,8Z,11Z,14Z,17Z)/20:3(5Z,8Z,11Z))	Endogenous;Food;Microbial Metabolites
786.5163	787.515	M-H	60860	PE(20:5(5Z,8Z,11Z,14Z,17Z)/20:3(8Z,11Z,14Z))	Endogenous;Food;Microbial Metabolites
786.5163	787.515	M-H	60980	PE(22:4(7Z,10Z,13Z,16Z)/18:4(6Z,9Z,12Z,15Z))	Endogenous;Food;Microbial Metabolites
786.5163	787.515	M-H	61011	PE(22:5(4Z,7Z,10Z,13Z,16Z)/18:3(6Z,9Z,12Z))	Endogenous;Food;Microbial Metabolites
786.5163	787.515	M-H	61012	PE(22:5(4Z,7Z,10Z,13Z,16Z)/18:3(9Z,12Z,15Z))	Endogenous;Food;Microbial Metabolites
786.5163	787.515	M-H	61044	PE(22:5(7Z,10Z,13Z,16Z,19Z)/18:3(6Z,9Z,12Z))	Endogenous;Food;Microbial Metabolites
786.5163	787.515	M-H	61045	PE(22:5(7Z,10Z,13Z,16Z,19Z)/18:3(9Z,12Z,15Z))	Endogenous;Food;Microbial Metabolites
786.5163	787.515	M-H	61076	PE(22:6(4Z,7Z,10Z,13Z,16Z,19Z)/18:2(9Z,12Z))	Endogenous;Food;Microbial Metabolites
786.5163	787.536	M-H	40816	PS(18:0/18:2(9Z,12Z))	Endogenous;Food
786.5163	787.536	M-H	40798	PS(18:1(9Z)/18:1(9Z))[U]	Endogenous;Food;Microbial Metabolites
786.5163	787.536	M-H	40815	PS(18:1(9Z)/18:1(9Z))	Endogenous;Food;Microbial Metabolites
786.5163	787.536	M-H	78540	PS(18:2(9Z,12Z)/18:0)	Endogenous;Food
786.5163	787.536	M-H	77881	PS(16:1(9Z)/20:1(11Z))	Endogenous;Food
786.5163	787.536	M-H	77861	PS(16:0/20:2(11Z,14Z))	Endogenous;Food
786.5163	787.536	M-H	78199	PS(20:1(11Z)/16:1(9Z))	Endogenous;Food
786.5163	787.536	M-H	78228	PS(20:2(11Z,14Z)/16:0)	Endogenous;Food
786.5163	787.536	M-H	78422	PS(22:2(13Z,16Z)/14:0)	Endogenous;Food
786.5163	787.515	M-H	40439	PE(20:4(5Z,8Z,11Z,14Z)/20:4(5Z,8Z,11Z,14Z))[U]	Endogenous;Food;Microbial Metabolites
786.5163	787.536	M-H	40798	PS(18:1(9Z)/18:1(9Z))[U]	Endogenous;Food;Microbial Metabolites
NEG	593.253	3.16	0.0052204	0.072455	2.6019	1.3796	0.38111	0.72743	1.2667	0.34103	0.65519	0.82891	0.83627	-0.25796	0.0085817	0.048308	3.883	1.9572	0.43168	0.63597	1.4924	0.57761	0.02132	0.10917	3.0655	1.6161	0.0015764	0.02707	4.6432	2.2151
QueryMZ	MetlinMass	Adducts	MID	Common_name	Annotation
NEG	620.293	5.53	0.0052423	0.072455	1.5992	0.67733	0.11252	0.41033	1.3245	0.40548	0.0063897	0.043209	1.4235	0.50949	0.007156	0.044398	1.5921	0.6709	0.98708	0.99175	0.99555	-0.0064329	0.32537	0.57023	1.202	0.26542	0.48175	0.74235	1.1184	0.16141
QueryMZ	MetlinMass	Adducts	MID	Common_name	Annotation
NEG	526.311	5.06	0.0053268	0.073029	0.57145	-0.80731	0.095661	0.37526	0.69385	-0.52731	0.001889	0.023543	0.5035	-0.98994	0.00023278	0.0039506	0.20045	-2.3187	0.0016196	0.020395	0.35078	-1.5114	0.0030414	0.040081	0.2889	-1.7914	0.0041691	0.046451	0.39812	-1.3287
QueryMZ	MetlinMass	Adducts	MID	Common_name	Annotation
526.3113	527.301	M-H	62282	LysoPE(0:0/22:5(4Z,7Z,10Z,13Z,16Z))	Endogenous;Food
526.3113	527.301	M-H	62283	LysoPE(0:0/22:5(7Z,10Z,13Z,16Z,19Z))	Endogenous;Food
526.3113	527.301	M-H	62308	LysoPE(22:5(4Z,7Z,10Z,13Z,16Z)/0:0)	Endogenous;Food
526.3113	527.301	M-H	62309	LysoPE(22:5(7Z,10Z,13Z,16Z,19Z)/0:0)	Endogenous;Food
526.3113	527.361	M-H	86863	Daphniphylline	Endogenous;Food;Plant;TCM Ingredients
NEG	695.426	6.76	0.0057363	0.075764	0.55864	-0.84002	4.8643e-05	0.013782	0.3629	-1.4624	1.0275e-05	0.0021834	0.2741	-1.8672	5.7696e-06	0.00026509	0.029673	-5.0747	1.2184e-05	0.00064729	0.053117	-4.2347	2.7557e-05	0.0066924	0.081767	-3.6123	7.3405e-05	0.0035868	0.10826	-3.2075
QueryMZ	MetlinMass	Adducts	MID	Common_name	Annotation
695.4261	696.473	M-H	87403	1,2-Di-(9Z,12Z-octadecadienoyl)-sn-glycero-3-phosphate	Endogenous;Food
695.4261	696.408	M-H	90958	Momordicoside E	Endogenous;Food
695.4261	696.408	M-H	92882	Glucosyl passiflorate	Endogenous;Food;TCM Ingredients
695.4261	696.473	M-H	82052	PA(18:0/18:4(6Z,9Z,12Z,15Z))	Endogenous;Food
695.4261	696.473	M-H	81494	PA(18:1(9Z)/18:3(6Z,9Z,12Z))	Endogenous;Food
695.4261	696.473	M-H	82046	PA(18:1(9Z)/18:3(9Z,12Z,15Z))	Endogenous;Food
695.4261	696.473	M-H	81600	PA(18:4(6Z,9Z,12Z,15Z)/18:0)	Endogenous;Food
695.4261	696.473	M-H	82024	PA(20:4(5Z,8Z,11Z,14Z)/16:0)	Endogenous;Food
695.4261	696.473	M-H	81954	PA(22:4(7Z,10Z,13Z,16Z)/14:0)	Endogenous;Food
695.4261	696.473	M-H	81383	PA(16:1(9Z)/20:3(8Z,11Z,14Z))	Endogenous;Food
695.4261	696.473	M-H	81760	PA(20:3(8Z,11Z,14Z)/16:1(9Z))	Endogenous;Food
695.4261	696.473	M-H	87403	1,2-Di-(9Z,12Z-octadecadienoyl)-sn-glycero-3-phosphate	Endogenous;Food
695.4261	696.408	M-H	90958	Momordicoside E	Endogenous;Food
695.4261	696.408	M-H	92882	Glucosyl passiflorate	Endogenous;Food;TCM Ingredients
NEG	709.282	5.96	0.0058639	0.076682	0.76562	-0.3853	0.10153	0.38788	0.86569	-0.20807	0.0072546	0.04619	0.82247	-0.28196	0.0027359	0.024872	0.50875	-0.97498	0.0337	0.12833	0.66449	-0.58969	0.013322	0.090587	0.58768	-0.76691	0.012268	0.084092	0.61856	-0.69302
QueryMZ	MetlinMass	Adducts	MID	Common_name	Annotation
NEG	741.383	7.91	0.0062553	0.079402	1.6791	0.7477	0.90717	0.97639	1.0866	0.11983	0.0010534	0.015438	0.60411	-0.72712	0.28729	0.49685	0.83663	-0.25734	0.0084088	0.062277	0.49826	-1.005	0.39304	0.62857	0.76995	-0.37717	0.12192	0.32678	1.3849	0.46978
QueryMZ	MetlinMass	Adducts	MID	Common_name	Annotation
741.3828	742.365	M-H	86993	Hordatine B glucoside	Endogenous;Food;Plant
NEG	481.311	5.94	0.0062681	0.079402	1.5556	0.63744	0.28406	0.6457	0.87567	-0.19154	0.0028771	0.028941	0.70081	-0.51291	0.031816	0.12125	0.6467	-0.62883	0.0023037	0.026641	0.41573	-1.2663	0.16451	0.38844	0.73852	-0.43729	0.47641	0.73864	0.92279	-0.11592
QueryMZ	MetlinMass	Adducts	MID	Common_name	Annotation
481.3109	482.34	M-H	88194	Adlupone	Endogenous;Food
481.3109	482.34	M-H	88194	Adlupone	Endogenous;Food
NEG	525.27	3.17	0.0067081	0.082881	2.6231	1.3913	0.82375	0.94986	1.1614	0.21592	0.44268	0.68338	0.71947	-0.47498	0.00699	0.044028	5.1925	2.3764	0.19205	0.39934	1.9795	0.98515	0.01353	0.090836	4.4707	2.1605	0.00054016	0.014042	7.2171	2.8514
QueryMZ	MetlinMass	Adducts	MID	Common_name	Annotation
525.2697	526.257	M-H	88914	Ganosporeric acid A	Endogenous;Food
525.2697	526.257	M-H	92302	Withangulatin A	Endogenous;Food;Plant;TCM Ingredients
525.2697	526.257	M-H	92908	Absintholide	Endogenous;Food;Plant;TCM Ingredients
525.2697	526.257	M-H	92908	Absintholide	Endogenous;Food;Plant;TCM Ingredients
NEG	526.273	3.17	0.0070066	0.083702	2.7945	1.4826	0.88209	0.96808	1.1279	0.17367	0.64429	0.81922	0.77956	-0.35927	0.004521	0.034311	5.5728	2.4784	0.17909	0.38104	1.9942	0.99578	0.0082155	0.071992	4.9407	2.3047	0.00035253	0.011071	7.1486	2.8377
QueryMZ	MetlinMass	Adducts	MID	Common_name	Annotation
526.273	527.301	M-H	62282	LysoPE(0:0/22:5(4Z,7Z,10Z,13Z,16Z))	Endogenous;Food
526.273	527.301	M-H	62283	LysoPE(0:0/22:5(7Z,10Z,13Z,16Z,19Z))	Endogenous;Food
526.273	527.301	M-H	62308	LysoPE(22:5(4Z,7Z,10Z,13Z,16Z)/0:0)	Endogenous;Food
526.273	527.301	M-H	62309	LysoPE(22:5(7Z,10Z,13Z,16Z,19Z)/0:0)	Endogenous;Food
NEG	605.405	7.91	0.0076645	0.088637	1.7521	0.80908	0.47263	0.78639	0.91402	-0.1297	0.00089633	0.013574	0.53848	-0.89303	0.17037	0.3699	0.75281	-0.40964	0.0085282	0.062594	0.42966	-1.2187	0.54019	0.74119	0.82363	-0.27993	0.31006	0.57924	1.398	0.48339
QueryMZ	MetlinMass	Adducts	MID	Common_name	Annotation
605.405	606.426	M-H	81304	PA(15:0/14:0)	Endogenous;Food
NEG	594.481	7.59	0.0080819	0.09184	0.59778	-0.7423	1.5696e-05	0.0053365	4.2845	2.0991	0.30186	0.54963	3.0913	1.6282	0.012109	0.061633	2.0336	1.024	7.6325e-05	0.0023591	3.4018	1.7663	0.0085121	0.073455	0.47463	-1.0751	0.87552	0.95655	0.65784	-0.6042
QueryMZ	MetlinMass	Adducts	MID	Common_name	Annotation
NEG	1043.61	5.11	0.0081035	0.09184	1.8252	0.86802	0.050448	0.27312	0.71074	-0.4926	0.04207	0.15342	0.72354	-0.46686	4.206e-05	0.0012791	0.24474	-2.0307	1.4559e-05	0.00073031	0.13409	-2.8987	0.00057029	0.019786	0.34435	-1.5381	0.00013955	0.0060828	0.33826	-1.5638
QueryMZ	MetlinMass	Adducts	MID	Common_name	Annotation
NEG	549.299	5.94	0.0092299	0.099941	1.7125	0.77612	0.65997	0.86908	1.0926	0.1278	0.5823	0.78446	0.93342	-0.099401	0.31525	0.52646	0.85526	-0.22556	0.0052654	0.048913	0.49942	-1.0017	0.24087	0.48345	0.78276	-0.35336	0.788	0.90821	0.91627	-0.12616
QueryMZ	MetlinMass	Adducts	MID	Common_name	Annotation
549.2987	550.302	M-H	66900	Hordatine A	Endogenous;Food;Plant;TCM Ingredients
549.2987	550.302	M-H	66900	Hordatine A	Endogenous;Food;Plant;TCM Ingredients
NEG	453.281	5.32	0.0094127	0.10128	1.6561	0.72781	0.79708	0.94034	1.0275	0.039137	0.066885	0.20901	0.72815	-0.45769	0.15289	0.34425	0.71929	-0.47536	0.0038963	0.039427	0.43432	-1.2032	0.093589	0.28053	0.70004	-0.5145	0.78953	0.90935	0.98783	-0.017669
QueryMZ	MetlinMass	Adducts	MID	Common_name	Annotation
453.2811	454.329	M-H	57911	27-Norcholestanehexol	Endogenous;Food
453.2811	454.308	M-H	3909	Coenzyme Q4	Endogenous;Food;Microbial Metabolites
453.2811	454.241	M-H	86592	Methyl cellulose	Cosmetic;Endogenous;Food
453.2811	454.272	M-H	86668	Withanolide B	Endogenous;Food;Plant;TCM Ingredients
453.2811	454.272	M-H	86677	Euglobal IVa	Endogenous;Food;TCM Ingredients
453.2811	454.272	M-H	86679	Euglobal VII	Endogenous;Food;TCM Ingredients
453.2811	454.272	M-H	86680	Euglobal V	Endogenous;Food;TCM Ingredients
453.2811	454.272	M-H	86768	Euglobal III	Endogenous;Food;TCM Ingredients
453.2811	454.308	M-H	91859	Ceanothenic acid	Endogenous;Food
453.2811	454.272	M-H	93360	Macrocarpal C	Endogenous;Food;TCM Ingredients
453.2811	454.272	M-H	86668	Withanolide B	Endogenous;Food;Plant;TCM Ingredients
453.2811	454.272	M-H	86677	Euglobal IVa	Endogenous;Food;TCM Ingredients
453.2811	454.272	M-H	86679	Euglobal VII	Endogenous;Food;TCM Ingredients
453.2811	454.272	M-H	86768	Euglobal III	Endogenous;Food;TCM Ingredients
453.2811	454.308	M-H	91859	Ceanothenic acid	Endogenous;Food
NEG	738.507	8.58	0.0095914	0.10246	0.41375	-1.2732	0.14504	0.47508	0.64202	-0.63931	0.001578	0.020795	0.26444	-1.919	9.8976e-05	0.0020519	0.11948	-3.0652	0.0030224	0.033261	0.28876	-1.792	0.0069809	0.065206	0.18609	-2.4259	0.097047	0.28335	0.4518	-1.1462
QueryMZ	MetlinMass	Adducts	MID	Common_name	Annotation
738.5072	739.515	M-H	59393	PC(15:0/18:4(6Z,9Z,12Z,15Z))	Endogenous;Food;Microbial Metabolites
738.5072	739.552	M-H	59638	PC(18:3(6Z,9Z,12Z)/P-16:0)	Endogenous;Food;Microbial Metabolites
738.5072	739.552	M-H	59671	PC(18:3(9Z,12Z,15Z)/P-16:0)	Endogenous;Food;Microbial Metabolites
738.5072	739.515	M-H	59677	PC(18:4(6Z,9Z,12Z,15Z)/15:0)	Endogenous;Food;Microbial Metabolites
738.5072	739.515	M-H	60288	PE(14:0/22:4(7Z,10Z,13Z,16Z))	Endogenous;Food;Microbial Metabolites
738.5072	739.515	M-H	40495	PE(16:0/20:4(5Z,8Z,11Z,14Z))	Endogenous;Food;Microbial Metabolites
738.5072	739.515	M-H	60372	PE(16:0/20:4(8Z,11Z,14Z,17Z))	Endogenous;Food;Microbial Metabolites
738.5072	739.515	M-H	60397	PE(16:1(9Z)/20:3(5Z,8Z,11Z))	Endogenous;Food;Microbial Metabolites
738.5072	739.515	M-H	60423	PE(18:0/18:4(6Z,9Z,12Z,15Z))	Endogenous;Food;Microbial Metabolites
738.5072	739.515	M-H	60446	PE(18:1(11Z)/18:3(6Z,9Z,12Z))	Endogenous;Food;Microbial Metabolites
738.5072	739.515	M-H	60447	PE(18:1(11Z)/18:3(9Z,12Z,15Z))	Endogenous;Food;Microbial Metabolites
738.5072	739.515	M-H	60474	PE(18:1(9Z)/18:3(6Z,9Z,12Z))	Endogenous;Food;Microbial Metabolites
738.5072	739.515	M-H	60475	PE(18:1(9Z)/18:3(9Z,12Z,15Z))	Endogenous;Food;Microbial Metabolites
738.5072	739.515	M-H	40414	PE(18:2(9Z,12Z)/18:2(9Z,12Z))[U]	Endogenous;Food;Microbial Metabolites
738.5072	739.515	M-H	40509	PE(18:2(9Z,12Z)/18:2(9Z,12Z))	Endogenous;Food;Microbial Metabolites
738.5072	739.515	M-H	60531	PE(18:3(6Z,9Z,12Z)/18:1(11Z))	Endogenous;Food;Microbial Metabolites
738.5072	739.515	M-H	60532	PE(18:3(6Z,9Z,12Z)/18:1(9Z))	Endogenous;Food;Microbial Metabolites
738.5072	739.515	M-H	60563	PE(18:3(9Z,12Z,15Z)/18:1(11Z))	Endogenous;Food;Microbial Metabolites
738.5072	739.515	M-H	60564	PE(18:3(9Z,12Z,15Z)/18:1(9Z))	Endogenous;Food;Microbial Metabolites
738.5072	739.515	M-H	60595	PE(18:4(6Z,9Z,12Z,15Z)/18:0)	Endogenous;Food;Microbial Metabolites
738.5072	739.515	M-H	60716	PE(20:3(5Z,8Z,11Z)/16:1(9Z))	Endogenous;Food;Microbial Metabolites
738.5072	739.515	M-H	60749	PE(20:3(8Z,11Z,14Z)/16:1(9Z))	Endogenous;Food;Microbial Metabolites
738.5072	739.515	M-H	60781	PE(20:4(5Z,8Z,11Z,14Z)/16:0)	Endogenous;Food;Microbial Metabolites
738.5072	739.515	M-H	60814	PE(20:4(8Z,11Z,14Z,17Z)/16:0)	Endogenous;Food;Microbial Metabolites
738.5072	739.515	M-H	60969	PE(22:4(7Z,10Z,13Z,16Z)/14:0)	Endogenous;Food;Microbial Metabolites
738.5072	739.552	M-H	62042	PC(P-16:0/18:3(6Z,9Z,12Z))	Endogenous;Food;Microbial Metabolites
738.5072	739.552	M-H	62043	PC(P-16:0/18:3(9Z,12Z,15Z))	Endogenous;Food;Microbial Metabolites
738.5072	739.515	M-H	40414	PE(18:2(9Z,12Z)/18:2(9Z,12Z))[U]	Endogenous;Food;Microbial Metabolites
NEG	211.133	3.28	0.0096433	0.10246	0.38914	-1.3616	0.20788	0.55501	0.71614	-0.48168	0.43275	0.6737	0.83784	-0.25526	3.8847e-05	0.001223	0.14987	-2.7382	0.3335	0.54358	0.38512	-1.3766	0.0087486	0.074125	0.20927	-2.2566	0.00041605	0.011915	0.17887	-2.483
QueryMZ	MetlinMass	Adducts	MID	Common_name	Annotation
211.1329	212.116	M-H	62027	L-prolyl-L-proline	Endogenous;Food
211.1329	212.091	M-H	85754	Glycyl-Histidine	Endogenous
211.1329	212.091	M-H	85791	Histidinyl-Glycine	Endogenous
211.1329	212.141	M-H	86234	Cucurbic acid	Endogenous;Food;Plant;TCM Ingredients
211.1329	212.106	M-H	72974	MeIQ	Carcinogenic Potency;Endogenous;Food
211.1329	212.095	M-H	43924	Harmine	Drug;Endogenous;Food;Plant;TCM Ingredients
211.1329	212.178	M-H	87350	10-Undecenyl acetate	Cosmetic;Endogenous;Food
211.1329	212.178	M-H	87359	Methyl (E)-2-dodecenoate	Endogenous;Food
211.1329	212.178	M-H	87911	Coniferan	Endogenous;Food
211.1329	212.095	M-H	44541	DIPHENYLUREA	Agricultural Chemicals;Drug;Endogenous;Food;Plant
211.1329	212.178	M-H	88715	(&plusmn;)-(E)-3-Methyl-4-decen-1-yl acetate	Endogenous;Food
211.1329	212.141	M-H	44409	DIHYDROJASMONIC ACID	Endogenous;Food;Plant;TCM Ingredients
211.1329	212.178	M-H	89823	Ethyl 10-undecenoate	Cosmetic;Endogenous;Food;Microbial Metabolites
211.1329	212.141	M-H	90432	Vulgarole	Endogenous;Food;Plant;TCM Ingredients
211.1329	212.12	M-H	90991	11,12-Dihydrolactaroviolin	Endogenous;Food;Plant;TCM Ingredients
211.1329	212.12	M-H	91587	Pyrocurzerenone	Endogenous;Food;Plant;TCM Ingredients
211.1329	212.178	M-H	92154	Rhodinyl propionate	Cosmetic;Endogenous;Food
211.1329	212.178	M-H	92191	Citronellyl propionate	Cosmetic;Endogenous;Food;TCM Ingredients
211.1329	212.141	M-H	74731	Traumatin	Endogenous;Food
211.1329	212.178	M-H	92468	1-Ethylhexyl tiglate	Endogenous;Food
211.1329	212.178	M-H	94354	4-(3-Hydroxybutyl)-3,3,5-trimethylcyclohexanone	Endogenous;Food
211.1329	212.12	M-H	95852	Deterrol	Endogenous;Food
211.1329	212.178	M-H	88715	(&plusmn;)-(E)-3-Methyl-4-decen-1-yl acetate	Endogenous;Food
211.1329	212.141	M-H	44409	DIHYDROJASMONIC ACID	Endogenous;Food;Plant;TCM Ingredients
211.1329	212.141	M-H	90432	Vulgarole	Endogenous;Food;Plant;TCM Ingredients
211.1329	212.178	M-H	92468	1-Ethylhexyl tiglate	Endogenous;Food
211.1329	212.178	M-H	94354	4-(3-Hydroxybutyl)-3,3,5-trimethylcyclohexanone	Endogenous;Food
NEG	202.026	2.74	0.010097	0.10467	0.49498	-1.0146	0.13322	0.45115	0.68035	-0.55564	0.086308	0.25124	0.62327	-0.68208	8.5469e-08	1.2108e-05	0.027038	-5.2089	0.11147	0.28409	0.054624	-4.1943	0.01468	0.094059	0.039741	-4.6532	0.039506	0.15728	0.043381	-4.5268
QueryMZ	MetlinMass	Adducts	MID	Common_name	Annotation
202.0259	203.025	M-H	6438	Cystathionine ketimine	Endogenous;Food
202.0259	203.067	M-H	85733	Glutamyl-Glycine	Endogenous
202.0259	203.067	M-H	85753	Glycyl-Glutamate	Endogenous
202.0259	203.067	M-H	85733	Glutamyl-Glycine	Endogenous
202.0259	203.067	M-H	85753	Glycyl-Glutamate	Endogenous
NEG	257.175	4.15	0.010886	0.1095	0.47567	-1.072	0.0075403	0.12397	0.51781	-0.94951	0.063912	0.20309	0.62484	-0.67844	3.0082e-05	0.0010654	0.22142	-2.1752	0.12862	0.30839	0.46548	-1.1032	0.0025328	0.036934	0.42761	-1.2256	0.019936	0.1132	0.35436	-1.4967
QueryMZ	MetlinMass	Adducts	MID	Common_name	Annotation
257.1746	258.183	M-H	5833	Tetradecanedioic acid	Endogenous;Food;TCM Ingredients
257.1746	258.162	M-H	86972	Linalyl benzoate	Cosmetic;Endogenous;Food;TCM Ingredients
257.1746	258.219	M-H	87381	10-Hydroxymyristic acid methyl ester	Endogenous;Food
257.1746	258.162	M-H	89301	Geranyl benzoate	Cosmetic;Endogenous;Food
257.1746	258.162	M-H	92486	Falcarinolone	Endogenous;Food;TCM Ingredients
257.1746	258.162	M-H	93708	Ginsenoyne A	Endogenous;Food;TCM Ingredients
257.1746	258.162	M-H	93749	Flavidulol A	Endogenous;Food;Plant;TCM Ingredients
257.1746	258.162	M-H	94289	(all-E)-1,8,10-Heptadecatriene-4,6-diyne-3,12-diol	Endogenous;Food;TCM Ingredients
257.1746	258.183	M-H	94936	Diethyl decanedioate	Cosmetic;Endogenous;Food
257.1746	258.183	M-H	69920	Diisobutyl adipate	Cosmetic;Endogenous;Food;TCM Ingredients
257.1746	258.219	M-H	74561	3-hydroxy-pentadecanoic acid	Endogenous;Food
257.1746	258.219	M-H	87381	10-Hydroxymyristic acid methyl ester	Endogenous;Food
257.1746	258.162	M-H	94289	(all-E)-1,8,10-Heptadecatriene-4,6-diyne-3,12-diol	Endogenous;Food;TCM Ingredients
NEG	201.022	2.74	0.011015	0.1095	0.50412	-0.98817	0.15	0.48012	0.66759	-0.58296	0.10076	0.27761	0.6436	-0.63577	3.2853e-06	0.00018016	0.019092	-5.7109	0.087414	0.24522	0.037872	-4.7227	0.02703	0.12453	0.028598	-5.1279	0.059002	0.20049	0.029665	-5.0751
QueryMZ	MetlinMass	Adducts	MID	Common_name	Annotation
201.0224	202.027	M-H	65528	Bergaptol	Endogenous;Food;Plant;TCM Ingredients
201.0224	202.059	M-H	86267	Penmacric acid	Endogenous;Food;TCM Ingredients
201.0224	202.027	M-H	1201	Demethylmethoxsalen	Endogenous;Food;Plant;TCM Ingredients
201.0224	202.063	M-H	72523	2-Napthyloxyacetic acid	Agricultural Chemicals;Endogenous;Food
NEG	226.018	2.8	0.012376	0.12161	0.35857	-1.4797	0.021043	0.20372	0.36705	-1.4459	0.55884	0.76864	0.89578	-0.15878	6.9878e-05	0.0016273	0.066002	-3.9213	0.016203	0.084494	0.18407	-2.4417	0.37683	0.61257	0.17982	-2.4754	0.0021164	0.032234	0.073681	-3.7626
QueryMZ	MetlinMass	Adducts	MID	Common_name	Annotation
226.0177	227.043	M-H	58545	5-(2'-Carboxyethyl)-4,6-Dihydroxypicolinate	Endogenous;Food
226.0177	227.058	M-H	86807	Lansine	Endogenous;Food;Plant;TCM Ingredients
226.0177	227.058	M-H	86887	Mukeic acid	Endogenous;Food;TCM Ingredients
226.0177	227.043	M-H	58545	5-(2'-Carboxyethyl)-4,6-Dihydroxypicolinate	Endogenous;Food
NEG	947.61	5.33	0.013796	0.13226	1.6575	0.72901	0.67422	0.87562	0.93628	-0.094984	0.002725	0.028485	0.53649	-0.89837	0.017126	0.078056	0.42395	-1.238	0.0028909	0.032121	0.25578	-1.967	0.023049	0.11424	0.45281	-1.143	0.21554	0.46678	0.79023	-0.33965
QueryMZ	MetlinMass	Adducts	MID	Common_name	Annotation
NEG	705.338	5.96	0.013886	0.13226	0.84003	-0.25149	0.024145	0.21278	0.80782	-0.3079	0.0065079	0.04339	0.77455	-0.36857	0.0025281	0.023485	0.48661	-1.0391	0.011245	0.068767	0.57928	-0.78766	0.023256	0.11493	0.60238	-0.73125	0.028494	0.13163	0.62826	-0.67058
QueryMZ	MetlinMass	Adducts	MID	Common_name	Annotation
705.3381	706.32	M-H	94248	Physagulin E	Endogenous;Food;TCM Ingredients
705.3381	706.393	M-H	95463	Hovenidulcioside A2	Endogenous;Food
705.3381	706.32	M-H	94248	Physagulin E	Endogenous;Food;TCM Ingredients
705.3381	706.393	M-H	95463	Hovenidulcioside A2	Endogenous;Food
NEG	524.334	5.51	0.013926	0.13226	0.75037	-0.41433	0.061453	0.29595	0.70409	-0.50616	0.0021689	0.025334	0.65367	-0.61336	0.018212	0.081353	0.42729	-1.2267	0.042331	0.14567	0.56944	-0.81238	0.088191	0.26923	0.60687	-0.72055	0.069061	0.22534	0.65368	-0.61335
QueryMZ	MetlinMass	Adducts	MID	Common_name	Annotation
NEG	482.31	5.94	0.014548	0.13589	1.4803	0.56591	0.26141	0.61939	0.85491	-0.22616	0.0049645	0.038189	0.72254	-0.46884	0.068694	0.20966	0.69261	-0.5299	0.0063827	0.0547	0.46787	-1.0958	0.39954	0.63419	0.81015	-0.30373	0.59912	0.82041	0.95856	-0.061052
QueryMZ	MetlinMass	Adducts	MID	Common_name	Annotation
482.31	483.302	M-H	5690	Lithocholic acid taurine conjugate	Endogenous;Food
482.31	483.302	M-H	5690	Lithocholic acid taurine conjugate	Endogenous;Food
NEG	662.364	6.09	0.016461	0.15045	0.64306	-0.63697	0.16763	0.50349	0.77692	-0.36416	0.035312	0.13674	0.7109	-0.49228	0.00080699	0.0097992	0.30456	-1.7152	0.019734	0.092616	0.47361	-1.0782	0.021191	0.10917	0.39201	-1.3511	0.0089227	0.074073	0.42841	-1.2229
QueryMZ	MetlinMass	Adducts	MID	Common_name	Annotation
NEG	688.261	5.32	0.016582	0.15074	0.84776	-0.23828	0.44915	0.77049	0.94629	-0.079642	0.01228	0.069124	0.80641	-0.31041	0.0080027	0.046279	0.54396	-0.87844	0.024851	0.10833	0.64164	-0.64016	0.013276	0.090587	0.57483	-0.7988	0.045055	0.17059	0.67454	-0.56803
QueryMZ	MetlinMass	Adducts	MID	Common_name	Annotation
NEG	594.377	6.09	0.017151	0.15426	0.61775	-0.69491	0.071442	0.32215	0.63273	-0.66033	0.001975	0.023982	0.52257	-0.93629	0.0012581	0.013799	0.19392	-2.3665	0.0067317	0.056374	0.31392	-1.6716	0.020722	0.10806	0.30648	-1.7061	0.010288	0.079322	0.37109	-1.4302
QueryMZ	MetlinMass	Adducts	MID	Common_name	Annotation
NEG	1004.68	5.95	0.017661	0.15709	1.3806	0.46531	0.063871	0.29995	0.77883	-0.36062	0.001925	0.023543	0.67128	-0.57502	0.0078963	0.046174	0.36632	-1.4488	0.0025738	0.029366	0.26533	-1.9141	0.024884	0.11984	0.47035	-1.0882	0.036698	0.15179	0.54571	-0.87379
QueryMZ	MetlinMass	Adducts	MID	Common_name	Annotation
NEG	481.312	5.34	0.017741	0.15709	0.86107	-0.2158	0.022168	0.20936	0.83162	-0.266	3.0283e-05	0.0022015	0.70158	-0.51133	0.0051331	0.036208	0.40639	-1.2991	0.010557	0.067215	0.47196	-1.0833	0.014249	0.093525	0.48867	-1.0331	0.030882	0.13531	0.57926	-0.78772
QueryMZ	MetlinMass	Adducts	MID	Common_name	Annotation
481.3121	482.34	M-H	88194	Adlupone	Endogenous;Food
481.3121	482.34	M-H	88194	Adlupone	Endogenous;Food
NEG	538.314	4.97	0.018085	0.15929	0.61689	-0.69692	0.21099	0.55696	0.75539	-0.4047	0.00071431	0.011349	0.43643	-1.1962	4.3377e-05	0.0012937	0.10766	-3.2154	7.928e-05	0.0023995	0.17453	-2.5185	0.00022039	0.012489	0.14253	-2.8107	0.00038838	0.01179	0.24669	-2.0192
QueryMZ	MetlinMass	Adducts	MID	Common_name	Annotation
NEG	919.551	8.63	0.018629	0.16325	1.1598	0.21384	0.60897	0.84926	1.0538	0.07554	0.0029975	0.029247	1.2837	0.3603	0.012154	0.061677	1.218	0.28451	0.24911	0.47106	1.0502	0.070673	0.12591	0.33237	1.1559	0.20897	0.43147	0.69878	0.94882	-0.075795
QueryMZ	MetlinMass	Adducts	MID	Common_name	Annotation
919.5513	920.513	M-H	90066	Hebevinoside XIII	Endogenous;Food;Plant
919.5513	920.513	M-H	90066	Hebevinoside XIII	Endogenous;Food;Plant
NEG	152.886	0.32	0.018797	0.16351	1.3415	0.42386	0.00015237	0.028781	1.7107	0.77462	0.00023319	0.0055596	1.6868	0.75431	0.33455	0.54425	0.8535	-0.22853	0.017608	0.088038	0.63622	-0.65239	0.001176	0.027284	0.49891	-1.0032	0.0014724	0.026348	0.50598	-0.98284
QueryMZ	MetlinMass	Adducts	MID	Common_name	Annotation
NEG	502.289	4.84	0.018982	0.16361	0.59659	-0.74519	0.058343	0.28904	0.60459	-0.72597	5.3398e-05	0.0026949	0.30866	-1.6959	2.9109e-07	2.4746e-05	0.12509	-2.999	0.00020867	0.0045479	0.20967	-2.2538	0.0030908	0.040419	0.2069	-2.273	0.0024629	0.033229	0.40527	-1.3031
QueryMZ	MetlinMass	Adducts	MID	Common_name	Annotation
502.289	503.301	M-H	62272	LysoPE(0:0/20:3(11Z,14Z,17Z))	Endogenous;Food
502.289	503.301	M-H	62273	LysoPE(0:0/20:3(5Z,8Z,11Z))	Endogenous;Food
502.289	503.301	M-H	62274	LysoPE(0:0/20:3(8Z,11Z,14Z))	Endogenous;Food
502.289	503.301	M-H	62299	LysoPE(20:3(11Z,14Z,17Z)/0:0)	Endogenous;Food
502.289	503.301	M-H	62300	LysoPE(20:3(5Z,8Z,11Z)/0:0)	Endogenous;Food
502.289	503.301	M-H	62301	LysoPE(20:3(8Z,11Z,14Z)/0:0)	Endogenous;Food
502.289	503.301	M-H	77688	PE(20:3(8Z,11Z,14Z)/0:0)	Endogenous;Food
502.289	503.301	M-H	62301	LysoPE(20:3(8Z,11Z,14Z)/0:0)	Endogenous;Food
NEG	1081.7	5.96	0.019055	0.16361	0.70079	-0.51294	0.052789	0.27647	0.71685	-0.48026	0.00096413	0.014252	0.58689	-0.76883	0.0036261	0.030517	0.25008	-1.9995	0.012361	0.072965	0.35685	-1.4866	0.015029	0.094059	0.34886	-1.5193	0.02127	0.1144	0.42611	-1.2307
QueryMZ	MetlinMass	Adducts	MID	Common_name	Annotation
NEG	789.585	9.11	0.01929	0.16479	0.65145	-0.61827	0.030388	0.23446	0.59612	-0.74633	0.29853	0.54727	0.82722	-0.27366	0.00047278	0.0066424	0.33274	-1.5875	0.0032404	0.034429	0.51077	-0.96925	0.073809	0.23764	0.55818	-0.84119	0.0043496	0.047705	0.40224	-1.3139
QueryMZ	MetlinMass	Adducts	MID	Common_name	Annotation
NEG	1082.7	5.96	0.019561	0.16605	0.67841	-0.55977	0.092787	0.36975	0.75158	-0.41201	0.0028771	0.028941	0.59383	-0.75187	0.0081168	0.046304	0.33379	-1.583	0.028666	0.11714	0.49202	-1.0232	0.022406	0.11203	0.44413	-1.171	0.046497	0.17473	0.5621	-0.8311
QueryMZ	MetlinMass	Adducts	MID	Common_name	Annotation
NEG	559.336	5.96	0.020607	0.17149	0.8118	-0.3008	0.011645	0.15199	0.78005	-0.35836	0.0071635	0.045782	0.74293	-0.42871	0.0047121	0.034981	0.40541	-1.3026	0.012847	0.074285	0.49939	-1.0017	0.017059	0.096992	0.51972	-0.9442	0.02457	0.12505	0.54569	-0.87384
QueryMZ	MetlinMass	Adducts	MID	Common_name	Annotation
NEG	581.242	4.14	0.020714	0.17149	1.5941	0.67275	0.028014	0.22464	1.833	0.8742	0.023828	0.10604	1.7775	0.82988	0.0015125	0.015872	2.8383	1.505	0.0046118	0.044294	1.7805	0.83228	0.07312	0.23632	1.5485	0.63083	0.045037	0.17059	1.5968	0.67515
QueryMZ	MetlinMass	Adducts	MID	Common_name	Annotation
NEG	1161.72	5.96	0.02078	0.17149	0.76661	-0.38344	0.17182	0.508	0.83336	-0.263	0.03471	0.13472	0.70408	-0.50618	0.005463	0.037599	0.30979	-1.6907	0.013779	0.077051	0.4041	-1.3072	0.013699	0.091322	0.37173	-1.4277	0.029441	0.13258	0.43998	-1.1845
QueryMZ	MetlinMass	Adducts	MID	Common_name	Annotation
NEG	984.518	8.24	0.022672	0.18362	0.67114	-0.57532	0.052667	0.27647	0.75648	-0.40262	0.0022331	0.025334	0.65261	-0.6157	0.0031028	0.027189	0.49102	-1.0261	0.22029	0.43647	0.73163	-0.45082	0.057583	0.20594	0.64909	-0.62351	0.10502	0.30023	0.75239	-0.41044
QueryMZ	MetlinMass	Adducts	MID	Common_name	Annotation
NEG	321.043	2.79	0.022683	0.18362	0.34065	-1.5536	0.17755	0.5155	0.54394	-0.87847	0.48757	0.72105	0.80189	-0.31852	4.6996e-05	0.0013097	0.039696	-4.6549	0.090442	0.25246	0.11653	-3.1012	0.0086244	0.073675	0.072978	-3.7764	0.0067053	0.061541	0.049503	-4.3363
QueryMZ	MetlinMass	Adducts	MID	Common_name	Annotation
321.0428	322.057	M-H	3451	dTMP	Drug;Endogenous;Food;Microbial Metabolites;Plant;TCM Ingredients
321.0428	322.057	M-H	3451	dTMP	Drug;Endogenous;Food;Microbial Metabolites;Plant;TCM Ingredients
NEG	798.528	8.32	0.023174	0.18607	0.71821	-0.47753	0.6089	0.84926	0.94372	-0.083564	0.25734	0.50183	0.82818	-0.27198	0.0066152	0.042437	0.5345	-0.90375	0.1028	0.27136	0.74421	-0.42622	0.047846	0.18014	0.56637	-0.82019	0.26743	0.5336	0.64538	-0.63177
QueryMZ	MetlinMass	Adducts	MID	Common_name	Annotation
798.528	799.515	M-H	59694	PC(18:4(6Z,9Z,12Z,15Z)/20:5(5Z,8Z,11Z,14Z,17Z))	Endogenous;Food;Microbial Metabolites
798.528	799.515	M-H	59949	PC(20:5(5Z,8Z,11Z,14Z,17Z)/18:4(6Z,9Z,12Z,15Z))	Endogenous;Food;Microbial Metabolites
NEG	266.886	3.62	0.023814	0.18917	0.71086	-0.49235	0.78277	0.93322	1.0149	0.021357	0.28005	0.52898	0.84727	-0.23911	0.050752	0.16917	0.73924	-0.43588	0.65154	0.79685	1.0399	0.056473	0.0022113	0.035994	0.72838	-0.45724	0.60697	0.82326	0.8725	-0.19677
QueryMZ	MetlinMass	Adducts	MID	Common_name	Annotation
NEG	642.295	5.96	0.024271	0.19014	0.82833	-0.27171	0.16835	0.50387	0.88418	-0.1776	0.027761	0.11624	0.8378	-0.25532	0.0061975	0.041155	0.50516	-0.98519	0.023318	0.10404	0.60985	-0.71347	0.018135	0.098975	0.57133	-0.80759	0.020691	0.11433	0.60296	-0.72987
QueryMZ	MetlinMass	Adducts	MID	Common_name	Annotation
NEG	708.278	5.95	0.025572	0.19942	0.78159	-0.35552	0.75891	0.9255	0.96553	-0.050614	0.088574	0.25651	0.82696	-0.27411	0.0060663	0.040442	0.48155	-1.0542	0.023012	0.10322	0.61612	-0.69873	0.0076731	0.069755	0.49874	-1.0036	0.017297	0.10539	0.58231	-0.78013
QueryMZ	MetlinMass	Adducts	MID	Common_name	Annotation
NEG	322.045	2.79	0.02588	0.20057	0.35039	-1.513	0.20515	0.55377	0.55993	-0.83669	0.51149	0.73316	0.74036	-0.43371	0.00025793	0.004176	0.080345	-3.6377	0.18657	0.39156	0.2293	-2.1247	0.018907	0.10172	0.14349	-2.801	0.0036976	0.043054	0.10852	-3.2039
QueryMZ	MetlinMass	Adducts	MID	Common_name	Annotation
322.0447	323.052	M-H	3452	5'-CMP	Endogenous;Food;Microbial Metabolites;Plant;TCM Ingredients
322.0447	323.052	M-H	62430	Cytidine 2'-phosphate	Endogenous;Food;TCM Ingredients
322.0447	323.052	M-H	62430	Cytidine 2'-phosphate	Endogenous;Food;TCM Ingredients
NEG	771.573	9.37	0.026412	0.20225	0.79863	-0.32441	0.60426	0.84926	0.95388	-0.068121	0.0073735	0.046425	0.79109	-0.33809	0.10204	0.26917	0.72899	-0.45604	0.43869	0.64125	0.9128	-0.13163	0.23106	0.47212	0.76423	-0.38791	0.42224	0.69271	0.9215	-0.11795
QueryMZ	MetlinMass	Adducts	MID	Common_name	Annotation
NEG	125.094	2.75	0.026652	0.20318	0.83518	-0.25984	0.47504	0.78749	1.0771	0.1072	0.00049928	0.0089344	0.75987	-0.39617	0.34073	0.5491	0.89289	-0.16344	0.94225	0.96679	1.0691	0.096399	0.2353	0.47839	0.82895	-0.27064	0.54134	0.77466	1.1751	0.23273
QueryMZ	MetlinMass	Adducts	MID	Common_name	Annotation
125.0941	126.054	M-H	629	5-Aminoimidazole-4-carboxamide	Endogenous;Food;Microbial Metabolites;TCM Ingredients
125.0941	126.104	M-H	75309	(E)-2-Octenal	Cosmetic;Endogenous;Food;TCM Ingredients
125.0941	126.068	M-H	86362	Methyl sorbate	Endogenous;Food
125.0941	126.104	M-H	87318	(Z)-2-Octenal	Endogenous;Food;TCM Ingredients;Toxins/Pollutant
125.0941	126.104	M-H	87319	(3xi,5Z)-1,5-Octadien-3-ol	Endogenous;Food;Plant;TCM Ingredients
125.0941	126.104	M-H	87486	2,4,4-Trimethylcyclopentanone	Endogenous;Food;Plant;TCM Ingredients
125.0941	126.068	M-H	87504	Enol-3-Ethyl-1,2-cyclopentanedione	Endogenous;Food
125.0941	126.141	M-H	97731	1-Nonene	Endogenous;Food;TCM Ingredients
125.0941	126.104	M-H	87568	2-Octen-4-one	Endogenous;Food;Plant
125.0941	126.104	M-H	87574	1-Octen-3-one	Endogenous;Food;Microbial Metabolites;Plant;TCM Ingredients
125.0941	126.104	M-H	87790	3-Methyl-3-hepten-2-one	Endogenous;Food;Plant;TCM Ingredients
125.0941	126.104	M-H	87791	5-Methyl-5-hepten-2-one	Endogenous;Food;Plant
125.0941	126.068	M-H	88156	Allyl crotonate	Endogenous;Food
125.0941	126.068	M-H	88370	4-Hydroxy-4-methyl-5-hexenoic acid gamma lactone	Endogenous;Food
125.0941	126.104	M-H	88427	6-Methyl-3-hepten-2-one, trans-	Endogenous;Food
125.0941	126.104	M-H	88472	4-Octen-3-one	Endogenous;Food
125.0941	126.104	M-H	44779	methylheptenone	Cosmetic;Endogenous;Food;Microbial Metabolites;Plant;TCM Ingredients
125.0941	126.068	M-H	92008	3,4-Dimethyl-1,2-cyclopentanedione	Cosmetic;Endogenous;Food;Plant
125.0941	126.104	M-H	94686	2,5-Octadien-1-ol	Endogenous;Food;TCM Ingredients
125.0941	126.104	M-H	94689	(3E,5Z)-3,5-Octadien-1-ol	Endogenous;Food
125.0941	126.104	M-H	94691	(2E,4E)-2,4-Octadien-1-ol	Endogenous;Food;TCM Ingredients
125.0941	126.104	M-H	75309	(E)-2-Octenal	Cosmetic;Endogenous;Food;TCM Ingredients
NEG	542.336	5.34	0.027126	0.20586	0.86543	-0.2085	0.036989	0.25436	0.83852	-0.25408	6.4357e-05	0.0026949	0.68718	-0.54123	0.0049188	0.035583	0.38729	-1.3685	0.009371	0.06487	0.44751	-1.16	0.012527	0.088365	0.46187	-1.1144	0.030274	0.13335	0.56359	-0.82728
QueryMZ	MetlinMass	Adducts	MID	Common_name	Annotation
542.3355	543.332	M-H	40314	PC(20:4(5Z,8Z,11Z,14Z)/0:0)	Endogenous;Food;Microbial Metabolites
542.3355	543.332	M-H	40315	PC(20:4(5Z,8Z,11Z,14Z)/0:0)[U]	Endogenous;Food;Microbial Metabolites
542.3355	543.332	M-H	61705	LysoPC(20:4(5Z,8Z,11Z,14Z))	Endogenous;Food;Microbial Metabolites
542.3355	543.332	M-H	61706	LysoPC(20:4(8Z,11Z,14Z,17Z))	Endogenous;Food;Microbial Metabolites
542.3355	543.332	M-H	40314	PC(20:4(5Z,8Z,11Z,14Z)/0:0)	Endogenous;Food;Microbial Metabolites
542.3355	543.332	M-H	40315	PC(20:4(5Z,8Z,11Z,14Z)/0:0)[U]	Endogenous;Food;Microbial Metabolites
NEG	948.612	5.33	0.028462	0.21046	1.5028	0.58768	0.38528	0.72743	0.86987	-0.20113	0.0058032	0.041452	0.58494	-0.77363	0.0074378	0.045057	0.39255	-1.349	0.0014057	0.018817	0.26121	-1.9367	0.016291	0.094945	0.45128	-1.1479	0.10513	0.30023	0.6711	-0.5754
QueryMZ	MetlinMass	Adducts	MID	Common_name	Annotation
NEG	510.268	3.9	0.028473	0.21046	2.5364	1.3428	0.082434	0.34774	1.6726	0.74213	0.14755	0.3628	1.3417	0.4241	0.0037191	0.030822	5.6446	2.4969	0.10668	0.27815	2.2254	1.1541	0.015267	0.094059	3.3746	1.7547	0.0036215	0.042493	4.2069	2.0728
QueryMZ	MetlinMass	Adducts	MID	Common_name	Annotation
510.2679	511.27	M-H	85287	AFN911	Drug Metabolite;Endogenous
NEG	673.393	7.91	0.029417	0.21418	1.8719	0.90452	0.36306	0.71589	0.88441	-0.17721	0.00030596	0.0061203	0.56391	-0.82646	0.22914	0.43936	0.80441	-0.31399	0.026468	0.1111	0.42973	-1.2185	0.78138	0.90302	0.90955	-0.13678	0.13084	0.34432	1.4265	0.51247
QueryMZ	MetlinMass	Adducts	MID	Common_name	Annotation
NEG	693.411	6.78	0.029482	0.21418	0.64406	-0.63472	0.00028088	0.036731	0.39958	-1.3234	0.00030961	0.0061203	0.39803	-1.3291	1.7528e-06	0.00010275	0.073995	-3.7564	8.5913e-07	0.00012475	0.11489	-3.1217	6.8953e-06	0.0039073	0.18518	-2.433	8.6121e-06	0.00069717	0.1859	-2.4274
QueryMZ	MetlinMass	Adducts	MID	Common_name	Annotation
693.4107	694.378	M-H	92456	Capsoside A	Endogenous;Food
693.4107	694.457	M-H	81301	PA(14:1(9Z)/22:4(7Z,10Z,13Z,16Z))	Endogenous;Food
693.4107	694.457	M-H	81495	PA(18:1(9Z)/18:4(6Z,9Z,12Z,15Z))	Endogenous;Food
693.4107	694.457	M-H	81515	PA(18:2(9Z,12Z)/18:3(6Z,9Z,12Z))	Endogenous;Food
693.4107	694.457	M-H	81516	PA(18:2(9Z,12Z)/18:3(9Z,12Z,15Z))	Endogenous;Food
693.4107	694.457	M-H	81543	PA(18:3(6Z,9Z,12Z)/18:2(9Z,12Z))	Endogenous;Food
693.4107	694.457	M-H	81572	PA(18:3(9Z,12Z,15Z)/18:2(9Z,12Z))	Endogenous;Food
693.4107	694.457	M-H	81601	PA(18:4(6Z,9Z,12Z,15Z)/18:1(9Z))	Endogenous;Food
693.4107	694.457	M-H	81790	PA(20:4(5Z,8Z,11Z,14Z)/16:1(9Z))	Endogenous;Food
693.4107	694.457	M-H	81819	PA(20:5(5Z,8Z,11Z,14Z,17Z)/16:0)	Endogenous;Food
693.4107	694.457	M-H	81955	PA(22:4(7Z,10Z,13Z,16Z)/14:1(9Z))	Endogenous;Food
693.4107	694.378	M-H	92456	Capsoside A	Endogenous;Food
NEG	949.615	5.33	0.030614	0.21841	1.441	0.52706	0.87555	0.96746	1.0466	0.065661	0.0089709	0.054661	0.62617	-0.67537	0.0079039	0.046174	0.44848	-1.1569	0.0012383	0.017398	0.31123	-1.6839	0.01018	0.080768	0.42853	-1.2225	0.13867	0.35556	0.71623	-0.48151
QueryMZ	MetlinMass	Adducts	MID	Common_name	Annotation
NEG	563.318	4.86	0.031012	0.21967	0.59764	-0.74265	0.0376	0.25555	0.56291	-0.82902	2.4703e-05	0.0022015	0.28596	-1.8061	1.2806e-06	7.7752e-05	0.10589	-3.2394	0.00032388	0.0061866	0.17717	-2.4968	0.0014278	0.029259	0.1881	-2.4104	0.00087465	0.018762	0.37028	-1.4333
QueryMZ	MetlinMass	Adducts	MID	Common_name	Annotation
NEG	157.077	0.39	0.033338	0.23419	0.8093	-0.30525	0.00021128	0.035917	0.62728	-0.67282	0.00057836	0.0097348	0.66709	-0.58405	0.39006	0.59205	0.88932	-0.16922	0.77173	0.86749	1.0989	0.13603	0.095677	0.28287	1.4177	0.5036	0.16968	0.40304	1.3331	0.41483
QueryMZ	MetlinMass	Adducts	MID	Common_name	Annotation
157.0768	158.094	M-H	5440	4-Hydroxycyclohexylacetic acid	Endogenous;Food;Microbial Metabolites
157.0768	158.044	M-H	89	Allantoin	Carcinogenic Potency;Cosmetic,;Drug;Endogenous;Food;Microbial Metabolites;Plant;TCM Ingredients;Toxins/Pollutant
157.0768	158.058	M-H	4154	Succinylacetone	Endogenous;Food;Toxins/Pollutant
157.0768	158.131	M-H	5763	Ethyl heptanoate	Cosmetic;Endogenous;Food;Microbial Metabolites;TCM Ingredients
157.0768	158.131	M-H	5810	Nonanoic acid	Cosmetic;Endogenous;Food;Microbial Metabolites;Plant;TCM Ingredients
157.0768	158.094	M-H	5865	trans-4-Hydroxycyclohexylacetic acid	Endogenous;Food
157.0768	158.094	M-H	35712	3-keto-n-caprylic acid	Endogenous;Food
157.0768	158.094	M-H	35711	2-keto-n-caprylic acid	Endogenous;Food
157.0768	158.094	M-H	86875	6-Ethyl-1-methyl-2,7,8-trioxabicyclo[3.2.1]octane	Endogenous;Food;Plant
157.0768	158.131	M-H	86894	xi-2-Ethylheptanoic acid	Endogenous;Food
157.0768	158.094	M-H	87470	Tetrahydrofurfuryl propionate	Endogenous;Food
157.0768	158.131	M-H	87561	Methyl caprylate	Cosmetic;Endogenous;Food;Microbial Metabolites;TCM Ingredients
157.0768	158.094	M-H	44755	Ethyl butyrylacetate	Endogenous;Food
157.0768	158.131	M-H	46185	Heptyl acetate	Cosmetic;Endogenous;Food;Microbial Metabolites;Plant;TCM Ingredients
157.0768	158.131	M-H	34664	4-methyl-octanoic acid	Endogenous;Food
157.0768	158.069	M-H	87848	1-(Hydroxymethyl)-5,5-dimethyl-2,4-imidazolidinedione	Agricultural Chemicals;Cosmetic;Endogenous;Food
157.0768	158.131	M-H	88140	Butyl 3-methylbutanoate	Cosmetic;Endogenous;Food;TCM Ingredients
157.0768	158.131	M-H	88351	3-Heptyl acetate	Endogenous;Food
157.0768	158.077	M-H	88389	S-Isopropyl 3-methylbut-2-enethioate	Cosmetic;Endogenous;Food
157.0768	158.131	M-H	88430	5-Methylhexyl acetate	Endogenous;Food
157.0768	158.131	M-H	88475	3-Octyl formate	Endogenous;Food
157.0768	158.131	M-H	89748	Pentyl butanoate	Cosmetic;Endogenous;Food
157.0768	158.131	M-H	89750	Propyl hexanoate	Endogenous;Food;Microbial Metabolites
157.0768	158.094	M-H	91376	1-Methyl-2-oxopropyl butyrate	Endogenous;Food
157.0768	158.131	M-H	92111	1-Hydroxy-3-nonanone	Cosmetic;Endogenous;Food
157.0768	158.131	M-H	92132	3-(Hydroxymethyl)-2-octanone	Cosmetic;Endogenous;Food
157.0768	158.131	M-H	92813	2-Methylpropyl 3-methylbutanoate	Cosmetic;Endogenous;Food;TCM Ingredients
157.0768	158.131	M-H	93265	Octyl formate	Cosmetic;Endogenous;Food;TCM Ingredients
157.0768	158.131	M-H	93807	Butyl 2-methylbutanoate	Cosmetic;Endogenous;Food;Microbial Metabolites
157.0768	158.131	M-H	93810	1-Methylbutyl butanoate	Endogenous;Food
157.0768	158.131	M-H	94752	Isoamyl butyrate	Cosmetic;Endogenous;Food;Microbial Metabolites;TCM Ingredients;Toxins/Pollutant
157.0768	158.131	M-H	94819	Butyl pentanoate	Endogenous;Food
157.0768	158.131	M-H	94937	Isopropyl hexanoate	Cosmetic;Endogenous;Food
157.0768	158.094	M-H	2995	4-Oxovalproic acid	Drug Metabolite;Endogenous
157.0768	158.094	M-H	2990	3-Oxovalproic acid	Drug Metabolite;Endogenous
157.0768	158.094	M-H	86875	6-Ethyl-1-methyl-2,7,8-trioxabicyclo[3.2.1]octane	Endogenous;Food;Plant
NEG	540.33	5.34	0.035126	0.23929	0.87353	-0.19507	0.048371	0.27245	0.84918	-0.23586	9.774e-05	0.003077	0.71585	-0.48227	0.0051226	0.036208	0.4058	-1.3012	0.0095875	0.06487	0.46455	-1.1061	0.012858	0.089222	0.47787	-1.0653	0.027383	0.13063	0.56688	-0.81889
QueryMZ	MetlinMass	Adducts	MID	Common_name	Annotation
540.33	541.317	M-H	40316	PC(20:5(5Z,8Z,11Z,14Z,17Z)/0:0)	Endogenous;Food;Microbial Metabolites
NEG	607.404	7.9	0.035169	0.23929	1.4307	0.51671	0.95443	0.98689	1.092	0.12703	0.0053098	0.039673	0.68058	-0.55516	0.23621	0.44348	0.81265	-0.29929	0.037705	0.13609	0.56802	-0.816	0.33746	0.58007	0.74416	-0.42631	0.82449	0.92959	1.1941	0.25588
QueryMZ	MetlinMass	Adducts	MID	Common_name	Annotation
607.4042	608.392	M-H	86900	Torvoside G	Endogenous;Food
607.4042	608.444	M-H	58877	DG(18:4(6Z,9Z,12Z,15Z)/18:4(6Z,9Z,12Z,15Z)/0:0)	Endogenous;Food
607.4042	608.371	M-H	86486	2-O-Protocatechuoylalphitolic acid	Endogenous;Food
607.4042	608.392	M-H	86900	Torvoside G	Endogenous;Food
607.4042	608.371	M-H	90570	Avenestergenin A2	Endogenous;Food
607.4042	608.371	M-H	86486	2-O-Protocatechuoylalphitolic acid	Endogenous;Food
607.4042	608.371	M-H	90570	Avenestergenin A2	Endogenous;Food
NEG	541.333	5.34	0.035306	0.23929	0.8753	-0.19215	0.051591	0.27494	0.85431	-0.22716	6.3176e-05	0.0026949	0.70973	-0.49466	0.0049779	0.035707	0.39993	-1.3222	0.0092164	0.064744	0.4569	-1.13	0.011962	0.086672	0.46813	-1.095	0.027353	0.13063	0.56349	-0.82754
QueryMZ	MetlinMass	Adducts	MID	Common_name	Annotation
NEG	980.176	0.36	0.035331	0.23929	0.69381	-0.52739	0.00089841	0.066404	0.51582	-0.95505	0.0053555	0.039673	0.56321	-0.82826	0.062909	0.19551	0.63872	-0.64674	0.55134	0.73289	0.9206	-0.11935	0.47251	0.70032	1.2383	0.30831	0.72377	0.87387	1.1341	0.18152
QueryMZ	MetlinMass	Adducts	MID	Common_name	Annotation
NEG	525.339	5.51	0.035638	0.24042	0.75024	-0.41457	0.14376	0.47391	0.75704	-0.40156	0.0073657	0.046425	0.64606	-0.63025	0.019127	0.083587	0.45297	-1.1425	0.053757	0.17303	0.60377	-0.72792	0.10619	0.30341	0.59835	-0.74094	0.10944	0.30744	0.70113	-0.51224
QueryMZ	MetlinMass	Adducts	MID	Common_name	Annotation
525.3388	526.329	M-H	90682	(24E)-3alpha-Acetoxy-15alpha-hydroxy-23-oxo-7,9(11),24-lanostatrien-26-oic acid	Endogenous;Food;TCM Ingredients
525.3388	526.329	M-H	90683	(24E)-15alpha-Acetoxy-3alpha-hydroxy-23-oxo-7,9(11),24-lanostatrien-26-oic acid	Endogenous;Food;TCM Ingredients
525.3388	526.366	M-H	91713	3alpha-Acetomethoxy-11alpha-oxo-12-ursen-24-oic acid	Endogenous;Food
525.3388	526.329	M-H	90682	(24E)-3alpha-Acetoxy-15alpha-hydroxy-23-oxo-7,9(11),24-lanostatrien-26-oic acid	Endogenous;Food;TCM Ingredients
525.3388	526.329	M-H	90683	(24E)-15alpha-Acetoxy-3alpha-hydroxy-23-oxo-7,9(11),24-lanostatrien-26-oic acid	Endogenous;Food;TCM Ingredients
525.3388	526.366	M-H	91713	3alpha-Acetomethoxy-11alpha-oxo-12-ursen-24-oic acid	Endogenous;Food
NEG	760.504	8.29	0.035858	0.24094	0.65384	-0.613	0.42093	0.751	0.90624	-0.14204	0.016302	0.083175	0.63366	-0.65822	0.0011518	0.012798	0.47621	-1.0703	0.35213	0.55784	0.72833	-0.45733	0.040645	0.16452	0.52548	-0.92829	0.29227	0.56257	0.75152	-0.41211
QueryMZ	MetlinMass	Adducts	MID	Common_name	Annotation
760.5036	761.5	M-H	60408	PE(16:1(9Z)/22:6(4Z,7Z,10Z,13Z,16Z,19Z))	Endogenous;Food;Microbial Metabolites
760.5036	761.5	M-H	60511	PE(18:2(9Z,12Z)/20:5(5Z,8Z,11Z,14Z,17Z))	Endogenous;Food;Microbial Metabolites
760.5036	761.5	M-H	60542	PE(18:3(6Z,9Z,12Z)/20:4(5Z,8Z,11Z,14Z))	Endogenous;Food;Microbial Metabolites
760.5036	761.5	M-H	60543	PE(18:3(6Z,9Z,12Z)/20:4(8Z,11Z,14Z,17Z))	Endogenous;Food;Microbial Metabolites
760.5036	761.5	M-H	60574	PE(18:3(9Z,12Z,15Z)/20:4(5Z,8Z,11Z,14Z))	Endogenous;Food;Microbial Metabolites
760.5036	761.5	M-H	60575	PE(18:3(9Z,12Z,15Z)/20:4(8Z,11Z,14Z,17Z))	Endogenous;Food;Microbial Metabolites
760.5036	761.5	M-H	60605	PE(18:4(6Z,9Z,12Z,15Z)/20:3(5Z,8Z,11Z))	Endogenous;Food;Microbial Metabolites
760.5036	761.5	M-H	60606	PE(18:4(6Z,9Z,12Z,15Z)/20:3(8Z,11Z,14Z))	Endogenous;Food;Microbial Metabolites
760.5036	761.5	M-H	60723	PE(20:3(5Z,8Z,11Z)/18:4(6Z,9Z,12Z,15Z))	Endogenous;Food;Microbial Metabolites
760.5036	761.5	M-H	60756	PE(20:3(8Z,11Z,14Z)/18:4(6Z,9Z,12Z,15Z))	Endogenous;Food;Microbial Metabolites
760.5036	761.5	M-H	60787	PE(20:4(5Z,8Z,11Z,14Z)/18:3(6Z,9Z,12Z))	Endogenous;Food;Microbial Metabolites
760.5036	761.5	M-H	60788	PE(20:4(5Z,8Z,11Z,14Z)/18:3(9Z,12Z,15Z))	Endogenous;Food;Microbial Metabolites
760.5036	761.5	M-H	60820	PE(20:4(8Z,11Z,14Z,17Z)/18:3(6Z,9Z,12Z))	Endogenous;Food;Microbial Metabolites
760.5036	761.5	M-H	60821	PE(20:4(8Z,11Z,14Z,17Z)/18:3(9Z,12Z,15Z))	Endogenous;Food;Microbial Metabolites
760.5036	761.5	M-H	60852	PE(20:5(5Z,8Z,11Z,14Z,17Z)/18:2(9Z,12Z))	Endogenous;Food;Microbial Metabolites
760.5036	761.5	M-H	61072	PE(22:6(4Z,7Z,10Z,13Z,16Z,19Z)/16:1(9Z))	Endogenous;Food;Microbial Metabolites
760.5036	761.521	M-H	40809	PS(16:0/18:1(9Z))	Endogenous;Food;Microbial Metabolites
760.5036	761.521	M-H	77875	PS(16:1(9Z)/18:0)	Endogenous;Food;Microbial Metabolites
760.5036	761.521	M-H	78551	PS(18:0/16:1(9Z))	Endogenous;Food;Microbial Metabolites
760.5036	761.521	M-H	78623	PS(18:1(9Z)/16:0)	Endogenous;Food;Microbial Metabolites
760.5036	761.521	M-H	40793	PS(16:0/18:1(11Z))	Endogenous;Food;Microbial Metabolites
760.5036	761.521	M-H	77766	PS(14:0/20:1(11Z))	Endogenous;Food
760.5036	761.521	M-H	77791	PS(14:1(9Z)/20:0)	Endogenous;Food
760.5036	761.521	M-H	78175	PS(20:0/14:1(9Z))	Endogenous;Food
760.5036	761.521	M-H	78194	PS(20:1(11Z)/14:0)	Endogenous;Food
NEG	562.313	4.86	0.036951	0.24634	0.58311	-0.77815	0.033363	0.24216	0.53075	-0.9139	2.1737e-05	0.0022015	0.24219	-2.0458	3.2799e-07	2.6552e-05	0.061873	-4.0145	0.00016928	0.0039295	0.10611	-3.2364	0.00054868	0.019432	0.11658	-3.1006	0.00029723	0.010312	0.25547	-1.9688
QueryMZ	MetlinMass	Adducts	MID	Common_name	Annotation
NEG	606.301	4.96	0.0379	0.25054	0.67618	-0.56453	0.35024	0.70713	0.83413	-0.26165	0.00053068	0.0092058	0.48226	-1.0521	3.2271e-05	0.0011196	0.15817	-2.6605	9.1717e-05	0.0025148	0.23391	-2.096	0.00042435	0.016634	0.18962	-2.3988	0.00022372	0.0082679	0.32796	-1.6084
QueryMZ	MetlinMass	Adducts	MID	Common_name	Annotation
NEG	553.318	5.14	0.037963	0.25054	0.78585	-0.34768	0.0053644	0.11544	0.67583	-0.56526	4.2324e-05	0.0023984	0.55799	-0.84169	0.034087	0.12736	0.53543	-0.90124	0.11416	0.28786	0.68133	-0.55357	0.23554	0.47839	0.79224	-0.33598	0.45713	0.72426	0.95956	-0.059556
QueryMZ	MetlinMass	Adducts	MID	Common_name	Annotation
553.3179	554.361	M-H	90633	Ganoderic acid Me	Endogenous;Food;TCM Ingredients
553.3179	554.361	M-H	90893	Ganoderic acid R	Endogenous;Food;TCM Ingredients
553.3179	554.361	M-H	91772	(2xi,3xi)-2,3-Dihydroxy-12,18-ursadien-28-oic acid diacetate	Endogenous;Food
553.3179	554.345	M-H	93657	Notoginsenoside R10	Endogenous;Food;Plant;TCM Ingredients
553.3179	554.361	M-H	90633	Ganoderic acid Me	Endogenous;Food;TCM Ingredients
553.3179	554.361	M-H	90893	Ganoderic acid R	Endogenous;Food;TCM Ingredients
553.3179	554.361	M-H	91772	(2xi,3xi)-2,3-Dihydroxy-12,18-ursadien-28-oic acid diacetate	Endogenous;Food
553.3179	554.345	M-H	93657	Notoginsenoside R10	Endogenous;Food;Plant;TCM Ingredients
NEG	838.56	8.61	0.038288	0.25054	0.81314	-0.29842	0.00041651	0.047204	0.75002	-0.415	0.022622	0.10287	0.74615	-0.42246	0.16396	0.35965	0.87502	-0.19262	0.64464	0.79183	1.0761	0.1058	0.25704	0.50225	1.1667	0.22238	0.36037	0.62846	1.1727	0.22984
QueryMZ	MetlinMass	Adducts	MID	Common_name	Annotation
838.5602	839.547	M-H	60994	PE(22:4(7Z,10Z,13Z,16Z)/22:6(4Z,7Z,10Z,13Z,16Z,19Z))	Endogenous;Food;Microbial Metabolites
838.5602	839.547	M-H	61026	PE(22:5(4Z,7Z,10Z,13Z,16Z)/22:5(4Z,7Z,10Z,13Z,16Z))	Endogenous;Food;Microbial Metabolites
838.5602	839.547	M-H	61027	PE(22:5(4Z,7Z,10Z,13Z,16Z)/22:5(7Z,10Z,13Z,16Z,19Z))	Endogenous;Food;Microbial Metabolites
838.5602	839.547	M-H	61059	PE(22:5(7Z,10Z,13Z,16Z,19Z)/22:5(4Z,7Z,10Z,13Z,16Z))	Endogenous;Food;Microbial Metabolites
838.5602	839.547	M-H	61060	PE(22:5(7Z,10Z,13Z,16Z,19Z)/22:5(7Z,10Z,13Z,16Z,19Z))	Endogenous;Food;Microbial Metabolites
838.5602	839.547	M-H	61091	PE(22:6(4Z,7Z,10Z,13Z,16Z,19Z)/22:4(7Z,10Z,13Z,16Z))	Endogenous;Food;Microbial Metabolites
838.5602	839.568	M-H	78028	PS(18:2(9Z,12Z)/22:2(13Z,16Z))	Endogenous;Food
838.5602	839.568	M-H	78115	PS(18:4(6Z,9Z,12Z,15Z)/22:0)	Endogenous;Food
838.5602	839.568	M-H	78526	PS(20:0/20:4(5Z,8Z,11Z,14Z))	Endogenous;Food
838.5602	839.568	M-H	78213	PS(20:1(11Z)/20:3(8Z,11Z,14Z))	Endogenous;Food
838.5602	839.568	M-H	78243	PS(20:2(11Z,14Z)/20:2(11Z,14Z))	Endogenous;Food
838.5602	839.568	M-H	78273	PS(20:3(8Z,11Z,14Z)/20:1(11Z))	Endogenous;Food
838.5602	839.568	M-H	78302	PS(20:4(5Z,8Z,11Z,14Z)/20:0)	Endogenous;Food
838.5602	839.568	M-H	78377	PS(22:0/18:4(6Z,9Z,12Z,15Z))	Endogenous;Food
838.5602	839.568	M-H	78433	PS(22:2(13Z,16Z)/18:2(9Z,12Z))	Endogenous;Food
838.5602	839.568	M-H	78462	PS(22:4(7Z,10Z,13Z,16Z)/18:0)	Endogenous;Food
NEG	593.364	5.66	0.040433	0.25704	0.65941	-0.60075	0.017089	0.18341	0.54206	-0.88347	0.00047311	0.0087422	0.38903	-1.3621	0.00017421	0.0032173	0.1694	-2.5615	0.00067014	0.010725	0.25689	-1.9608	0.0056442	0.057114	0.31251	-1.678	0.0118	0.082896	0.43544	-1.1994
QueryMZ	MetlinMass	Adducts	MID	Common_name	Annotation
593.3638	594.342	M-H	7022	L-Urobilin	Endogenous;Food
593.3638	594.371	M-H	91872	7,8-Dehydroastaxanthianthin	Endogenous;Food;Plant;TCM Ingredients
593.3638	594.392	M-H	93737	Hericenone E	Endogenous;Food;Plant;TCM Ingredients
593.3638	594.392	M-H	94153	Hericenone H	Endogenous;Food;Plant;TCM Ingredients
593.3638	594.371	M-H	91872	7,8-Dehydroastaxanthianthin	Endogenous;Food;Plant;TCM Ingredients
NEG	403.945	0.42	0.040548	0.25704	0.91646	-0.12586	0.066276	0.307	1.1119	0.15302	0.0053742	0.039673	1.2041	0.26799	0.74778	0.86185	0.98485	-0.022029	0.3169	0.53065	1.0746	0.10383	0.14033	0.35342	0.88573	-0.17505	0.030104	0.13335	0.81789	-0.29002
QueryMZ	MetlinMass	Adducts	MID	Common_name	Annotation
NEG	671.101	0.36	0.040673	0.25704	1.1583	0.21206	0.82921	0.94986	0.98083	-0.027929	0.90704	0.95774	0.99145	-0.012388	0.056265	0.18219	0.81519	-0.2948	0.0012805	0.017843	0.70375	-0.50686	0.031931	0.13883	0.83112	-0.26687	0.074435	0.23696	0.82222	-0.28241
QueryMZ	MetlinMass	Adducts	MID	Common_name	Annotation
NEG	1105.65	5.34	0.040837	0.25712	0.78418	-0.35075	0.084233	0.35357	0.82803	-0.27225	0.076674	0.23111	0.78999	-0.3401	0.0078299	0.046174	0.39509	-1.3398	0.024015	0.10687	0.50382	-0.98901	0.017895	0.098453	0.47714	-1.0675	0.027808	0.13095	0.50012	-0.99966
QueryMZ	MetlinMass	Adducts	MID	Common_name	Annotation
NEG	592.361	5.66	0.041337	0.25849	0.66852	-0.58097	0.040985	0.256	0.59243	-0.75529	0.00030698	0.0061203	0.40363	-1.3089	3.8403e-05	0.001223	0.11712	-3.094	0.00027198	0.0054396	0.17519	-2.513	0.0021072	0.03512	0.19769	-2.3387	0.0016969	0.027973	0.29015	-1.7851
QueryMZ	MetlinMass	Adducts	MID	Common_name	Annotation
NEG	553.369	6.14	0.041358	0.25849	0.68027	-0.55581	0.11041	0.40716	0.74121	-0.43204	0.051498	0.17267	0.72591	-0.46214	0.0072025	0.04449	0.35602	-1.49	0.036648	0.13341	0.52336	-0.93414	0.026217	0.12354	0.48033	-1.0579	0.018811	0.10936	0.49046	-1.0278
QueryMZ	MetlinMass	Adducts	MID	Common_name	Annotation
553.3691	554.361	M-H	90633	Ganoderic acid Me	Endogenous;Food;TCM Ingredients
553.3691	554.361	M-H	90893	Ganoderic acid R	Endogenous;Food;TCM Ingredients
553.3691	554.361	M-H	91772	(2xi,3xi)-2,3-Dihydroxy-12,18-ursadien-28-oic acid diacetate	Endogenous;Food
553.3691	554.345	M-H	93657	Notoginsenoside R10	Endogenous;Food;Plant;TCM Ingredients
553.3691	554.361	M-H	90633	Ganoderic acid Me	Endogenous;Food;TCM Ingredients
553.3691	554.361	M-H	90893	Ganoderic acid R	Endogenous;Food;TCM Ingredients
553.3691	554.361	M-H	91772	(2xi,3xi)-2,3-Dihydroxy-12,18-ursadien-28-oic acid diacetate	Endogenous;Food
553.3691	554.345	M-H	93657	Notoginsenoside R10	Endogenous;Food;Plant;TCM Ingredients
NEG	530.898	0.33	0.042059	0.2619	1.2429	0.31371	0.00081352	0.065856	1.4005	0.48595	0.0045919	0.036925	1.3104	0.39006	0.38807	0.59012	0.89872	-0.15406	0.048387	0.16035	0.72308	-0.46777	0.0069649	0.065206	0.64171	-0.64001	0.016278	0.10323	0.68581	-0.54412
QueryMZ	MetlinMass	Adducts	MID	Common_name	Annotation
NEG	359.188	4.16	0.043461	0.26867	0.48627	-1.0402	0.21141	0.55721	0.66305	-0.5928	0.029012	0.11885	0.41607	-1.2651	0.00072807	0.0091009	0.17669	-2.5007	0.00025356	0.0051934	0.36336	-1.4605	0.17012	0.39337	0.26648	-1.9079	0.060529	0.20446	0.42467	-1.2356
QueryMZ	MetlinMass	Adducts	MID	Common_name	Annotation
359.188	360.194	M-H	418	Aldosterone	Drug;Endogenous;Food;Microbial Metabolites;TCM Ingredients
359.188	360.194	M-H	271	Cortisone	Cosmetic;Drug;Endogenous;Food;TCM Ingredients
359.188	360.23	M-H	36435	Neuroprotectin D1	Drug;Endogenous;Food
359.188	360.23	M-H	36434	Resolvin D5	Endogenous;Food
359.188	360.194	M-H	2065	prednisolone	Carcinogenic Potency;Cosmetic;Drug;Drug Metabolite;Endogenous;Food;TCM Ingredients
359.188	360.191	M-H	85635	Arginyl-Tryptophan	Endogenous
359.188	360.191	M-H	85970	Tryptophyl-Arginine	Endogenous
359.188	360.194	M-H	68527	Tricyclodehydroisohumulone	Endogenous;Food;Plant;TCM Ingredients
359.188	360.231	M-H	67425	Calycanthidine	Endogenous;Food;Plant;TCM Ingredients
359.188	360.23	M-H	86989	Macrophorin A	Endogenous;Food;Plant;TCM Ingredients
359.188	360.194	M-H	91043	7-Methylrosmanol	Endogenous;Food;TCM Ingredients
359.188	360.157	M-H	92200	Quassinol	Endogenous;Food
359.188	360.194	M-H	68527	Tricyclodehydroisohumulone	Endogenous;Food;Plant;TCM Ingredients
359.188	360.231	M-H	67425	Calycanthidine	Endogenous;Food;Plant;TCM Ingredients
359.188	360.194	M-H	418	Aldosterone	Drug;Endogenous;Food;Microbial Metabolites;TCM Ingredients
NEG	188.986	0.8	0.043888	0.2697	0.44103	-1.181	0.18081	0.52186	0.62845	-0.67012	0.002228	0.025334	0.29801	-1.7465	0.00033809	0.0051317	0.098248	-3.3474	0.086996	0.24496	0.22277	-2.1664	0.03553	0.15039	0.15633	-2.6773	0.027432	0.13063	0.32968	-1.6009
QueryMZ	MetlinMass	Adducts	MID	Common_name	Annotation
188.9864	190.011	M-H	3326	Oxalosuccinic acid	Endogenous;Food;Microbial Metabolites;Plant
188.9864	189.994	M-H	1829	Pyrocatechol sulfate	Endogenous
188.9864	189.994	M-H	1829	Pyrocatechol sulfate	Endogenous
NEG	543.338	5.34	0.04523	0.2756	0.84592	-0.24142	0.0581	0.28904	0.82878	-0.27093	0.00033553	0.0064818	0.6667	-0.58488	0.0027627	0.024982	0.36921	-1.4375	0.0055319	0.050834	0.43647	-1.1961	0.0074919	0.068474	0.44549	-1.1665	0.021883	0.11589	0.55379	-0.85259
QueryMZ	MetlinMass	Adducts	MID	Common_name	Annotation
543.338	544.376	M-H	90640	Ganoderic acid Mi	Endogenous;Food;Plant;TCM Ingredients
543.338	544.376	M-H	90654	Ganoderic acid Mj	Endogenous;Food;TCM Ingredients
543.338	544.34	M-H	95461	Hovenidulcigenin A	Endogenous;Food
543.338	544.376	M-H	90640	Ganoderic acid Mi	Endogenous;Food;Plant;TCM Ingredients
543.338	544.376	M-H	90654	Ganoderic acid Mj	Endogenous;Food;TCM Ingredients
543.338	544.34	M-H	95461	Hovenidulcigenin A	Endogenous;Food
NEG	480.309	5.34	0.046161	0.28026	0.8667	-0.2064	0.054451	0.27998	0.85026	-0.23403	0.0001421	0.0038962	0.70564	-0.50299	0.0056014	0.038089	0.40284	-1.3117	0.010684	0.067269	0.4648	-1.1053	0.013026	0.090015	0.47378	-1.0777	0.030274	0.13335	0.57088	-0.80874
QueryMZ	MetlinMass	Adducts	MID	Common_name	Annotation
480.309	481.317	M-H	40282	PC(15:0/0:0)	Endogenous;Food;Microbial Metabolites
480.309	481.317	M-H	40379	PC(15:0/0:0)[U]	Endogenous;Food;Microbial Metabolites
480.309	481.317	M-H	61691	LysoPC(15:0)	Endogenous;Food;Microbial Metabolites
480.309	481.317	M-H	61992	LysoPE(0:0/18:0)	Endogenous;Food
480.309	481.317	M-H	40775	PE(18:0/0:0)	Endogenous;Food;Microbial Metabolites
480.309	481.317	M-H	40282	PC(15:0/0:0)	Endogenous;Food;Microbial Metabolites
480.309	481.317	M-H	40379	PC(15:0/0:0)[U]	Endogenous;Food;Microbial Metabolites
NEG	256.085	2.61	0.046907	0.28277	0.59279	-0.75441	0.02492	0.21278	0.52161	-0.93896	0.0015221	0.020375	0.36756	-1.4439	0.029575	0.11436	0.43236	-1.2097	0.24302	0.46576	0.72937	-0.45528	0.44397	0.67502	0.8289	-0.27074	0.99035	0.99748	1.1763	0.23424
QueryMZ	MetlinMass	Adducts	MID	Common_name	Annotation
256.0853	257.103	M-H	370	Glycerophosphocholine	Cosmetic;Endogenous;Food;Microbial Metabolites;TCM Ingredients
256.0853	257.112	M-H	5890	Tetrahydroneopterin	Endogenous;Food
256.0853	257.101	M-H	5919	5-Methylcytidine	Endogenous;Food;TCM Ingredients
256.0853	257.103	M-H	370	Glycerophosphocholine	Cosmetic;Endogenous;Food;Microbial Metabolites;TCM Ingredients
NEG	814.556	8.68	0.047343	0.28363	0.73279	-0.44854	0.3178	0.68093	0.84417	-0.2444	0.056669	0.18526	0.64561	-0.63126	0.00081915	0.0098762	0.32074	-1.6405	0.006174	0.05355	0.4377	-1.192	0.015678	0.094179	0.37995	-1.3961	0.10664	0.30165	0.49679	-1.0093
QueryMZ	MetlinMass	Adducts	MID	Common_name	Annotation
814.5559	815.583	M-H	60199	PC(22:6(4Z,7Z,10Z,13Z,16Z,19Z)/P-18:1(11Z))	Endogenous;Food;Microbial Metabolites
814.5559	815.583	M-H	60200	PC(22:6(4Z,7Z,10Z,13Z,16Z,19Z)/P-18:1(9Z))	Endogenous;Food;Microbial Metabolites
814.5559	815.547	M-H	60705	PE(20:2(11Z,14Z)/22:6(4Z,7Z,10Z,13Z,16Z,19Z))	Endogenous;Food;Microbial Metabolites
814.5559	815.547	M-H	60736	PE(20:3(5Z,8Z,11Z)/22:5(4Z,7Z,10Z,13Z,16Z))	Endogenous;Food;Microbial Metabolites
814.5559	815.547	M-H	60737	PE(20:3(5Z,8Z,11Z)/22:5(7Z,10Z,13Z,16Z,19Z))	Endogenous;Food;Microbial Metabolites
814.5559	815.547	M-H	60769	PE(20:3(8Z,11Z,14Z)/22:5(4Z,7Z,10Z,13Z,16Z))	Endogenous;Food;Microbial Metabolites
814.5559	815.547	M-H	60770	PE(20:3(8Z,11Z,14Z)/22:5(7Z,10Z,13Z,16Z,19Z))	Endogenous;Food;Microbial Metabolites
814.5559	815.547	M-H	60801	PE(20:4(5Z,8Z,11Z,14Z)/22:4(7Z,10Z,13Z,16Z))	Endogenous;Food;Microbial Metabolites
814.5559	815.547	M-H	60834	PE(20:4(8Z,11Z,14Z,17Z)/22:4(7Z,10Z,13Z,16Z))	Endogenous;Food;Microbial Metabolites
814.5559	815.547	M-H	60985	PE(22:4(7Z,10Z,13Z,16Z)/20:4(5Z,8Z,11Z,14Z))	Endogenous;Food;Microbial Metabolites
814.5559	815.547	M-H	60986	PE(22:4(7Z,10Z,13Z,16Z)/20:4(8Z,11Z,14Z,17Z))	Endogenous;Food;Microbial Metabolites
814.5559	815.547	M-H	61017	PE(22:5(4Z,7Z,10Z,13Z,16Z)/20:3(5Z,8Z,11Z))	Endogenous;Food;Microbial Metabolites
814.5559	815.547	M-H	61018	PE(22:5(4Z,7Z,10Z,13Z,16Z)/20:3(8Z,11Z,14Z))	Endogenous;Food;Microbial Metabolites
814.5559	815.547	M-H	61050	PE(22:5(7Z,10Z,13Z,16Z,19Z)/20:3(5Z,8Z,11Z))	Endogenous;Food;Microbial Metabolites
814.5559	815.547	M-H	61051	PE(22:5(7Z,10Z,13Z,16Z,19Z)/20:3(8Z,11Z,14Z))	Endogenous;Food;Microbial Metabolites
814.5559	815.547	M-H	61082	PE(22:6(4Z,7Z,10Z,13Z,16Z,19Z)/20:2(11Z,14Z))	Endogenous;Food;Microbial Metabolites
814.5559	815.583	M-H	62115	PC(P-18:1(11Z)/22:6(4Z,7Z,10Z,13Z,16Z,19Z))	Endogenous;Food
814.5559	815.583	M-H	62144	PC(P-18:1(9Z)/22:6(4Z,7Z,10Z,13Z,16Z,19Z))	Endogenous;Food
814.5559	815.568	M-H	77864	PS(16:0/22:2(13Z,16Z))	Endogenous;Food
814.5559	815.568	M-H	78624	PS(18:0/20:2(11Z,14Z))	Endogenous;Food
814.5559	815.568	M-H	78620	PS(18:1(9Z)/20:1(11Z))	Endogenous;Food
814.5559	815.568	M-H	78020	PS(18:2(9Z,12Z)/20:0)	Endogenous;Food
814.5559	815.568	M-H	78614	PS(20:0/18:2(9Z,12Z))	Endogenous;Food
814.5559	815.568	M-H	78204	PS(20:1(11Z)/18:1(9Z))	Endogenous;Food
814.5559	815.568	M-H	78233	PS(20:2(11Z,14Z)/18:0)	Endogenous;Food
814.5559	815.568	M-H	78426	PS(22:2(13Z,16Z)/16:0)	Endogenous;Food
NEG	642.258	5.34	0.047382	0.28363	0.86928	-0.20211	0.4368	0.76238	1.0349	0.049467	0.15922	0.37805	0.92724	-0.10899	0.0049763	0.035707	0.63576	-0.65344	0.033997	0.12872	0.73137	-0.45133	0.0026716	0.037535	0.61433	-0.7029	0.010811	0.080848	0.68566	-0.54445
QueryMZ	MetlinMass	Adducts	MID	Common_name	Annotation
NEG	414.987	0.35	0.047949	0.28438	1.1467	0.19755	0.027266	0.22284	1.1664	0.22206	0.018364	0.08819	1.1958	0.258	0.088351	0.24877	0.81169	-0.301	0.0051007	0.048173	0.70782	-0.49854	0.0036216	0.045576	0.6959	-0.52305	0.0031671	0.038458	0.67877	-0.559
QueryMZ	MetlinMass	Adducts	MID	Common_name	Annotation
NEG	357.026	0.35	0.048185	0.28438	1.0635	0.088869	0.12681	0.43996	1.0531	0.074576	0.074855	0.2262	1.0699	0.09754	0.04082	0.14457	0.89538	-0.15943	0.00136	0.018349	0.84189	-0.2483	0.0037533	0.045576	0.85027	-0.23401	0.0034805	0.041377	0.83684	-0.25697
QueryMZ	MetlinMass	Adducts	MID	Common_name	Annotation
357.0255	358.069	M-H	51433	5,4'-Dihydroxy-3,3'-dimethoxy-6,7-methylenedioxyflavone	Endogenous;Food
357.0255	358.039	M-H	2915	4-Hydroxytriazolam	Drug Metabolite;Endogenous
357.0255	358.039	M-H	2914	&alpha;-Hydroxytriazolam	Drug Metabolite;Endogenous
NEG	630.301	4.86	0.04916	0.2862	0.60712	-0.71995	0.022702	0.21114	0.57041	-0.80994	0.00025776	0.0055855	0.38148	-1.3903	7.0269e-06	0.00031436	0.1422	-2.814	0.003711	0.038054	0.23422	-2.094	0.00098872	0.025087	0.2493	-2.0041	0.0014655	0.026348	0.37277	-1.4237
QueryMZ	MetlinMass	Adducts	MID	Common_name	Annotation
NEG	1025.63	5.34	0.05032	0.29097	0.84311	-0.24621	0.1118	0.40962	0.85746	-0.22186	0.00061625	0.010271	0.657	-0.60604	0.014658	0.069029	0.40357	-1.3091	0.024516	0.10797	0.47867	-1.0629	0.024424	0.11829	0.47066	-1.0872	0.06656	0.21891	0.61427	-0.70306
QueryMZ	MetlinMass	Adducts	MID	Common_name	Annotation
NEG	539.317	4.97	0.053118	0.30047	0.63524	-0.65463	0.2726	0.63051	0.75858	-0.39863	0.0022114	0.025334	0.43423	-1.2035	0.00017662	0.0032173	0.1335	-2.9051	0.00022178	0.0047128	0.21016	-2.2504	0.00035764	0.015589	0.17599	-2.5064	0.0015496	0.026881	0.30744	-1.7016
QueryMZ	MetlinMass	Adducts	MID	Common_name	Annotation
NEG	1035.66	5.34	0.053187	0.30047	0.8267	-0.27457	0.038333	0.25555	0.77695	-0.3641	7.3401e-05	0.0026949	0.58022	-0.78534	0.0075524	0.045136	0.27272	-1.8745	0.011935	0.07144	0.32989	-1.5999	0.015258	0.094059	0.35101	-1.5104	0.0312	0.13635	0.47003	-1.0892
QueryMZ	MetlinMass	Adducts	MID	Common_name	Annotation
NEG	284.776	0.33	0.055292	0.31022	1.2084	0.27315	0.019626	0.19859	1.2209	0.2879	0.043781	0.15735	1.1992	0.26204	0.0174	0.078881	0.63059	-0.66523	0.0021316	0.025165	0.52182	-0.93838	0.0011289	0.027145	0.51651	-0.95313	0.0017113	0.027973	0.52585	-0.92728
QueryMZ	MetlinMass	Adducts	MID	Common_name	Annotation
NEG	1036.67	5.34	0.05554	0.31059	0.81846	-0.28901	0.029186	0.22864	0.75302	-0.40923	0.0001531	0.0041312	0.57278	-0.80395	0.0066152	0.042437	0.27583	-1.8581	0.010514	0.067215	0.33702	-1.5691	0.014418	0.093551	0.3663	-1.4489	0.028763	0.13251	0.48157	-1.0542
QueryMZ	MetlinMass	Adducts	MID	Common_name	Annotation
NEG	255.085	2.62	0.056439	0.31386	0.60608	-0.72242	0.033759	0.24216	0.53261	-0.90884	0.0024559	0.027242	0.3662	-1.4493	0.02973	0.11461	0.46531	-1.1037	0.33486	0.54528	0.76774	-0.3813	0.66748	0.84178	0.87364	-0.19488	0.58791	0.81389	1.2707	0.34558
QueryMZ	MetlinMass	Adducts	MID	Common_name	Annotation
255.0854	256.074	M-H	47951	Dihydrodaidzein	Endogenous;Food;Plant
255.0854	256.106	M-H	62397	1-(beta-D-Ribofuranosyl)-1,4-dihydronicotinamide	Endogenous;Food
255.0854	256.117	M-H	85801	Histidinyl-Threonine	Endogenous
255.0854	256.117	M-H	85956	Threoninyl-Histidine	Endogenous
255.0854	256.074	M-H	86286	(E)-2,4,4'-Trihydroxychalcone	Endogenous;Food;TCM Ingredients
255.0854	256.11	M-H	67151	Xenognosin A	Endogenous;Food;Plant;TCM Ingredients
255.0854	256.074	M-H	44418	Pinocembrin	Endogenous;Food;Plant;TCM Ingredients
255.0854	256.058	M-H	43637	PISCIDIC ACID	Endogenous;Food;Plant;TCM Ingredients
255.0854	256.131	M-H	87929	1-Methoxy-1-(2,4,5-trimethoxyphenyl)-2-propanol	Endogenous;Food;Plant
255.0854	256.074	M-H	88538	4'-Methoxybenzophenone-2-carboxylic acid	Endogenous;Food
255.0854	256.11	M-H	52246	1-(2-hydroxy-4-methoxyphenyl)-3-phenylpropan-1-one	Endogenous
255.0854	256.11	M-H	52246	2'-Hydroxy-4'-methoxy-3-phenylpropiophenone	Endogenous
255.0854	256.074	M-H	48118	8,17-dioxatetracyclo[8.7.0.0?,?.0??,??]heptadeca-2(7),3,5,11(16),12,14-hexaene-5,14-diol	Endogenous
255.0854	256.074	M-H	48118	Demethylmedicarpin	Endogenous
255.0854	256.074	M-H	44418	(2S)-5,7-dihydroxy-2-phenyl-3,4-dihydro-2H-1-benzopyran-4-one	Endogenous;Food;Plant;TCM Ingredients
255.0854	256.074	M-H	44418	Pinocembrin	Endogenous;Food;Plant;TCM Ingredients
255.0854	256.058	M-H	43637	PISCIDIC ACID	Endogenous;Food;Plant;TCM Ingredients
255.0854	256.131	M-H	87929	1-Methoxy-1-(2,4,5-trimethoxyphenyl)-2-propanol	Endogenous;Food;Plant
NEG	991.567	9.19	0.05668	0.31386	1.23	0.2987	0.098334	0.38166	1.3174	0.39767	4.0387e-05	0.0023984	1.5754	0.6557	0.0030865	0.027189	1.6566	0.72819	0.075022	0.21894	1.3468	0.4295	0.22276	0.46086	1.2575	0.33052	0.79395	0.91074	1.0515	0.072495
QueryMZ	MetlinMass	Adducts	MID	Common_name	Annotation
NEG	696.43	6.76	0.057012	0.31395	0.6948	-0.52533	0.00010321	0.021932	0.39296	-1.3476	1.6634e-05	0.0022015	0.28392	-1.8164	2.3459e-07	2.2155e-05	0.047854	-4.3852	1.1007e-06	0.00012475	0.068874	-3.8599	1.6855e-06	0.0014327	0.12178	-3.0377	1.375e-05	0.00093499	0.16855	-2.5688
QueryMZ	MetlinMass	Adducts	MID	Common_name	Annotation
696.43	697.468	M-H	60341	PE(15:0/18:4(6Z,9Z,12Z,15Z))	Endogenous;Food;Microbial Metabolites
696.43	697.468	M-H	60592	PE(18:4(6Z,9Z,12Z,15Z)/15:0)	Endogenous;Food;Microbial Metabolites
NEG	530.302	5.34	0.057065	0.31395	0.89286	-0.16349	0.028524	0.22732	0.8681	-0.20407	5.5062e-05	0.0026949	0.75622	-0.40312	0.0046568	0.034721	0.44049	-1.1828	0.0099298	0.065742	0.49334	-1.0193	0.011985	0.086672	0.50741	-0.97876	0.024951	0.12599	0.58248	-0.77971
QueryMZ	MetlinMass	Adducts	MID	Common_name	Annotation
NEG	609.32	5.33	0.063381	0.33718	0.8893	-0.16925	0.015721	0.17523	0.8912	-0.16618	0.0071153	0.045645	0.81406	-0.2968	0.0068806	0.043645	0.50234	-0.99325	0.016876	0.086154	0.56487	-0.824	0.014161	0.093306	0.56367	-0.82707	0.031989	0.13873	0.61709	-0.69646
QueryMZ	MetlinMass	Adducts	MID	Common_name	Annotation
609.3204	610.29	M-H	58308	Endomorphin-1	Endogenous;Food
NEG	264.105	1.92	0.06451	0.34058	0.47542	-1.0727	0.33751	0.69855	1.5401	0.62302	0.19362	0.42914	1.3872	0.47222	0.058445	0.18818	0.41015	-1.2858	0.77359	0.86749	0.86271	-0.21305	0.016267	0.094945	0.26631	-1.9088	0.0023387	0.032624	0.29566	-1.758
QueryMZ	MetlinMass	Adducts	MID	Common_name	Annotation
264.1048	265.11	M-H	67613	(-)-Annonaine	Endogenous;Food;Plant;TCM Ingredients
264.1048	265.074	M-H	88374	Hydroxypropyl cellulose	Cosmetic;Drug;Endogenous;Food
264.1048	265.074	M-H	88374	Hydroxypropyl cellulose	Cosmetic;Drug;Endogenous;Food
264.1048	265.11	M-H	67613	(-)-Annonaine	Endogenous;Food;Plant;TCM Ingredients
NEG	1103.65	5.34	0.065447	0.34446	0.85408	-0.22755	0.039033	0.256	0.82472	-0.27802	0.0012843	0.017896	0.69843	-0.51782	0.0084283	0.04776	0.3526	-1.5039	0.015044	0.08119	0.41284	-1.2763	0.017618	0.097878	0.42754	-1.2259	0.033218	0.14083	0.50485	-0.98606
QueryMZ	MetlinMass	Adducts	MID	Common_name	Annotation
NEG	670.288	5.96	0.066462	0.34872	0.82424	-0.27887	0.14114	0.46955	0.85231	-0.23056	0.037498	0.14293	0.8219	-0.28297	0.0067199	0.042786	0.54935	-0.86422	0.038641	0.13829	0.66649	-0.58535	0.035832	0.15078	0.64454	-0.63366	0.028934	0.13258	0.66839	-0.58124
QueryMZ	MetlinMass	Adducts	MID	Common_name	Annotation
NEG	617.364	5.55	0.067327	0.35142	1.4206	0.50647	0.15817	0.49424	0.7806	-0.35735	0.031914	0.12617	0.72558	-0.46279	0.0017544	0.01796	0.4429	-1.1749	0.0010821	0.015858	0.31178	-1.6814	0.10673	0.30401	0.56739	-0.81758	0.046664	0.17473	0.61041	-0.71214
QueryMZ	MetlinMass	Adducts	MID	Common_name	Annotation
617.3639	618.413	M-H	89885	19-Methoxypomolic acid 3-arabinoside	Endogenous;Food
617.3639	618.392	M-H	90005	3-O-cis-Coumaroylmaslinic acid	Endogenous;Food;TCM Ingredients
617.3639	618.413	M-H	90443	Lansioside B	Endogenous;Food;Plant;TCM Ingredients
617.3639	618.413	M-H	90713	Momordicoside I	Endogenous;Food;Plant;TCM Ingredients
617.3639	618.392	M-H	91444	3-O-p-trans-Coumaroylalphitolic acid	Endogenous;Food;TCM Ingredients
617.3639	618.392	M-H	94987	cis-p-Coumaroylcorosolic acid	Endogenous;Food
617.3639	618.413	M-H	89885	19-Methoxypomolic acid 3-arabinoside	Endogenous;Food
617.3639	618.413	M-H	90713	Momordicoside I	Endogenous;Food;Plant;TCM Ingredients
617.3639	618.392	M-H	91444	3-O-p-trans-Coumaroylalphitolic acid	Endogenous;Food;TCM Ingredients
617.3639	618.392	M-H	94987	cis-p-Coumaroylcorosolic acid	Endogenous;Food
NEG	270.799	0.33	0.069277	0.35564	1.3712	0.45543	0.0026923	0.091669	1.8522	0.88923	0.0020382	0.024401	1.9627	0.97282	0.43644	0.62767	0.84679	-0.23992	0.051749	0.16853	0.61756	-0.69535	0.0080266	0.071441	0.45719	-1.1291	0.0067333	0.061541	0.43145	-1.2127
QueryMZ	MetlinMass	Adducts	MID	Common_name	Annotation
NEG	446.228	4.78	0.071529	0.36261	0.7077	-0.49879	0.3045	0.66761	0.81871	-0.28857	0.20425	0.44008	0.76561	-0.38532	0.0078051	0.046174	0.46907	-1.0921	0.020652	0.095664	0.66281	-0.59332	0.0042758	0.049448	0.57294	-0.80354	0.054005	0.19047	0.61268	-0.70679
QueryMZ	MetlinMass	Adducts	MID	Common_name	Annotation
NEG	669.289	5.96	0.071668	0.36261	0.85505	-0.22592	0.093121	0.36978	0.81811	-0.28963	0.0047114	0.037081	0.75404	-0.40728	0.0048566	0.035303	0.51784	-0.94942	0.013686	0.076788	0.60563	-0.72349	0.043444	0.17058	0.63297	-0.65978	0.040498	0.16011	0.68675	-0.54214
QueryMZ	MetlinMass	Adducts	MID	Common_name	Annotation
NEG	474.941	0.34	0.072675	0.36542	1.1898	0.25067	0.014467	0.16995	1.3148	0.39488	0.0028328	0.028941	1.3864	0.47135	0.10416	0.27172	0.7586	-0.39859	0.0095113	0.06487	0.6376	-0.64927	0.0041371	0.048268	0.57695	-0.79348	0.0016628	0.027973	0.54717	-0.86995
QueryMZ	MetlinMass	Adducts	MID	Common_name	Annotation
NEG	357.833	12.88	0.073069	0.36542	0.85911	-0.21908	0.78514	0.93338	0.9727	-0.039939	0.90173	0.95689	1.0043	0.0061747	0.59295	0.75169	1.0363	0.051425	0.0021244	0.025165	1.2062	0.27051	0.31801	0.56491	1.0654	0.091364	0.56244	0.79151	1.0319	0.045251
QueryMZ	MetlinMass	Adducts	MID	Common_name	Annotation
NEG	478.293	5.47	0.074039	0.36735	1.4361	0.52212	0.20455	0.55372	0.78508	-0.34909	0.013591	0.072201	0.56402	-0.82618	5.7324e-05	0.0014765	0.19715	-2.3427	2.0557e-05	0.0009266	0.13728	-2.8648	0.00070743	0.02139	0.25112	-1.9936	0.0034248	0.041001	0.34954	-1.5165
QueryMZ	MetlinMass	Adducts	MID	Common_name	Annotation
478.2932	479.338	M-H	40402	PC(P-16:0/0:0)	Endogenous;Food;Microbial Metabolites
478.2932	479.338	M-H	61716	LysoPC(P-16:0)	Endogenous;Food;Microbial Metabolites
478.2932	479.301	M-H	62263	LysoPE(0:0/18:1(11Z))	Endogenous;Food
478.2932	479.301	M-H	62264	LysoPE(0:0/18:1(9Z))	Endogenous;Food
478.2932	479.301	M-H	62291	LysoPE(18:1(11Z)/0:0)	Endogenous;Food
478.2932	479.301	M-H	40778	PE(18:1(9Z)/0:0)	Endogenous;Food;Microbial Metabolites
478.2932	479.267	M-H	93240	PC-M5'	Endogenous;Food;TCM Ingredients
478.2932	479.338	M-H	40402	PC(P-16:0/0:0)	Endogenous;Food;Microbial Metabolites
478.2932	479.267	M-H	93240	PC-M5'	Endogenous;Food;TCM Ingredients
NEG	263.103	1.92	0.07511	0.36849	0.48731	-1.0371	0.26018	0.61871	1.5866	0.66594	0.16746	0.38999	1.5005	0.58543	0.071681	0.2153	0.4273	-1.2267	0.8267	0.89802	0.87686	-0.18958	0.013572	0.090836	0.26932	-1.8926	0.0046861	0.04979	0.28477	-1.8121
QueryMZ	MetlinMass	Adducts	MID	Common_name	Annotation
263.1031	264.078	M-H	6656	N-Acetylcystathionine	Endogenous;Food
263.1031	264.111	M-H	44788	AFMK	Endogenous;Food
263.1031	264.111	M-H	58397	Alpha-N-Phenylacetyl-L-glutamine	Endogenous;Food;Microbial Metabolites
263.1031	264.111	M-H	58397	Alpha-N-Phenylacetyl-L-glutamine	Endogenous;Food;Microbial Metabolitess
263.1031	264.078	M-H	85673	Aspartyl-Methionine	Endogenous
263.1031	264.078	M-H	85871	Methionyl-Aspartate	Endogenous
263.1031	264.147	M-H	85906	Phenylalanyl-Valine	Endogenous
263.1031	264.147	M-H	86026	Valyl-Phenylalanine	Endogenous
263.1031	264.136	M-H	86721	Hulupinic acid	Endogenous;Food
263.1031	264.09	M-H	67538	Perlolyrine	Endogenous;Food;Plant;TCM Ingredients
263.1031	264.157	M-H	87864	Hexyl glucoside	Endogenous;Food;Plant;TCM Ingredients
263.1031	264.151	M-H	87991	1,7-Diphenyl-4-hepten-3-one	Endogenous;Food;TCM Ingredients
263.1031	264.136	M-H	88083	Heliespirone A	Endogenous;Food
263.1031	264.078	M-H	88096	gamma-Glutamyl-S-methylcysteine	Endogenous;Food;Plant
263.1031	264.136	M-H	89094	Curcolonol	Endogenous;Food
263.1031	264.136	M-H	89458	4-Hydroxydehydromyoporone	Endogenous;Food
263.1031	264.136	M-H	90160	Isoamberboin	Endogenous;Food;Plant;TCM Ingredients
263.1031	264.136	M-H	45378	(+)-Abscisic Acid	Agricultural Chemicals;Endogenous;Food;Plant;TCM Ingredients
263.1031	264.136	M-H	64112	(-)-Abscisic acid	Agricultural Chemicals;Endogenous;Food;Plant;TCM Ingredients
263.1031	264.136	M-H	53364	(S)-(+)-Abscisic acid	Agricultural Chemicals;Endogenous;Food;Plant;TCM Ingredients
263.1031	264.136	M-H	90973	Tanacetin	Endogenous;Food;Plant;TCM Ingredients
263.1031	264.136	M-H	91221	15-Hydroxymarasmen-3-one	Endogenous;Food;Plant;TCM Ingredients
263.1031	264.136	M-H	91259	Abscisic acid	Endogenous;Food;TCM Ingredients
263.1031	264.136	M-H	91282	(1beta,8beta)-1,8-Dihydroxy-3,7(11)-eudesmadien-12,8-olide	Endogenous;Food
263.1031	264.136	M-H	67837	Vulgarin	Endogenous;Food;Plant;TCM Ingredients
263.1031	264.136	M-H	91291	3-Epiarmefolin	Endogenous;Food
263.1031	264.136	M-H	91350	Alkhanin	Endogenous;Food;Plant;TCM Ingredients
263.1031	264.136	M-H	91793	Tavulin	Endogenous;Food;Plant
263.1031	264.136	M-H	91920	Tatridin B	Endogenous;Food;Plant;TCM Ingredients
263.1031	264.136	M-H	92033	Istanbulin A	Endogenous;Food;Plant;TCM Ingredients
263.1031	264.136	M-H	92394	Blennin B	Endogenous;Food;Plant;TCM Ingredients
263.1031	264.121	M-H	95608	Ilicifolinoside A	Endogenous;Food
263.1031	264.121	M-H	95609	(Z)-2-Methyl-2-butene-1,4-diol 4-O-beta-D-Glucopyranoside	Endogenous;Food
263.1031	264.136	M-H	95646	(8betaOH,10beta)-8-Hydroxy-3-oxo-7(11)-eremophilen-12,8-olide	Endogenous;Food;TCM Ingredients
263.1031	264.136	M-H	89094	Curcolonol	Endogenous;Food
263.1031	264.136	M-H	89458	4-Hydroxydehydromyoporone	Endogenous;Food
263.1031	264.136	M-H	45378	(+)-Abscisic Acid	Agricultural Chemicals;Endogenous;Food;Plant;TCM Ingredients
263.1031	264.136	M-H	53364	(S)-(+)-Abscisic acid	Endogenous;Food;Plant
263.1031	264.136	M-H	90973	Tanacetin	Endogenous;Food;Plant;TCM Ingredients
263.1031	264.136	M-H	91221	15-Hydroxymarasmen-3-one	Endogenous;Food;Plant;TCM Ingredients
263.1031	264.136	M-H	91291	3-Epiarmefolin	Endogenous;Food
263.1031	264.136	M-H	91350	Alkhanin	Endogenous;Food;Plant;TCM Ingredients
263.1031	264.136	M-H	91793	Tavulin	Endogenous;Food;Plant
263.1031	264.136	M-H	92033	Istanbulin A	Endogenous;Food;Plant;TCM Ingredients
263.1031	264.121	M-H	95608	Ilicifolinoside A	Endogenous;Food
263.1031	264.121	M-H	95609	(Z)-2-Methyl-2-butene-1,4-diol 4-O-beta-D-Glucopyranoside	Endogenous;Food
263.1031	264.136	M-H	95646	(8betaOH,10beta)-8-Hydroxy-3-oxo-7(11)-eremophilen-12,8-olide	Endogenous;Food;TCM Ingredients
263.1031	264.136	M-H	64112	(-)-Abscisic acid	Agricultural Chemicals;Endogenous;Food;Plant;TCM Ingredients
263.1031	264.136	M-H	67837	Vulgarin	Endogenous;Food;Plant;TCM Ingredients
NEG	710.243	5.35	0.075213	0.36849	0.80326	-0.31605	0.12272	0.43017	0.83915	-0.253	0.042596	0.15473	0.79838	-0.32485	0.0064833	0.042388	0.62658	-0.67444	0.146	0.32962	0.78004	-0.35839	0.070666	0.23217	0.74668	-0.42144	0.087566	0.26726	0.78481	-0.34959
QueryMZ	MetlinMass	Adducts	MID	Common_name	Annotation
NEG	211.093	2.62	0.075373	0.36849	0.62359	-0.68133	0.040726	0.256	0.53972	-0.88973	0.0034062	0.030403	0.37164	-1.428	0.031881	0.12125	0.45862	-1.1246	0.25914	0.48093	0.73544	-0.44331	0.5908	0.783	0.84974	-0.23491	0.68338	0.85014	1.234	0.3034
QueryMZ	MetlinMass	Adducts	MID	Common_name	Annotation
211.0932	212.068	M-H	5868	Vanillactic acid	Endogenous;Food
211.0932	212.116	M-H	62027	L-prolyl-L-proline	Endogenous;Food
211.0932	212.091	M-H	85754	Glycyl-Histidine	Endogenous
211.0932	212.091	M-H	85791	Histidinyl-Glycine	Endogenous
211.0932	212.141	M-H	86234	Cucurbic acid	Endogenous;Food;Plant;TCM Ingredients
211.0932	212.106	M-H	72974	MeIQ	Carcinogenic Potency;Endogenous;Food
211.0932	212.095	M-H	43924	Harmine	Drug;Endogenous;Food;Plant;TCM Ingredients
211.0932	212.068	M-H	68483	Danielone	Endogenous;Food;Plant;TCM Ingredients
211.0932	212.095	M-H	44541	DIPHENYLUREA	Agricultural Chemicals;Drug;Endogenous;Food;Plant
211.0932	212.141	M-H	44409	DIHYDROJASMONIC ACID	Endogenous;Food;Plant;TCM Ingredients
211.0932	212.09	M-H	44475	PERSEITOL	Endogenous;Food;Plant;TCM Ingredients
211.0932	212.141	M-H	90432	Vulgarole	Endogenous;Food;Plant;TCM Ingredients
211.0932	212.12	M-H	90991	11,12-Dihydrolactaroviolin	Endogenous;Food;Plant;TCM Ingredients
211.0932	212.12	M-H	91587	Pyrocurzerenone	Endogenous;Food;Plant;TCM Ingredients
211.0932	212.141	M-H	74731	Traumatin	Endogenous;Food
211.0932	212.12	M-H	95852	Deterrol	Endogenous;Food
211.0932	212.141	M-H	44409	DIHYDROJASMONIC ACID	Endogenous;Food;Plant;TCM Ingredients
211.0932	212.09	M-H	44475	PERSEITOL	Endogenous;Food;Plant;TCM Ingredients
211.0932	212.141	M-H	90432	Vulgarole	Endogenous;Food;Plant;TCM Ingredients
NEG	145.061	1.92	0.076108	0.36913	0.49821	-1.0052	0.21819	0.56084	1.5965	0.67488	0.16161	0.38107	1.5061	0.59077	0.06087	0.1927	0.42287	-1.2417	0.73224	0.8449	0.84878	-0.23655	0.0089747	0.074679	0.26488	-1.9166	0.0039507	0.04538	0.28078	-1.8325
QueryMZ	MetlinMass	Adducts	MID	Common_name	Annotation
145.0606	146.022	M-H	119	Oxoglutaric acid	Cosmetic;Endogenous;Food;Microbial Metabolites;Plant;TCM Ingredients
145.0606	146.058	M-H	5411	2-Methylglutaric acid	Endogenous;Food;Microbial Metabolites
145.0606	146.058	M-H	74933	2-methyl-glutaric acid	Endogenous;Food;Microbial Metabolites
145.0606	146.058	M-H	115	Adipic acid	Cosmetic;Drug Metabolite;Endogenous;Food;Microbial Metabolites;Plant;TCM Ingredients
145.0606	146.069	M-H	18	L-Glutamine	Cosmetic;Drug;Endogenous;Food;Microbial Metabolites;Plant;TCM Ingredients;Toxins/Pollutant
145.0606	146.058	M-H	3798	3-Methylglutaric acid	Endogenous;Food
145.0606	146.058	M-H	5821	Monomethyl glutaric acid	Endogenous;Food;TCM Ingredients
145.0606	146.069	M-H	304	B-ureidoisobutyric acid	Endogenous;Food;Microbial Metabolites;Plant
145.0606	146.058	M-H	6473	2,2-Dimethyl Succinic acid	Endogenous;Food
145.0606	146.094	M-H	6547	3-Hydroxyisoheptanoic acid	Endogenous;Food
145.0606	146.069	M-H	63630	D-Glutamine	Endogenous;Food;Microbial Metabolites;TCM Ingredients
145.0606	146.084	M-H	4161	5,6-Dimethylbenzimidazole	Endogenous;Food;Microbial Metabolites
145.0606	146.069	M-H	58589	Ala-Gly	Endogenous;Food
145.0606	146.069	M-H	85603	Alanyl-Glycine	Endogenous;Food
145.0606	146.058	M-H	58590	(S)-2-Aceto-2-hydroxybutanoic acid	Endogenous;Food;Microbial Metabolites
145.0606	146.106	M-H	62789	(3S)-3,6-Diaminohexanoate	Endogenous;Food
145.0606	146.106	M-H	62790	(3S,5S)-3,5-Diaminohexanoate	Endogenous;Food
145.0606	146.022	M-H	85255	3-oxoglutaric acid	Endogenous
145.0606	146.073	M-H	86368	4-Phenyl-2-butenal	Endogenous;Food;TCM Ingredients
145.0606	146.073	M-H	86394	3-(4-Methylphenyl)-2-propenal	Endogenous;Food
145.0606	146.084	M-H	86458	1H-Indole-3-methanamine	Endogenous;Food;Plant;TCM Ingredients
145.0606	146.084	M-H	68164	Myosmine	Endogenous;Food;Plant;TCM Ingredients
145.0606	146.084	M-H	87274	1,4-Dimethylpyrrolo[1,2-a]pyrazine	Endogenous;Food
145.0606	146.084	M-H	87275	3,4-Dimethylpyrrolo[1,2-a]pyrazine	Endogenous;Food
145.0606	146.084	M-H	87276	1,3-Dimethylpyrrolo[1,2-a]pyrazine	Endogenous;Food
145.0606	146.073	M-H	87771	2-Methyl-3-phenyl-2-propenal	Cosmetic;Endogenous;Food;Plant
145.0606	146.073	M-H	87812	Benzylideneacetone	Cosmetic;Endogenous;Food;TCM Ingredients;Toxins/Pollutant
145.0606	146.113	M-H	87841	Dibutyl sulfide	Cosmetic;Endogenous;Food;Plant;TCM Ingredients
145.0606	146.094	M-H	88315	(+/-)-Ethyl 2-hydroxy-2-methylbutyrate	Endogenous;Food
145.0606	146.058	M-H	89561	Dimethyl succinate	Cosmetic;Endogenous;Food;Microbial Metabolites;TCM Ingredients
145.0606	146.073	M-H	91119	4-(1-Methylethenyl)benzaldehyde	Endogenous;Food;Plant;TCM Ingredients
145.0606	146.094	M-H	91377	Methyl DL-Leucate	Endogenous;Food
145.0606	146.077	M-H	94037	S-Methyl hexanethioate	Endogenous;Food
145.0606	146.077	M-H	94040	S-Methyl 4-methylpentanethioate	Endogenous;Food
145.0606	146.058	M-H	5411	2-Methylglutaric acid	Endogenous;Food;Microbial Metabolites
145.0606	146.106	M-H	71200	2,6-diaminohexanoic acid	Endogenous
145.0606	146.106	M-H	71200	Lysine	Endogenous
145.0606	146.106	M-H	6919	D-Lysine	Drug;Endogenous;Food;Plant
145.0606	146.069	M-H	58589	Ala-Gly	Endogenous;Food
NEG	703.321	5.5	0.076802	0.37092	0.84312	-0.24618	0.084744	0.35397	0.8137	-0.29743	0.017243	0.085213	0.76324	-0.38979	0.00065436	0.0084877	0.3371	-1.5688	0.0012317	0.017398	0.39982	-1.3226	0.0028079	0.038496	0.41428	-1.2713	0.0028971	0.036214	0.44167	-1.179
QueryMZ	MetlinMass	Adducts	MID	Common_name	Annotation
703.3213	704.341	M-H	91482	25-Acetyl-6,7-didehydrofevicordin F 3-glucoside	Endogenous;Food
703.3213	704.341	M-H	91482	25-Acetyl-6,7-didehydrofevicordin F 3-glucoside	Endogenous;Food
NEG	537.416	6.91	0.077842	0.37387	0.765	-0.38648	5.9646e-05	0.014485	3.3515	1.7448	0.25587	0.50028	2.3488	1.2319	0.00085744	0.010193	2.2794	1.1886	0.00022626	0.0047486	2.9796	1.5751	0.14376	0.35597	0.6801	-0.55617	0.57266	0.80126	0.97046	-0.043256
QueryMZ	MetlinMass	Adducts	MID	Common_name	Annotation
537.4158	538.454	M-H	3591	Neurosporene	Endogenous;Food;Plant;TCM Ingredients
537.4158	538.46	M-H	58647	DG(14:0/16:1(9Z)/0:0)	Endogenous;Food;Microbial Metabolites
537.4158	538.46	M-H	58675	DG(14:1(9Z)/16:0/0:0)	Endogenous;Food
537.4158	538.46	M-H	58731	DG(16:0/14:1(9Z)/0:0)	Endogenous;Food
537.4158	538.46	M-H	58740	DG(16:1(9Z)/14:0/0:0)	Endogenous;Food;Microbial Metabolites
537.4158	538.454	M-H	90894	beta-Zeacarotene	Endogenous;Food;Plant;TCM Ingredients
537.4158	538.454	M-H	93694	(9Z,7'Z,9'Z)-7,8-Dihydrolycopene	Endogenous;Food;Plant;TCM Ingredients
537.4158	538.46	M-H	58731	DG(16:0/14:1(9Z)/0:0)	Endogenous;Food
537.4158	538.454	M-H	90894	beta-Zeacarotene	Endogenous;Food;Plant;TCM Ingredients
NEG	677.307	5.32	0.078571	0.3751	0.90025	-0.15161	0.33717	0.69855	0.96691	-0.04854	0.27371	0.52106	0.95598	-0.064952	0.0038065	0.031261	0.62427	-0.67976	0.018848	0.090445	0.69344	-0.52815	0.0047764	0.052543	0.64563	-0.63122	0.0062995	0.058842	0.65302	-0.6148
QueryMZ	MetlinMass	Adducts	MID	Common_name	Annotation
677.3069	678.362	M-H	89381	1-Acetyl-3,14,20-trihydroxywitha-5,24-dienolide 3-glucoside	Endogenous;Food
677.3069	678.362	M-H	90143	Medicagenic acid 3-O-b-D-glucuronide	Endogenous;Food
677.3069	678.362	M-H	89381	1-Acetyl-3,14,20-trihydroxywitha-5,24-dienolide 3-glucoside	Endogenous;Food
677.3069	678.362	M-H	90143	Medicagenic acid 3-O-b-D-glucuronide	Endogenous;Food
NEG	1003.67	5.95	0.07877	0.3751	1.3212	0.40182	0.023609	0.21225	0.68	-0.55639	0.00049874	0.0089344	0.53965	-0.88989	0.0071513	0.044398	0.34325	-1.5427	0.0030326	0.033261	0.25981	-1.9445	0.036395	0.15239	0.50478	-0.98628	0.073082	0.2353	0.63605	-0.65278
QueryMZ	MetlinMass	Adducts	MID	Common_name	Annotation
NEG	676.304	5.32	0.081023	0.38237	0.87208	-0.19747	0.4321	0.75689	0.94783	-0.077292	0.16435	0.38431	0.91836	-0.12287	0.0080036	0.046279	0.61075	-0.71135	0.030754	0.12257	0.70034	-0.51388	0.010276	0.080768	0.64436	-0.63406	0.011666	0.082634	0.66504	-0.58848
QueryMZ	MetlinMass	Adducts	MID	Common_name	Annotation
NEG	608.847	0.33	0.081329	0.38237	1.0905	0.12495	0.90902	0.97639	0.99319	-0.0098618	0.15522	0.37334	1.0981	0.13507	0.00031431	0.0048138	0.68486	-0.54612	1.1537e-05	0.00063269	0.62804	-0.67107	0.00029348	0.013566	0.68956	-0.53626	0.0001311	0.0058651	0.62365	-0.68119
QueryMZ	MetlinMass	Adducts	MID	Common_name	Annotation
NEG	753.019	0.35	0.082113	0.38237	1.1891	0.24984	0.07812	0.33817	0.80742	-0.30862	0.67695	0.84025	0.95104	-0.072417	0.014427	0.06832	0.63508	-0.65498	0.00096576	0.014402	0.5341	-0.90482	0.10676	0.30401	0.78656	-0.34637	0.013049	0.088031	0.66777	-0.58257
QueryMZ	MetlinMass	Adducts	MID	Common_name	Annotation
NEG	160.842	0.58	0.082323	0.38237	1.2806	0.35677	0.025904	0.21481	1.3736	0.45798	0.0053629	0.039673	1.4904	0.57568	0.5506	0.72158	1.119	0.1622	0.36213	0.56844	0.87383	-0.19457	0.16462	0.38844	0.81463	-0.29579	0.050195	0.18156	0.75081	-0.41349
QueryMZ	MetlinMass	Adducts	MID	Common_name	Annotation
160.842	161.899	M-H	58177	Phosphoroselenoic acid	Endogenous;Food;Microbial Metabolites
160.842	161.896	M-H	62915	Tellurite	Cosmetic;Endogenous;Food
160.842	161.899	M-H	58177	Phosphoroselenoic acid	Endogenous;Food;Microbial Metabolites
NEG	942.211	0.36	0.083658	0.38752	0.78276	-0.35336	0.0007319	0.065823	0.58333	-0.77762	0.0018147	0.023075	0.59586	-0.74697	0.25138	0.461	0.81817	-0.28953	0.84986	0.91383	1.0452	0.063836	0.038044	0.1566	1.4026	0.48809	0.068171	0.22329	1.3731	0.45744
QueryMZ	MetlinMass	Adducts	MID	Common_name	Annotation
NEG	512.298	4.8	0.084962	0.39142	0.69826	-0.51816	0.42445	0.75131	0.86016	-0.21732	0.025217	0.11079	0.57758	-0.79191	0.00011808	0.0023073	0.14466	-2.7892	0.00048248	0.0082022	0.20717	-2.2711	0.00052647	0.019043	0.16818	-2.5719	0.0022354	0.032234	0.25046	-1.9973
QueryMZ	MetlinMass	Adducts	MID	Common_name	Annotation
512.2982	513.276	M-H	6725	Sulfolithocholylglycine	Endogenous;Food;Microbial Metabolites
NEG	208.85	0.33	0.085399	0.39188	1.2285	0.29688	0.0052223	0.11544	1.4839	0.56944	0.002202	0.025334	1.5317	0.61515	0.17233	0.37296	0.76458	-0.38726	0.010803	0.067738	0.62237	-0.68415	0.0018223	0.031983	0.51523	-0.9567	0.0009872	0.019752	0.49916	-1.0024
QueryMZ	MetlinMass	Adducts	MID	Common_name	Annotation
NEG	333.256	10.63	0.085712	0.39188	0.7354	-0.4434	0.00037912	0.046036	0.47647	-1.0695	0.0019212	0.023543	0.5223	-0.93704	2.4513e-05	0.00088665	0.16062	-2.6383	2.0712e-05	0.0009266	0.21841	-2.1949	0.00010433	0.010433	0.3371	-1.5687	0.00014531	0.0061755	0.30752	-1.7012
QueryMZ	MetlinMass	Adducts	MID	Common_name	Annotation
333.256	334.251	M-H	5840	Tetrahydrodeoxycorticosterone	Endogenous;Food;TCM Ingredients
333.256	334.251	M-H	57989	Tetrahydrodeoxycorticosterone	Endogenous;Food;TCM Ingredients
333.256	334.214	M-H	3823	13,14-dihydro-15-keto-PGA2	Endogenous;Food
333.256	334.214	M-H	3464	PGJ2	Endogenous;Food;TCM Ingredients
333.256	334.214	M-H	75178	8-epi-15-J2t-IsoP	Endogenous;Food;TCM Ingredients
333.256	334.214	M-H	3465	PGA2	Endogenous;Food;TCM Ingredients
333.256	334.287	M-H	195	Docosatrienoic Acid	Endogenous;Food
333.256	334.287	M-H	35070	13,16,19-docosatrienoic acid	Endogenous;Food
333.256	334.214	M-H	36254	12-oxo-LTB4	Endogenous;Food
333.256	334.214	M-H	3466	PGB2	Endogenous;Food;TCM Ingredients
333.256	334.214	M-H	3815	delta-12-PGJ2	Endogenous;Food
333.256	334.214	M-H	36241	LTB5	Endogenous;Food
333.256	334.241	M-H	62871	Emopamil	Drug;Endogenous;Food
333.256	334.251	M-H	86363	Lycopersiconol	Endogenous;Food;TCM Ingredients
333.256	334.287	M-H	87407	(all-Z)-7,10,13-Docosatrienoic acid	Endogenous;Food
333.256	334.214	M-H	90592	Crispanone	Endogenous;Food;Plant;TCM Ingredients
333.256	334.214	M-H	91084	8alpha-8-Hydroxy-12-oxo-13-abieten-18-oic acid	Endogenous;Food
333.256	334.251	M-H	91447	ent-16beta-Methoxy-19-kauranoic acid	Endogenous;Food;TCM Ingredients
333.256	334.214	M-H	91786	(ent-16betaOH)-16,17-Dihydroxy-9(11)-kauren-19-oic acid	Endogenous;Food;TCM Ingredients
333.256	334.214	M-H	64035	6&beta;,7&beta;-Dihydroxykaurenoic acid	Endogenous;Food;TCM Ingredients
333.256	334.214	M-H	91841	Dehydropinifolic acid	Endogenous;Food;Plant;TCM Ingredients
333.256	334.214	M-H	95488	Phytocassane B	Endogenous;Food;Plant;TCM Ingredients
333.256	334.214	M-H	3824	bicyclo-PGE2	Endogenous;Food
333.256	334.214	M-H	3467	PGC2	Endogenous;Food
333.256	334.214	M-H	36122	15-deoxy-PGD2	Endogenous;Food
333.256	334.214	M-H	36122	15-deoxy-&delta;-12,14-PGD2	Endogenous;Food
333.256	334.251	M-H	5840	Tetrahydrodeoxycorticosterone	Endogenous;Food
333.256	334.251	M-H	57989	Tetrahydrodeoxycorticosterone	Endogenous;Food
333.256	334.214	M-H	3464	PGJ2	Endogenous;Food;TCM Ingredients
333.256	334.214	M-H	75178	8-epi-15-J2t-IsoP	Endogenous;Food;TCM Ingredients
333.256	334.287	M-H	195	Docosatrienoic Acid	Endogenous;Food
333.256	334.214	M-H	64035	6&beta;,7&beta;-Dihydroxykaurenoic acid	Endogenous;Food;TCM Ingredients
333.256	334.214	M-H	95488	Phytocassane B	Endogenous;Food;Plant;TCM Ingredients
333.256	334.214	M-H	3466	PGB2	Endogenous;Food;TCM Ingredients
333.256	334.287	M-H	35070	13,16,19-docosatrienoic acid	Endogenous;Food
NEG	243.919	0.27	0.088974	0.40335	1.1216	0.1655	0.056938	0.28883	1.1582	0.21193	3.4459e-05	0.0022531	1.2945	0.37236	0.029536	0.11436	1.1267	0.17209	0.91918	0.95558	1.0046	0.0065916	0.80792	0.91503	0.97276	-0.039846	0.036376	0.15083	0.87039	-0.20027
QueryMZ	MetlinMass	Adducts	MID	Common_name	Annotation
NEG	788.578	9.11	0.093466	0.41814	0.77124	-0.37475	0.028821	0.22789	0.62693	-0.67363	0.42287	0.66318	0.88304	-0.17945	0.00017935	0.0032173	0.33727	-1.568	0.0003719	0.0067259	0.43731	-1.1933	0.034656	0.14803	0.53797	-0.8944	0.000859	0.018722	0.38194	-1.3886
QueryMZ	MetlinMass	Adducts	MID	Common_name	Annotation
788.5778	789.625	M-H	59336	PC(14:0/22:0)	Endogenous;Food;Microbial Metabolites
788.5778	789.625	M-H	39358	PC(16:0/20:0)[U]	Endogenous;Food;Microbial Metabolites
788.5778	789.625	M-H	59426	PC(16:0/20:0)	Endogenous;Food;Microbial Metabolites
788.5778	789.625	M-H	59484	PC(18:0/18:0)	Cosmetic;Endogenous;Food;Microbial Metabolites
788.5778	789.625	M-H	59711	PC(20:0/16:0)	Endogenous;Food;Microbial Metabolites
788.5778	789.567	M-H	59969	PC(20:5(5Z,8Z,11Z,14Z,17Z)/P-18:1(11Z))	Endogenous;Food;Microbial Metabolites
788.5778	789.567	M-H	59970	PC(20:5(5Z,8Z,11Z,14Z,17Z)/P-18:1(9Z))	Endogenous;Food;Microbial Metabolites
788.5778	789.625	M-H	59971	PC(22:0/14:0)	Endogenous;Food;Microbial Metabolites
788.5778	789.567	M-H	60197	PC(22:6(4Z,7Z,10Z,13Z,16Z,19Z)/P-16:0)	Endogenous;Food;Microbial Metabolites
788.5778	789.625	M-H	60357	PE(15:0/24:0)	Endogenous;Food;Microbial Metabolites
788.5778	789.625	M-H	61102	PE(24:0/15:0)	Endogenous;Food;Microbial Metabolites
788.5778	789.552	M-H	3888	PS(18:0/18:1(9Z))	Endogenous;Food;Microbial Metabolites
788.5778	789.552	M-H	40797	PS(18:0/18:1(9Z))[U]	Endogenous;Food;Microbial Metabolites
788.5778	789.567	M-H	62059	PC(P-16:0/22:6(4Z,7Z,10Z,13Z,16Z,19Z))	Endogenous;Food
788.5778	789.567	M-H	62108	PC(P-18:1(11Z)/20:5(5Z,8Z,11Z,14Z,17Z))	Endogenous;Food
788.5778	789.567	M-H	62137	PC(P-18:1(9Z)/20:5(5Z,8Z,11Z,14Z,17Z))	Endogenous;Food
788.5778	789.552	M-H	40804	PS(18:1(9Z)/18:0)[U]	Endogenous;Food;Microbial Metabolites
788.5778	789.552	M-H	40819	PS(18:1(9Z)/18:0)	Endogenous;Food;Microbial Metabolites
788.5778	789.552	M-H	77798	PS(14:1(9Z)/22:0)	Endogenous;Food
788.5778	789.552	M-H	78631	PS(16:0/20:1(11Z))	Endogenous;Food
788.5778	789.552	M-H	77880	PS(16:1(9Z)/20:0)	Endogenous;Food
788.5778	789.552	M-H	78178	PS(20:0/16:1(9Z))	Endogenous;Food
788.5778	789.552	M-H	78198	PS(20:1(11Z)/16:0)	Endogenous;Food
788.5778	789.552	M-H	78366	PS(22:0/14:1(9Z))	Endogenous;Food
788.5778	789.625	M-H	39358	PC(16:0/20:0)[U]	Endogenous;Food;Microbial Metabolites
788.5778	789.552	M-H	3888	PS(18:0/18:1(9Z))	Endogenous;Food;Microbial Metabolites
788.5778	789.552	M-H	40797	PS(18:0/18:1(9Z))[U]	Endogenous;Food;Microbial Metabolites
788.5778	789.552	M-H	40804	PS(18:1(9Z)/18:0)[U]	Endogenous;Food
NEG	416.985	0.35	0.094478	0.42155	1.1131	0.15464	0.025008	0.21278	1.1735	0.23077	0.018195	0.087874	1.204	0.26786	0.036842	0.13413	0.77819	-0.3618	0.0015212	0.019591	0.69909	-0.51644	0.00076664	0.02139	0.66316	-0.59257	0.00081793	0.018611	0.64633	-0.62966
QueryMZ	MetlinMass	Adducts	MID	Common_name	Annotation
NEG	738.731	0.32	0.097664	0.43045	1.133	0.18011	0.36902	0.71688	0.92663	-0.10994	0.20845	0.4463	0.89851	-0.15439	0.00065046	0.0084877	0.62628	-0.67512	2.7558e-05	0.0010647	0.55278	-0.85523	0.0020533	0.03456	0.67587	-0.56518	0.0023563	0.032624	0.69702	-0.52073
QueryMZ	MetlinMass	Adducts	MID	Common_name	Annotation
NEG	731.038	0.36	0.098865	0.43206	1.147	0.19788	0.093315	0.36978	0.82977	-0.26922	0.38096	0.62791	0.89602	-0.15839	0.0080721	0.046304	0.67071	-0.57625	1.1145e-05	0.00063155	0.58474	-0.77412	0.032733	0.14159	0.80831	-0.30702	0.090005	0.27274	0.74854	-0.41786
QueryMZ	MetlinMass	Adducts	MID	Common_name	Annotation
NEG	266.804	0.33	0.099736	0.43253	1.3273	0.4085	0.0033266	0.09299	1.8707	0.9036	0.0029208	0.029109	1.9477	0.96176	0.28134	0.49105	0.75069	-0.41371	0.032624	0.12588	0.56557	-0.82221	0.004591	0.051011	0.40128	-1.3173	0.004279	0.047235	0.38543	-1.3755
QueryMZ	MetlinMass	Adducts	MID	Common_name	Annotation
NEG	92.9284	0.32	0.10124	0.43573	1.1554	0.20833	0.007277	0.12371	1.2848	0.36156	0.0033416	0.030403	1.3157	0.39579	0.12399	0.30111	0.78494	-0.34935	0.015767	0.0835	0.67939	-0.55769	0.0038378	0.045946	0.61093	-0.71091	0.0026198	0.034276	0.59661	-0.74514
QueryMZ	MetlinMass	Adducts	MID	Common_name	Annotation
92.9284	93.9822	M-H	66523	Chloroacetic acid	Carcinogenic Potency;Cosmetic;Endogenous;Food
92.9284	93.9418	M-H	72253	Methyl bromide	Agricultural Chemicals;Carcinogenic Potency;Cosmetic;Endogenous;Food;Toxins/Pollutant
NEG	507.327	5.5	0.10361	0.43841	0.82543	-0.27678	0.042034	0.25797	0.66026	-0.5989	6.8402e-05	0.0026949	0.52466	-0.93053	1.8708e-05	0.00070676	0.15278	-2.7105	6.2989e-05	0.0020204	0.18509	-2.4337	0.001645	0.031983	0.2314	-2.1116	0.00034549	0.011071	0.2912	-1.7799
QueryMZ	MetlinMass	Adducts	MID	Common_name	Annotation
507.3275	508.371	M-H	90486	2'-Apo-beta-carotenal	Endogenous;Food
507.3275	508.376	M-H	91069	Fasciculol C	Endogenous;Food;Plant;TCM Ingredients
NEG	557.321	5.49	0.10478	0.43841	0.82075	-0.28499	0.027728	0.22366	0.72283	-0.46828	0.0024779	0.027242	0.63753	-0.64944	0.00028886	0.0044643	0.24565	-2.0253	0.0005184	0.0085851	0.2993	-1.7403	0.0015697	0.03103	0.33985	-1.557	0.0021375	0.032234	0.38532	-1.3759
QueryMZ	MetlinMass	Adducts	MID	Common_name	Annotation
557.3211	558.319	M-H	41667	Cucurbitacin B	Endogenous;Food;Plant;TCM Ingredients
557.3211	558.283	M-H	92015	Glycinoeclepin B	Endogenous;Food;TCM Ingredients
557.3211	558.283	M-H	92015	Glycinoeclepin B	Endogenous;Food;TCM Ingredients
557.3211	558.319	M-H	41667	Cucurbitacin B	Endogenous;Food;Plant;TCM Ingredients
NEG	116.016	0.31	0.10498	0.43841	0.8329	-0.26379	0.43956	0.76329	0.91644	-0.12589	0.83777	0.92706	1.012	0.017278	0.086461	0.24538	1.2303	0.29904	0.00084053	0.012758	1.4772	0.56283	0.0021519	0.035517	1.3425	0.42493	0.048001	0.17654	1.2157	0.28176
QueryMZ	MetlinMass	Adducts	MID	Common_name	Annotation
116.0164	117.054	M-H	9	Guanidineacetic acid	Drug;Endogenous;Food;Toxins/Pollutant
116.0164	117.043	M-H	4230	Aceturic acid	Drug;Endogenous;Food;TCM Ingredients
116.0164	117.058	M-H	286	Indole	Agricultural Chemicals;Carcinogenic Potency;Cosmetic;Endogenous;Food;Microbial Metabolites;Plant;TCM Ingredients
116.0164	117.025	M-H	6594	Homocysteine thiolactone	Endogenous;Food
116.0164	117.043	M-H	35855	2S-amino-3-oxo-butanoic acid	Drug;Endogenous;Food;Microbial Metabolites
116.0164	117.043	M-H	3244	L-Aspartic acid b-semialdehyde	Endogenous;Food;Microbial Metabolites;Plant;TCM Ingredients
NEG	332.912	0.29	0.10522	0.43841	0.8079	-0.30775	0.18497	0.52631	0.84423	-0.24429	0.41212	0.65538	0.89837	-0.15462	0.0033568	0.028843	0.54102	-0.88625	0.0086652	0.062883	0.66966	-0.5785	0.0037391	0.045576	0.64084	-0.64197	0.0016813	0.027973	0.60222	-0.73164
QueryMZ	MetlinMass	Adducts	MID	Common_name	Annotation
NEG	240.921	0.29	0.10983	0.45098	0.91382	-0.13001	0.23458	0.5885	1.0704	0.098085	0.085236	0.2494	1.0893	0.12342	0.14566	0.33105	0.90549	-0.14322	0.8607	0.92141	0.99088	-0.013211	0.021961	0.11078	0.84598	-0.24131	0.0041109	0.046282	0.83125	-0.26664
QueryMZ	MetlinMass	Adducts	MID	Common_name	Annotation
NEG	610.322	5.33	0.11063	0.4522	0.86629	-0.20708	0.0060799	0.11801	0.82407	-0.27916	0.0070796	0.045645	0.81154	-0.30127	0.0020466	0.019769	0.49915	-1.0025	0.011572	0.070259	0.57619	-0.79537	0.0087642	0.074125	0.60571	-0.7233	0.0114	0.081775	0.61507	-0.70119
QueryMZ	MetlinMass	Adducts	MID	Common_name	Annotation
NEG	1005.68	5.95	0.11065	0.4522	1.3502	0.43317	0.13656	0.4579	0.71969	-0.47455	0.04017	0.14976	0.64476	-0.63317	0.0039714	0.03215	0.37009	-1.4341	0.00029708	0.0057931	0.2741	-1.8672	0.018165	0.098975	0.51423	-0.95951	0.018849	0.10936	0.57399	-0.80089
QueryMZ	MetlinMass	Adducts	MID	Common_name	Annotation
NEG	558.314	5.49	0.11376	0.45863	0.76917	-0.37862	0.04308	0.26069	0.66277	-0.59341	0.014304	0.075283	0.56476	-0.82429	0.00024259	0.0039999	0.18689	-2.4197	0.00029172	0.0057665	0.24297	-2.0411	0.0015376	0.030752	0.28198	-1.8263	0.0058182	0.05652	0.33092	-1.5955
QueryMZ	MetlinMass	Adducts	MID	Common_name	Annotation
NEG	584.258	7.06	0.11902	0.47157	1.5205	0.60456	0.091458	0.36931	1.8013	0.84903	0.073651	0.22398	1.6374	0.71138	0.028688	0.11263	2.598	1.3774	0.0057611	0.052219	1.7086	0.77282	0.098241	0.28745	1.4423	0.52835	0.0022426	0.032234	1.5867	0.666
QueryMZ	MetlinMass	Adducts	MID	Common_name	Annotation
NEG	527.352	5.52	0.12012	0.47379	0.75876	-0.39829	0.001288	0.068423	0.43544	-1.1995	0.0027479	0.028485	0.57844	-0.78977	0.0040471	0.032371	0.28576	-1.8071	0.0093228	0.06487	0.37662	-1.4088	0.1198	0.32174	0.65626	-0.60765	0.022167	0.11703	0.49403	-1.0173
QueryMZ	MetlinMass	Adducts	MID	Common_name	Annotation
527.3522	528.381	M-H	88074	Tsugaric acid B	Endogenous;Food
527.3522	528.345	M-H	88971	Ganoderic acid V	Endogenous;Food;Plant;TCM Ingredients
527.3522	528.345	M-H	90540	(22S)-Acetoxy-3alpha,15alpha-dihydroxylanosta-7,9(11),24-trien-26-oic acid	Endogenous;Food;Plant
527.3522	528.345	M-H	90635	(24E)-3alpha-Acetoxy-15alpha,22S-dihydroxylanosta-7,9(11),24-trien-26-oic acid	Endogenous;Food
527.3522	528.381	M-H	88074	Tsugaric acid B	Endogenous;Food
527.3522	528.345	M-H	88971	Ganoderic acid V	Endogenous;Food;Plant;TCM Ingredients
527.3522	528.345	M-H	90540	(22S)-Acetoxy-3alpha,15alpha-dihydroxylanosta-7,9(11),24-trien-26-oic acid	Endogenous;Food;Plant
527.3522	528.345	M-H	90635	(24E)-3alpha-Acetoxy-15alpha,22S-dihydroxylanosta-7,9(11),24-trien-26-oic acid	Endogenous;Food
NEG	898.578	9.39	0.12397	0.4856	0.85965	-0.21818	0.18525	0.52631	0.87236	-0.19701	0.003031	0.029277	0.78745	-0.34475	0.04648	0.15931	0.72184	-0.47024	0.30934	0.52379	0.83969	-0.25206	0.31449	0.56099	0.82746	-0.27324	0.43295	0.6996	0.91669	-0.1255
QueryMZ	MetlinMass	Adducts	MID	Common_name	Annotation
NEG	532.894	0.33	0.12621	0.49165	1.1442	0.19428	0.0045271	0.10543	1.3567	0.44015	0.0069423	0.045532	1.369	0.45308	0.27568	0.48767	0.85187	-0.23129	0.033777	0.12833	0.74454	-0.42557	0.0044633	0.05048	0.62788	-0.67144	0.0060629	0.057261	0.62228	-0.68437
QueryMZ	MetlinMass	Adducts	MID	Common_name	Annotation
NEG	552.316	5.14	0.12638	0.49165	0.79523	-0.33055	0.041123	0.256	0.67691	-0.56296	0.0027327	0.028485	0.5897	-0.76195	0.024536	0.10223	0.43469	-1.202	0.049129	0.16217	0.54662	-0.8714	0.12638	0.3331	0.64216	-0.63899	0.16568	0.39782	0.73714	-0.44
QueryMZ	MetlinMass	Adducts	MID	Common_name	Annotation
552.3164	553.317	M-H	62287	LysoPE(0:0/24:6(6Z,9Z,12Z,15Z,18Z,21Z))	Endogenous;Food
552.3164	553.317	M-H	62313	LysoPE(24:6(6Z,9Z,12Z,15Z,18Z,21Z)/0:0)	Endogenous;Food
NEG	638.276	5.5	0.12787	0.49516	0.86411	-0.21071	0.092684	0.36975	0.73847	-0.4374	0.00023547	0.0055596	0.58462	-0.77444	4.6221e-05	0.0013096	0.16825	-2.5714	8.5791e-05	0.0023995	0.1947	-2.3607	0.0014627	0.029603	0.22783	-2.134	0.00056168	0.014042	0.28779	-1.7969
QueryMZ	MetlinMass	Adducts	MID	Common_name	Annotation
NEG	482.315	5.34	0.13092	0.49904	0.90556	-0.14312	0.052247	0.27647	0.83638	-0.25777	0.00052084	0.0091282	0.72416	-0.46562	0.0046489	0.034721	0.4183	-1.2574	0.0076711	0.059287	0.46193	-1.1143	0.01522	0.094059	0.50014	-0.9996	0.028407	0.13158	0.57764	-0.79176
QueryMZ	MetlinMass	Adducts	MID	Common_name	Annotation
482.3149	483.302	M-H	5690	Lithocholic acid taurine conjugate	Endogenous;Food
482.3149	483.302	M-H	5690	Lithocholic acid taurine conjugate	Endogenous;Food
NEG	268.801	0.33	0.13239	0.50236	1.3158	0.39591	0.0051466	0.11544	1.8366	0.87707	0.0048908	0.037965	1.9442	0.95917	0.32742	0.53727	0.76397	-0.38842	0.041153	0.14278	0.58062	-0.78433	0.0051314	0.053975	0.41596	-1.2655	0.0051443	0.051812	0.39295	-1.3476
QueryMZ	MetlinMass	Adducts	MID	Common_name	Annotation
NEG	1061.68	5.37	0.13389	0.50584	0.79427	-0.3323	0.060368	0.29406	0.63324	-0.65916	7.9898e-05	0.0026949	0.3976	-1.3306	5.8757e-05	0.0014909	0.121	-3.0469	0.00013973	0.0033933	0.15235	-2.7146	0.0025039	0.036934	0.19109	-2.3877	0.0021139	0.032234	0.30434	-1.7162
QueryMZ	MetlinMass	Adducts	MID	Common_name	Annotation
NEG	715.065	0.35	0.13414	0.50584	1.1562	0.20939	0.10426	0.39213	1.1986	0.26137	0.13449	0.34126	1.1837	0.24334	0.063986	0.19741	0.71457	-0.48486	0.0013142	0.018018	0.61803	-0.69424	0.0018682	0.032408	0.59616	-0.74623	0.0025937	0.034276	0.60366	-0.7282
QueryMZ	MetlinMass	Adducts	MID	Common_name	Annotation
NEG	572.345	5.93	0.13594	0.50708	0.83173	-0.26582	0.67277	0.87497	0.96437	-0.052339	0.018867	0.090349	0.7793	-0.35974	0.0070081	0.044028	0.67455	-0.568	0.20671	0.41965	0.81102	-0.30218	0.13241	0.34181	0.69947	-0.51566	0.14709	0.36961	0.86558	-0.20826
QueryMZ	MetlinMass	Adducts	MID	Common_name	Annotation
NEG	165.054	2.3	0.13746	0.50708	1.0581	0.081419	0.011474	0.15199	0.54581	-0.87353	0.0045269	0.036822	0.65332	-0.61414	5.0683e-05	0.0013451	0.37274	-1.4238	0.80679	0.88544	0.35228	-1.5052	0.307	0.55461	0.6829	-0.55024	0.0048676	0.050189	0.57053	-0.80963
QueryMZ	MetlinMass	Adducts	MID	Common_name	Annotation
165.0539	166.048	M-H	45854	L-Arabinonic acid	Endogenous;Food
165.0539	166.063	M-H	5547	D-Phenyllactic acid	Drug;Endogenous;Microbial Metabolites
165.0539	166.063	M-H	3291	L-(-)-3-Phenyllactic acid	Endogenous;Microbial Metabolites;Plant;TCM Ingredients
165.0539	166.063	M-H	5745	L-3-Phenyllactic acid	Endogenous;Microbial Metabolites;Plant;TCM Ingredients
165.0539	166.063	M-H	63106	D-(+)-3-Phenyllactic acid	Endogenous;Microbial Metabolites;Plant;TCM Ingredients
165.0539	166.063	M-H	34529	Phenyllactic acid	Drug;Endogenous;Microbial Metabolites;Plant
165.0539	166.099	M-H	91994	5-Hydroxy-p-mentha-6,8-dien-2-one	Endogenous;Food
165.0539	166.048	M-H	3290	Ribonic acid	Cosmetic;Endogenous;Food
165.0539	166.049	M-H	2820	3-Methylxanthine	Drug Metabolite;Endogenous;Food;Plant;TCM Ingredients
165.0539	166.049	M-H	58075	7-Methylxanthine	Drug;Drug Metabolite;Endogenous;Food;Plant;TCM Ingredients
165.0539	166.063	M-H	64948	4-Methoxyphenylacetic acid	Endogenous;Food;TCM Ingredients
165.0539	166.063	M-H	4148	Phloretic acid	Drug;Drug Metabolite;Endogenous;Food;Microbial Metabolites;Plant;TCM Ingredients
165.0539	166.063	M-H	6540	3-(4-Hydroxyphenyl)propionic acid	Drug;Drug Metabolite;Endogenous;Food;Microbial Metabolites;Plant;TCM Ingredients
165.0539	166.027	M-H	6628	Benzoquinoneacetic acid	Endogenous;Food
165.0539	166.027	M-H	6676	Terephthalic acid	Endogenous;Food;Plant;TCM Ingredients
165.0539	166.099	M-H	41133	Perillic acid	Endogenous;Food;Plant
165.0539	166.063	M-H	58294	Homovanillin	Endogenous;Food
165.0539	166.049	M-H	44228	1-METHYLXANTHINE	Drug Metabolite;Endogenous;Food
165.0539	166.063	M-H	86409	Ethyl vanillin	Cosmetic;Endogenous;Food;Microbial Metabolites;TCM Ingredients
165.0539	166.099	M-H	86428	Wine lactone	Endogenous;Food;TCM Ingredients
165.0539	166.111	M-H	86460	3-Isopropyl-2-methoxy-5-methylpyrazine	Endogenous;Food;Plant
165.0539	166.063	M-H	86522	Ethyl salicylate	Cosmetic;Endogenous;Food;Plant;TCM Ingredients
165.0539	166.097	M-H	69834	Cyromazine	Agricultural Chemicals;Endogenous;Food;Toxins/Pollutant
165.0539	166.099	M-H	87397	6-Pentyl-2H-pyran-2-one	Endogenous;Food;Plant;TCM Ingredients
165.0539	166.063	M-H	1221	3,4-Dihydroxyphenylacetone	Drug Metabolite;Endogenous;Food
165.0539	166.111	M-H	87979	2-Methoxy-3-(2-methylpropyl)pyrazine	Cosmetic;Drug;Endogenous;Food;Microbial Metabolites;Plant;TCM Ingredients
165.0539	166.063	M-H	88132	Guaicyl acetate	Cosmetic;Endogenous;Food;TCM Ingredients
165.0539	166.099	M-H	88153	2-tert-Butyl-1,4-benzenediol	Carcinogenic Potency;Cosmetic;Drug;Endogenous;Food;TCM Ingredients;Toxins/Pollutant
165.0539	166.099	M-H	88216	2-Methoxy-4-propylphenol	Cosmetic;Endogenous;Food;TCM Ingredients;Toxins/Pollutant
165.0539	166.063	M-H	44710	3,4-Dimethoxy-benzaldehyde	Cosmetic;Endogenous;Food;Plant;TCM Ingredients
165.0539	166.063	M-H	88534	Ethylparaben	Agricultural Chemicals;Cosmetic;Endogenous;Food;Microbial Metabolites;Plant;TCM Ingredients;Toxins/Pollutant
165.0539	166.063	M-H	88560	Methyl 2-methoxybenzoate	Cosmetic;Endogenous;Food;Plant;TCM Ingredients
165.0539	166.027	M-H	88565	3,4-Methylenedioxybenzoic acid	Endogenous;Food;Plant;TCM Ingredients
165.0539	166.099	M-H	88567	1,1-Dimethoxy-2-phenylethane	Cosmetic;Endogenous;Food
165.0539	166.063	M-H	88582	Methyl 4-methoxybenzoate	Cosmetic;Endogenous;Food;Plant;TCM Ingredients
165.0539	166.099	M-H	90308	alpha-Teresantalic acid	Endogenous;Food;Plant;TCM Ingredients
165.0539	166.099	M-H	90416	Epinepetalactone	Endogenous;Food;Plant;TCM Ingredients
165.0539	166.099	M-H	90547	2,4,7-Decatrienoic acid	Endogenous;Food
165.0539	166.099	M-H	91253	Isomintlactone	Endogenous;Food;Plant;TCM Ingredients
165.0539	166.099	M-H	91878	1,4-Epidioxy-p-mentha-2,8-diene	Endogenous;Food;Plant;TCM Ingredients
165.0539	166.099	M-H	91879	1,2:3,4-Diepoxy-p-menth-8-ene	Endogenous;Food;Plant;TCM Ingredients
165.0539	166.099	M-H	91994	5-Hydroxy-p-mentha-6,8-dien-2-one	Endogenous;Food
165.0539	166.099	M-H	91995	2-Hydroxy-p-mentha-1,8-dien-6-one	Endogenous;Food
165.0539	166.099	M-H	93958	(1xi,4xi,6xi)-Carvone oxide	Cosmetic;Endogenous;Food;Plant;TCM Ingredients
165.0539	166.099	M-H	95964	3-Hydroxy-p-mentha-1,8-dien-7-al	Endogenous;Food
165.0539	166.063	M-H	95984	Ethyl 2-furanacrylate	Endogenous;Food
165.0539	166.048	M-H	45854	L-Arabinonic acid	Endogenous;Food
165.0539	166.063	M-H	3291	L-(-)-3-Phenyllactic acid	Endogenous;Microbial Metabolites;Plant;TCM Ingredients
165.0539	166.063	M-H	5745	L-3-Phenyllactic acid	Endogenous;Microbial Metabolites;Plant;TCM Ingredients
165.0539	166.063	M-H	64162	4-[(1E)-3-hydroxyprop-1-en-1-yl]benzene-1,2-diol	Endogenous
165.0539	166.063	M-H	64162	Caffeyl alcohol	Endogenous
165.0539	166.063	M-H	5462	2-hydroxy-2-phenylpropanoic acid	Endogenous
165.0539	166.063	M-H	5462	Atrolactic acid	Endogenous
165.0539	166.063	M-H	4148	Phloretic acid	Drug;Drug Metabolite;Endogenous;Food;Microbial Metabolites;Plant;TCM Ingredients
165.0539	166.099	M-H	91878	1,4-Epidioxy-p-mentha-2,8-diene	Endogenous;Food;Plant;TCM Ingredients
165.0539	166.099	M-H	91879	1,2:3,4-Diepoxy-p-menth-8-ene	Endogenous;Food;Plant;TCM Ingredients
165.0539	166.099	M-H	95964	3-Hydroxy-p-mentha-1,8-dien-7-al	Endogenous;Food
NEG	478.292	4.98	0.13751	0.50708	0.70605	-0.50215	0.27559	0.63655	0.76221	-0.39174	0.0014522	0.01975	0.43838	-1.1897	6.9523e-05	0.0016273	0.14083	-2.828	0.00010802	0.0028694	0.19946	-2.3258	0.00029461	0.013566	0.18476	-2.4362	0.00033287	0.011071	0.32125	-1.6382
QueryMZ	MetlinMass	Adducts	MID	Common_name	Annotation
478.2922	479.338	M-H	40402	PC(P-16:0/0:0)	Endogenous;Food;Microbial Metabolites
478.2922	479.338	M-H	61716	LysoPC(P-16:0)	Endogenous;Food;Microbial Metabolites
478.2922	479.301	M-H	62263	LysoPE(0:0/18:1(11Z))	Endogenous;Food
478.2922	479.301	M-H	62264	LysoPE(0:0/18:1(9Z))	Endogenous;Food
478.2922	479.301	M-H	62291	LysoPE(18:1(11Z)/0:0)	Endogenous;Food
478.2922	479.301	M-H	40778	PE(18:1(9Z)/0:0)	Endogenous;Food;Microbial Metabolites
478.2922	479.267	M-H	93240	PC-M5'	Endogenous;Food;TCM Ingredients
478.2922	479.338	M-H	40402	PC(P-16:0/0:0)	Endogenous;Food;Microbial Metabolites
478.2922	479.267	M-H	93240	PC-M5'	Endogenous;Food;TCM Ingredients
NEG	546.282	5.48	0.1381	0.50816	1.3022	0.38093	0.27145	0.62946	0.83516	-0.25988	0.058958	0.19128	0.65815	-0.60352	0.00019769	0.0033946	0.31081	-1.6859	5.142e-05	0.001681	0.23868	-2.0668	0.00016534	0.010922	0.37216	-1.426	0.032434	0.13959	0.47225	-1.0824
QueryMZ	MetlinMass	Adducts	MID	Common_name	Annotation
NEG	583.255	7.06	0.13903	0.50834	1.6003	0.67837	0.18975	0.53318	1.5443	0.62693	0.18576	0.41883	1.3831	0.46793	0.042097	0.14756	2.8567	1.5144	0.012327	0.072965	1.7851	0.836	0.026548	0.12433	1.8499	0.88744	0.000236	0.0085361	2.0654	1.0464
QueryMZ	MetlinMass	Adducts	MID	Common_name	Annotation
583.2555	584.263	M-H	81	Bilirubin	Endogenous;Food;TCM Ingredients;Toxins/Pollutant
583.2555	584.263	M-H	5475	4E,15Z-Bilirubin IXa	Endogenous;Food
583.2555	584.283	M-H	87688	Glycosides	Drug;Endogenous;Food;Plant
NEG	608.317	5.33	0.13905	0.50834	0.93379	-0.098824	0.1214	0.42732	0.91743	-0.12433	0.00072921	0.011465	0.83317	-0.26333	0.0080736	0.046304	0.52061	-0.94173	0.012732	0.074127	0.55752	-0.84291	0.015671	0.094179	0.56746	-0.8174	0.027512	0.13064	0.62486	-0.67841
QueryMZ	MetlinMass	Adducts	MID	Common_name	Annotation
NEG	516.866	0.31	0.14075	0.51109	0.8043	-0.31419	0.4515	0.77375	1.0732	0.10189	0.037336	0.14263	1.2538	0.32627	0.062899	0.19551	0.74401	-0.42661	0.6387	0.78899	0.92503	-0.11243	0.0025374	0.036934	0.69327	-0.52851	5.8004e-05	0.003144	0.59342	-0.75288
QueryMZ	MetlinMass	Adducts	MID	Common_name	Annotation
NEG	94.9252	0.32	0.141	0.51109	1.1349	0.18257	0.0095044	0.13949	1.2785	0.35445	0.005239	0.039673	1.3386	0.42074	0.11713	0.28941	0.78606	-0.34729	0.010302	0.066677	0.69262	-0.52986	0.0017645	0.031983	0.61483	-0.70173	0.001392	0.025445	0.58722	-0.76803
QueryMZ	MetlinMass	Adducts	MID	Common_name	Annotation
NEG	662.808	0.32	0.1418	0.51201	1.1227	0.16692	0.14425	0.47391	1.1123	0.15352	0.0027111	0.028485	1.2589	0.33212	0.63937	0.78697	0.96436	-0.052354	0.24424	0.46662	0.859	-0.21928	0.25303	0.49815	0.86701	-0.20587	0.063363	0.21131	0.76606	-0.38447
QueryMZ	MetlinMass	Adducts	MID	Common_name	Annotation
NEG	634.305	5.12	0.14848	0.52942	1.1454	0.19591	0.47427	0.78749	0.92237	-0.11658	0.089415	0.2572	0.84101	-0.2498	4.5302e-06	0.00023337	0.32662	-1.6143	3.1692e-07	9.6407e-05	0.28514	-1.8102	1.7502e-05	0.0059506	0.35411	-1.4977	1.3285e-06	0.00016132	0.38836	-1.3645
QueryMZ	MetlinMass	Adducts	MID	Common_name	Annotation
NEG	283.079	2.34	0.14855	0.52942	0.63136	-0.66347	0.0054702	0.11624	0.27757	-1.8491	0.75035	0.88276	1.1515	0.20356	0.0057572	0.038838	0.22101	-2.1778	0.091079	0.253	0.35006	-1.5143	0.61878	0.80592	0.79623	-0.32875	0.097263	0.28335	0.19193	-2.3814
QueryMZ	MetlinMass	Adducts	MID	Common_name	Annotation
283.0795	284.076	M-H	3408	Xanthosine	Endogenous;Food;Microbial Metabolites;Plant;TCM Ingredients
283.0795	284.09	M-H	62424	p-Cresol glucuronide	Endogenous;Food
283.0795	284.083	M-H	85701	Cysteinyl-Tyrosine	Endogenous
283.0795	284.083	M-H	85994	Tyrosyl-Cysteine	Endogenous
283.0795	284.068	M-H	50070	Galangin 3-methyl ether	Endogenous;Food;Plant;TCM Ingredients
283.0795	284.105	M-H	52681	Desmethoxymatteucinol	Endogenous;Food;Plant
283.0795	284.068	M-H	87186	2-(6-Hydroxy-2-methoxy-3,4-methylenedioxyphenyl)benzofuran	Endogenous;Food;Microbial Metabolites;Plant
283.0795	284.068	M-H	48483	Farnisin	Endogenous;Food;Plant
283.0795	284.068	M-H	47600	Xenognosin B	Endogenous;Food;Plant;TCM Ingredients
283.0795	284.08	M-H	1855	5-(3,4-Dihydroxyphenyl)-5-phenylhydantoin	Drug Metabolite;Endogenous
283.0795	284.068	M-H	49521	5,7-dihydroxy-6-methoxy-2-phenyl-4H-chromen-4-one	Endogenous;TCM Ingredients
283.0795	284.068	M-H	49521	Oroxylin A	Endogenous;TCM Ingredients
283.0795	284.068	M-H	47577	7-hydroxy-3-(4-hydroxy-3-methoxyphenyl)-4H-chromen-4-one	Endogenous;TCM Ingredients
283.0795	284.068	M-H	47577	3'-Methoxydaidzein	Endogenous;TCM Ingredients
283.0795	284.068	M-H	49384	7-hydroxy-2-(4-hydroxyphenyl)-5-methoxy-4H-chromen-4-one	Endogenous
283.0795	284.068	M-H	49384	Thevetiaflavone	Endogenous
283.0795	284.068	M-H	47618	6,7-dihydroxy-3-(4-methoxyphenyl)-4H-chromen-4-one	Endogenous;Plant
283.0795	284.068	M-H	47618	Texasin	Endogenous;Plant
283.0795	284.105	M-H	52580	7,8-dimethoxy-2-phenyl-3,4-dihydro-2H-1-benzopyran-4-one	Endogenous
283.0795	284.105	M-H	52580	7,8-Dimethoxyflavanone	Endogenous
283.0795	284.068	M-H	49522	5,6-dihydroxy-7-methoxy-2-phenyl-4H-chromen-4-one	Endogenous;TCM Ingredients
283.0795	284.068	M-H	49522	Negletein	Endogenous;TCM Ingredients
283.0795	284.068	M-H	47649	7,8-dihydroxy-3-(4-methoxyphenyl)-4H-chromen-4-one	Endogenous;TCM Ingredients
283.0795	284.068	M-H	47649	Retusin(Dalbergia)	Endogenous;TCM Ingredients
NEG	526.349	5.52	0.15044	0.5306	0.81296	-0.29874	0.0033367	0.09299	0.50526	-0.9849	0.0053143	0.039673	0.67257	-0.57224	0.0072376	0.04449	0.28859	-1.7929	0.01338	0.075832	0.35498	-1.4942	0.072385	0.23484	0.57116	-0.80802	0.020628	0.11433	0.42908	-1.2207
QueryMZ	MetlinMass	Adducts	MID	Common_name	Annotation
526.3493	527.361	M-H	86863	Daphniphylline	Endogenous;Food;Plant;TCM Ingredients
NEG	132.018	0.34	0.15516	0.54498	0.87009	-0.20077	0.12491	0.43515	0.82591	-0.27595	0.23287	0.47926	0.89031	-0.16761	0.015152	0.071101	1.926	0.9456	0.0040779	0.04054	2.2136	1.1464	0.0053717	0.055345	2.332	1.2215	0.0048713	0.050189	2.1633	1.1132
QueryMZ	MetlinMass	Adducts	MID	Common_name	Annotation
132.0184	133.038	M-H	15	L-Aspartic Acid	Cosmetic;Drug;Endogenous;Food;Microbial Metabolites;Plant;TCM Ingredients
132.0184	133.053	M-H	7014	Indoxyl	Endogenous;Food;TCM Ingredients
132.0184	133.038	M-H	63097	D-Aspartic acid	Drug;Endogenous;Food;TCM Ingredients
132.0184	133.053	M-H	34513	4-Hydroxybenzyl cyanide	Endogenous;Food;Plant;TCM Ingredients
132.0184	133.074	M-H	87840	L-2-Amino-5-hydroxypentanoic acid	Endogenous;Food;Plant
132.0184	133.074	M-H	88391	N-Lactoyl ethanolamine	Cosmetic;Endogenous;Food
132.0184	133.053	M-H	88414	2-Methyl-4,5-benzoxazole	Cosmetic;Endogenous;Food;TCM Ingredients
NEG	702.319	5.5	0.15619	0.54635	0.84727	-0.23911	0.072716	0.32446	0.78502	-0.3492	0.0074217	0.046557	0.71054	-0.49301	9.884e-05	0.0020519	0.23661	-2.0794	0.00019922	0.0044562	0.27926	-1.8403	0.00048347	0.017867	0.3014	-1.7302	0.00041871	0.011915	0.33299	-1.5864
QueryMZ	MetlinMass	Adducts	MID	Common_name	Annotation
NEG	215.05	0.36	0.15818	0.55102	0.94186	-0.086409	0.050956	0.27327	0.89722	-0.15646	0.19031	0.42513	0.94853	-0.076242	0.0052869	0.036835	1.4596	0.54561	0.0020854	0.025112	1.5497	0.63202	0.0016792	0.031983	1.6268	0.70207	0.0021435	0.032234	1.5388	0.62185
QueryMZ	MetlinMass	Adducts	MID	Common_name	Annotation
215.0498	216.057	M-H	7083	Bisnorbiotin	Endogenous;Food
215.0498	216.079	M-H	87115	Artemidinol	Endogenous;Food;TCM Ingredients
215.0498	216.079	M-H	88137	6-(3,4-Methylenedioxyphenyl)-3,5-hexadien-2-one	Endogenous;Food;Plant;TCM Ingredients
215.0498	216.079	M-H	88597	(Z)-6-(2-Methoxyvinyl)-7-methyl-2H-1-benzopyran-2-one	Endogenous;Food
NEG	816.536	8.5	0.1599	0.55171	0.86282	-0.21287	0.72158	0.89999	0.98348	-0.024033	0.18798	0.42215	0.82474	-0.27799	5.2533e-06	0.00024807	0.4381	-1.1907	0.0011852	0.017075	0.50776	-0.97778	0.0025257	0.036934	0.44546	-1.1666	0.043625	0.16893	0.5312	-0.91266
QueryMZ	MetlinMass	Adducts	MID	Common_name	Annotation
816.5358	817.562	M-H	60672	PE(20:1(11Z)/22:6(4Z,7Z,10Z,13Z,16Z,19Z))	Endogenous;Food;Microbial Metabolites
816.5358	817.562	M-H	60703	PE(20:2(11Z,14Z)/22:5(4Z,7Z,10Z,13Z,16Z))	Endogenous;Food;Microbial Metabolites
816.5358	817.562	M-H	60704	PE(20:2(11Z,14Z)/22:5(7Z,10Z,13Z,16Z,19Z))	Endogenous;Food;Microbial Metabolites
816.5358	817.562	M-H	60735	PE(20:3(5Z,8Z,11Z)/22:4(7Z,10Z,13Z,16Z))	Endogenous;Food;Microbial Metabolites
816.5358	817.562	M-H	60768	PE(20:3(8Z,11Z,14Z)/22:4(7Z,10Z,13Z,16Z))	Endogenous;Food;Microbial Metabolites
816.5358	817.562	M-H	60866	PE(20:5(5Z,8Z,11Z,14Z,17Z)/22:2(13Z,16Z))	Endogenous;Food;Microbial Metabolites
816.5358	817.562	M-H	60955	PE(22:2(13Z,16Z)/20:5(5Z,8Z,11Z,14Z,17Z))	Endogenous;Food;Microbial Metabolites
816.5358	817.562	M-H	60984	PE(22:4(7Z,10Z,13Z,16Z)/20:3(5Z,8Z,11Z))	Endogenous;Food;Microbial Metabolites
816.5358	817.562	M-H	60997	PE(22:4(7Z,10Z,13Z,16Z)/20:3(8Z,11Z,14Z))	Endogenous;Food;Microbial Metabolites
816.5358	817.562	M-H	61016	PE(22:5(4Z,7Z,10Z,13Z,16Z)/20:2(11Z,14Z))	Endogenous;Food;Microbial Metabolites
816.5358	817.562	M-H	61049	PE(22:5(7Z,10Z,13Z,16Z,19Z)/20:2(11Z,14Z))	Endogenous;Food;Microbial Metabolites
816.5358	817.562	M-H	61081	PE(22:6(4Z,7Z,10Z,13Z,16Z,19Z)/20:1(11Z))	Endogenous;Food;Microbial Metabolites
816.5358	817.583	M-H	77886	PS(16:1(9Z)/22:0)	Endogenous;Food
816.5358	817.583	M-H	78625	PS(18:0/20:1(11Z))	Endogenous;Food
816.5358	817.583	M-H	78621	PS(18:1(9Z)/20:0)	Endogenous;Food
816.5358	817.583	M-H	78615	PS(20:0/18:1(9Z))	Endogenous;Food
816.5358	817.583	M-H	78203	PS(20:1(11Z)/18:0)	Endogenous;Food
816.5358	817.583	M-H	78370	PS(22:0/16:1(9Z))	Endogenous;Food
NEG	212.844	0.32	0.16102	0.55299	1.2142	0.28002	0.011308	0.15199	1.4588	0.54474	0.0061586	0.042216	1.5977	0.67601	0.20604	0.41453	0.74064	-0.43316	0.02102	0.096577	0.60997	-0.71318	0.0030376	0.040081	0.50772	-0.9779	0.0023989	0.032624	0.46356	-1.1092
QueryMZ	MetlinMass	Adducts	MID	Common_name	Annotation
NEG	336.05	0.36	0.16197	0.55432	1.0639	0.089313	0.87557	0.96746	1.0131	0.018828	0.96879	0.98704	0.99915	-0.0012264	0.01044	0.056274	0.85639	-0.22366	0.0031045	0.033832	0.80498	-0.31298	0.045651	0.17513	0.84528	-0.24249	0.017647	0.106	0.85712	-0.22244
QueryMZ	MetlinMass	Adducts	MID	Common_name	Annotation
336.05	337.094	M-H	7068	S-(Hydroxymethyl)glutathione	Endogenous;Food;Microbial Metabolites
336.05	337.08	M-H	62403	2,8-Dihydroxyquinoline-beta-D-glucuronide	Endogenous;Food
336.05	337.054	M-H	85313	2-Oxoclopidogrel	Drug Metabolite;Endogenous
NEG	172.096	2.34	0.16575	0.56337	0.65518	-0.61004	0.21504	0.55734	0.71174	-0.49057	0.005486	0.039805	0.40469	-1.3051	0.26786	0.47682	0.7101	-0.4939	0.77339	0.86749	1.0838	0.11614	0.88432	0.95178	0.9977	-0.0033246	0.12537	0.33249	1.7547	0.81121
QueryMZ	MetlinMass	Adducts	MID	Common_name	Annotation
172.0956	173.105	M-H	5669	Hexanoylglycine	Endogenous;Food
172.0956	173.105	M-H	5715	Isovalerylalanine	Endogenous;Food
172.0956	173.105	M-H	6480	Isovalerylsarcosine	Endogenous;Food
172.0956	173.08	M-H	7030	2-Oxoarginine	Endogenous;Food;Toxins/Pollutant
172.0956	173.069	M-H	3298	N-Acetyl-L-glutamate 5-semialdehyde	Endogenous;Food;Microbial Metabolites;Plant
172.0956	173.105	M-H	43866	N-Acetylleucine	Endogenous;Food
NEG	279.613	3.63	0.16694	0.56419	1.382	0.46678	0.17768	0.5155	2.2686	1.1818	0.0029452	0.029109	2.0426	1.0304	0.00060502	0.0080111	4.9074	2.295	0.0037095	0.038054	3.5509	1.8282	0.070224	0.23217	2.1632	1.1132	0.020812	0.11433	2.4025	1.2645
QueryMZ	MetlinMass	Adducts	MID	Common_name	Annotation
NEG	548.868	0.31	0.16751	0.56419	1.0811	0.11246	0.52876	0.815	0.96729	-0.047983	0.56235	0.77097	1.0306	0.043418	0.0066914	0.042765	0.72025	-0.47343	0.0033633	0.035513	0.66624	-0.58589	0.020507	0.1076	0.74461	-0.42544	0.005693	0.055622	0.6989	-0.51685
QueryMZ	MetlinMass	Adducts	MID	Common_name	Annotation
NEG	740.522	10.09	0.16835	0.5656	0.77244	-0.37251	0.26503	0.62059	0.81441	-0.29617	0.0064727	0.04339	0.53568	-0.90056	0.0039592	0.03215	0.3602	-1.4731	0.026887	0.11207	0.46632	-1.1006	0.0449	0.17348	0.44228	-1.177	0.14807	0.37016	0.67242	-0.57257
QueryMZ	MetlinMass	Adducts	MID	Common_name	Annotation
740.5221	741.531	M-H	59391	PC(15:0/18:3(6Z,9Z,12Z))	Endogenous;Food;Microbial Metabolites
740.5221	741.531	M-H	59392	PC(15:0/18:3(9Z,12Z,15Z))	Endogenous;Food;Microbial Metabolites
740.5221	741.567	M-H	59477	PC(16:1(9Z)/P-18:1(11Z))	Endogenous;Food;Microbial Metabolites
740.5221	741.567	M-H	59478	PC(16:1(9Z)/P-18:1(9Z))	Endogenous;Food;Microbial Metabolites
740.5221	741.567	M-H	59605	PC(18:2(9Z,12Z)/P-16:0)	Endogenous;Food;Microbial Metabolites
740.5221	741.531	M-H	59611	PC(18:3(6Z,9Z,12Z)/15:0)	Endogenous;Food;Microbial Metabolites
740.5221	741.531	M-H	59644	PC(18:3(9Z,12Z,15Z)/15:0)	Endogenous;Food;Microbial Metabolites
740.5221	741.531	M-H	60320	PE(14:1(9Z)/22:2(13Z,16Z))	Endogenous;Food;Microbial Metabolites
740.5221	741.531	M-H	60370	PE(16:0/20:3(5Z,8Z,11Z))	Endogenous;Food;Microbial Metabolites
740.5221	741.531	M-H	60371	PE(16:0/20:3(8Z,11Z,14Z))	Endogenous;Food;Microbial Metabolites
740.5221	741.531	M-H	60396	PE(16:1(9Z)/20:2(11Z,14Z))	Endogenous;Food;Microbial Metabolites
740.5221	741.531	M-H	60421	PE(18:0/18:3(6Z,9Z,12Z))	Endogenous;Food;Microbial Metabolites
740.5221	741.531	M-H	60422	PE(18:0/18:3(9Z,12Z,15Z))	Endogenous;Food;Microbial Metabolites
740.5221	741.531	M-H	60445	PE(18:1(11Z)/18:2(9Z,12Z))	Endogenous;Food;Microbial Metabolites
740.5221	741.531	M-H	40447	PE(18:1(9Z)/18:2(9Z,12Z))	Endogenous;Food;Microbial Metabolites
740.5221	741.531	M-H	60499	PE(18:2(9Z,12Z)/18:1(11Z))	Endogenous;Food;Microbial Metabolites
740.5221	741.531	M-H	60500	PE(18:2(9Z,12Z)/18:1(9Z))	Endogenous;Food;Microbial Metabolites
740.5221	741.531	M-H	60530	PE(18:3(6Z,9Z,12Z)/18:0)	Endogenous;Food;Microbial Metabolites
740.5221	741.531	M-H	60562	PE(18:3(9Z,12Z,15Z)/18:0)	Endogenous;Food;Microbial Metabolites
740.5221	741.531	M-H	60683	PE(20:2(11Z,14Z)/16:1(9Z))	Endogenous;Food;Microbial Metabolites
740.5221	741.531	M-H	60715	PE(20:3(5Z,8Z,11Z)/16:0)	Endogenous;Food;Microbial Metabolites
740.5221	741.531	M-H	60748	PE(20:3(8Z,11Z,14Z)/16:0)	Endogenous;Food;Microbial Metabolites
740.5221	741.531	M-H	60937	PE(22:2(13Z,16Z)/14:1(9Z))	Endogenous;Food;Microbial Metabolites
740.5221	741.567	M-H	62041	PC(P-16:0/18:2(9Z,12Z))	Endogenous;Food;Microbial Metabolites
740.5221	741.567	M-H	62093	PC(P-18:1(11Z)/16:1(9Z))	Endogenous;Food;Microbial Metabolites
740.5221	741.567	M-H	62122	PC(P-18:1(9Z)/16:1(9Z))	Endogenous;Food;Microbial Metabolites
740.5221	741.567	M-H	102742	PC(O-16:1(9Z)/18:2(9Z,12Z))	Endogenous;Food;Microbial Metabolites
NEG	479.296	5.47	0.17197	0.57081	1.3473	0.43006	0.24738	0.60249	0.83029	-0.26832	0.033855	0.1317	0.6734	-0.57046	0.00023471	0.0039506	0.27882	-1.8426	0.00026257	0.0053139	0.20695	-2.2727	0.0026526	0.037535	0.33581	-1.5743	0.005992	0.057113	0.41404	-1.2722
QueryMZ	MetlinMass	Adducts	MID	Common_name	Annotation
479.2963	480.309	M-H	43863	CRUSTECDYSONE	Endogenous;Food;Plant;TCM Ingredients
479.2963	480.309	M-H	57651	20-hydroxyecdysone	Endogenous;Food;Plant;TCM Ingredients
479.2963	480.257	M-H	88759	Citronellyl beta-sophoroside	Endogenous;Food
479.2963	480.345	M-H	57802	24-epi-brassinolide	Endogenous;Food;Plant;TCM Ingredients
479.2963	480.322	M-H	82351	1-heneicosanoyl-glycero-3-phosphate	Endogenous;Food
479.2963	480.322	M-H	82351	PA(21:0/0:0)	Endogenous;Food
479.2963	480.309	M-H	43863	CRUSTECDYSONE	Endogenous;Food;Plant;TCM Ingredients
479.2963	480.257	M-H	88759	Citronellyl beta-sophoroside	Endogenous;Food
NEG	210.851	0.32	0.17207	0.57081	1.1745	0.23211	0.010636	0.14769	1.3884	0.47339	0.0042899	0.03545	1.4923	0.57758	0.12676	0.30498	0.72958	-0.45487	0.0096411	0.06487	0.62116	-0.68697	0.0011203	0.027145	0.52549	-0.92825	0.00069862	0.017212	0.48888	-1.0324
QueryMZ	MetlinMass	Adducts	MID	Common_name	Annotation
NEG	725.876	12.03	0.17225	0.57081	0.90457	-0.1447	0.93926	0.98201	1.0015	0.0021054	0.60214	0.79414	1.0421	0.059558	0.6473	0.7894	1.028	0.039777	0.0013386	0.018205	1.1364	0.18448	0.59989	0.78994	1.0265	0.037671	0.92036	0.97952	0.98638	-0.019781
QueryMZ	MetlinMass	Adducts	MID	Common_name	Annotation
NEG	602.228	3.81	0.17605	0.58	1.3157	0.39585	0.13215	0.44932	1.5191	0.60324	0.0059834	0.041859	1.9672	0.97616	0.0075075	0.045136	2.0354	1.0253	0.024916	0.10833	1.547	0.62943	0.17184	0.39476	1.3398	0.42205	0.72026	0.87149	1.0346	0.049119
QueryMZ	MetlinMass	Adducts	MID	Common_name	Annotation
NEG	1064.81	12.03	0.18114	0.59105	0.9193	-0.1214	0.92906	0.98039	1.002	0.0029334	0.94841	0.97893	1.0054	0.007753	0.55486	0.72488	1.0348	0.049303	0.0047628	0.045235	1.1256	0.1707	0.45941	0.68899	1.0327	0.046369	0.61883	0.82576	1.0292	0.04155
QueryMZ	MetlinMass	Adducts	MID	Common_name	Annotation
NEG	633.32	5.13	0.18563	0.59979	0.88551	-0.17542	0.051447	0.27494	0.76501	-0.38645	0.00011663	0.0034784	0.65474	-0.61101	9.6103e-07	6.7953e-05	0.22054	-2.1809	4.7904e-06	0.00033312	0.24905	-2.0055	0.00012125	0.010616	0.28828	-1.7945	7.2988e-06	0.0006204	0.33683	-1.5699
QueryMZ	MetlinMass	Adducts	MID	Common_name	Annotation
633.3197	634.335	M-H	89382	(3b,20R,22R)-3,20,27-Trihydroxy-1-oxowitha-5,24-dienolide 3-glucoside	Endogenous;Food
633.3197	634.335	M-H	89382	(3b,20R,22R)-3,20,27-Trihydroxy-1-oxowitha-5,24-dienolide 3-glucoside	Endogenous;Food
NEG	477.281	5.11	0.1896	0.60815	1.3291	0.41049	0.18545	0.52631	0.75665	-0.40231	0.0089513	0.054661	0.55722	-0.84367	5.008e-05	0.0013451	0.18242	-2.4547	2.5394e-05	0.001004	0.13725	-2.8651	0.00043052	0.016634	0.24109	-2.0524	0.00051972	0.014024	0.32737	-1.611
QueryMZ	MetlinMass	Adducts	MID	Common_name	Annotation
477.2807	478.293	M-H	88013	Erinacine D	Endogenous;Food
477.2807	478.329	M-H	89706	Dolicholide	Endogenous;Food;Plant;TCM Ingredients
477.2807	478.329	M-H	93173	Polyporusterone A	Endogenous;Food;TCM Ingredients
477.2807	478.293	M-H	95770	25-Acetylvulgaroside	Endogenous;Food
477.2807	478.329	M-H	89706	Dolicholide	Endogenous;Food;Plant;TCM Ingredients
477.2807	478.293	M-H	95770	25-Acetylvulgaroside	Endogenous;Food
NEG	174.047	0.36	0.19093	0.61027	0.85337	-0.22876	0.40957	0.7423	0.90433	-0.14509	0.0027037	0.028485	0.68491	-0.54602	0.0028602	0.025657	0.54494	-0.87584	0.0052091	0.048657	0.63857	-0.64708	0.0022309	0.035994	0.60259	-0.73075	0.041299	0.16228	0.79564	-0.32982
QueryMZ	MetlinMass	Adducts	MID	Common_name	Annotation
174.0466	175.063	M-H	70	3-Indoleacetic Acid	Agricultural Chemicals;Carcinogenic Potency;Cosmetic;Drug;Drug Metabolite;Endogenous;Food;Microbial Metabolites;Plant;TCM Ingredients;Toxins/Pollutant
174.0466	175.048	M-H	3769	N-acetylaspartate	Endogenous;Food;Microbial Metabolites;Toxins/Pollutant
174.0466	175.096	M-H	16	Citrulline	Cosmetic;Drug;Endogenous;Food;Microbial Metabolites;Plant;TCM Ingredients;Toxins/Pollutant;
174.0466	175.084	M-H	6542	N-Carboxyethyl-&gamma;-aminobutyric acid	Cosmetic;Endogenous;Food
174.0466	175.096	M-H	58144	Argininic acid	Endogenous;Food;Toxins/Pollutant
174.0466	175.059	M-H	10	Guanidinosuccinic Acid	Endogenous;Food;Toxins/Pollutant
174.0466	175.048	M-H	63245	N-Formyl-L-glutamate	Endogenous;Food
174.0466	175.063	M-H	58202	5-Hydroxyindoleacetaldehyde	Drug Metabolite;Endogenous;Food;Plant
174.0466	175.013	M-H	87778	(R)-(E)-Sulforaphene	Endogenous;Food;Plant;TCM Ingredients
174.0466	175.049	M-H	87781	Berteroin	Endogenous;Food;TCM Ingredients
[truncated: 8,082 more rows]

## Sheet: Supp. Table 2
Supplementary Table 2. Paired statistical summary comparing day (d) 1, d 13, and d 25 samples to preterminal samples.
			SD1 vs. Pre				SD13 vs. Pre				SD25 vs. Pre				Preterminal vs. Pre				d 1 vs Preterminal				d 13 vs Preterminal				d 25 vs Preterminal
mode	mz	rt	p.value	FDR	FC	log2(FC)	p.value	FDR	FC	log2(FC)	p.value	FDR	FC	log2(FC)	p.value	FDR	FC	log2(FC)	p.value	FDR	FC	log2(FC)	p.value	FDR	FC	log2(FC)	p.value	FDR	FC	log2(FC)
NEG	112.016	0.38	0.0021645	0.051826	0.39714	-1.3323	0.0021645	0.073593	0.61101	-0.71073	0.0021645	0.025377	0.67741	-0.5619	0.7619	0.8687	0.8564	-0.22365	0.019048	0.10445	2.1564	1.1086	0.7619	0.88776	1.4016	0.48707	1	1	1.2642	0.33825
NEG	494.324	5.63	0.0021645	0.051826	0.46023	-1.1196	0.0021645	0.073593	0.58427	-0.7753	0.0021645	0.025377	0.43422	-1.2035	0.0095238	0.060188	0.17179	-2.5413	0.0095238	0.077098	0.37327	-1.4217	0.019048	0.11993	0.29403	-1.766	0.019048	0.12901	0.39564	-1.3378
NEG	554.345	5.63	0.0021645	0.051826	0.45887	-1.1238	0.0021645	0.073593	0.58417	-0.77555	0.0021645	0.025377	0.40852	-1.2915	0.0095238	0.060188	0.15303	-2.7081	0.019048	0.10445	0.3335	-1.5843	0.019048	0.11993	0.26196	-1.9326	0.038095	0.18772	0.3746	-1.4166
NEG	555.349	5.63	0.0021645	0.051826	0.43586	-1.1981	0.0021645	0.073593	0.58245	-0.7798	0.0021645	0.025377	0.40126	-1.3174	0.0095238	0.060188	0.16534	-2.5965	0.019048	0.10445	0.37933	-1.3985	0.019048	0.11993	0.28387	-1.8167	0.038095	0.18772	0.41205	-1.2791
NEG	622.332	5.63	0.0021645	0.051826	0.44712	-1.1613	0.0021645	0.073593	0.60667	-0.72103	0.0021645	0.025377	0.44278	-1.1753	0.0095238	0.060188	0.19694	-2.3442	0.019048	0.10445	0.44045	-1.1829	0.019048	0.11993	0.32462	-1.6232	0.066667	0.26984	0.44477	-1.1689
NEG	695.426	6.76	0.0021645	0.051826	0.55864	-0.84002	0.0021645	0.073593	0.3629	-1.4624	0.0021645	0.025377	0.2741	-1.8672	0.0095238	0.060188	0.029673	-5.0747	0.0095238	0.077098	0.053117	-4.2347	0.0095238	0.10513	0.081767	-3.6123	0.0095238	0.088959	0.10826	-3.2075
NEG	615.459	7.58	0.0021645	0.051826	0.50875	-0.97498	0.0021645	0.073593	3.8405	1.9413	0.93723	0.96622	2.8975	1.5348	0.0095238	0.060188	2.1107	1.0777	0.0095238	0.077098	4.1487	2.0527	0.066667	0.25241	0.54957	-0.86362	1	1	0.72845	-0.4571
NEG	544.317	5.64	0.0021645	0.051826	0.47664	-1.069	0.004329	0.082689	0.6579	-0.60405	0.0021645	0.025377	0.43917	-1.1872	0.0095238	0.060188	0.24753	-2.0143	0.11429	0.31236	0.51933	-0.94528	0.019048	0.11993	0.37625	-1.4103	0.11429	0.3578	0.56364	-0.82715
NEG	623.334	5.63	0.0021645	0.051826	0.49202	-1.0232	0.004329	0.082689	0.65312	-0.61458	0.0021645	0.025377	0.44361	-1.1726	0.0095238	0.060188	0.27203	-1.8782	0.066667	0.22266	0.55288	-0.85496	0.019048	0.11993	0.4165	-1.2636	0.25714	0.51611	0.61321	-0.70555
NEG	1093.73	5.96	0.0021645	0.051826	0.56601	-0.8211	0.004329	0.082689	0.63935	-0.64533	0.0021645	0.025377	0.4613	-1.1162	0.0095238	0.060188	0.20648	-2.2759	0.11429	0.31236	0.36479	-1.4548	0.038095	0.17695	0.32295	-1.6306	0.25714	0.51611	0.4476	-1.1597
NEG	1160.71	5.96	0.0021645	0.051826	0.69476	-0.52541	0.004329	0.082689	0.73099	-0.45208	0.0021645	0.025377	0.59938	-0.73847	0.0095238	0.060188	0.2764	-1.8552	0.066667	0.22266	0.39784	-1.3298	0.019048	0.11993	0.37812	-1.4031	0.25714	0.51611	0.46115	-1.1167
NEG	690.323	5.63	0.0021645	0.051826	0.53531	-0.90154	0.008658	0.1141	0.63872	-0.64675	0.0021645	0.025377	0.47758	-1.0662	0.0095238	0.060188	0.22211	-2.1707	0.038095	0.15643	0.41491	-1.2691	0.019048	0.11993	0.34774	-1.5239	0.11429	0.3578	0.46506	-1.1045
NEG	1091.73	5.96	0.0021645	0.051826	0.57542	-0.79731	0.008658	0.1141	0.64326	-0.63653	0.0021645	0.025377	0.47651	-1.0694	0.0095238	0.060188	0.18146	-2.4623	0.038095	0.15643	0.31535	-1.665	0.019048	0.11993	0.2821	-1.8257	0.11429	0.3578	0.38081	-1.3928
NEG	495.326	5.63	0.0021645	0.051826	0.51826	-0.94826	0.015152	0.14803	0.62731	-0.67276	0.0021645	0.025377	0.47584	-1.0714	0.0095238	0.060188	0.25846	-1.952	0.0095238	0.077098	0.49871	-1.0037	0.038095	0.17695	0.41202	-1.2792	0.0095238	0.088959	0.54317	-0.88054
NEG	638.354	5.96	0.0021645	0.051826	0.75328	-0.40875	0.015152	0.14803	0.78259	-0.35368	0.0021645	0.025377	0.70567	-0.50293	0.019048	0.093317	0.54006	-0.88881	0.35238	0.57325	0.71694	-0.48007	0.25714	0.49172	0.69009	-0.53513	0.47619	0.72996	0.76531	-0.38588
NEG	848.544	8.24	0.0021645	0.051826	0.47383	-1.0776	0.015152	0.14803	0.66354	-0.59174	0.0021645	0.025377	0.44144	-1.1797	0.0095238	0.060188	0.29089	-1.7815	0.038095	0.15643	0.61391	-0.7039	0.019048	0.11993	0.43839	-1.1897	0.019048	0.12901	0.65895	-0.60176
NEG	943.551	8.34	0.0021645	0.051826	0.47355	-1.0784	0.015152	0.14803	0.65241	-0.61615	0.0021645	0.025377	0.50971	-0.97225	0.0095238	0.060188	0.34826	-1.5218	0.17143	0.3965	0.73543	-0.44335	0.019048	0.11993	0.53381	-0.90561	0.11429	0.3578	0.68326	-0.5495
NEG	1092.73	5.96	0.0021645	0.051826	0.56178	-0.83193	0.015152	0.14803	0.63677	-0.65116	0.0021645	0.025377	0.48394	-1.0471	0.0095238	0.060188	0.18671	-2.4211	0.038095	0.15643	0.33236	-1.5892	0.019048	0.11993	0.29321	-1.77	0.066667	0.26984	0.38581	-1.374
NEG	1094.73	5.96	0.0021645	0.051826	0.65638	-0.60739	0.015152	0.14803	0.71026	-0.49358	0.0021645	0.025377	0.51864	-0.94719	0.0095238	0.060188	0.21449	-2.221	0.0095238	0.077098	0.32678	-1.6136	0.019048	0.11993	0.30199	-1.7274	0.066667	0.26984	0.41357	-1.2738
NEG	150.941	12.29	0.0021645	0.051826	1.1415	0.19094	0.015152	0.14803	1.1065	0.14601	0.025974	0.11236	1.1617	0.21627	0.019048	0.093317	1.1963	0.25858	0.91429	0.95707	1.048	0.06764	0.47619	0.68896	1.0812	0.11257	0.7619	0.90703	1.0298	0.042312
NEG	508.34	5.96	0.0021645	0.051826	0.72098	-0.47197	0.025974	0.18553	0.76855	-0.37979	0.0021645	0.025377	0.66152	-0.59614	0.0095238	0.060188	0.3513	-1.5092	0.038095	0.15643	0.48725	-1.0373	0.019048	0.11993	0.45709	-1.1294	0.11429	0.3578	0.53104	-0.9131
NEG	509.343	5.96	0.0021645	0.051826	0.7304	-0.45325	0.025974	0.18553	0.75873	-0.39834	0.0021645	0.025377	0.67967	-0.55708	0.0095238	0.060188	0.36453	-1.4559	0.066667	0.22266	0.49908	-1.0026	0.038095	0.17695	0.48045	-1.0576	0.11429	0.3578	0.53633	-0.89881
NEG	568.361	5.96	0.0021645	0.051826	0.7239	-0.46614	0.025974	0.18553	0.78131	-0.35604	0.0021645	0.025377	0.67325	-0.57078	0.0095238	0.060188	0.35681	-1.4868	0.066667	0.22266	0.49289	-1.0207	0.019048	0.11993	0.45668	-1.1308	0.11429	0.3578	0.52997	-0.91601
NEG	569.365	5.96	0.0021645	0.051826	0.72251	-0.4689	0.025974	0.18553	0.7782	-0.36179	0.0021645	0.025377	0.66131	-0.5966	0.0095238	0.060188	0.35298	-1.5023	0.038095	0.15643	0.48855	-1.0334	0.019048	0.11993	0.45359	-1.1405	0.11429	0.3578	0.53377	-0.90572
NEG	570.367	5.96	0.0021645	0.051826	0.72766	-0.45866	0.025974	0.18553	0.77398	-0.36963	0.0021645	0.025377	0.66343	-0.59199	0.0095238	0.060188	0.3561	-1.4897	0.038095	0.15643	0.48937	-1.031	0.019048	0.11993	0.46009	-1.12	0.11429	0.3578	0.53675	-0.89766
NEG	582.377	6.28	0.0021645	0.051826	0.31591	-1.6624	0.025974	0.18553	0.56612	-0.82083	0.0021645	0.025377	0.35589	-1.4905	0.0095238	0.060188	0.16038	-2.6404	0.11429	0.31236	0.50769	-0.97797	0.038095	0.17695	0.28331	-1.8196	0.11429	0.3578	0.45065	-1.1499
NEG	583.379	6.28	0.0021645	0.051826	0.35047	-1.5126	0.025974	0.18553	0.6434	-0.6362	0.0021645	0.025377	0.42055	-1.2496	0.0095238	0.060188	0.19638	-2.3483	0.11429	0.31236	0.56033	-0.83565	0.038095	0.17695	0.30522	-1.7121	0.066667	0.26984	0.46695	-1.0986
NEG	597.394	6.62	0.0021645	0.051826	0.4192	-1.2543	0.025974	0.18553	0.61421	-0.70321	0.0021645	0.025377	0.51598	-0.9546	0.0095238	0.060188	0.26687	-1.9058	0.038095	0.15643	0.63662	-0.65149	0.11429	0.33848	0.4345	-1.2026	0.019048	0.12901	0.51721	-0.95117
NEG	917.534	8.24	0.0021645	0.051826	0.58352	-0.77715	0.025974	0.18553	0.73357	-0.447	0.0021645	0.025377	0.58959	-0.76221	0.0095238	0.060188	0.562	-0.83136	0.91429	0.95707	0.96312	-0.054212	0.35238	0.58501	0.76612	-0.38437	1	1	0.9532	-0.069155
NEG	111.009	0.38	0.0021645	0.051826	0.37571	-1.4123	0.025974	0.18553	0.7113	-0.49147	0.004329	0.037357	0.77002	-0.37704	0.25714	0.48091	0.61474	-0.70195	0.066667	0.22266	1.6362	0.71035	0.60952	0.79159	0.86425	-0.21048	0.25714	0.51611	0.79835	-0.32491
NEG	668.286	5.96	0.0021645	0.051826	0.70033	-0.5139	0.025974	0.18553	0.78539	-0.34851	0.004329	0.037357	0.73977	-0.43485	0.0095238	0.060188	0.43663	-1.1955	0.11429	0.31236	0.62346	-0.68162	0.038095	0.17695	0.55593	-0.84701	0.038095	0.18772	0.59022	-0.76068
NEG	191.02	0.38	0.0021645	0.051826	0.35761	-1.4836	0.025974	0.18553	0.71245	-0.48914	0.015152	0.079011	0.77704	-0.36394	0.17143	0.38396	0.612	-0.70839	0.038095	0.15643	1.7114	0.77517	0.60952	0.79159	0.85901	-0.21925	0.25714	0.51611	0.78761	-0.34444
NEG	626.274	5.62	0.0021645	0.051826	0.51386	-0.96056	0.041126	0.23619	0.64328	-0.63647	0.0021645	0.025377	0.42553	-1.2327	0.0095238	0.060188	0.21454	-2.2207	0.019048	0.10445	0.4175	-1.2602	0.038095	0.17695	0.3335	-1.5842	0.066667	0.26984	0.50416	-0.98804
NEG	874.559	8.34	0.0021645	0.051826	0.39257	-1.349	0.041126	0.23619	0.63249	-0.66089	0.0021645	0.025377	0.34749	-1.5249	0.0095238	0.060188	0.21398	-2.2245	0.066667	0.22266	0.54507	-0.87548	0.066667	0.25241	0.33831	-1.5636	0.11429	0.3578	0.61578	-0.69952
NEG	942.549	8.34	0.0021645	0.051826	0.46776	-1.0961	0.041126	0.23619	0.68171	-0.55277	0.0021645	0.025377	0.45637	-1.1317	0.0095238	0.060188	0.3226	-1.6322	0.066667	0.22266	0.68967	-0.53602	0.066667	0.25241	0.47323	-1.0794	0.25714	0.51611	0.70689	-0.50045
NEG	1159.71	5.96	0.0021645	0.051826	0.67825	-0.56012	0.041126	0.23619	0.7353	-0.44359	0.0021645	0.025377	0.61434	-0.7029	0.0095238	0.060188	0.2684	-1.8975	0.038095	0.15643	0.39573	-1.3374	0.066667	0.25241	0.36502	-1.454	0.17143	0.44493	0.43689	-1.1946
NEG	510.346	5.96	0.0021645	0.051826	0.68627	-0.54314	0.041126	0.23619	0.744	-0.42663	0.004329	0.037357	0.65163	-0.61787	0.0095238	0.060188	0.34418	-1.5388	0.11429	0.31236	0.50152	-0.99563	0.066667	0.25241	0.46261	-1.1121	0.11429	0.3578	0.52818	-0.9209
NEG	561.332	5.96	0.0021645	0.051826	0.72239	-0.46915	0.064935	0.3041	0.79931	-0.32318	0.008658	0.05492	0.73975	-0.43489	0.038095	0.14719	0.46679	-1.0991	0.25714	0.48625	0.64618	-0.62999	0.17143	0.4122	0.584	-0.77597	0.25714	0.51611	0.63101	-0.66426
NEG	85.0296	0.38	0.0021645	0.051826	0.47719	-1.0674	0.064935	0.3041	0.75242	-0.41039	0.30952	0.5757	0.85708	-0.22251	0.17143	0.38396	0.77174	-0.37381	0.11429	0.31236	1.6173	0.69356	0.7619	0.88776	1.0257	0.036582	0.47619	0.72996	0.90043	-0.15131
NEG	875.563	8.34	0.0021645	0.051826	0.39474	-1.341	0.093074	0.37317	0.6282	-0.6707	0.0021645	0.025377	0.38143	-1.3905	0.0095238	0.060188	0.23499	-2.0893	0.17143	0.3965	0.59531	-0.74829	0.038095	0.17695	0.37407	-1.4186	0.066667	0.26984	0.61607	-0.69882
NEG	1010.53	8.34	0.0021645	0.051826	0.5697	-0.81174	0.093074	0.37317	0.72158	-0.47076	0.0021645	0.025377	0.54034	-0.88806	0.0095238	0.060188	0.35551	-1.492	0.038095	0.15643	0.62404	-0.68029	0.11429	0.33848	0.49268	-1.0213	0.0095238	0.088959	0.65794	-0.60397
NEG	500.277	5.11	0.0021645	0.051826	2.0793	1.0561	0.093074	0.37317	1.2772	0.35298	0.015152	0.079011	1.5364	0.61953	0.47619	0.67913	0.90482	-0.1443	0.0095238	0.077098	0.43516	-1.2004	0.17143	0.4122	0.70844	-0.49728	0.11429	0.3578	0.58893	-0.76383
NEG	596.391	6.62	0.0021645	0.051826	0.3561	-1.4897	0.093074	0.37317	0.58044	-0.78478	0.064935	0.21107	0.54727	-0.86967	0.0095238	0.060188	0.19534	-2.356	0.17143	0.3965	0.54855	-0.8663	0.019048	0.11993	0.33654	-1.5712	0.066667	0.26984	0.35693	-1.4863
NEG	580.359	5.78	0.0021645	0.051826	0.51962	-0.94448	0.13203	0.45254	0.69539	-0.52411	0.0021645	0.025377	0.46634	-1.1005	0.0095238	0.060188	0.18488	-2.4353	0.0095238	0.077098	0.3558	-1.4908	0.019048	0.11993	0.26587	-1.9112	0.0095238	0.088959	0.39645	-1.3348
NEG	129.018	0.38	0.0021645	0.051826	0.49806	-1.0056	0.13203	0.45254	0.78631	-0.34683	0.093074	0.26863	0.83521	-0.25978	0.17143	0.38396	0.73593	-0.44236	0.019048	0.10445	1.4776	0.56324	0.91429	0.9666	0.93593	-0.095528	0.25714	0.51611	0.88113	-0.18258
NEG	192.022	0.38	0.0021645	0.051826	0.36308	-1.4616	0.17965	0.5396	0.72078	-0.47237	0.008658	0.05492	0.75827	-0.39921	0.11429	0.30644	0.57931	-0.78758	0.25714	0.48625	1.5956	0.67407	0.47619	0.68896	0.80374	-0.31521	0.25714	0.51611	0.76399	-0.38837
NEG	568.268	5.1	0.0021645	0.051826	1.5832	0.66285	0.17965	0.5396	1.246	0.31736	0.015152	0.079011	1.5683	0.64921	0.60952	0.77559	1.0811	0.11252	0.066667	0.22266	0.68286	-0.55033	0.17143	0.4122	0.86763	-0.20484	0.11429	0.3578	0.68935	-0.53669
NEG	173.002	0.36	0.0021645	0.051826	0.4407	-1.1821	0.17965	0.5396	0.80773	-0.30805	0.30952	0.5757	0.86231	-0.21371	0.17143	0.38396	0.7295	-0.45502	0.038095	0.15643	1.6553	0.72711	0.60952	0.79159	0.90315	-0.14697	0.25714	0.51611	0.84598	-0.24131
NEG	833.517	12.16	0.0021645	0.051826	0.42268	-1.2424	0.17965	0.5396	0.81869	-0.28861	0.48485	0.73462	0.82147	-0.28373	0.066667	0.21465	0.71493	-0.48413	0.038095	0.15643	1.6914	0.75824	0.25714	0.49172	0.87325	-0.19553	0.47619	0.72996	0.8703	-0.20041
NEG	525.281	5.09	0.0021645	0.051826	2.259	1.1757	0.24026	0.6051	1.1466	0.19738	0.008658	0.05492	1.3549	0.43816	0.7619	0.8687	1.1901	0.25113	0.019048	0.10445	0.52684	-0.92458	0.91429	0.9666	1.038	0.053749	0.7619	0.90703	0.87841	-0.18703
NEG	407.207	3.21	0.0021645	0.051826	0.18523	-2.4326	0.24026	0.6051	0.78923	-0.34148	0.041126	0.15468	0.57248	-0.8047	0.11429	0.30644	2.0745	1.0528	0.0095238	0.077098	11.2	3.4854	0.019048	0.11993	2.6285	1.3943	0.0095238	0.088959	3.6237	1.8575
NEG	702.03	0.42	0.0021645	0.051826	1.1921	0.25353	0.24026	0.6051	1.1188	0.162	0.041126	0.15468	1.1538	0.20637	0.17143	0.38396	0.9453	-0.081158	0.0095238	0.077098	0.79296	-0.33468	0.11429	0.33848	0.8449	-0.24316	0.038095	0.18772	0.81931	-0.28752
NEG	501.281	5.11	0.0021645	0.051826	1.8678	0.90136	0.24026	0.6051	1.197	0.25936	0.064935	0.21107	1.4527	0.53873	0.7619	0.8687	0.93789	-0.092504	0.038095	0.15643	0.50213	-0.99386	0.17143	0.4122	0.78357	-0.35187	0.11429	0.3578	0.64562	-0.63123
NEG	133.012	0.35	0.0021645	0.051826	0.28003	-1.8363	0.24026	0.6051	0.75192	-0.41134	0.093074	0.26863	0.63534	-0.65441	0.11429	0.30644	0.49912	-1.0025	0.066667	0.22266	1.7824	0.8338	0.35238	0.58501	0.66379	-0.5912	0.35238	0.62271	0.7856	-0.34813
NEG	212.002	1.2	0.0021645	0.051826	0.28076	-1.8326	0.24026	0.6051	2.3106	1.2082	0.093074	0.26863	1.4942	0.57933	0.47619	0.67913	0.74166	-0.43117	1	1	2.6416	1.4014	0.11429	0.33848	0.32099	-1.6394	0.11429	0.3578	0.49638	-1.0105
NEG	114.993	0.29	0.0021645	0.051826	0.64617	-0.63001	0.24026	0.6051	0.87741	-0.18868	0.93723	0.96622	0.90136	-0.14983	0.60952	0.77559	0.8347	-0.26066	0.0095238	0.077098	1.2918	0.36934	0.60952	0.79159	0.95133	-0.07198	0.25714	0.51611	0.92605	-0.11083
NEG	858.617	10.08	0.0021645	0.051826	0.62122	-0.68683	0.39394	0.74	0.87591	-0.19114	0.025974	0.11236	0.79989	-0.32212	0.25714	0.48091	0.70172	-0.51102	0.7619	0.86812	1.1296	0.1758	0.25714	0.49172	0.80113	-0.31989	0.25714	0.51611	0.87727	-0.1889
NEG	332.19	3.21	0.0021645	0.051826	0.35385	-1.4988	0.39394	0.74	0.78032	-0.35787	0.064935	0.21107	0.66888	-0.58017	0.11429	0.30644	1.9218	0.94247	0.0095238	0.077098	5.4311	2.4412	0.0095238	0.10513	2.4629	1.3003	0.038095	0.18772	2.8732	1.5226
NEG	859.532	12.16	0.0021645	0.051826	0.38327	-1.3836	0.48485	0.80492	0.74434	-0.42597	0.093074	0.26863	0.6343	-0.65677	0.038095	0.14719	0.42026	-1.2506	0.60952	0.77155	1.0965	0.13294	0.066667	0.25241	0.56461	-0.82468	0.17143	0.44493	0.66256	-0.59387
NEG	945.566	8.66	0.0021645	0.051826	0.64898	-0.62376	0.48485	0.80492	0.91204	-0.13284	0.093074	0.26863	0.8527	-0.22989	0.0095238	0.060188	0.64931	-0.62303	0.91429	0.95707	1.0005	0.00073314	0.038095	0.17695	0.71193	-0.49019	0.11429	0.3578	0.76147	-0.39314
NEG	616.285	5.94	0.0021645	0.051826	1.7659	0.82043	0.48485	0.80492	1.152	0.20416	0.30952	0.5757	1.0659	0.092069	0.47619	0.67913	1.1828	0.24223	0.019048	0.10445	0.6698	-0.5782	0.91429	0.9666	1.0267	0.038069	0.7619	0.90703	1.1097	0.15016
NEG	502.293	5.32	0.0021645	0.051826	2.1232	1.0863	0.48485	0.80492	1.2503	0.32226	0.81818	0.92235	1.213	0.27864	0.11429	0.30644	0.69088	-0.53349	0.0095238	0.077098	0.32539	-1.6198	0.066667	0.25241	0.55258	-0.85575	0.17143	0.44493	0.56954	-0.81213
NEG	867.818	12.07	0.0021645	0.051826	0.88692	-0.17312	0.58874	0.86881	0.96209	-0.055762	0.48485	0.73462	1.0297	0.042169	0.91429	0.96003	0.96824	-0.046562	0.7619	0.86812	1.0917	0.12656	0.7619	0.88776	1.0064	0.0092003	0.47619	0.72996	0.94035	-0.08873
NEG	125.873	0.16	0.0021645	0.051826	0.82799	-0.27232	0.58874	0.86881	0.9768	-0.033863	0.93723	0.96622	1.009	0.012933	0.47619	0.67913	0.9504	-0.073396	0.019048	0.10445	1.1478	0.19892	0.91429	0.9666	0.97297	-0.039532	0.35238	0.62271	0.94192	-0.086329
NEG	331.19	3.21	0.0021645	0.051826	0.2417	-2.0487	0.69913	0.91075	0.91932	-0.12135	0.064935	0.21107	0.61422	-0.70316	0.038095	0.14719	2.2938	1.1977	0.0095238	0.077098	9.4901	3.2464	0.0095238	0.10513	2.4951	1.3191	0.0095238	0.088959	3.7344	1.9009
NEG	857.517	12.16	0.0021645	0.051826	0.47173	-1.084	0.69913	0.91075	0.95641	-0.064298	0.30952	0.5757	0.82136	-0.28391	0.25714	0.48091	0.7873	-0.34501	0.0095238	0.077098	1.669	0.73895	0.35238	0.58501	0.82319	-0.28071	0.7619	0.90703	0.95853	-0.061098
NEG	883.533	12.16	0.0021645	0.051826	0.46756	-1.0968	0.69913	0.91075	0.84338	-0.24575	0.58874	0.79245	0.7906	-0.33897	0.47619	0.67913	0.7709	-0.37538	0.0095238	0.077098	1.6488	0.72138	0.47619	0.68896	0.91406	-0.12964	1	1	0.97508	-0.036412
NEG	844.595	10.04	0.0021645	0.051826	0.53964	-0.88993	0.81818	0.95398	0.90456	-0.14471	0.39394	0.66372	0.75172	-0.41174	0.7619	0.8687	0.98861	-0.01653	0.35238	0.57325	1.832	0.8734	0.91429	0.9666	1.0929	0.12818	0.7619	0.90703	1.3151	0.39521
NEG	524.278	5.09	0.0021645	0.051826	2.1345	1.0939	0.93723	0.98595	1.0458	0.064599	0.064935	0.21107	1.3204	0.401	1	1	1.0475	0.066974	0.038095	0.15643	0.49074	-1.027	1	1	1.0016	0.0023754	0.47619	0.72996	0.79332	-0.33403
NEG	592.266	5.08	0.0021645	0.051826	1.9215	0.9422	0.93723	0.98595	1.0116	0.016616	0.093074	0.26863	1.3247	0.40568	0.7619	0.8687	1.1112	0.15206	0.0095238	0.077098	0.57829	-0.79014	0.60952	0.79159	1.0984	0.13544	0.47619	0.72996	0.83879	-0.25362
NEG	593.263	5.08	0.0021645	0.051826	1.9066	0.931	1	1	1.0109	0.015679	0.004329	0.037357	1.3769	0.46139	0.60952	0.77559	1.2245	0.29217	0.066667	0.22266	0.64223	-0.63883	0.47619	0.68896	1.2112	0.27649	0.7619	0.90703	0.88932	-0.16922
NEG	615.341	5.26	0.004329	0.078291	1.5037	0.5885	0.0021645	0.073593	0.65654	-0.60705	0.24026	0.49508	0.81751	-0.2907	0.11429	0.30644	0.54494	-0.87582	0.0095238	0.077098	0.36241	-1.4643	0.60952	0.79159	0.83003	-0.26876	0.47619	0.72996	0.66659	-0.58512
NEG	641.294	5.96	0.004329	0.078291	0.7953	-0.33042	0.025974	0.18553	0.79719	-0.327	0.0021645	0.025377	0.69607	-0.5227	0.0095238	0.060188	0.40836	-1.2921	0.019048	0.10445	0.51347	-0.96165	0.038095	0.17695	0.51225	-0.96507	0.066667	0.26984	0.58667	-0.76937
NEG	636.348	5.96	0.004329	0.078291	0.7715	-0.37427	0.041126	0.23619	0.82263	-0.28168	0.004329	0.037357	0.7593	-0.39726	0.0095238	0.060188	0.45179	-1.1463	0.17143	0.3965	0.58561	-0.77199	0.11429	0.33848	0.54921	-0.86458	0.066667	0.26984	0.59501	-0.74901
NEG	584.355	4.45	0.004329	0.078291	0.55739	-0.84325	0.041126	0.23619	0.59612	-0.74631	0.008658	0.05492	0.46452	-1.1062	0.0095238	0.060188	0.11293	-3.1465	0.0095238	0.077098	0.20261	-2.3032	0.019048	0.11993	0.18944	-2.4002	0.0095238	0.088959	0.24311	-2.0403
NEG	558.332	5.96	0.004329	0.078291	0.79111	-0.33806	0.064935	0.3041	0.8253	-0.277	0.0021645	0.025377	0.72642	-0.46111	0.0095238	0.060188	0.42831	-1.2233	0.17143	0.3965	0.5414	-0.88523	0.066667	0.25241	0.51897	-0.94628	0.17143	0.44493	0.58961	-0.76217
NEG	637.351	5.96	0.004329	0.078291	0.76876	-0.3794	0.064935	0.3041	0.82554	-0.27659	0.0021645	0.025377	0.69905	-0.51652	0.0095238	0.060188	0.44484	-1.1687	0.038095	0.15643	0.57864	-0.78925	0.019048	0.11993	0.53884	-0.89206	0.17143	0.44493	0.63634	-0.65213
NEG	571.367	5.96	0.004329	0.078291	0.65431	-0.61194	0.064935	0.3041	0.76587	-0.38483	0.004329	0.037357	0.65838	-0.60301	0.019048	0.093317	0.37818	-1.4028	0.25714	0.48625	0.57799	-0.7909	0.066667	0.25241	0.4938	-1.018	0.17143	0.44493	0.57442	-0.79983
NEG	916.533	8.24	0.004329	0.078291	0.5952	-0.74854	0.093074	0.37317	0.76144	-0.3932	0.0021645	0.025377	0.53598	-0.89974	0.0095238	0.060188	0.41083	-1.2834	0.17143	0.3965	0.69023	-0.53484	0.038095	0.17695	0.53955	-0.89018	0.11429	0.3578	0.7665	-0.38365
NEG	1164.66	5.96	0.004329	0.078291	0.67856	-0.55945	0.093074	0.37317	0.78581	-0.34775	0.004329	0.037357	0.67914	-0.55822	0.066667	0.21465	0.37239	-1.4251	0.25714	0.48625	0.54879	-0.86567	0.11429	0.33848	0.47389	-1.0774	0.25714	0.51611	0.54832	-0.8669
NEG	640.291	5.96	0.004329	0.078291	0.79949	-0.32284	0.13203	0.45254	0.85702	-0.22259	0.0021645	0.025377	0.7451	-0.4245	0.0095238	0.060188	0.41653	-1.2635	0.019048	0.10445	0.521	-0.94065	0.019048	0.11993	0.48602	-1.0409	0.038095	0.18772	0.55903	-0.83899
NEG	836.544	8.41	0.004329	0.078291	0.60408	-0.72719	0.13203	0.45254	0.67133	-0.57491	0.24026	0.49508	0.76637	-0.38389	0.47619	0.67913	0.73687	-0.44053	0.35238	0.57325	1.2198	0.28666	1	1	1.0976	0.13438	0.91429	0.97692	0.9615	-0.056639
NEG	1149.68	5.96	0.004329	0.078291	0.68821	-0.53908	0.17965	0.5396	0.8326	-0.26431	0.008658	0.05492	0.70761	-0.49897	0.0095238	0.060188	0.39866	-1.3268	0.038095	0.15643	0.57926	-0.78771	0.038095	0.17695	0.47881	-1.0625	0.038095	0.18772	0.56338	-0.82781
NEG	716.292	5.95	0.004329	0.078291	0.71976	-0.47442	0.17965	0.5396	0.83426	-0.26143	0.064935	0.21107	0.77466	-0.36836	0.0095238	0.060188	0.43098	-1.2143	0.0095238	0.077098	0.59879	-0.73988	0.038095	0.17695	0.51661	-0.95287	0.038095	0.18772	0.55635	-0.84593
NEG	87.0045	0.34	0.004329	0.078291	0.57862	-0.7893	0.24026	0.6051	0.86425	-0.21048	0.064935	0.21107	0.86852	-0.20337	0.17143	0.38396	0.82719	-0.27372	0.019048	0.10445	1.4296	0.51559	0.7619	0.88776	0.95711	-0.063239	0.47619	0.72996	0.95241	-0.070352
NEG	823.533	8.2	0.004329	0.078291	0.7336	-0.44693	0.39394	0.74	0.87965	-0.18501	0.093074	0.26863	0.78084	-0.3569	0.038095	0.14719	0.69525	-0.52441	0.7619	0.86812	0.94771	-0.077479	0.47619	0.68896	0.79037	-0.3394	0.7619	0.90703	0.89038	-0.16751
NEG	788.54	8.65	0.004329	0.078291	0.70797	-0.49824	0.39394	0.74	0.90275	-0.1476	0.30952	0.5757	0.76972	-0.37759	0.038095	0.14719	0.48732	-1.037	0.35238	0.57325	0.68834	-0.53881	0.11429	0.33848	0.53982	-0.88945	0.25714	0.51611	0.63311	-0.65946
NEG	303.916	0.32	0.004329	0.078291	0.72804	-0.45792	0.39394	0.74	0.89327	-0.16284	0.93723	0.96622	1.027	0.038483	0.0095238	0.060188	0.65487	-0.61072	0.47619	0.67517	0.89951	-0.1528	0.066667	0.25241	0.73312	-0.44788	0.038095	0.18772	0.63763	-0.6492
NEG	264.895	3.62	0.004329	0.078291	0.75541	-0.40466	0.48485	0.80492	0.95874	-0.060793	1	1	1.0074	0.010674	0.0095238	0.060188	0.69605	-0.52273	0.60952	0.77155	0.92142	-0.11807	0.066667	0.25241	0.72601	-0.46194	0.038095	0.18772	0.69092	-0.5334
NEG	496.302	4.01	0.004329	0.078291	2.4467	1.2909	0.58874	0.86881	1.1591	0.21306	0.015152	0.079011	0.63006	-0.66644	0.60952	0.77559	3.2791	1.7133	1	1	1.3402	0.42245	0.47619	0.68896	2.8289	1.5002	0.25714	0.51611	5.2045	2.3798
NEG	543.275	2.98	0.004329	0.078291	2.0776	1.0549	0.69913	0.91075	0.89413	-0.16145	0.17965	0.41666	0.75709	-0.40146	0.17143	0.38396	1.8615	0.89643	0.91429	0.95707	0.89598	-0.15846	0.11429	0.33848	2.0819	1.0579	0.11429	0.3578	2.4587	1.2979
NEG	546.877	0.34	0.004329	0.078291	1.1746	0.23212	0.69913	0.91075	1.0391	0.055384	0.81818	0.92235	1.0332	0.047124	0.0095238	0.060188	0.69134	-0.53253	0.0095238	0.077098	0.5886	-0.76465	0.0095238	0.10513	0.6653	-0.58791	0.0095238	0.088959	0.66912	-0.57965
NEG	329.169	3.2	0.004329	0.078291	0.42864	-1.2222	0.81818	0.95398	1.0058	0.0082823	0.58874	0.79245	0.85059	-0.23347	0.91429	0.96003	0.88923	-0.16937	0.066667	0.22266	2.0746	1.0528	0.60952	0.79159	0.88414	-0.17765	0.7619	0.90703	1.0454	0.0641
NEG	190.05	0.48	0.004329	0.078291	1.4663	0.55215	0.93723	0.98595	1.0316	0.044822	0.13203	0.34269	1.2447	0.31583	0.0095238	0.060188	1.5046	0.58934	0.91429	0.95707	1.0261	0.037189	0.038095	0.17695	1.4585	0.54452	0.11429	0.3578	1.2087	0.2735
NEG	399.184	3.68	0.008658	0.10513	0.46579	-1.1023	0.0021645	0.073593	0.12019	-3.0566	0.025974	0.11236	0.2973	-1.75	0.0095238	0.060188	0.10235	-3.2884	0.0095238	0.077098	0.21974	-2.1861	0.60952	0.79159	0.85159	-0.23177	0.91429	0.97692	0.34428	-1.5384
NEG	593.477	7.59	0.008658	0.10513	0.53617	-0.89924	0.0021645	0.073593	4.4025	2.1383	0.93723	0.96622	2.8212	1.4963	0.0095238	0.060188	2.0074	1.0054	0.0095238	0.077098	3.744	1.9046	0.019048	0.11993	0.45597	-1.133	1	1	0.71154	-0.49097
NEG	560.331	5.96	0.008658	0.10513	0.75998	-0.39596	0.004329	0.082689	0.77676	-0.36445	0.0021645	0.025377	0.71973	-0.47447	0.0095238	0.060188	0.44097	-1.1812	0.066667	0.22266	0.58024	-0.78528	0.038095	0.17695	0.5677	-0.81679	0.11429	0.3578	0.61269	-0.70677
NEG	527.315	5.06	0.008658	0.10513	0.60644	-0.72157	0.008658	0.1141	0.62792	-0.67135	0.0021645	0.025377	0.48133	-1.0549	0.0095238	0.060188	0.19702	-2.3436	0.0095238	0.077098	0.32488	-1.622	0.0095238	0.10513	0.31377	-1.6722	0.019048	0.12901	0.40933	-1.2887
NEG	559.336	5.96	0.008658	0.10513	0.8118	-0.3008	0.008658	0.1141	0.78005	-0.35836	0.008658	0.05492	0.74293	-0.42871	0.0095238	0.060188	0.40541	-1.3026	0.019048	0.10445	0.49939	-1.0017	0.038095	0.17695	0.51972	-0.9442	0.038095	0.18772	0.54569	-0.87384
NEG	417.118	2.68	0.008658	0.10513	0.21666	-2.2065	0.025974	0.18553	0.45028	-1.1511	0.093074	0.26863	0.54295	-0.88112	0.0095238	0.060188	0.024727	-5.3378	0.019048	0.10445	0.11413	-3.1313	0.0095238	0.10513	0.054914	-4.1867	0.0095238	0.088959	0.045542	-4.4567
NEG	614.335	5.26	0.008658	0.10513	1.4959	0.58103	0.025974	0.18553	0.68226	-0.55161	0.13203	0.34269	0.78469	-0.3498	0.25714	0.48091	0.56574	-0.82178	0.0095238	0.077098	0.37819	-1.4028	0.7619	0.88776	0.82922	-0.27017	0.60952	0.82434	0.72097	-0.47198
NEG	226.018	2.45	0.008658	0.10513	0.34261	-1.5454	0.025974	0.18553	0.31641	-1.6601	0.48485	0.73462	0.70246	-0.50952	0.0095238	0.060188	0.054037	-4.2099	0.019048	0.10445	0.15772	-2.6645	0.35238	0.58501	0.17078	-2.5498	0.0095238	0.088959	0.076926	-3.7004
NEG	353.033	3.04	0.008658	0.10513	0.30374	-1.7191	0.025974	0.18553	13.378	3.7418	0.93723	0.96622	1.3508	0.43379	0.25714	0.48091	2.0664	1.0471	0.47619	0.67517	6.8031	2.7662	0.066667	0.25241	0.15445	-2.6947	0.25714	0.51611	1.5298	0.6133
NEG	595.379	6.09	0.008658	0.10513	0.61836	-0.69348	0.064935	0.3041	0.6569	-0.60625	0.008658	0.05492	0.56467	-0.82452	0.0095238	0.060188	0.226	-2.1456	0.038095	0.15643	0.36549	-1.4521	0.038095	0.17695	0.34404	-1.5393	0.11429	0.3578	0.40024	-1.3211
NEG	229.138	3.64	0.008658	0.10513	0.47493	-1.0742	0.064935	0.3041	0.7188	-0.47633	0.041126	0.15468	0.65339	-0.61399	0.0095238	0.060188	0.42654	-1.2292	0.91429	0.95707	0.89812	-0.15502	0.0095238	0.10513	0.5934	-0.75292	0.11429	0.3578	0.65281	-0.61526
NEG	181.051	1.02	0.008658	0.10513	0.41591	-1.2657	0.064935	0.3041	0.61473	-0.70198	0.064935	0.21107	0.5801	-0.78562	0.17143	0.38396	0.69622	-0.52238	0.038095	0.15643	1.674	0.74328	0.60952	0.79159	1.1326	0.1796	0.35238	0.62271	1.2002	0.26324
NEG	620.293	5.53	0.008658	0.10513	1.5992	0.67733	0.093074	0.37317	1.3245	0.40548	0.008658	0.05492	1.4235	0.50949	0.019048	0.093317	1.5921	0.6709	1	1	0.99555	-0.0064329	0.35238	0.58501	1.202	0.26542	0.60952	0.82434	1.1184	0.16141
NEG	704.335	5.95	0.008658	0.10513	0.80681	-0.3097	0.13203	0.45254	0.89481	-0.16035	0.0021645	0.025377	0.76076	-0.39449	0.019048	0.093317	0.55085	-0.86027	0.25714	0.48625	0.68275	-0.55057	0.066667	0.25241	0.6156	-0.69993	0.25714	0.51611	0.72408	-0.46578
NEG	161.926	0.15	0.008658	0.10513	0.82425	-0.27885	0.13203	0.45254	0.88038	-0.18381	0.81818	0.92235	0.99223	-0.011258	0.11429	0.30644	0.87795	-0.18779	0.35238	0.57325	1.0652	0.091059	0.91429	0.9666	0.99725	-0.0039779	0.17143	0.44493	0.88483	-0.17653
NEG	709.282	5.96	0.008658	0.10513	0.76562	-0.3853	0.17965	0.5396	0.86569	-0.20807	0.008658	0.05492	0.82247	-0.28196	0.0095238	0.060188	0.50875	-0.97498	0.066667	0.22266	0.66449	-0.58969	0.019048	0.11993	0.58768	-0.76691	0.038095	0.18772	0.61856	-0.69302
NEG	1044.61	5.11	0.008658	0.10513	1.7447	0.80296	0.17965	0.5396	0.78784	-0.34402	0.30952	0.5757	0.84632	-0.24072	0.0095238	0.060188	0.28438	-1.8141	0.0095238	0.077098	0.163	-2.617	0.0095238	0.10513	0.36097	-1.4701	0.0095238	0.088959	0.33602	-1.5734
NEG	738.507	8.58	0.008658	0.10513	0.41375	-1.2732	0.24026	0.6051	0.64202	-0.63931	0.004329	0.037357	0.26444	-1.919	0.0095238	0.060188	0.11948	-3.0652	0.019048	0.10445	0.28876	-1.792	0.0095238	0.10513	0.18609	-2.4259	0.066667	0.26984	0.4518	-1.1462
NEG	674.395	7.92	0.008658	0.10513	1.7348	0.79475	0.30952	0.67547	0.95949	-0.059661	0.0021645	0.025377	0.54599	-0.87304	0.47619	0.67913	0.82699	-0.27406	0.019048	0.10445	0.47671	-1.0688	0.91429	0.9666	0.86191	-0.2144	0.25714	0.51611	1.5146	0.59898
NEG	605.405	7.91	0.008658	0.10513	1.7521	0.80908	0.39394	0.74	0.91402	-0.1297	0.0021645	0.025377	0.53848	-0.89303	0.17143	0.38396	0.75281	-0.40964	0.019048	0.10445	0.42966	-1.2187	0.60952	0.79159	0.82363	-0.27993	0.60952	0.82434	1.398	0.48339
NEG	481.311	5.94	0.008658	0.10513	1.5556	0.63744	0.39394	0.74	0.87567	-0.19154	0.004329	0.037357	0.70081	-0.51291	0.019048	0.093317	0.6467	-0.62883	0.0095238	0.077098	0.41573	-1.2663	0.35238	0.58501	0.73852	-0.43729	0.91429	0.97692	0.92279	-0.11592
NEG	686.267	5.27	0.008658	0.10513	1.3323	0.41392	0.39394	0.74	0.88737	-0.17239	0.025974	0.11236	0.84309	-0.24624	0.25714	0.48091	0.68629	-0.54311	0.11429	0.31236	0.51511	-0.95704	0.47619	0.68896	0.77339	-0.37072	0.47619	0.72996	0.81402	-0.29687
NEG	954.539	12.15	0.008658	0.10513	0.71255	-0.48893	0.39394	0.74	0.89005	-0.16805	0.39394	0.66372	1.1384	0.18695	0.60952	0.77559	1.2237	0.29122	0.019048	0.10445	1.7173	0.78015	0.11429	0.33848	1.3748	0.45927	1	1	1.075	0.10427
NEG	480.309	5.94	0.008658	0.10513	1.5132	0.59762	0.48485	0.80492	0.88482	-0.17655	0.025974	0.11236	0.76376	-0.38882	0.11429	0.30644	0.69093	-0.53339	0.0095238	0.077098	0.4566	-1.131	0.47619	0.68896	0.78087	-0.35684	0.91429	0.97692	0.90465	-0.14458
NEG	877.578	8.66	0.008658	0.10513	0.54529	-0.87489	0.48485	0.80492	0.88163	-0.18176	0.093074	0.26863	0.71918	-0.47557	0.066667	0.21465	0.54795	-0.86789	0.7619	0.86812	1.0049	0.0070078	0.25714	0.49172	0.62152	-0.68613	0.35238	0.62271	0.7619	-0.39232
NEG	454.285	5.32	0.008658	0.10513	1.5759	0.65616	0.48485	0.80492	1.114	0.15574	0.13203	0.34269	0.73605	-0.44212	0.35238	0.57216	0.77498	-0.36778	0.0095238	0.077098	0.49177	-1.0239	0.11429	0.33848	0.69567	-0.52352	0.47619	0.72996	1.0529	0.074347
NEG	660.259	5.11	0.008658	0.10513	1.3533	0.4365	0.58874	0.86881	1.1306	0.17707	0.015152	0.079011	1.2562	0.32902	1	1	1.0268	0.038191	0.25714	0.48625	0.75874	-0.39831	0.7619	0.88776	0.90823	-0.13888	0.35238	0.62271	0.81743	-0.29083
NEG	876.575	8.66	0.008658	0.10513	0.58031	-0.78511	0.58874	0.86881	0.90189	-0.14898	0.093074	0.26863	0.75624	-0.40308	0.11429	0.30644	0.60606	-0.72246	0.60952	0.77155	1.0444	0.062648	0.47619	0.68896	0.67199	-0.57349	0.91429	0.97692	0.80141	-0.31939
NEG	593.253	3.16	0.008658	0.10513	2.6019	1.3796	0.58874	0.86881	1.2667	0.34103	1	1	0.83627	-0.25796	0.019048	0.093317	3.883	1.9572	0.60952	0.77155	1.4924	0.57761	0.019048	0.11993	3.0655	1.6161	0.0095238	0.088959	4.6432	2.2151
NEG	548.296	5.93	0.008658	0.10513	1.5698	0.65056	0.69913	0.91075	0.98124	-0.027324	0.093074	0.26863	0.84276	-0.2468	0.91429	0.96003	0.88121	-0.18244	0.038095	0.15643	0.56136	-0.833	0.7619	0.88776	0.89806	-0.15511	0.60952	0.82434	1.0456	0.064367
NEG	541.264	3.03	0.008658	0.10513	2.0061	1.0044	0.81818	0.95398	0.87394	-0.19439	0.13203	0.34269	0.67134	-0.57489	0.17143	0.38396	2.0546	1.0389	0.60952	0.77155	1.0242	0.034474	0.11429	0.33848	2.351	1.2333	0.11429	0.3578	3.0605	1.6138
NEG	542.268	3.03	0.008658	0.10513	2.031	1.0222	0.81818	0.95398	0.87367	-0.19485	0.13203	0.34269	0.6665	-0.58532	0.17143	0.38396	2.0701	1.0497	0.60952	0.77155	1.0193	0.027525	0.11429	0.33848	2.3695	1.2446	0.11429	0.3578	3.1059	1.635
NEG	529.311	5.12	0.008658	0.10513	1.3091	0.38852	0.81818	0.95398	1.0345	0.048914	0.24026	0.49508	#N/A	#N/A	0.35238	0.57216	0.80249	-0.31744	0.11429	0.31236	0.61303	-0.70596	0.35238	0.58501	0.77574	-0.36636	0.60952	0.82434	0.80248	-0.31746
NEG	799.532	8.32	0.008658	0.10513	0.71996	-0.47402	0.81818	0.95398	0.92141	-0.11808	0.24026	0.49508	0.80887	-0.30601	0.0095238	0.060188	0.5473	-0.8696	0.066667	0.22266	0.76018	-0.39558	0.019048	0.11993	0.59398	-0.75152	0.25714	0.51611	0.67662	-0.56358
NEG	525.27	3.17	0.008658	0.10513	2.6231	1.3913	0.81818	0.95398	1.1614	0.21592	0.39394	0.66372	0.71947	-0.47498	0.0095238	0.060188	5.1925	2.3764	0.25714	0.48625	1.9795	0.98515	0.019048	0.11993	4.4707	2.1605	0.0095238	0.088959	7.2171	2.8514
NEG	639.176	3.04	0.008658	0.10513	2.061	1.0433	0.81818	0.95398	1.0108	0.015489	0.69913	0.86627	0.91188	-0.13308	0.25714	0.48091	2.4271	1.2792	0.47619	0.67517	1.1777	0.23591	0.25714	0.49172	2.4012	1.2638	0.25714	0.51611	2.6616	1.4123
NEG	677.235	3.03	0.008658	0.10513	1.7126	0.77622	0.81818	0.95398	0.86417	-0.21061	0.69913	0.86627	0.78463	-0.34992	0.11429	0.30644	1.7503	0.80761	0.60952	0.77155	1.022	0.031385	0.066667	0.25241	2.0254	1.0182	0.11429	0.3578	2.2308	1.1575
NEG	452.277	5.32	0.008658	0.10513	1.6024	0.6802	0.93723	0.98595	0.96745	-0.047746	0.025974	0.11236	0.67842	-0.55975	0.17143	0.38396	0.69365	-0.52773	0.0095238	0.077098	0.43289	-1.2079	0.25714	0.49172	0.71699	-0.47998	0.60952	0.82434	1.0224	0.032023
NEG	1060.79	12.04	0.008658	0.10513	0.8558	-0.22465	0.93723	0.98595	0.98041	-0.02854	0.025974	0.11236	0.91482	-0.12844	1	1	0.9906	-0.013619	0.019048	0.10445	1.1575	0.21103	1	1	1.0104	0.01492	0.25714	0.51611	1.0828	0.11482
NEG	599.216	3.03	0.008658	0.10513	1.8333	0.87443	0.93723	0.98595	0.86654	-0.20667	0.30952	0.5757	0.78775	-0.3442	0.25714	0.48091	1.7055	0.77016	0.91429	0.95707	0.93028	-0.10427	0.25714	0.49172	1.9681	0.97683	0.25714	0.51611	2.165	1.1144
NEG	539.249	3.03	0.008658	0.10513	2.1584	1.11	0.93723	0.98595	1.0365	0.051687	0.48485	0.73462	0.83279	-0.26398	0.25714	0.48091	2.7277	1.4477	0.47619	0.67517	1.2637	0.33768	0.25714	0.49172	2.6317	1.396	0.25714	0.51611	3.2753	1.7116
NEG	608.24	3.03	0.008658	0.10513	1.9202	0.94122	0.93723	0.98595	0.99103	-0.013005	0.48485	0.73462	0.84789	-0.23805	0.25714	0.48091	2.399	1.2625	0.60952	0.77155	1.2494	0.32123	0.25714	0.49172	2.4208	1.2755	0.25714	0.51611	2.8294	1.5005
NEG	540.252	3.03	0.008658	0.10513	2.2102	1.1442	0.93723	0.98595	1.037	0.052394	0.58874	0.79245	0.87004	-0.20085	0.25714	0.48091	2.8214	1.4964	0.47619	0.67517	1.2766	0.35226	0.25714	0.49172	2.7208	1.444	0.25714	0.51611	3.2429	1.6973
NEG	436.282	5.5	0.008658	0.10513	1.3331	0.41479	1	1	1.011	0.015809	0.48485	0.73462	1.0663	0.092606	0.7619	0.8687	1.061	0.085363	0.25714	0.48625	0.79585	-0.32943	0.60952	0.79159	1.0494	0.069554	0.60952	0.82434	0.99499	-0.0072437
NEG	641.187	3.03	0.008658	0.10513	1.9434	0.95862	1	1	0.97821	-0.03179	0.58874	0.79245	0.84268	-0.24693	0.17143	0.38396	1.9517	0.96474	0.7619	0.86812	1.0043	0.0061207	0.25714	0.49172	1.9952	0.99653	0.11429	0.3578	2.3161	1.2117
NEG	526.273	3.17	0.008658	0.10513	2.7945	1.4826	1	1	1.1279	0.17367	0.81818	0.92235	0.77956	-0.35927	0.0095238	0.060188	5.5728	2.4784	0.25714	0.48625	1.9942	0.99578	0.019048	0.11993	4.9407	2.3047	0.0095238	0.088959	7.1486	2.8377
NEG	838.56	8.61	0.015152	0.15802	0.81314	-0.29842	0.0021645	0.073593	0.75002	-0.415	0.0021645	0.025377	0.74615	-0.42246	0.25714	0.48091	0.87502	-0.19262	1	1	1.0761	0.1058	0.47619	0.68896	1.1667	0.22238	0.7619	0.90703	1.1727	0.22984
NEG	717.295	5.95	0.015152	0.15802	0.81038	-0.30332	0.015152	0.14803	0.8115	-0.30134	0.041126	0.15468	0.8141	-0.29672	0.066667	0.21465	0.5741	-0.80064	0.25714	0.48625	0.70843	-0.49731	0.25714	0.49172	0.70745	-0.49929	0.25714	0.51611	0.70519	-0.50392
NEG	898.557	8.25	0.015152	0.15802	0.51574	-0.95527	0.025974	0.18553	0.64504	-0.63254	0.0021645	0.025377	0.44546	-1.1666	0.0095238	0.060188	0.32943	-1.602	0.60952	0.77155	0.63874	-0.64671	0.066667	0.25241	0.51071	-0.96944	0.25714	0.51611	0.73952	-0.43534
NEG	277.167	4.79	0.015152	0.15802	0.85243	-0.23034	0.041126	0.23619	0.87485	-0.1929	0.015152	0.079011	0.82515	-0.27727	0.066667	0.21465	0.874	-0.19429	0.91429	0.95707	1.0253	0.036048	0.91429	0.9666	0.99903	-0.0013933	0.7619	0.90703	1.0592	0.08298
NEG	581.242	4.14	0.015152	0.15802	1.5941	0.67275	0.041126	0.23619	1.833	0.8742	0.025974	0.11236	1.7775	0.82988	0.0095238	0.060188	2.8383	1.505	0.019048	0.10445	1.7805	0.83228	0.066667	0.25241	1.5485	0.63083	0.066667	0.26984	1.5968	0.67515
NEG	849.547	8.24	0.015152	0.15802	0.51155	-0.96706	0.064935	0.3041	0.69297	-0.52913	0.0021645	0.025377	0.46411	-1.1074	0.0095238	0.060188	0.31107	-1.6847	0.11429	0.31236	0.60809	-0.71764	0.019048	0.11993	0.44889	-1.1556	0.019048	0.12901	0.67024	-0.57725
NEG	524.334	5.51	0.015152	0.15802	0.75037	-0.41433	0.13203	0.45254	0.70409	-0.50616	0.004329	0.037357	0.65367	-0.61336	0.17143	0.38396	0.42729	-1.2267	0.25714	0.48625	0.56944	-0.81238	0.25714	0.49172	0.60687	-0.72055	0.25714	0.51611	0.65368	-0.61335
NEG	526.311	5.06	0.015152	0.15802	0.57145	-0.80731	0.13203	0.45254	0.69385	-0.52731	0.008658	0.05492	0.5035	-0.98994	0.0095238	0.060188	0.20045	-2.3187	0.0095238	0.077098	0.35078	-1.5114	0.019048	0.11993	0.2889	-1.7914	0.0095238	0.088959	0.39812	-1.3287
NEG	837.548	8.41	0.015152	0.15802	0.60405	-0.72726	0.13203	0.45254	0.71122	-0.49164	0.24026	0.49508	0.81621	-0.29298	1	1	0.91069	-0.13497	0.35238	0.57325	1.5076	0.59229	0.47619	0.68896	1.2805	0.35666	0.60952	0.82434	1.1157	0.15801
NEG	786.516	8.37	0.015152	0.15802	0.59364	-0.75234	0.24026	0.6051	0.70821	-0.49776	0.004329	0.037357	0.49562	-1.0127	0.0095238	0.060188	0.3358	-1.5743	0.038095	0.15643	0.56565	-0.82201	0.019048	0.11993	0.47415	-1.0766	0.35238	0.62271	0.67753	-0.56164
NEG	445.331	6.88	0.015152	0.15802	1.5073	0.59199	0.24026	0.6051	1.4722	0.55799	0.041126	0.15468	1.776	0.82863	0.25714	0.48091	1.2559	0.3287	0.60952	0.77155	0.83319	-0.26329	0.7619	0.88776	0.85305	-0.22929	0.7619	0.90703	0.70714	-0.49993
NEG	776.264	5.95	0.015152	0.15802	0.74566	-0.42341	0.24026	0.6051	0.90528	-0.14357	0.48485	0.73462	0.93873	-0.09121	0.019048	0.093317	0.62771	-0.67184	0.35238	0.57325	0.84182	-0.24842	0.019048	0.11993	0.69339	-0.52827	0.038095	0.18772	0.66867	-0.58062
NEG	818.568	9.05	0.015152	0.15802	0.75422	-0.40695	0.48485	0.80492	0.89703	-0.15678	0.025974	0.11236	0.80664	-0.31	0.25714	0.48091	0.86393	-0.21102	0.47619	0.67517	1.1455	0.19593	1	1	0.9631	-0.054243	0.7619	0.90703	1.071	0.098982
NEG	563.244	3.02	0.015152	0.15802	1.9311	0.94945	0.48485	0.80492	0.86312	-0.21236	0.093074	0.26863	0.73874	-0.43687	0.25714	0.48091	1.8728	0.90523	0.7619	0.86812	0.96981	-0.044222	0.17143	0.4122	2.1698	1.1176	0.17143	0.44493	2.5352	1.3421
NEG	798.528	8.32	0.015152	0.15802	0.71821	-0.47753	0.69913	0.91075	0.94372	-0.083564	0.58874	0.79245	0.82818	-0.27198	0.0095238	0.060188	0.5345	-0.90375	0.17143	0.3965	0.74421	-0.42622	0.066667	0.25241	0.56637	-0.82019	0.47619	0.72996	0.64538	-0.63177
NEG	741.383	7.91	0.015152	0.15802	1.6791	0.7477	0.81818	0.95398	1.0866	0.11983	0.004329	0.037357	0.60411	-0.72712	0.47619	0.67913	0.83663	-0.25734	0.019048	0.10445	0.49826	-1.005	0.47619	0.68896	0.76995	-0.37717	0.25714	0.51611	1.3849	0.46978
NEG	947.61	5.33	0.015152	0.15802	1.6575	0.72901	0.81818	0.95398	0.93628	-0.094984	0.004329	0.037357	0.53649	-0.89837	0.11429	0.30644	0.42395	-1.238	0.019048	0.10445	0.25578	-1.967	0.066667	0.25241	0.45281	-1.143	0.25714	0.51611	0.79023	-0.33965
NEG	919.551	8.63	0.015152	0.15802	1.1598	0.21384	0.81818	0.95398	1.0538	0.07554	0.008658	0.05492	1.2837	0.3603	0.0095238	0.060188	1.218	0.28451	0.17143	0.3965	1.0502	0.070673	0.11429	0.33848	1.1559	0.20897	0.25714	0.51611	0.94882	-0.075795
NEG	453.281	5.32	0.015152	0.15802	1.6561	0.72781	0.81818	0.95398	1.0275	0.039137	0.064935	0.21107	0.72815	-0.45769	0.25714	0.48091	0.71929	-0.47536	0.019048	0.10445	0.43432	-1.2032	0.17143	0.4122	0.70004	-0.5145	0.91429	0.97692	0.98783	-0.017669
NEG	588.33	5.12	0.015152	0.15802	1.2512	0.32331	0.93723	0.98595	1.0309	0.043903	0.69913	0.86627	1.1396	0.18859	0.25714	0.48091	0.67743	-0.56186	0.11429	0.31236	0.54142	-0.88517	0.25714	0.49172	0.65713	-0.60576	0.11429	0.3578	0.59442	-0.75045
NEG	944.561	8.66	0.015152	0.15802	0.66887	-0.5802	1	1	0.99197	-0.011638	0.24026	0.49508	0.81962	-0.28698	0.019048	0.093317	0.62158	-0.68598	0.91429	0.95707	0.9293	-0.10578	0.019048	0.11993	0.62662	-0.67435	0.60952	0.82434	0.75838	-0.399
NEG	607.236	3.03	0.015152	0.15802	2.1086	1.0763	1	1	1.0547	0.076799	0.48485	0.73462	0.85888	-0.21947	0.25714	0.48091	2.6762	1.4202	0.35238	0.57325	1.2692	0.34388	0.25714	0.49172	2.5375	1.3434	0.25714	0.51611	3.1159	1.6397
NEG	561.231	3.04	0.015152	0.15802	1.9591	0.97018	1	1	0.92511	-0.1123	0.69913	0.86627	0.81948	-0.28722	0.25714	0.48091	2.3071	1.2061	0.47619	0.67517	1.1776	0.23588	0.25714	0.49172	2.4938	1.3184	0.25714	0.51611	2.8153	1.4933
NEG	980.176	0.36	0.025974	0.21331	0.69381	-0.52739	0.0021645	0.073593	0.51582	-0.95505	0.008658	0.05492	0.56321	-0.82826	0.11429	0.30644	0.63872	-0.64674	0.47619	0.67517	0.9206	-0.11935	0.47619	0.68896	1.2383	0.30831	0.91429	0.97692	1.1341	0.18152
NEG	594.481	7.59	0.025974	0.21331	0.59778	-0.7423	0.0021645	0.073593	4.2845	2.0991	0.93723	0.96622	3.0913	1.6282	0.0095238	0.060188	2.0336	1.024	0.0095238	0.077098	3.4018	1.7663	0.019048	0.11993	0.47463	-1.0751	1	1	0.65784	-0.6042
NEG	481.312	5.34	0.025974	0.21331	0.86107	-0.2158	0.015152	0.14803	0.83162	-0.266	0.0021645	0.025377	0.70158	-0.51133	0.0095238	0.060188	0.40639	-1.2991	0.066667	0.22266	0.47196	-1.0833	0.038095	0.17695	0.48867	-1.0331	0.25714	0.51611	0.57926	-0.78772
NEG	619.288	5.52	0.025974	0.21331	1.6063	0.68377	0.015152	0.14803	1.47	0.55584	0.015152	0.079011	1.6605	0.73164	0.019048	0.093317	1.9608	0.97146	0.91429	0.95707	1.2207	0.28769	0.91429	0.9666	1.3339	0.41562	0.91429	0.97692	1.1808	0.23982
NEG	189.004	2.15	0.025974	0.21331	0.48855	-1.0334	0.015152	0.14803	0.40357	-1.3091	0.39394	0.66372	0.70055	-0.51343	0.019048	0.093317	0.28032	-1.8348	0.25714	0.48625	0.57379	-0.80141	0.47619	0.68896	0.69461	-0.52573	0.11429	0.3578	0.40015	-1.3214
NEG	542.336	5.34	0.025974	0.21331	0.86543	-0.2085	0.025974	0.18553	0.83852	-0.25408	0.0021645	0.025377	0.68718	-0.54123	0.0095238	0.060188	0.38729	-1.3685	0.11429	0.31236	0.44751	-1.16	0.038095	0.17695	0.46187	-1.1144	0.25714	0.51611	0.56359	-0.82728
NEG	256.085	2.61	0.025974	0.21331	0.59279	-0.75441	0.025974	0.18553	0.52161	-0.93896	0.008658	0.05492	0.36756	-1.4439	0.038095	0.14719	0.43236	-1.2097	0.47619	0.67517	0.72937	-0.45528	0.60952	0.79159	0.8289	-0.27074	0.91429	0.97692	1.1763	0.23424
NEG	705.338	5.96	0.025974	0.21331	0.84003	-0.25149	0.025974	0.18553	0.80782	-0.3079	0.008658	0.05492	0.77455	-0.36857	0.0095238	0.060188	0.48661	-1.0391	0.0095238	0.077098	0.57928	-0.78766	0.038095	0.17695	0.60238	-0.73125	0.038095	0.18772	0.62826	-0.67058
NEG	255.085	2.62	0.025974	0.21331	0.60608	-0.72242	0.025974	0.18553	0.53261	-0.90884	0.015152	0.079011	0.3662	-1.4493	0.038095	0.14719	0.46531	-1.1037	0.47619	0.67517	0.76774	-0.3813	0.7619	0.88776	0.87364	-0.19488	0.7619	0.90703	1.2707	0.34558
NEG	789.585	9.11	0.025974	0.21331	0.65145	-0.61827	0.025974	0.18553	0.59612	-0.74633	0.39394	0.66372	0.82722	-0.27366	0.0095238	0.060188	0.33274	-1.5875	0.0095238	0.077098	0.51077	-0.96925	0.066667	0.25241	0.55818	-0.84119	0.019048	0.12901	0.40224	-1.3139
NEG	226.018	2.8	0.025974	0.21331	0.35857	-1.4797	0.041126	0.23619	0.36705	-1.4459	0.93723	0.96622	0.89578	-0.15878	0.0095238	0.060188	0.066002	-3.9213	0.019048	0.10445	0.18407	-2.4417	0.47619	0.68896	0.17982	-2.4754	0.019048	0.12901	0.073681	-3.7626
NEG	172.991	1.03	0.025974	0.21331	0.26359	-1.9236	0.064935	0.3041	0.48364	-1.048	0.0021645	0.025377	0.27248	-1.8758	0.0095238	0.060188	0.097013	-3.3657	0.7619	0.86812	0.36804	-1.4421	0.7619	0.88776	0.20059	-2.3177	0.066667	0.26984	0.35604	-1.4899
NEG	984.518	8.24	0.025974	0.21331	0.67114	-0.57532	0.064935	0.3041	0.75648	-0.40262	0.0021645	0.025377	0.65261	-0.6157	0.0095238	0.060188	0.49102	-1.0261	0.25714	0.48625	0.73163	-0.45082	0.11429	0.33848	0.64909	-0.62351	0.11429	0.3578	0.75239	-0.41044
NEG	1082.7	5.96	0.025974	0.21331	0.67841	-0.55977	0.093074	0.37317	0.75158	-0.41201	0.004329	0.037357	0.59383	-0.75187	0.038095	0.14719	0.33379	-1.583	0.17143	0.3965	0.49202	-1.0232	0.11429	0.33848	0.44413	-1.171	0.25714	0.51611	0.5621	-0.8311
NEG	134.895	0.4	0.025974	0.21331	1.2179	0.28436	0.093074	0.37317	1.2061	0.27034	0.041126	0.15468	1.1875	0.24789	0.60952	0.77559	1.1205	0.16411	0.91429	0.95707	0.92003	-0.12025	0.60952	0.79159	0.92901	-0.10623	0.91429	0.97692	0.94359	-0.083775
NEG	1043.61	5.11	0.025974	0.21331	1.8252	0.86802	0.093074	0.37317	0.71074	-0.4926	0.041126	0.15468	0.72354	-0.46686	0.0095238	0.060188	0.24474	-2.0307	0.0095238	0.077098	0.13409	-2.8987	0.0095238	0.10513	0.34435	-1.5381	0.0095238	0.088959	0.33826	-1.5638
NEG	510.268	3.9	0.025974	0.21331	2.5364	1.3428	0.093074	0.37317	1.6726	0.74213	0.24026	0.49508	1.3417	0.4241	0.019048	0.093317	5.6446	2.4969	0.25714	0.48625	2.2254	1.1541	0.038095	0.17695	3.3746	1.7547	0.0095238	0.088959	4.2069	2.0728
NEG	453.768	12.89	0.025974	0.21331	0.84354	-0.24547	0.093074	0.37317	0.9202	-0.11998	0.48485	0.73462	1.0881	0.12182	0.25714	0.48091	1.0578	0.081125	0.066667	0.22266	1.2541	0.3266	0.47619	0.68896	1.1496	0.20111	0.91429	0.97692	0.97219	-0.040691
NEG	594.377	6.09	0.025974	0.21331	0.61775	-0.69491	0.13203	0.45254	0.63273	-0.66033	0.004329	0.037357	0.52257	-0.93629	0.0095238	0.060188	0.19392	-2.3665	0.0095238	0.077098	0.31392	-1.6716	0.038095	0.17695	0.30648	-1.7061	0.019048	0.12901	0.37109	-1.4302
NEG	642.295	5.96	0.025974	0.21331	0.82833	-0.27171	0.13203	0.45254	0.88418	-0.1776	0.025974	0.11236	0.8378	-0.25532	0.0095238	0.060188	0.50516	-0.98519	0.019048	0.10445	0.60985	-0.71347	0.019048	0.11993	0.57133	-0.80759	0.0095238	0.088959	0.60296	-0.72987
NEG	513.296	3.76	0.025974	0.21331	3.3772	1.7558	0.13203	0.45254	1.5999	0.67794	0.30952	0.5757	1.3836	0.46843	0.066667	0.21465	2.4326	1.2825	0.47619	0.67517	0.72031	-0.47331	0.25714	0.49172	1.5205	0.60458	0.17143	0.44493	1.7582	0.8141
NEG	865.578	8.77	0.025974	0.21331	0.64144	-0.64062	0.13203	0.45254	0.79809	-0.32539	0.39394	0.66372	0.88627	-0.17418	0.7619	0.8687	0.98016	-0.028904	0.25714	0.48625	1.5281	0.61172	0.25714	0.49172	1.2281	0.29648	0.25714	0.51611	1.1059	0.14528
NEG	1161.72	5.96	0.025974	0.21331	0.76661	-0.38344	0.17965	0.5396	0.83336	-0.263	0.025974	0.11236	0.70408	-0.50618	0.0095238	0.060188	0.30979	-1.6907	0.019048	0.10445	0.4041	-1.3072	0.038095	0.17695	0.37173	-1.4277	0.038095	0.18772	0.43998	-1.1845
NEG	511.29	3.76	0.025974	0.21331	3.8672	1.9513	0.17965	0.5396	1.6103	0.68734	0.24026	0.49508	1.3413	0.42359	0.066667	0.21465	2.7197	1.4435	0.47619	0.67517	0.70327	-0.50784	0.25714	0.49172	1.6889	0.75611	0.11429	0.3578	2.0277	1.0199
NEG	579.276	3.76	0.025974	0.21331	3.7513	1.9074	0.24026	0.6051	1.7237	0.78552	0.17965	0.41666	1.4469	0.53301	0.066667	0.21465	2.8451	1.5085	0.91429	0.95707	0.75845	-0.39888	0.25714	0.49172	1.6506	0.72298	0.066667	0.26984	1.9663	0.97549
NEG	482.31	5.94	0.025974	0.21331	1.4803	0.56591	0.30952	0.67547	0.85491	-0.22616	0.004329	0.037357	0.72254	-0.46884	0.066667	0.21465	0.69261	-0.5299	0.0095238	0.077098	0.46787	-1.0958	0.60952	0.79159	0.81015	-0.30373	0.7619	0.90703	0.95856	-0.061052
NEG	662.364	6.09	0.025974	0.21331	0.64306	-0.63697	0.30952	0.67547	0.77692	-0.36416	0.025974	0.11236	0.7109	-0.49228	0.0095238	0.060188	0.30456	-1.7152	0.066667	0.22266	0.47361	-1.0782	0.038095	0.17695	0.39201	-1.3511	0.038095	0.18772	0.42841	-1.2229
NEG	580.278	3.76	0.025974	0.21331	2.8597	1.5159	0.30952	0.67547	1.3885	0.47348	0.17965	0.41666	1.2292	0.29775	0.066667	0.21465	2.242	1.1648	0.60952	0.77155	0.78401	-0.35106	0.17143	0.4122	1.6148	0.69133	0.17143	0.44493	1.824	0.86707
NEG	904.533	8.41	0.025974	0.21331	0.65428	-0.61201	0.30952	0.67547	0.7672	-0.38233	0.93723	0.96622	0.95463	-0.066983	0.91429	0.96003	0.95547	-0.065713	0.25714	0.48625	1.4603	0.5463	0.35238	0.58501	1.2454	0.31661	1	1	1.0009	0.00127
NEG	412.208	3.41	0.025974	0.21331	0.1818	-2.4596	0.39394	0.74	0.68535	-0.54509	0.041126	0.15468	0.26897	-1.8945	0.038095	0.14719	0.15873	-2.6553	0.7619	0.86812	0.87312	-0.19574	0.019048	0.11993	0.23161	-2.1102	0.35238	0.62271	0.59014	-0.76087
NEG	822.529	8.21	0.025974	0.21331	0.72895	-0.45612	0.39394	0.74	0.8896	-0.16877	0.064935	0.21107	0.7632	-0.38987	0.038095	0.14719	0.67383	-0.56953	0.7619	0.86812	0.9244	-0.11342	0.47619	0.68896	0.75746	-0.40077	0.47619	0.72996	0.88291	-0.17966
NEG	512.294	3.76	0.025974	0.21331	3.8441	1.9426	0.39394	0.74	1.5726	0.65314	0.24026	0.49508	1.2146	0.28052	0.066667	0.21465	2.7597	1.4645	0.60952	0.77155	0.7179	-0.47814	0.25714	0.49172	1.7549	0.81135	0.11429	0.3578	2.272	1.184
NEG	606.301	4.96	0.025974	0.21331	0.67618	-0.56453	0.48485	0.80492	0.83413	-0.26165	0.0021645	0.025377	0.48226	-1.0521	0.0095238	0.060188	0.15817	-2.6605	0.0095238	0.077098	0.23391	-2.096	0.0095238	0.10513	0.18962	-2.3988	0.0095238	0.088959	0.32796	-1.6084
NEG	817.578	9.1	0.025974	0.21331	0.67994	-0.55651	0.48485	0.80492	0.86592	-0.20769	0.008658	0.05492	0.66971	-0.5784	0.038095	0.14719	0.51737	-0.95074	0.35238	0.57325	0.7609	-0.39422	0.066667	0.25241	0.59748	-0.74305	0.47619	0.72996	0.77253	-0.37234
NEG	789.542	8.65	0.025974	0.21331	0.74294	-0.42869	0.58874	0.86881	0.92318	-0.11532	0.17965	0.41666	0.79061	-0.33896	0.019048	0.093317	0.51804	-0.94885	0.25714	0.48625	0.69729	-0.52017	0.066667	0.25241	0.56115	-0.83353	0.17143	0.44493	0.65525	-0.60989
NEG	521.271	5.31	0.025974	0.21331	1.5413	0.62414	0.58874	0.86881	1.1221	0.16614	0.58874	0.79245	1.0059	0.0085038	0.7619	0.8687	1.1229	0.16724	0.17143	0.3965	0.72855	-0.4569	0.91429	0.9666	1.0008	0.0011045	0.47619	0.72996	1.1163	0.15874
NEG	549.299	5.94	0.025974	0.21331	1.7125	0.77612	0.58874	0.86881	1.0926	0.1278	0.81818	0.92235	0.93342	-0.099401	0.25714	0.48091	0.85526	-0.22556	0.0095238	0.077098	0.49942	-1.0017	0.25714	0.49172	0.78276	-0.35336	0.91429	0.97692	0.91627	-0.12616
NEG	816.575	9.1	0.025974	0.21331	0.64788	-0.62621	0.69913	0.91075	0.85603	-0.22427	0.041126	0.15468	0.65922	-0.60117	0.11429	0.30644	0.51446	-0.95888	0.35238	0.57325	0.79407	-0.33267	0.17143	0.4122	0.60098	-0.73461	0.60952	0.82434	0.7804	-0.35771
NEG	207.102	3.76	0.025974	0.21331	0.90563	-0.14301	0.81818	0.95398	0.98281	-0.025019	0.58874	0.79245	0.98152	-0.026909	0.066667	0.21465	0.91815	-0.1232	1	1	1.0138	0.019806	0.066667	0.25241	0.93421	-0.098183	0.038095	0.18772	0.93543	-0.096293
NEG	949.615	5.33	0.025974	0.21331	1.441	0.52706	0.93723	0.98595	1.0466	0.065661	0.015152	0.079011	0.62617	-0.67537	0.038095	0.14719	0.44848	-1.1569	0.0095238	0.077098	0.31123	-1.6839	0.038095	0.17695	0.42853	-1.2225	0.17143	0.44493	0.71623	-0.48151
NEG	520.264	5.31	0.025974	0.21331	1.6556	0.72734	0.93723	0.98595	1.0316	0.044923	0.064935	0.21107	0.74792	-0.41904	0.91429	0.96003	0.89435	-0.16108	0.11429	0.31236	0.54021	-0.88842	0.60952	0.79159	0.86693	-0.20601	0.47619	0.72996	1.1958	0.25796
NEG	609.251	3.03	0.025974	0.21331	1.8984	0.92475	0.93723	0.98595	0.86069	-0.21643	0.30952	0.5757	0.65099	-0.61929	0.17143	0.38396	1.8144	0.8595	0.7619	0.86812	0.95578	-0.065247	0.11429	0.33848	2.1081	1.0759	0.17143	0.44493	2.7872	1.4788
NEG	221.113	3.73	0.025974	0.21331	0.87005	-0.20084	0.93723	0.98595	1.0025	0.0036251	0.69913	0.86627	1.027	0.038409	0.7619	0.8687	1.0294	0.041847	0.038095	0.15643	1.1832	0.24268	0.47619	0.68896	1.0268	0.038222	0.7619	0.90703	1.0024	0.0034379
NEG	606.408	7.91	0.025974	0.21331	1.9794	0.98505	1	1	1.0458	0.064665	0.0021645	0.025377	0.5467	-0.87118	0.35238	0.57216	0.80236	-0.31768	0.019048	0.10445	0.40536	-1.3027	0.7619	0.88776	0.76719	-0.38234	0.25714	0.51611	1.4676	0.5535
NEG	152.886	0.32	0.041126	0.26994	1.3415	0.42386	0.0021645	0.073593	1.7107	0.77462	0.0021645	0.025377	1.6868	0.75431	0.47619	0.67913	0.8535	-0.22853	0.038095	0.15643	0.63622	-0.65239	0.0095238	0.10513	0.49891	-1.0032	0.0095238	0.088959	0.50598	-0.98284
NEG	696.43	6.76	0.041126	0.26994	0.6948	-0.52533	0.0021645	0.073593	0.39296	-1.3476	0.0021645	0.025377	0.28392	-1.8164	0.0095238	0.060188	0.047854	-4.3852	0.0095238	0.077098	0.068874	-3.8599	0.0095238	0.10513	0.12178	-3.0377	0.0095238	0.088959	0.16855	-2.5688
NEG	530.898	0.33	0.041126	0.26994	1.2429	0.31371	0.0021645	0.073593	1.4005	0.48595	0.008658	0.05492	1.3104	0.39006	0.47619	0.67913	0.89872	-0.15406	0.11429	0.31236	0.72308	-0.46777	0.038095	0.17695	0.64171	-0.64001	0.038095	0.18772	0.68581	-0.54412
NEG	782.717	0.33	0.041126	0.26994	1.2843	0.36097	0.008658	0.1141	1.3513	0.43434	0.041126	0.15468	1.3274	0.40862	0.35238	0.57216	0.82562	-0.27645	0.019048	0.10445	0.64286	-0.63742	0.0095238	0.10513	0.61098	-0.7108	0.066667	0.26984	0.62198	-0.68507
NEG	841.578	8.98	0.041126	0.26994	0.75879	-0.39823	0.008658	0.1141	0.77055	-0.37604	0.58874	0.79245	0.93678	-0.094222	0.35238	0.57216	0.90071	-0.15086	0.11429	0.31236	1.187	0.24736	0.35238	0.58501	1.1689	0.22517	0.91429	0.97692	0.9615	-0.056639
NEG	507.327	5.5	0.041126	0.26994	0.82543	-0.27678	0.015152	0.14803	0.66026	-0.5989	0.0021645	0.025377	0.52466	-0.93053	0.0095238	0.060188	0.15278	-2.7105	0.0095238	0.077098	0.18509	-2.4337	0.019048	0.11993	0.2314	-2.1116	0.0095238	0.088959	0.2912	-1.7799
NEG	414.987	0.35	0.041126	0.26994	1.1467	0.19755	0.015152	0.14803	1.1664	0.22206	0.008658	0.05492	1.1958	0.258	0.11429	0.30644	0.81169	-0.301	0.0095238	0.077098	0.70782	-0.49854	0.0095238	0.10513	0.6959	-0.52305	0.0095238	0.088959	0.67877	-0.559
NEG	257.175	4.15	0.041126	0.26994	0.47567	-1.072	0.015152	0.14803	0.51781	-0.94951	0.13203	0.34269	0.62484	-0.67844	0.0095238	0.060188	0.22142	-2.1752	0.019048	0.10445	0.46548	-1.1032	0.0095238	0.10513	0.42761	-1.2256	0.0095238	0.088959	0.35436	-1.4967
NEG	543.338	5.34	0.041126	0.26994	0.84592	-0.24142	0.025974	0.18553	0.82878	-0.27093	0.0021645	0.025377	0.6667	-0.58488	0.0095238	0.060188	0.36921	-1.4375	0.019048	0.10445	0.43647	-1.1961	0.038095	0.17695	0.44549	-1.1665	0.17143	0.44493	0.55379	-0.85259
NEG	1035.66	5.34	0.041126	0.26994	0.8267	-0.27457	0.025974	0.18553	0.77695	-0.3641	0.0021645	0.025377	0.58022	-0.78534	0.019048	0.093317	0.27272	-1.8745	0.038095	0.15643	0.32989	-1.5999	0.066667	0.25241	0.35101	-1.5104	0.25714	0.51611	0.47003	-1.0892
NEG	211.093	2.62	0.041126	0.26994	0.62359	-0.68133	0.025974	0.18553	0.53972	-0.88973	0.015152	0.079011	0.37164	-1.428	0.038095	0.14719	0.45862	-1.1246	0.35238	0.57325	0.73544	-0.44331	0.7619	0.88776	0.84974	-0.23491	0.91429	0.97692	1.234	0.3034
NEG	502.289	4.84	0.041126	0.26994	0.59659	-0.74519	0.041126	0.23619	0.60459	-0.72597	0.0021645	0.025377	0.30866	-1.6959	0.0095238	0.060188	0.12509	-2.999	0.0095238	0.077098	0.20967	-2.2538	0.019048	0.11993	0.2069	-2.273	0.0095238	0.088959	0.40527	-1.3031
NEG	1105.65	5.34	0.041126	0.26994	0.78418	-0.35075	0.041126	0.23619	0.82803	-0.27225	0.17965	0.41666	0.78999	-0.3401	0.11429	0.30644	0.39509	-1.3398	0.17143	0.3965	0.50382	-0.98901	0.17143	0.4122	0.47714	-1.0675	0.11429	0.3578	0.50012	-0.99966
NEG	188.009	2.15	0.041126	0.26994	0.45539	-1.1348	0.041126	0.23619	0.39457	-1.3416	0.48485	0.73462	0.65824	-0.60331	0.019048	0.093317	0.28103	-1.8312	0.25714	0.48625	0.61711	-0.69641	0.47619	0.68896	0.71222	-0.4896	0.17143	0.44493	0.42693	-1.2279
NEG	1081.7	5.96	0.041126	0.26994	0.70079	-0.51294	0.064935	0.3041	0.71685	-0.48026	0.0021645	0.025377	0.58689	-0.76883	0.0095238	0.060188	0.25008	-1.9995	0.019048	0.10445	0.35685	-1.4866	0.019048	0.11993	0.34886	-1.5193	0.038095	0.18772	0.42611	-1.2307
NEG	194.091	3.79	0.041126	0.26994	1.208	0.27266	0.064935	0.3041	1.1579	0.21146	0.015152	0.079011	1.2806	0.35678	0.11429	0.30644	1.2354	0.30498	0.60952	0.77155	1.0227	0.03233	0.47619	0.68896	1.067	0.093524	0.7619	0.90703	0.96473	-0.0518
NEG	89.0246	0.39	0.041126	0.26994	0.54986	-0.86287	0.064935	0.3041	0.63089	-0.66455	0.24026	0.49508	0.77088	-0.37543	0.066667	0.21465	0.60875	-0.71608	1	1	1.1071	0.14679	0.91429	0.9666	0.96492	-0.051526	0.17143	0.44493	0.78969	-0.34065
NEG	187.007	2.15	0.041126	0.26994	0.47719	-1.0674	0.064935	0.3041	0.40514	-1.3035	0.48485	0.73462	0.66628	-0.58579	0.019048	0.093317	0.28034	-1.8347	0.17143	0.3965	0.58748	-0.76738	0.47619	0.68896	0.69196	-0.53125	0.17143	0.44493	0.42076	-1.2489
NEG	525.339	5.51	0.041126	0.26994	0.75024	-0.41457	0.093074	0.37317	0.75704	-0.40156	0.025974	0.11236	0.64606	-0.63025	0.17143	0.38396	0.45297	-1.1425	0.25714	0.48625	0.60377	-0.72792	0.35238	0.58501	0.59835	-0.74094	0.25714	0.51611	0.70113	-0.51224
NEG	107.048	2.15	0.041126	0.26994	0.45723	-1.129	0.093074	0.37317	0.41872	-1.256	0.48485	0.73462	0.66773	-0.58267	0.038095	0.14719	0.3147	-1.668	0.35238	0.57325	0.68827	-0.53895	0.7619	0.88776	0.75158	-0.412	0.25714	0.51611	0.4713	-1.0853
NEG	621.301	5.88	0.041126	0.26994	1.5328	0.61621	0.093074	0.37317	1.4589	0.54485	0.81818	0.92235	1.2419	0.31256	0.91429	0.96003	1.7207	0.78297	0.47619	0.67517	1.1225	0.16676	0.47619	0.68896	1.1795	0.23812	1	1	1.3855	0.47041
NEG	553.228	3.07	0.041126	0.26994	1.7527	0.80959	0.093074	0.37317	1.3835	0.46836	0.93723	0.96622	0.77728	-0.3635	0.25714	0.48091	1.5073	0.59195	0.35238	0.57325	0.85997	-0.21764	0.60952	0.79159	1.0894	0.12359	0.25714	0.51611	1.9392	0.95545
NEG	1004.68	5.95	0.041126	0.26994	1.3806	0.46531	0.13203	0.45254	0.77883	-0.36062	0.0021645	0.025377	0.67128	-0.57502	0.038095	0.14719	0.36632	-1.4488	0.0095238	0.077098	0.26533	-1.9141	0.17143	0.4122	0.47035	-1.0882	0.25714	0.51611	0.54571	-0.87379
NEG	887.559	12.19	0.041126	0.26994	0.63501	-0.65515	0.13203	0.45254	0.74926	-0.41646	1	1	1.0127	0.018161	1	1	1.0823	0.11416	0.066667	0.22266	1.7045	0.76931	0.25714	0.49172	1.4445	0.53062	1	1	1.0688	0.095997
NEG	188.986	0.8	0.041126	0.26994	0.44103	-1.181	0.17965	0.5396	0.62845	-0.67012	0.004329	0.037357	0.29801	-1.7465	0.0095238	0.060188	0.098248	-3.3474	0.11429	0.31236	0.22277	-2.1664	0.066667	0.25241	0.15633	-2.6773	0.038095	0.18772	0.32968	-1.6009
NEG	1188.8	12.04	0.041126	0.26994	1.1091	0.14945	0.17965	0.5396	1.1188	0.162	0.24026	0.49508	1.1205	0.16411	0.7619	0.8687	1.0573	0.080326	0.7619	0.86812	0.95322	-0.06912	0.7619	0.88776	0.94496	-0.081678	0.7619	0.90703	0.94358	-0.083784
NEG	211.133	3.28	0.041126	0.26994	0.38914	-1.3616	0.17965	0.5396	0.71614	-0.48168	0.93723	0.96622	0.83784	-0.25526	0.0095238	0.060188	0.14987	-2.7382	0.35238	0.57325	0.38512	-1.3766	0.038095	0.17695	0.20927	-2.2566	0.0095238	0.088959	0.17887	-2.483
NEG	867.581	8.6	0.041126	0.26994	0.76417	-0.38803	0.24026	0.6051	0.8032	-0.31616	0.015152	0.079011	0.68701	-0.54159	0.038095	0.14719	0.7705	-0.37613	0.91429	0.95707	1.0083	0.011893	1	1	0.95928	-0.059972	0.17143	0.44493	1.1215	0.16545
NEG	873.565	9.29	0.041126	0.26994	1.2475	0.31905	0.24026	0.6051	1.1848	0.24459	0.30952	0.5757	1.1477	0.19876	0.60952	0.77559	1.2055	0.2696	0.7619	0.86812	0.9663	-0.049455	0.91429	0.9666	1.0175	0.025014	0.91429	0.97692	1.0503	0.070843
NEG	856.515	8.67	0.041126	0.26994	0.7687	-0.37952	0.24026	0.6051	0.91001	-0.13605	0.93723	0.96622	0.90602	-0.14239	0.25714	0.48091	0.65343	-0.6139	0.60952	0.77155	0.85004	-0.23439	0.35238	0.58501	0.71804	-0.47786	0.35238	0.62271	0.72121	-0.47152
NEG	538.314	4.97	0.041126	0.26994	0.61689	-0.69692	0.30952	0.67547	0.75539	-0.4047	0.0021645	0.025377	0.43643	-1.1962	0.0095238	0.060188	0.10766	-3.2154	0.0095238	0.077098	0.17453	-2.5185	0.0095238	0.10513	0.14253	-2.8107	0.0095238	0.088959	0.24669	-2.0192
NEG	673.393	7.91	0.041126	0.26994	1.8719	0.90452	0.30952	0.67547	0.88441	-0.17721	0.0021645	0.025377	0.56391	-0.82646	0.35238	0.57216	0.80441	-0.31399	0.066667	0.22266	0.42973	-1.2185	1	1	0.90955	-0.13678	0.25714	0.51611	1.4265	0.51247
NEG	611.197	3.79	0.041126	0.26994	2.1185	1.0831	0.30952	0.67547	1.4935	0.57865	0.041126	0.15468	1.674	0.7433	0.038095	0.14719	2.2037	1.1399	0.91429	0.95707	1.0402	0.05685	0.17143	0.4122	1.4756	0.56126	0.47619	0.72996	1.3164	0.39662
NEG	368.16	3.59	0.041126	0.26994	0.44648	-1.1633	0.30952	0.67547	1.2991	0.37753	0.13203	0.34269	0.80754	-0.30839	0.25714	0.48091	3.2564	1.7033	0.066667	0.22266	7.2935	2.8666	0.17143	0.4122	2.5067	1.3258	0.11429	0.3578	4.0325	2.0117
NEG	435.144	3.59	0.041126	0.26994	0.43923	-1.1869	0.30952	0.67547	1.2328	0.30193	0.24026	0.49508	0.8164	-0.29265	0.47619	0.67913	2.8356	1.5037	0.066667	0.22266	6.4558	2.6906	0.11429	0.33848	2.3001	1.2017	0.11429	0.3578	3.4733	1.7963
NEG	367.158	3.59	0.041126	0.26994	0.42436	-1.2366	0.30952	0.67547	1.3097	0.38919	0.39394	0.66372	0.833	-0.26361	0.25714	0.48091	3.234	1.6933	0.038095	0.15643	7.6208	2.93	0.17143	0.4122	2.4694	1.3041	0.11429	0.3578	3.8823	1.9569
NEG	263.165	4.52	0.041126	0.26994	0.89845	-0.15449	0.30952	0.67547	0.937	-0.093882	0.58874	0.79245	0.96088	-0.057574	0.91429	0.96003	0.98775	-0.017784	0.35238	0.57325	1.0994	0.13671	0.91429	0.9666	1.0542	0.076098	0.91429	0.97692	1.028	0.039789
NEG	642.258	5.34	0.041126	0.26994	0.86928	-0.20211	0.39394	0.74	1.0349	0.049467	0.24026	0.49508	0.92724	-0.10899	0.038095	0.14719	0.63576	-0.65344	0.11429	0.31236	0.73137	-0.45133	0.0095238	0.10513	0.61433	-0.7029	0.066667	0.26984	0.68566	-0.54445
NEG	885.548	12.16	0.041126	0.26994	0.54302	-0.88092	0.39394	0.74	0.74553	-0.42365	0.69913	0.86627	1.1474	0.19841	0.91429	0.96003	1.2807	0.35693	0.019048	0.10445	2.3585	1.2379	0.17143	0.4122	1.7178	0.78059	0.60952	0.82434	1.1161	0.15852
NEG	953.536	12.14	0.041126	0.26994	0.62546	-0.67702	0.48485	0.80492	0.85144	-0.23203	0.48485	0.73462	1.1621	0.21668	0.91429	0.96003	1.2459	0.31717	0.038095	0.15643	1.992	0.99419	0.25714	0.49172	1.4633	0.5492	0.60952	0.82434	1.0721	0.10049
NEG	125.094	2.75	0.041126	0.26994	0.83518	-0.25984	0.58874	0.86881	1.0771	0.1072	0.004329	0.037357	0.75987	-0.39617	0.35238	0.57216	0.89289	-0.16344	0.7619	0.86812	1.0691	0.096399	0.35238	0.58501	0.82895	-0.27064	1	1	1.1751	0.23273
NEG	688.261	5.32	0.041126	0.26994	0.84776	-0.23828	0.58874	0.86881	0.94629	-0.079642	0.015152	0.079011	0.80641	-0.31041	0.019048	0.093317	0.54396	-0.87844	0.17143	0.3965	0.64164	-0.64016	0.038095	0.17695	0.57483	-0.7988	0.11429	0.3578	0.67454	-0.56803
NEG	178.051	1.73	0.041126	0.26994	0.43153	-1.2125	0.69913	0.91075	0.85096	-0.23284	0.81818	0.92235	0.92252	-0.11634	0.038095	0.14719	0.27417	-1.8669	0.60952	0.77155	0.63533	-0.65441	0.038095	0.17695	0.32218	-1.634	0.038095	0.18772	0.29719	-1.7505
NEG	179.055	1.72	0.041126	0.26994	0.40622	-1.2997	0.69913	0.91075	0.83912	-0.25305	0.93723	0.96622	0.90404	-0.14555	0.038095	0.14719	0.3101	-1.6892	0.47619	0.67517	0.76337	-0.38955	0.11429	0.33848	0.36955	-1.4362	0.066667	0.26984	0.34301	-1.5437
NEG	771.573	9.37	0.041126	0.26994	0.79863	-0.32441	0.81818	0.95398	0.95388	-0.068121	0.008658	0.05492	0.79109	-0.33809	0.25714	0.48091	0.72899	-0.45604	0.47619	0.67517	0.9128	-0.13163	0.35238	0.58501	0.76423	-0.38791	0.25714	0.51611	0.9215	-0.11795
NEG	708.278	5.95	0.041126	0.26994	0.78159	-0.35552	0.81818	0.95398	0.96553	-0.050614	0.093074	0.26863	0.82696	-0.27411	0.0095238	0.060188	0.48155	-1.0542	0.019048	0.10445	0.61612	-0.69873	0.019048	0.11993	0.49874	-1.0036	0.019048	0.12901	0.58231	-0.78013
NEG	608.847	0.33	0.041126	0.26994	1.0905	0.12495	0.81818	0.95398	0.99319	-0.0098618	0.17965	0.41666	1.0981	0.13507	0.0095238	0.060188	0.68486	-0.54612	0.0095238	0.077098	0.62804	-0.67107	0.0095238	0.10513	0.68956	-0.53626	0.0095238	0.088959	0.62365	-0.68119
NEG	266.886	3.62	0.041126	0.26994	0.71086	-0.49235	0.93723	0.98595	1.0149	0.021357	0.48485	0.73462	0.84727	-0.23911	0.066667	0.21465	0.73924	-0.43588	1	1	1.0399	0.056473	0.0095238	0.10513	0.72838	-0.45724	0.7619	0.90703	0.8725	-0.19677
NEG	246.036	1.73	0.041126	0.26994	0.46	-1.1203	0.93723	0.98595	0.90327	-0.14677	0.69913	0.86627	0.93932	-0.090312	0.038095	0.14719	0.31161	-1.6822	0.60952	0.77155	0.67742	-0.56188	0.038095	0.17695	0.34498	-1.5354	0.038095	0.18772	0.33174	-1.5919
NEG	134.061	1.73	0.041126	0.26994	0.42171	-1.2457	0.93723	0.98595	0.90932	-0.13713	0.81818	0.92235	0.90618	-0.14212	0.038095	0.14719	0.30961	-1.6915	0.7619	0.86812	0.73418	-0.4458	0.11429	0.33848	0.34048	-1.5544	0.038095	0.18772	0.34166	-1.5494
NEG	607.404	7.9	0.041126	0.26994	1.4307	0.51671	1	1	1.092	0.12703	0.015152	0.079011	0.68058	-0.55516	0.35238	0.57216	0.81265	-0.29929	0.17143	0.3965	0.56802	-0.816	0.25714	0.49172	0.74416	-0.42631	0.91429	0.97692	1.1941	0.25588
NEG	786.563	9.02	0.041126	0.26994	0.75234	-0.41054	1	1	0.93819	-0.092043	0.39394	0.66372	0.92856	-0.10694	0.019048	0.093317	0.63646	-0.65186	0.35238	0.57325	0.84597	-0.24131	0.11429	0.33848	0.67839	-0.55981	0.019048	0.12901	0.68543	-0.54492
NEG	157.077	0.39	0.064935	0.35156	0.8093	-0.30525	0.0021645	0.073593	0.62728	-0.67282	0.0021645	0.025377	0.66709	-0.58405	0.7619	0.8687	0.88932	-0.16922	0.60952	0.77155	1.0989	0.13603	0.25714	0.49172	1.4177	0.5036	0.25714	0.51611	1.3331	0.41483
NEG	693.411	6.78	0.064935	0.35156	0.64406	-0.63472	0.0021645	0.073593	0.39958	-1.3234	0.0021645	0.025377	0.39803	-1.3291	0.0095238	0.060188	0.073995	-3.7564	0.0095238	0.077098	0.11489	-3.1217	0.0095238	0.10513	0.18518	-2.433	0.0095238	0.088959	0.1859	-2.4274
NEG	942.211	0.36	0.064935	0.35156	0.78276	-0.35336	0.0021645	0.073593	0.58333	-0.77762	0.004329	0.037357	0.59586	-0.74697	0.35238	0.57216	0.81817	-0.28953	0.91429	0.95707	1.0452	0.063836	0.038095	0.17695	1.4026	0.48809	0.11429	0.3578	1.3731	0.45744
NEG	165.054	2.3	0.064935	0.35156	1.0581	0.081419	0.008658	0.1141	0.54581	-0.87353	0.008658	0.05492	0.65332	-0.61414	0.0095238	0.060188	0.37274	-1.4238	0.60952	0.77155	0.35228	-1.5052	0.25714	0.49172	0.6829	-0.55024	0.0095238	0.088959	0.57053	-0.80963
NEG	964.194	0.36	0.064935	0.35156	0.77655	-0.36484	0.008658	0.1141	0.66796	-0.58217	0.025974	0.11236	0.74146	-0.43156	0.038095	0.14719	0.70365	-0.50707	0.60952	0.77155	0.90612	-0.14222	0.47619	0.68896	1.0534	0.075105	0.91429	0.97692	0.94901	-0.075512
NEG	630.301	4.86	0.064935	0.35156	0.60712	-0.71995	0.015152	0.14803	0.57041	-0.80994	0.0021645	0.025377	0.38148	-1.3903	0.0095238	0.060188	0.1422	-2.814	0.0095238	0.077098	0.23422	-2.094	0.0095238	0.10513	0.2493	-2.0041	0.0095238	0.088959	0.37277	-1.4237
NEG	284.776	0.33	0.064935	0.35156	1.2084	0.27315	0.015152	0.14803	1.2209	0.2879	0.064935	0.21107	1.1992	0.26204	0.038095	0.14719	0.63059	-0.66523	0.0095238	0.077098	0.52182	-0.93838	0.0095238	0.10513	0.51651	-0.95313	0.0095238	0.088959	0.52585	-0.92728
NEG	593.364	5.66	0.064935	0.35156	0.65941	-0.60075	0.025974	0.18553	0.54206	-0.88347	0.0021645	0.025377	0.38903	-1.3621	0.0095238	0.060188	0.1694	-2.5615	0.0095238	0.077098	0.25689	-1.9608	0.019048	0.11993	0.31251	-1.678	0.038095	0.18772	0.43544	-1.1994
NEG	480.309	5.34	0.064935	0.35156	0.8667	-0.2064	0.041126	0.23619	0.85026	-0.23403	0.0021645	0.025377	0.70564	-0.50299	0.019048	0.093317	0.40284	-1.3117	0.066667	0.22266	0.4648	-1.1053	0.038095	0.17695	0.47378	-1.0777	0.25714	0.51611	0.57088	-0.80874
NEG	540.33	5.34	0.064935	0.35156	0.87353	-0.19507	0.041126	0.23619	0.84918	-0.23586	0.0021645	0.025377	0.71585	-0.48227	0.0095238	0.060188	0.4058	-1.3012	0.066667	0.22266	0.46455	-1.1061	0.066667	0.25241	0.47787	-1.0653	0.25714	0.51611	0.56688	-0.81889
NEG	592.361	5.66	0.064935	0.35156	0.66852	-0.58097	0.041126	0.23619	0.59243	-0.75529	0.0021645	0.025377	0.40363	-1.3089	0.0095238	0.060188	0.11712	-3.094	0.0095238	0.077098	0.17519	-2.513	0.019048	0.11993	0.19769	-2.3387	0.0095238	0.088959	0.29015	-1.7851
NEG	1103.65	5.34	0.064935	0.35156	0.85408	-0.22755	0.041126	0.23619	0.82472	-0.27802	0.0021645	0.025377	0.69843	-0.51782	0.0095238	0.060188	0.3526	-1.5039	0.066667	0.22266	0.41284	-1.2763	0.038095	0.17695	0.42754	-1.2259	0.25714	0.51611	0.50485	-0.98606
NEG	1025.63	5.34	0.064935	0.35156	0.84311	-0.24621	0.041126	0.23619	0.85746	-0.22186	0.004329	0.037357	0.657	-0.60604	0.066667	0.21465	0.40357	-1.3091	0.25714	0.48625	0.47867	-1.0629	0.25714	0.49172	0.47066	-1.0872	0.25714	0.51611	0.61427	-0.70306
NEG	277.067	2.62	0.064935	0.35156	0.67404	-0.5691	0.041126	0.23619	0.59	-0.76121	0.015152	0.079011	0.428	-1.2243	0.066667	0.21465	0.50741	-0.97878	0.47619	0.67517	0.75279	-0.40968	0.7619	0.88776	0.86001	-0.21757	1	1	1.1855	0.24552
NEG	628.319	5.96	0.064935	0.35156	0.76047	-0.39504	0.041126	0.23619	0.73743	-0.43943	0.064935	0.21107	0.74614	-0.42249	0.019048	0.093317	0.49746	-1.0073	0.17143	0.3965	0.65415	-0.6123	0.17143	0.4122	0.67459	-0.56791	0.11429	0.3578	0.66672	-0.58486
NEG	201.064	0.4	0.064935	0.35156	0.65939	-0.60079	0.041126	0.23619	0.60089	-0.73482	0.093074	0.26863	0.70199	-0.51049	1	1	0.95154	-0.071657	0.25714	0.48625	1.4431	0.52913	0.17143	0.4122	1.5835	0.66316	0.35238	0.62271	1.3555	0.43883
NEG	431.312	4.9	0.064935	0.35156	0.7504	-0.41426	0.041126	0.23619	0.75666	-0.40229	0.58874	0.79245	0.92383	-0.1143	0.35238	0.57216	1.2596	0.33294	0.038095	0.15643	1.6785	0.7472	0.11429	0.33848	1.6647	0.73523	0.35238	0.62271	1.3634	0.44724
NEG	243.919	0.27	0.064935	0.35156	1.1216	0.1655	0.064935	0.3041	1.1582	0.21193	0.0021645	0.025377	1.2945	0.37236	0.11429	0.30644	1.1267	0.17209	1	1	1.0046	0.0065916	0.91429	0.9666	0.97276	-0.039846	0.066667	0.26984	0.87039	-0.20027
NEG	1036.67	5.34	0.064935	0.35156	0.81846	-0.28901	0.064935	0.3041	0.75302	-0.40923	0.0021645	0.025377	0.57278	-0.80395	0.038095	0.14719	0.27583	-1.8581	0.11429	0.31236	0.33702	-1.5691	0.066667	0.25241	0.3663	-1.4489	0.25714	0.51611	0.48157	-1.0542
NEG	716.842	12.05	0.064935	0.35156	1.0873	0.12074	0.064935	0.3041	1.1711	0.22785	0.13203	0.34269	1.0609	0.085334	0.17143	0.38396	1.0981	0.13497	1	1	1.0099	0.014234	0.47619	0.68896	0.93765	-0.092884	0.7619	0.90703	1.035	0.049636
NEG	864.577	8.78	0.064935	0.35156	0.68161	-0.55297	0.064935	0.3041	0.6358	-0.65334	0.58874	0.79245	0.89218	-0.1646	1	1	0.91567	-0.1271	0.60952	0.77155	1.3434	0.42587	0.35238	0.58501	1.4402	0.52624	0.60952	0.82434	1.0263	0.037492
NEG	991.567	9.19	0.064935	0.35156	1.23	0.2987	0.093074	0.37317	1.3174	0.39767	0.0021645	0.025377	1.5754	0.6557	0.0095238	0.060188	1.6566	0.72819	0.11429	0.31236	1.3468	0.4295	0.17143	0.4122	1.2575	0.33052	0.91429	0.97692	1.0515	0.072495
NEG	703.321	5.5	0.064935	0.35156	0.84312	-0.24618	0.093074	0.37317	0.8137	-0.29743	0.008658	0.05492	0.76324	-0.38979	0.0095238	0.060188	0.3371	-1.5688	0.0095238	0.077098	0.39982	-1.3226	0.019048	0.11993	0.41428	-1.2713	0.0095238	0.088959	0.44167	-1.179
NEG	328.947	2.69	0.064935	0.35156	1.1245	0.16932	0.093074	0.37317	1.1536	0.20613	0.064935	0.21107	1.142	0.19154	0.11429	0.30644	1.1308	0.17733	1	1	1.0056	0.0080127	0.91429	0.9666	0.98024	-0.0288	0.91429	0.97692	0.9902	-0.014207
NEG	332.912	0.29	0.064935	0.35156	0.8079	-0.30775	0.13203	0.45254	0.84423	-0.24429	0.24026	0.49508	0.89837	-0.15462	0.019048	0.093317	0.54102	-0.88625	0.019048	0.10445	0.66966	-0.5785	0.0095238	0.10513	0.64084	-0.64197	0.0095238	0.088959	0.60222	-0.73164
NEG	478.293	5.47	0.064935	0.35156	1.4361	0.52212	0.17965	0.5396	0.78508	-0.34909	0.025974	0.11236	0.56402	-0.82618	0.0095238	0.060188	0.19715	-2.3427	0.0095238	0.077098	0.13728	-2.8648	0.0095238	0.10513	0.25112	-1.9936	0.0095238	0.088959	0.34954	-1.5165
NEG	720.76	0.32	0.064935	0.35156	1.1753	0.23299	0.17965	0.5396	1.1433	0.1932	0.13203	0.34269	1.175	0.23267	1	1	1.0203	0.029046	0.47619	0.67517	0.86818	-0.20394	0.60952	0.79159	0.89245	-0.16415	0.35238	0.62271	0.86837	-0.20362
NEG	895.835	12.03	0.064935	0.35156	1.1974	0.25996	0.17965	0.5396	1.1444	0.19457	0.58874	0.79245	1.0911	0.12575	0.17143	0.38396	1.202	0.26541	0.91429	0.95707	1.0038	0.0054507	0.7619	0.88776	1.0503	0.070842	0.17143	0.44493	1.1016	0.13966
NEG	444.891	12.07	0.064935	0.35156	1.0837	0.116	0.24026	0.6051	1.0796	0.11044	0.004329	0.037357	1.1788	0.23735	0.25714	0.48091	1.0745	0.10366	0.17143	0.3965	0.99148	-0.012344	0.60952	0.79159	0.99531	-0.006779	0.019048	0.12901	0.9115	-0.13369
NEG	403.945	0.42	0.064935	0.35156	0.91646	-0.12586	0.24026	0.6051	1.1119	0.15302	0.008658	0.05492	1.2041	0.26799	0.91429	0.96003	0.98485	-0.022029	0.47619	0.67517	1.0746	0.10383	0.17143	0.4122	0.88573	-0.17505	0.038095	0.18772	0.81789	-0.29002
NEG	490.836	12.13	0.064935	0.35156	0.91403	-0.12969	0.24026	0.6051	0.93232	-0.1011	1	1	1.0018	0.0026062	0.7619	0.8687	1.028	0.039872	0.17143	0.3965	1.1247	0.16956	0.25714	0.49172	1.1026	0.14097	1	1	1.0262	0.037266
NEG	539.317	4.97	0.064935	0.35156	0.63524	-0.65463	0.30952	0.67547	0.75858	-0.39863	0.004329	0.037357	0.43423	-1.2035	0.0095238	0.060188	0.1335	-2.9051	0.0095238	0.077098	0.21016	-2.2504	0.0095238	0.10513	0.17599	-2.5064	0.0095238	0.088959	0.30744	-1.7016
NEG	321.043	2.79	0.064935	0.35156	0.34065	-1.5536	0.30952	0.67547	0.54394	-0.87847	0.69913	0.86627	0.80189	-0.31852	0.0095238	0.060188	0.039696	-4.6549	0.038095	0.15643	0.11653	-3.1012	0.0095238	0.10513	0.072978	-3.7764	0.066667	0.26984	0.049503	-4.3363
NEG	834.563	8.71	0.064935	0.35156	0.64483	-0.63301	0.39394	0.74	0.7038	-0.50676	0.064935	0.21107	0.63122	-0.66378	0.60952	0.77559	0.69549	-0.52391	0.60952	0.77155	1.0786	0.1091	0.91429	0.9666	0.98819	-0.017146	0.60952	0.82434	1.1018	0.13988
NEG	88.0328	0.35	0.064935	0.35156	0.84371	-0.24518	0.39394	0.74	0.85789	-0.22113	0.093074	0.26863	0.88036	-0.18384	0.17143	0.38396	1.2427	0.31342	0.019048	0.10445	1.4728	0.5586	0.038095	0.17695	1.4485	0.53455	0.17143	0.44493	1.4115	0.49726
NEG	814.556	8.68	0.064935	0.35156	0.73279	-0.44854	0.39394	0.74	0.84417	-0.2444	0.13203	0.34269	0.64561	-0.63126	0.0095238	0.060188	0.32074	-1.6405	0.0095238	0.077098	0.4377	-1.192	0.038095	0.17695	0.37995	-1.3961	0.25714	0.51611	0.49679	-1.0093
NEG	886.552	12.16	0.064935	0.35156	0.60652	-0.72138	0.39394	0.74	0.81022	-0.30361	0.30952	0.5757	1.2116	0.27694	0.7619	0.8687	1.2554	0.32817	0.038095	0.15643	2.0699	1.0495	0.17143	0.4122	1.5495	0.63178	0.7619	0.90703	1.0361	0.051228
NEG	202.026	2.74	0.064935	0.35156	0.49498	-1.0146	0.39394	0.74	0.68035	-0.55564	0.48485	0.73462	0.62327	-0.68208	0.0095238	0.060188	0.027038	-5.2089	0.066667	0.22266	0.054624	-4.1943	0.038095	0.17695	0.039741	-4.6532	0.038095	0.18772	0.043381	-4.5268
NEG	201.022	2.74	0.064935	0.35156	0.50412	-0.98817	0.39394	0.74	0.66759	-0.58296	0.69913	0.86627	0.6436	-0.63577	0.0095238	0.060188	0.019092	-5.7109	0.066667	0.22266	0.037872	-4.7227	0.038095	0.17695	0.028598	-5.1279	0.066667	0.26984	0.029665	-5.0751
NEG	948.612	5.33	0.064935	0.35156	1.5028	0.58768	0.48485	0.80492	0.86987	-0.20113	0.015152	0.079011	0.58494	-0.77363	0.038095	0.14719	0.39255	-1.349	0.0095238	0.077098	0.26121	-1.9367	0.066667	0.25241	0.45128	-1.1479	0.17143	0.44493	0.6711	-0.5754
NEG	760.504	8.29	0.064935	0.35156	0.65384	-0.613	0.48485	0.80492	0.90624	-0.14204	0.025974	0.11236	0.63366	-0.65822	0.019048	0.093317	0.47621	-1.0703	0.25714	0.48625	0.72833	-0.45733	0.038095	0.17695	0.52548	-0.92829	0.47619	0.72996	0.75152	-0.41211
NEG	512.298	4.8	0.064935	0.35156	0.69826	-0.51816	0.48485	0.80492	0.86016	-0.21732	0.064935	0.21107	0.57758	-0.79191	0.0095238	0.060188	0.14466	-2.7892	0.0095238	0.077098	0.20717	-2.2711	0.0095238	0.10513	0.16818	-2.5719	0.0095238	0.088959	0.25046	-1.9973
NEG	1129.79	12.05	0.064935	0.35156	1.1362	0.18424	0.48485	0.80492	1.0895	0.12362	0.064935	0.21107	1.1944	0.2563	0.7619	0.8687	1.0608	0.085194	0.47619	0.67517	0.93365	-0.099048	1	1	0.97372	-0.038426	0.25714	0.51611	0.88816	-0.17111
NEG	829.578	8.92	0.064935	0.35156	0.82552	-0.27663	0.48485	0.80492	0.98748	-0.018181	0.13203	0.34269	0.87926	-0.18563	0.17143	0.38396	0.66312	-0.59267	0.25714	0.48625	0.80327	-0.31604	0.17143	0.4122	0.67153	-0.57449	0.25714	0.51611	0.75417	-0.40703
NEG	817.481	8	0.064935	0.35156	1.2587	0.33194	0.48485	0.80492	1.1012	0.13906	0.48485	0.73462	0.92314	-0.11538	0.47619	0.67913	1.1444	0.19462	0.7619	0.86812	0.9092	-0.13732	0.7619	0.88776	1.0393	0.055555	0.25714	0.51611	1.2397	0.31
NEG	322.045	2.79	0.064935	0.35156	0.35039	-1.513	0.48485	0.80492	0.55993	-0.83669	0.93723	0.96622	0.74036	-0.43371	0.0095238	0.060188	0.080345	-3.6377	0.35238	0.57325	0.2293	-2.1247	0.019048	0.11993	0.14349	-2.801	0.019048	0.12901	0.10852	-3.2039
NEG	592.161	3.03	0.064935	0.35156	1.8198	0.86379	0.48485	0.80492	0.96678	-0.048741	0.93723	0.96622	0.99156	-0.012226	0.25714	0.48091	2.3597	1.2386	0.47619	0.67517	1.2967	0.37484	0.25714	0.49172	2.4408	1.2874	0.25714	0.51611	2.3798	1.2509
NEG	627.559	10.25	0.064935	0.35156	0.94848	-0.076313	0.58874	0.86881	0.98936	-0.015437	0.58874	0.79245	1.0227	0.032353	0.91429	0.96003	1.0092	0.013163	0.11429	0.31236	1.064	0.089475	0.11429	0.33848	1.02	0.0286	0.7619	0.90703	0.98679	-0.01919
NEG	402.911	0.27	0.064935	0.35156	0.83993	-0.25167	0.58874	0.86881	0.90989	-0.13624	0.69913	0.86627	1.0522	0.073347	0.7619	0.8687	1.0553	0.077689	0.25714	0.48625	1.2565	0.32935	0.25714	0.49172	1.1598	0.21393	1	1	1.003	0.0043417
NEG	790.566	9.06	0.064935	0.35156	0.73494	-0.44429	0.69913	0.91075	0.86513	-0.20901	0.093074	0.26863	0.72177	-0.47039	0.11429	0.30644	0.58894	-0.76381	0.60952	0.77155	0.80134	-0.31952	0.17143	0.4122	0.68075	-0.5548	0.60952	0.82434	0.81596	-0.29342
NEG	787.567	9.02	0.064935	0.35156	0.77862	-0.36101	0.81818	0.95398	0.90929	-0.13719	0.48485	0.73462	0.88365	-0.17845	0.038095	0.14719	0.72794	-0.45811	0.25714	0.48625	0.93491	-0.097106	0.25714	0.49172	0.80056	-0.32092	0.066667	0.26984	0.82378	-0.27966
NEG	661.26	5.11	0.064935	0.35156	1.2334	0.30266	0.93723	0.98595	#N/A	#N/A	0.093074	0.26863	1.1869	0.24716	0.7619	0.8687	0.92065	-0.11928	0.17143	0.3965	0.74642	-0.42194	0.91429	0.9666	0.92064	-0.11929	0.47619	0.72996	0.7757	-0.36644
NEG	566.898	12.04	0.064935	0.35156	0.90075	-0.15081	0.93723	0.98595	0.98817	-0.017166	0.24026	0.49508	0.91478	-0.1285	0.91429	0.96003	0.99514	-0.0070303	0.35238	0.57325	1.1048	0.14378	0.7619	0.88776	1.0071	0.010136	0.35238	0.62271	1.0878	0.12147
NEG	671.101	0.36	0.064935	0.35156	1.1583	0.21206	0.93723	0.98595	0.98083	-0.027929	0.93723	0.96622	0.99145	-0.012388	0.066667	0.21465	0.81519	-0.2948	0.0095238	0.077098	0.70375	-0.50686	0.066667	0.25241	0.83112	-0.26687	0.066667	0.26984	0.82222	-0.28241
NEG	388.858	12.19	0.064935	0.35156	0.8422	-0.24776	1	1	0.96256	-0.055051	0.81818	0.92235	0.96696	-0.048475	0.25714	0.48091	0.8676	-0.20489	0.91429	0.95707	1.0302	0.042866	0.47619	0.68896	0.90135	-0.14984	0.038095	0.18772	0.89725	-0.15642
NEG	92.9284	0.32	0.093074	0.43349	1.1554	0.20833	0.0021645	0.073593	1.2848	0.36156	0.0021645	0.025377	1.3157	0.39579	0.35238	0.57216	0.78494	-0.34935	0.038095	0.15643	0.67939	-0.55769	0.0095238	0.10513	0.61093	-0.71091	0.0095238	0.088959	0.59661	-0.74514
NEG	270.799	0.33	0.093074	0.43349	1.3712	0.45543	0.0021645	0.073593	1.8522	0.88923	0.0021645	0.025377	1.9627	0.97282	0.60952	0.77559	0.84679	-0.23992	0.17143	0.3965	0.61756	-0.69535	0.0095238	0.10513	0.45719	-1.1291	0.0095238	0.088959	0.43145	-1.2127
NEG	537.416	6.91	0.093074	0.43349	0.765	-0.38648	0.0021645	0.073593	3.3515	1.7448	0.93723	0.96622	2.3488	1.2319	0.0095238	0.060188	2.2794	1.1886	0.0095238	0.077098	2.9796	1.5751	0.17143	0.4122	0.6801	-0.55617	1	1	0.97046	-0.043256
NEG	553.318	5.14	0.093074	0.43349	0.78585	-0.34768	0.004329	0.082689	0.67583	-0.56526	0.0021645	0.025377	0.55799	-0.84169	0.038095	0.14719	0.53543	-0.90124	0.7619	0.86812	0.68133	-0.55357	1	1	0.79224	-0.33598	1	1	0.95956	-0.059556
NEG	563.318	4.86	0.093074	0.43349	0.59764	-0.74265	0.008658	0.1141	0.56291	-0.82902	0.0021645	0.025377	0.28596	-1.8061	0.0095238	0.060188	0.10589	-3.2394	0.0095238	0.077098	0.17717	-2.4968	0.0095238	0.10513	0.1881	-2.4104	0.0095238	0.088959	0.37028	-1.4333
NEG	610.322	5.33	0.093074	0.43349	0.86629	-0.20708	0.008658	0.1141	0.82407	-0.27916	0.008658	0.05492	0.81154	-0.30127	0.0095238	0.060188	0.49915	-1.0025	0.11429	0.31236	0.57619	-0.79537	0.11429	0.33848	0.60571	-0.7233	0.066667	0.26984	0.61507	-0.70119
NEG	240.095	3.63	0.093074	0.43349	0.60605	-0.7225	0.015152	0.14803	0.53318	-0.90731	0.093074	0.26863	0.51731	-0.95089	0.47619	0.67913	0.67101	-0.57559	0.35238	0.57325	1.1072	0.14691	0.35238	0.58501	1.2585	0.33172	0.35238	0.62271	1.2971	0.3753
NEG	704.786	0.32	0.093074	0.43349	1.1644	0.21964	0.015152	0.14803	1.196	0.25822	0.17965	0.41666	1.1927	0.2542	0.91429	0.96003	1.0142	0.020283	0.17143	0.3965	0.87094	-0.19936	0.25714	0.49172	0.84796	-0.23794	0.17143	0.44493	0.85032	-0.23391
NEG	530.302	5.34	0.093074	0.43349	0.89286	-0.16349	0.025974	0.18553	0.8681	-0.20407	0.0021645	0.025377	0.75622	-0.40312	0.0095238	0.060188	0.44049	-1.1828	0.038095	0.15643	0.49334	-1.0193	0.038095	0.17695	0.50741	-0.97876	0.17143	0.44493	0.58248	-0.77971
NEG	928.501	8.94	0.093074	0.43349	0.83394	-0.26198	0.025974	0.18553	1.1944	0.25629	0.24026	0.49508	1.0813	0.11271	0.91429	0.96003	1.0024	0.0034808	0.17143	0.3965	1.202	0.26546	0.17143	0.4122	0.83926	-0.25281	0.47619	0.72996	0.92708	-0.10923
NEG	541.333	5.34	0.093074	0.43349	0.8753	-0.19215	0.041126	0.23619	0.85431	-0.22716	0.0021645	0.025377	0.70973	-0.49466	0.0095238	0.060188	0.39993	-1.3222	0.066667	0.22266	0.4569	-1.13	0.038095	0.17695	0.46813	-1.095	0.25714	0.51611	0.56349	-0.82754
NEG	552.366	6.14	0.093074	0.43349	0.67381	-0.56958	0.041126	0.23619	0.57097	-0.8085	0.015152	0.079011	0.61982	-0.69009	0.066667	0.21465	0.33997	-1.5565	0.25714	0.48625	0.50455	-0.98692	0.25714	0.49172	0.59543	-0.74801	0.25714	0.51611	0.54851	-0.86642
NEG	585.35	5.96	0.093074	0.43349	0.80579	-0.31152	0.041126	0.23619	0.81231	-0.29989	0.025974	0.11236	0.67799	-0.56067	0.019048	0.093317	0.49654	-1.01	0.11429	0.31236	0.61621	-0.6985	0.066667	0.25241	0.61127	-0.71012	0.25714	0.51611	0.73238	-0.44934
NEG	239.09	3.63	0.093074	0.43349	0.62054	-0.68839	0.041126	0.23619	0.54162	-0.88464	0.041126	0.15468	0.50327	-0.99059	0.47619	0.67913	0.66831	-0.5814	0.35238	0.57325	1.077	0.10699	0.47619	0.68896	1.2339	0.30324	0.17143	0.44493	1.3279	0.40919
NEG	195.096	3.63	0.093074	0.43349	0.619	-0.692	0.041126	0.23619	0.55035	-0.86158	0.064935	0.21107	0.50923	-0.9736	0.60952	0.77559	0.69323	-0.5286	0.25714	0.48625	1.1199	0.1634	0.47619	0.68896	1.2596	0.33298	0.17143	0.44493	1.3613	0.445
NEG	669.289	5.96	0.093074	0.43349	0.85505	-0.22592	0.064935	0.3041	0.81811	-0.28963	0.015152	0.079011	0.75404	-0.40728	0.019048	0.093317	0.51784	-0.94942	0.11429	0.31236	0.60563	-0.72349	0.066667	0.25241	0.63297	-0.65978	0.17143	0.44493	0.68675	-0.54214
NEG	459.911	0.41	0.093074	0.43349	1.1915	0.25282	0.064935	0.3041	1.2699	0.34472	0.025974	0.11236	1.3002	0.37878	0.47619	0.67913	0.91561	-0.1272	0.17143	0.3965	0.76843	-0.38001	0.038095	0.17695	0.721	-0.47192	0.019048	0.12901	0.70418	-0.50598
NEG	257.819	0.61	0.093074	0.43349	1.1529	0.2053	0.064935	0.3041	1.3055	0.38465	0.13203	0.34269	1.2335	0.30271	0.7619	0.8687	1.0173	0.024693	0.25714	0.48625	0.88233	-0.18061	0.066667	0.25241	0.77919	-0.35996	0.066667	0.26984	0.82473	-0.27801
NEG	186.045	0.39	0.093074	0.43349	0.67559	-0.56578	0.064935	0.3041	0.64308	-0.63692	0.24026	0.49508	0.80652	-0.31022	0.17143	0.38396	0.64969	-0.62217	0.60952	0.77155	0.96166	-0.056397	1	1	1.0103	0.01475	0.25714	0.51611	0.80555	-0.31196
NEG	187.042	0.39	0.093074	0.43349	0.65103	-0.61919	0.064935	0.3041	0.62882	-0.66927	0.24026	0.49508	0.77891	-0.36046	0.17143	0.38396	0.67032	-0.57709	0.7619	0.86812	1.0296	0.042105	0.91429	0.9666	1.066	0.092186	0.35238	0.62271	0.86058	-0.21662
NEG	738.273	5.96	0.093074	0.43349	0.86889	-0.20276	0.064935	0.3041	0.87452	-0.19343	0.24026	0.49508	0.89695	-0.1569	0.019048	0.093317	0.68824	-0.53901	0.25714	0.48625	0.7921	-0.33625	0.17143	0.4122	0.78699	-0.34557	0.11429	0.3578	0.76732	-0.38211
NEG	357.026	0.35	0.093074	0.43349	1.0635	0.088869	0.093074	0.37317	1.0531	0.074576	0.093074	0.26863	1.0699	0.09754	0.066667	0.21465	0.89538	-0.15943	0.0095238	0.077098	0.84189	-0.2483	0.019048	0.11993	0.85027	-0.23401	0.0095238	0.088959	0.83684	-0.25697
NEG	495.74	12.89	0.093074	0.43349	1.1208	0.1645	0.093074	0.37317	1.079	0.10966	0.39394	0.66372	1.0439	0.062002	0.91429	0.96003	1.0499	0.070229	0.25714	0.48625	0.93675	-0.094268	0.47619	0.68896	0.97304	-0.039436	0.7619	0.90703	1.0057	0.0082267
NEG	553.369	6.14	0.093074	0.43349	0.68027	-0.55581	0.13203	0.45254	0.74121	-0.43204	0.015152	0.079011	0.72591	-0.46214	0.019048	0.093317	0.35602	-1.49	0.11429	0.31236	0.52336	-0.93414	0.066667	0.25241	0.48033	-1.0579	0.17143	0.44493	0.49046	-1.0278
NEG	710.243	5.35	0.093074	0.43349	0.80326	-0.31605	0.13203	0.45254	0.83915	-0.253	0.041126	0.15468	0.79838	-0.32485	0.0095238	0.060188	0.62658	-0.67444	0.25714	0.48625	0.78004	-0.35839	0.17143	0.4122	0.74668	-0.42144	0.17143	0.44493	0.78481	-0.34959
NEG	240.921	0.29	0.093074	0.43349	0.91382	-0.13001	0.17965	0.5396	1.0704	0.098085	0.17965	0.41666	1.0893	0.12342	0.11429	0.30644	0.90549	-0.14322	0.7619	0.86812	0.99088	-0.013211	0.038095	0.17695	0.84598	-0.24131	0.019048	0.12901	0.83125	-0.26664
NEG	583.255	7.06	0.093074	0.43349	1.6003	0.67837	0.17965	0.5396	1.5443	0.62693	0.17965	0.41666	1.3831	0.46793	0.0095238	0.060188	2.8567	1.5144	0.038095	0.15643	1.7851	0.836	0.0095238	0.10513	1.8499	0.88744	0.0095238	0.088959	2.0654	1.0464
NEG	255.157	3.96	0.093074	0.43349	0.46637	-1.1004	0.17965	0.5396	0.69647	-0.52188	0.30952	0.5757	0.63684	-0.65101	0.038095	0.14719	0.30921	-1.6933	0.25714	0.48625	0.66301	-0.5929	0.066667	0.25241	0.44397	-1.1715	0.066667	0.26984	0.48554	-1.0423
NEG	571.497	10.34	0.093074	0.43349	0.91915	-0.12163	0.17965	0.5396	0.94337	-0.084112	0.48485	0.73462	0.94622	-0.079746	0.47619	0.67913	0.97034	-0.043432	0.47619	0.67517	1.0557	0.078202	0.47619	0.68896	1.0286	0.04068	1	1	1.0255	0.036314
NEG	595.212	3.81	0.093074	0.43349	1.5341	0.61743	0.24026	0.6051	1.4628	0.54873	0.041126	0.15468	1.8147	0.85977	0.038095	0.14719	2.0814	1.0575	0.25714	0.48625	1.3567	0.44009	0.066667	0.25241	1.4229	0.50879	0.35238	0.62271	1.1469	0.19775
NEG	670.288	5.96	0.093074	0.43349	0.82424	-0.27887	0.24026	0.6051	0.85231	-0.23056	0.093074	0.26863	0.8219	-0.28297	0.0095238	0.060188	0.54935	-0.86422	0.066667	0.22266	0.66649	-0.58535	0.066667	0.25241	0.64454	-0.63366	0.066667	0.26984	0.66839	-0.58124
NEG	855.655	10.29	0.093074	0.43349	0.7917	-0.33698	0.30952	0.67547	0.81668	-0.29215	0.17965	0.41666	1.2294	0.29793	0.91429	0.96003	1.2351	0.30461	0.35238	0.57325	1.56	0.64159	0.25714	0.49172	1.5123	0.59676	0.47619	0.72996	1.0046	0.0066739
NEG	264.105	1.92	0.093074	0.43349	0.47542	-1.0727	0.30952	0.67547	1.5401	0.62302	0.30952	0.5757	1.3872	0.47222	0.066667	0.21465	0.41015	-1.2858	0.7619	0.86812	0.86271	-0.21305	0.0095238	0.10513	0.26631	-1.9088	0.0095238	0.088959	0.29566	-1.758
NEG	295.902	12.86	0.093074	0.43349	0.90677	-0.1412	0.30952	0.67547	0.94026	-0.088864	0.58874	0.79245	1.0455	0.064246	0.35238	0.57216	1.0513	0.07213	0.019048	0.10445	1.1594	0.21333	0.11429	0.33848	1.1181	0.16099	0.60952	0.82434	1.0055	0.007883
NEG	630.881	12.04	0.093074	0.43349	0.92286	-0.11582	0.30952	0.67547	1.0319	0.045325	0.93723	0.96622	0.99822	-0.0025767	1	1	0.98725	-0.018509	0.11429	0.31236	1.0698	0.097314	0.17143	0.4122	0.95672	-0.063835	1	1	0.98902	-0.015933
NEG	626.32	5.96	0.093074	0.43349	0.82982	-0.26912	0.39394	0.74	0.89738	-0.15621	0.13203	0.34269	0.81895	-0.28815	0.019048	0.093317	0.55658	-0.84535	0.11429	0.31236	0.67072	-0.57623	0.066667	0.25241	0.62022	-0.68914	0.11429	0.3578	0.67962	-0.5572
NEG	677.307	5.32	0.093074	0.43349	0.90025	-0.15161	0.39394	0.74	0.96691	-0.04854	0.48485	0.73462	0.95598	-0.064952	0.0095238	0.060188	0.62427	-0.67976	0.038095	0.15643	0.69344	-0.52815	0.0095238	0.10513	0.64563	-0.63122	0.0095238	0.088959	0.65302	-0.6148
NEG	888.56	12.2	0.093074	0.43349	0.7889	-0.34208	0.39394	0.74	0.87615	-0.19075	0.69913	0.86627	1.078	0.1084	0.91429	0.96003	1.1846	0.24436	0.25714	0.48625	1.5015	0.58643	0.35238	0.58501	1.352	0.43511	1	1	1.0988	0.13596
NEG	525.461	8.46	0.093074	0.43349	0.85252	-0.23019	0.58874	0.86881	0.95044	-0.073339	0.13203	0.34269	0.81515	-0.29486	0.25714	0.48091	0.90254	-0.14794	0.60952	0.77155	1.0587	0.082252	0.7619	0.88776	0.9496	-0.074602	0.7619	0.90703	1.1072	0.14691
NEG	421.841	0.26	0.093074	0.43349	0.87801	-0.1877	0.58874	0.86881	0.97138	-0.041891	0.93723	0.96622	0.97506	-0.03644	0.47619	0.67913	0.95314	-0.069234	0.60952	0.77155	1.0856	0.11846	0.91429	0.9666	0.98123	-0.027343	0.91429	0.97692	0.97753	-0.032794
NEG	656.316	5.11	0.093074	0.43349	1.1434	0.19332	0.69913	0.91075	1.0966	0.13303	0.13203	0.34269	1.3351	0.4169	1	1	1.0253	0.036049	1	1	0.89672	-0.15727	0.91429	0.9666	0.93499	-0.096985	0.60952	0.82434	0.76798	-0.38085
NEG	179.107	3.76	0.093074	0.43349	0.89071	-0.16697	0.69913	0.91075	0.96488	-0.051583	0.30952	0.5757	0.88452	-0.17703	0.35238	0.57216	0.91595	-0.12667	1	1	1.0283	0.040303	0.35238	0.58501	0.94929	-0.075082	0.91429	0.97692	1.0355	0.050366
NEG	142.049	0.48	0.093074	0.43349	0.77038	-0.37637	0.69913	0.91075	1.0612	0.085629	0.58874	0.79245	0.91216	-0.13264	0.35238	0.57216	1.7948	0.84381	0.066667	0.22266	2.3298	1.2202	0.7619	0.88776	1.6914	0.75819	0.17143	0.44493	1.9676	0.97645
NEG	855.83	12.04	0.093074	0.43349	0.92313	-0.1154	0.69913	0.91075	1.0792	0.10992	0.58874	0.79245	1.0938	0.12938	0.47619	0.67913	0.94379	-0.083457	0.7619	0.86812	1.0224	0.031945	0.066667	0.25241	0.87456	-0.19338	0.25714	0.51611	0.86284	-0.21284
NEG	766.537	10.1	0.093074	0.43349	1.5101	0.59466	0.81818	0.95398	1.165	0.22031	0.30952	0.5757	1.2459	0.3172	0.47619	0.67913	1.7441	0.80251	0.91429	0.95707	1.155	0.20785	0.47619	0.68896	1.4971	0.5822	0.91429	0.97692	1.3999	0.48531
NEG	527.284	3.02	0.093074	0.43349	1.7499	0.80723	0.81818	0.95398	0.82978	-0.26919	0.58874	0.79245	0.79421	-0.3324	0.11429	0.30644	2.9134	1.5427	0.47619	0.67517	1.6649	0.73546	0.038095	0.17695	3.511	1.8119	0.019048	0.12901	3.6683	1.8751
NEG	203.939	12.11	0.093074	0.43349	1.237	0.30679	0.93723	0.98595	1.0787	0.10933	0.48485	0.73462	1.0433	0.061167	0.25714	0.48091	1.2038	0.26763	0.91429	0.95707	0.97322	-0.039163	0.60952	0.79159	1.116	0.1583	0.17143	0.44493	1.1539	0.20646
NEG	462.298	5.64	0.093074	0.43349	1.4265	0.51246	0.93723	0.98595	1.0362	0.051235	0.81818	0.92235	1.0731	0.10174	0.47619	0.67913	0.87131	-0.19874	0.066667	0.22266	0.61081	-0.7112	0.35238	0.58501	0.84091	-0.24998	0.47619	0.72996	0.81198	-0.30048
NEG	589.333	5.12	0.093074	0.43349	1.2523	0.32457	0.93723	0.98595	1.0225	0.032083	0.93723	0.96622	1.1054	0.14458	0.25714	0.48091	0.70518	-0.50393	0.17143	0.3965	0.56311	-0.8285	0.25714	0.49172	0.68967	-0.53602	0.25714	0.51611	0.63794	-0.64852
NEG	763.51	8.69	0.093074	0.43349	1.6854	0.75308	1	1	1.1363	0.18432	0.69913	0.86627	1.0492	0.069246	0.25714	0.48091	1.3208	0.40137	0.60952	0.77155	0.78366	-0.3517	0.7619	0.88776	1.1624	0.21706	0.47619	0.72996	1.2589	0.33213
NEG	280.621	3.99	0.093074	0.43349	2.3935	1.2591	1	1	1.0926	0.1278	1	1	0.99851	-0.0021468	0.60952	0.77559	1.9612	0.97172	0.60952	0.77155	0.81937	-0.28742	0.7619	0.88776	1.7949	0.84393	0.60952	0.82434	1.9641	0.97387
NEG	266.804	0.33	0.13203	0.51481	1.3273	0.4085	0.0021645	0.073593	1.8707	0.9036	0.0021645	0.025377	1.9477	0.96176	0.47619	0.67913	0.75069	-0.41371	0.11429	0.31236	0.56557	-0.82221	0.0095238	0.10513	0.40128	-1.3173	0.0095238	0.088959	0.38543	-1.3755
NEG	268.801	0.33	0.13203	0.51481	1.3158	0.39591	0.0021645	0.073593	1.8366	0.87707	0.0021645	0.025377	1.9442	0.95917	0.47619	0.67913	0.76397	-0.38842	0.17143	0.3965	0.58062	-0.78433	0.0095238	0.10513	0.41596	-1.2655	0.0095238	0.088959	0.39295	-1.3476
NEG	333.256	10.63	0.13203	0.51481	0.7354	-0.4434	0.0021645	0.073593	0.47647	-1.0695	0.0021645	0.025377	0.5223	-0.93704	0.0095238	0.060188	0.16062	-2.6383	0.0095238	0.077098	0.21841	-2.1949	0.0095238	0.10513	0.3371	-1.5687	0.0095238	0.088959	0.30752	-1.7012
NEG	957.186	0.38	0.13203	0.51481	0.79513	-0.33074	0.0021645	0.073593	0.41177	-1.2801	0.004329	0.037357	0.42687	-1.2281	0.25714	0.48091	0.72193	-0.47008	0.91429	0.95707	0.90794	-0.13934	0.17143	0.4122	1.7532	0.81001	0.25714	0.51611	1.6912	0.75807
NEG	526.349	5.52	0.13203	0.51481	0.81296	-0.29874	0.0021645	0.073593	0.50526	-0.9849	0.008658	0.05492	0.67257	-0.57224	0.038095	0.14719	0.28859	-1.7929	0.066667	0.22266	0.35498	-1.4942	0.25714	0.49172	0.57116	-0.80802	0.17143	0.44493	0.42908	-1.2207
NEG	838.596	8.99	0.13203	0.51481	1.1015	0.13943	0.0021645	0.073593	0.50806	-0.97692	0.58874	0.79245	0.88678	-0.17335	0.11429	0.30644	0.51775	-0.94966	0.0095238	0.077098	0.47006	-1.0891	0.91429	0.9666	1.0191	0.027263	0.038095	0.18772	0.58386	-0.77631
NEG	839.599	9	0.13203	0.51481	1.122	0.16608	0.004329	0.082689	0.49871	-1.0037	0.81818	0.92235	0.91954	-0.12101	0.17143	0.38396	0.55842	-0.84057	0.019048	0.10445	0.4977	-1.0067	1	1	1.1197	0.16316	0.066667	0.26984	0.60728	-0.71956
NEG	208.85	0.33	0.13203	0.51481	1.2285	0.29688	0.008658	0.1141	1.4839	0.56944	0.0021645	0.025377	1.5317	0.61515	0.25714	0.48091	0.76458	-0.38726	0.038095	0.15643	0.62237	-0.68415	0.0095238	0.10513	0.51523	-0.9567	0.0095238	0.088959	0.49916	-1.0024
NEG	297.122	2.8	0.13203	0.51481	0.56726	-0.81793	0.008658	0.1141	0.2698	-1.89	0.30952	0.5757	0.65521	-0.60998	0.066667	0.21465	0.39329	-1.3463	0.35238	0.57325	0.69332	-0.5284	0.7619	0.88776	1.4577	0.5437	0.47619	0.72996	0.60026	-0.73635
NEG	941.208	0.38	0.13203	0.51481	0.76105	-0.39393	0.015152	0.14803	0.54079	-0.88686	0.015152	0.079011	0.60456	-0.72605	0.35238	0.57216	0.69533	-0.52422	0.91429	0.95707	0.91365	-0.13029	0.35238	0.58501	1.2858	0.36263	0.60952	0.82434	1.1502	0.20182
NEG	562.313	4.86	0.13203	0.51481	0.58311	-0.77815	0.025974	0.18553	0.53075	-0.9139	0.0021645	0.025377	0.24219	-2.0458	0.0095238	0.060188	0.061873	-4.0145	0.0095238	0.077098	0.10611	-3.2364	0.0095238	0.10513	0.11658	-3.1006	0.0095238	0.088959	0.25547	-1.9688
NEG	474.941	0.34	0.13203	0.51481	1.1898	0.25067	0.025974	0.18553	1.3148	0.39488	0.004329	0.037357	1.3864	0.47135	0.17143	0.38396	0.7586	-0.39859	0.019048	0.10445	0.6376	-0.64927	0.019048	0.11993	0.57695	-0.79348	0.0095238	0.088959	0.54717	-0.86995
NEG	160.842	0.58	0.13203	0.51481	1.2806	0.35677	0.025974	0.18553	1.3736	0.45798	0.015152	0.079011	1.4904	0.57568	0.7619	0.8687	1.119	0.1622	0.25714	0.48625	0.87383	-0.19457	0.17143	0.4122	0.81463	-0.29579	0.17143	0.44493	0.75081	-0.41349
NEG	555.384	6.16	0.13203	0.51481	0.72333	-0.46728	0.025974	0.18553	0.51131	-0.96772	0.17965	0.41666	0.76665	-0.38337	0.17143	0.38396	0.4193	-1.2539	0.25714	0.48625	0.57968	-0.78667	0.35238	0.58501	0.82005	-0.28622	0.25714	0.51611	0.54693	-0.87058
NEG	788.578	9.11	0.13203	0.51481	0.77124	-0.37475	0.025974	0.18553	0.62693	-0.67363	0.39394	0.66372	0.88304	-0.17945	0.0095238	0.060188	0.33727	-1.568	0.0095238	0.077098	0.43731	-1.1933	0.038095	0.17695	0.53797	-0.8944	0.0095238	0.088959	0.38194	-1.3886
NEG	429.3	4.98	0.13203	0.51481	0.6827	-0.55067	0.025974	0.18553	0.58121	-0.78286	0.69913	0.86627	0.79585	-0.32942	0.066667	0.21465	0.55291	-0.85489	0.60952	0.77155	0.80988	-0.30421	0.91429	0.9666	0.9513	-0.072027	0.066667	0.26984	0.69474	-0.52546
NEG	1005.68	5.95	0.13203	0.51481	1.3502	0.43317	0.041126	0.23619	0.71969	-0.47455	0.064935	0.21107	0.64476	-0.63317	0.019048	0.093317	0.37009	-1.4341	0.0095238	0.077098	0.2741	-1.8672	0.038095	0.17695	0.51423	-0.95951	0.066667	0.26984	0.57399	-0.80089
NEG	349.166	3.67	0.13203	0.51481	0.52082	-0.94115	0.041126	0.23619	1.7159	0.77893	0.58874	0.79245	1.1392	0.18804	0.35238	0.57216	0.81389	-0.29709	1	1	1.5627	0.64406	0.25714	0.49172	0.47433	-1.076	0.25714	0.51611	0.71443	-0.48513
NEG	662.808	0.32	0.13203	0.51481	1.1227	0.16692	0.064935	0.3041	1.1123	0.15352	0.015152	0.079011	1.2589	0.33212	0.91429	0.96003	0.96436	-0.052354	0.47619	0.67517	0.859	-0.21928	0.7619	0.88776	0.86701	-0.20587	0.25714	0.51611	0.76606	-0.38447
NEG	702.319	5.5	0.13203	0.51481	0.84727	-0.23911	0.064935	0.3041	0.78502	-0.3492	0.015152	0.079011	0.71054	-0.49301	0.0095238	0.060188	0.23661	-2.0794	0.0095238	0.077098	0.27926	-1.8403	0.0095238	0.10513	0.3014	-1.7302	0.0095238	0.088959	0.33299	-1.5864
NEG	584.258	7.06	0.13203	0.51481	1.5205	0.60456	0.064935	0.3041	1.8013	0.84903	0.093074	0.26863	1.6374	0.71138	0.019048	0.093317	2.598	1.3774	0.0095238	0.077098	1.7086	0.77282	0.17143	0.4122	1.4423	0.52835	0.0095238	0.088959	1.5867	0.666
NEG	430.303	4.98	0.13203	0.51481	0.66221	-0.59464	0.064935	0.3041	0.61222	-0.70787	0.93723	0.96622	0.86723	-0.20551	0.17143	0.38396	0.58321	-0.7779	0.25714	0.48625	0.88071	-0.18326	0.91429	0.9666	0.95262	-0.070029	0.0095238	0.088959	0.6725	-0.57239
NEG	438.835	0.29	0.13203	0.51481	1.1801	0.23892	0.093074	0.37317	1.2061	0.27031	0.24026	0.49508	1.2194	0.28618	0.47619	0.67913	0.90539	-0.1434	0.066667	0.22266	0.7672	-0.38232	0.066667	0.25241	0.75069	-0.41371	0.17143	0.44493	0.74248	-0.42958
NEG	238.931	12.09	0.13203	0.51481	1.0397	0.056157	0.13203	0.45254	1.0676	0.094332	0.025974	0.11236	1.0819	0.11363	0.0095238	0.060188	1.0989	0.13612	0.35238	0.57325	1.057	0.079966	0.60952	0.79159	1.0294	0.041791	0.35238	0.62271	1.0157	0.022495
NEG	251.093	3.57	0.13203	0.51481	0.88252	-0.1803	0.13203	0.45254	0.89982	-0.15228	0.30952	0.5757	0.88519	-0.17594	0.35238	0.57216	0.87867	-0.18661	0.91429	0.95707	0.99564	-0.0063067	0.91429	0.9666	0.97649	-0.034326	1	1	0.99263	-0.010676
NEG	684.261	5.1	0.13203	0.51481	1.2245	0.29222	0.13203	0.45254	0.77076	-0.37565	0.48485	0.73462	0.87318	-0.19564	0.7619	0.8687	0.81108	-0.30208	0.35238	0.57325	0.66236	-0.5943	1	1	1.0523	0.07357	1	1	0.92888	-0.10644
NEG	731.038	0.36	0.13203	0.51481	1.147	0.19788	0.13203	0.45254	0.82977	-0.26922	0.48485	0.73462	0.89602	-0.15839	0.019048	0.093317	0.67071	-0.57625	0.0095238	0.077098	0.58474	-0.77412	0.038095	0.17695	0.80831	-0.30702	0.17143	0.44493	0.74854	-0.41786
NEG	92.9535	12.16	0.13203	0.51481	1.0504	0.071007	0.13203	0.45254	1.0918	0.12675	0.58874	0.79245	1.0412	0.058294	0.35238	0.57216	1.0847	0.11733	0.60952	0.77155	1.0326	0.046321	1	1	0.99349	-0.0094198	0.47619	0.72996	1.0418	0.059034
NEG	140.888	12.25	0.13203	0.51481	0.94116	-0.087488	0.13203	0.45254	1.0787	0.10925	0.93723	0.96622	1.0207	0.029488	1	1	1.0036	0.0051951	0.25714	0.48625	1.0664	0.092683	0.25714	0.49172	0.93041	-0.10406	0.47619	0.72996	0.9833	-0.024293
NEG	1015.57	9.07	0.13203	0.51481	0.85988	-0.2178	0.13203	0.45254	0.84067	-0.25038	0.93723	0.96622	0.97709	-0.033435	0.25714	0.48091	1.2639	0.33784	0.17143	0.3965	1.4698	0.55564	0.11429	0.33848	1.5034	0.58823	0.25714	0.51611	1.2935	0.37128
NEG	384.016	3.63	0.13203	0.51481	0.74613	-0.4225	0.17965	0.5396	0.76411	-0.38815	0.015152	0.079011	0.62451	-0.67921	0.7619	0.8687	0.89158	-0.16557	0.17143	0.3965	1.1949	0.25693	0.60952	0.79159	1.1668	0.22258	0.038095	0.18772	1.4276	0.51364
NEG	833.607	10.08	0.13203	0.51481	0.79075	-0.3387	0.17965	0.5396	0.81373	-0.29737	0.064935	0.21107	0.77194	-0.37343	0.17143	0.38396	0.69604	-0.52275	0.35238	0.57325	0.88023	-0.18405	0.47619	0.68896	0.85537	-0.22538	0.35238	0.62271	0.90168	-0.14932
NEG	1146.79	12.05	0.13203	0.51481	0.85074	-0.23321	0.17965	0.5396	0.90067	-0.15092	0.30952	0.5757	0.91558	-0.12725	0.7619	0.8687	0.95274	-0.069847	0.35238	0.57325	1.1199	0.16337	0.91429	0.9666	1.0578	0.081075	0.91429	0.97692	1.0406	0.0574
NEG	608.317	5.33	0.13203	0.51481	0.93379	-0.098824	0.24026	0.6051	0.91743	-0.12433	0.0021645	0.025377	0.83317	-0.26333	0.019048	0.093317	0.52061	-0.94173	0.038095	0.15643	0.55752	-0.84291	0.11429	0.33848	0.56746	-0.8174	0.25714	0.51611	0.62486	-0.67841
NEG	164.921	0.29	0.13203	0.51481	1.0774	0.10753	0.24026	0.6051	1.0903	0.1247	0.064935	0.21107	1.1541	0.20682	0.47619	0.67913	0.90651	-0.1416	0.066667	0.22266	0.8414	-0.24913	0.11429	0.33848	0.83145	-0.2663	0.019048	0.12901	0.78544	-0.34842
NEG	339.214	6.15	0.13203	0.51481	0.73381	-0.44652	0.24026	0.6051	0.7578	-0.40011	0.093074	0.26863	0.74967	-0.41566	0.35238	0.57216	0.75439	-0.40661	0.91429	0.95707	1.028	0.039909	0.91429	0.9666	0.9955	-0.0065011	0.7619	0.90703	1.0063	0.0090557
NEG	145.061	1.92	0.13203	0.51481	0.49821	-1.0052	0.24026	0.6051	1.5965	0.67488	0.17965	0.41666	1.5061	0.59077	0.066667	0.21465	0.42287	-1.2417	0.60952	0.77155	0.84878	-0.23655	0.0095238	0.10513	0.26488	-1.9166	0.0095238	0.088959	0.28078	-1.8325
NEG	478.292	4.98	0.13203	0.51481	0.70605	-0.50215	0.30952	0.67547	0.76221	-0.39174	0.0021645	0.025377	0.43838	-1.1897	0.0095238	0.060188	0.14083	-2.828	0.0095238	0.077098	0.19946	-2.3258	0.0095238	0.10513	0.18476	-2.4362	0.0095238	0.088959	0.32125	-1.6382
NEG	359.188	4.16	0.13203	0.51481	0.48627	-1.0402	0.30952	0.67547	0.66305	-0.5928	0.041126	0.15468	0.41607	-1.2651	0.0095238	0.060188	0.17669	-2.5007	0.0095238	0.077098	0.36336	-1.4605	0.11429	0.33848	0.26648	-1.9079	0.11429	0.3578	0.42467	-1.2356
NEG	513.302	4.8	0.13203	0.51481	0.75969	-0.39653	0.30952	0.67547	0.86391	-0.21105	0.064935	0.21107	0.64582	-0.63081	0.0095238	0.060188	0.2092	-2.257	0.0095238	0.077098	0.27538	-1.8605	0.0095238	0.10513	0.24216	-2.046	0.0095238	0.088959	0.32393	-1.6262
NEG	884.563	9.1	0.13203	0.51481	0.79483	-0.33129	0.30952	0.67547	0.90449	-0.14482	0.064935	0.21107	0.74429	-0.42606	0.0095238	0.060188	0.5373	-0.89619	0.11429	0.31236	0.676	-0.56491	0.066667	0.25241	0.59404	-0.75138	0.25714	0.51611	0.7219	-0.47014
NEG	263.103	1.92	0.13203	0.51481	0.48731	-1.0371	0.30952	0.67547	1.5866	0.66594	0.17965	0.41666	1.5005	0.58543	0.11429	0.30644	0.4273	-1.2267	0.60952	0.77155	0.87686	-0.18958	0.019048	0.11993	0.26932	-1.8926	0.0095238	0.088959	0.28477	-1.8121
NEG	872.563	9.28	0.13203	0.51481	1.1696	0.22596	0.30952	0.67547	1.093	0.12827	0.24026	0.49508	1.1383	0.1869	1	1	1.053	0.074519	0.47619	0.67517	0.90035	-0.15144	0.7619	0.88776	0.96343	-0.053749	0.60952	0.82434	0.92506	-0.11238
NEG	328.659	3.87	0.13203	0.51481	2.1021	1.0718	0.30952	0.67547	1.6282	0.7033	0.30952	0.5757	1.8453	0.88382	0.7619	0.8687	1.5579	0.63958	0.7619	0.86812	0.74111	-0.43224	1	1	0.95679	-0.063721	0.7619	0.90703	0.84426	-0.24425
NEG	617.364	5.55	0.13203	0.51481	1.4206	0.50647	0.39394	0.74	0.7806	-0.35735	0.064935	0.21107	0.72558	-0.46279	0.0095238	0.060188	0.4429	-1.1749	0.0095238	0.077098	0.31178	-1.6814	0.25714	0.49172	0.56739	-0.81758	0.038095	0.18772	0.61041	-0.71214
NEG	379.241	4.79	0.13203	0.51481	0.71732	-0.47931	0.39394	0.74	0.83923	-0.25287	0.17965	0.41666	0.75855	-0.39868	0.038095	0.14719	0.52192	-0.93809	0.25714	0.48625	0.7276	-0.45878	0.0095238	0.10513	0.62191	-0.68522	0.25714	0.51611	0.68805	-0.53941
NEG	446.228	4.78	0.13203	0.51481	0.7077	-0.49879	0.39394	0.74	0.81871	-0.28857	0.24026	0.49508	0.76561	-0.38532	0.019048	0.093317	0.46907	-1.0921	0.066667	0.22266	0.66281	-0.59332	0.038095	0.17695	0.57294	-0.80354	0.038095	0.18772	0.61268	-0.70679
NEG	899.582	9.39	0.13203	0.51481	0.80294	-0.31663	0.39394	0.74	0.84969	-0.23499	0.24026	0.49508	0.83436	-0.26125	0.11429	0.30644	0.75239	-0.41046	0.60952	0.77155	0.93704	-0.093821	0.47619	0.68896	0.88548	-0.17546	0.47619	0.72996	0.90175	-0.1492
NEG	930.839	12.03	0.13203	0.51481	0.91574	-0.12698	0.39394	0.74	0.96475	-0.051768	0.48485	0.73462	0.92809	-0.10766	0.91429	0.96003	1.0122	0.017505	0.25714	0.48625	1.1053	0.14449	0.35238	0.58501	1.0492	0.069273	0.25714	0.51611	1.0906	0.12517
NEG	249.142	5.56	0.13203	0.51481	1.1422	0.19186	0.39394	0.74	1.1385	0.18718	0.69913	0.86627	1.059	0.082662	0.60952	0.77559	0.97141	-0.04184	0.17143	0.3965	0.85045	-0.2337	0.11429	0.33848	0.85321	-0.22902	0.60952	0.82434	0.91732	-0.1245
NEG	154.893	12.31	0.13203	0.51481	1.0707	0.098577	0.48485	0.80492	1.0619	0.086647	0.041126	0.15468	1.1832	0.24272	0.038095	0.14719	1.1474	0.19832	0.60952	0.77155	1.0716	0.099745	0.47619	0.68896	1.0805	0.11168	0.7619	0.90703	0.9697	-0.044394
NEG	676.304	5.32	0.13203	0.51481	0.87208	-0.19747	0.48485	0.80492	0.94783	-0.077292	0.39394	0.66372	0.91836	-0.12287	0.0095238	0.060188	0.61075	-0.71135	0.038095	0.15643	0.70034	-0.51388	0.0095238	0.10513	0.64436	-0.63406	0.0095238	0.088959	0.66504	-0.58848
NEG	805.568	8.84	0.13203	0.51481	1.0769	0.10689	0.48485	0.80492	0.95178	-0.071294	0.58874	0.79245	0.93149	-0.1024	0.60952	0.77559	1.0306	0.043521	0.91429	0.95707	0.95702	-0.063373	0.47619	0.68896	1.0828	0.11481	0.35238	0.62271	1.1064	0.14592
NEG	846.483	7.98	0.13203	0.51481	0.81317	-0.29836	0.58874	0.86881	0.90217	-0.14854	0.064935	0.21107	0.78209	-0.3546	0.17143	0.38396	0.72848	-0.45704	0.7619	0.86812	0.89585	-0.15868	0.25714	0.49172	0.80748	-0.30851	0.7619	0.90703	0.93146	-0.10244
NEG	950.487	8.63	0.13203	0.51481	1.1173	0.15995	0.58874	0.86881	0.92463	-0.11306	0.30952	0.5757	1.0953	0.13129	0.066667	0.21465	1.2392	0.30942	0.25714	0.48625	1.1092	0.14947	0.038095	0.17695	1.3402	0.42248	0.35238	0.62271	1.1314	0.17813
NEG	548.868	0.31	0.13203	0.51481	1.0811	0.11246	0.58874	0.86881	0.96729	-0.047983	0.58874	0.79245	1.0306	0.043418	0.11429	0.30644	0.72025	-0.47343	0.019048	0.10445	0.66624	-0.58589	0.066667	0.25241	0.74461	-0.42544	0.038095	0.18772	0.6989	-0.51685
NEG	386.897	12.09	0.13203	0.51481	0.89827	-0.15478	0.58874	0.86881	1.039	0.055173	0.81818	0.92235	1.0147	0.021018	0.60952	0.77559	0.95492	-0.066542	0.60952	0.77155	1.0631	0.088238	0.60952	0.79159	0.91909	-0.12172	0.7619	0.90703	0.94111	-0.087559
NEG	772.322	5.95	0.13203	0.51481	0.84153	-0.24891	0.69913	0.91075	0.91028	-0.13562	0.13203	0.34269	0.85316	-0.22911	0.066667	0.21465	0.60327	-0.72913	0.17143	0.3965	0.71687	-0.48022	0.11429	0.33848	0.66273	-0.59351	0.11429	0.3578	0.70709	-0.50003
NEG	978.783	12.07	0.13203	0.51481	0.91685	-0.12524	0.69913	0.91075	0.98904	-0.015895	0.17965	0.41666	1.0964	0.13283	0.91429	0.96003	0.99218	-0.011324	0.35238	0.57325	1.0822	0.11391	0.35238	0.58501	1.0032	0.0045706	0.35238	0.62271	0.90491	-0.14415
NEG	767.541	10.1	0.13203	0.51481	1.4153	0.50108	0.69913	0.91075	0.9943	-0.0082397	0.24026	0.49508	1.2082	0.27287	0.47619	0.67913	1.5342	0.61748	0.7619	0.86812	1.084	0.11641	0.47619	0.68896	1.543	0.62572	1	1	1.2698	0.34462
NEG	768.554	8.93	0.13203	0.51481	0.87019	-0.20059	0.81818	0.95398	1.0125	0.017881	0.17965	0.41666	0.90456	-0.14472	0.25714	0.48091	0.76047	-0.39503	0.60952	0.77155	0.87391	-0.19444	0.25714	0.49172	0.7511	-0.41291	0.35238	0.62271	0.84071	-0.25031
NEG	535.52	9.27	0.13203	0.51481	1.106	0.14538	0.81818	0.95398	1.0166	0.02377	0.24026	0.49508	0.88971	-0.16859	0.91429	0.96003	1.007	0.01006	0.17143	0.3965	0.91047	-0.13532	1	1	0.99054	-0.013709	0.17143	0.44493	1.1318	0.17865
NEG	241.122	3.66	0.13203	0.51481	0.57552	-0.79706	0.81818	0.95398	0.83376	-0.26229	0.69913	0.86627	0.79001	-0.34007	0.60952	0.77559	0.87142	-0.19855	0.0095238	0.077098	1.5141	0.5985	1	1	1.0452	0.063735	0.47619	0.72996	1.1031	0.14151
NEG	294.831	12.89	0.13203	0.51481	0.90249	-0.14802	0.81818	0.95398	1.0268	0.038211	0.93723	0.96622	1.0259	0.036921	0.35238	0.57216	0.92889	-0.10642	1	1	1.0292	0.041593	0.35238	0.58501	0.90461	-0.14463	0.35238	0.62271	0.90542	-0.14334
NEG	576.201	5.1	0.13203	0.51481	1.3017	0.38043	0.93723	0.98595	0.9358	-0.095723	0.13203	0.34269	0.6816	-0.55301	0.0095238	0.060188	0.32862	-1.6055	0.0095238	0.077098	0.25244	-1.986	0.0095238	0.10513	0.35116	-1.5098	0.0095238	0.088959	0.48213	-1.0525
NEG	130.988	12.27	0.13203	0.51481	0.94922	-0.075185	0.93723	0.98595	1.0096	0.013798	0.17965	0.41666	1.0488	0.06875	0.7619	0.8687	1.0142	0.020364	0.11429	0.31236	1.0685	0.095549	0.91429	0.9666	1.0046	0.006566	0.35238	0.62271	0.96702	-0.048386
NEG	586.817	0.3	0.13203	0.51481	0.85138	-0.23213	0.93723	0.98595	1.0129	0.018444	0.24026	0.49508	0.9316	-0.10221	0.60952	0.77559	1.0949	0.13083	0.47619	0.67517	1.2861	0.36296	0.60952	0.79159	1.081	0.11239	1	1	1.1753	0.23304
NEG	830.495	8.68	0.13203	0.51481	1.492	0.57723	0.93723	0.98595	1.1468	0.19765	0.48485	0.73462	1.1275	0.17312	0.35238	0.57216	1.4113	0.497	1	1	0.94591	-0.08023	0.47619	0.68896	1.2306	0.29935	0.60952	0.82434	1.2517	0.32388
NEG	831.495	8.69	0.13203	0.51481	1.4153	0.50106	0.93723	0.98595	1.1677	0.22366	0.48485	0.73462	1.1691	0.22534	0.60952	0.77559	1.1569	0.21024	0.60952	0.77155	0.81744	-0.29082	1	1	0.99074	-0.013418	0.91429	0.97692	0.98959	-0.0151
NEG	944.809	12.06	0.13203	0.51481	0.86965	-0.20149	0.93723	0.98595	1.0203	0.029042	0.48485	0.73462	1.1567	0.20998	0.7619	0.8687	1.0064	0.0092644	0.47619	0.67517	1.1573	0.21075	0.35238	0.58501	0.98638	-0.019777	0.47619	0.72996	0.87012	-0.20071
NEG	828.575	8.92	0.13203	0.51481	0.83748	-0.25587	1	1	1.0301	0.042756	0.13203	0.34269	0.91373	-0.13015	0.25714	0.48091	0.73415	-0.44585	0.25714	0.48625	0.87661	-0.18999	0.17143	0.4122	0.71271	-0.48861	0.25714	0.51611	0.80346	-0.3157
NEG	210.851	0.32	0.17965	0.59074	1.1745	0.23211	0.0021645	0.073593	1.3884	0.47339	0.0021645	0.025377	1.4923	0.57758	0.11429	0.30644	0.72958	-0.45487	0.019048	0.10445	0.62116	-0.68697	0.0095238	0.10513	0.52549	-0.92825	0.0095238	0.088959	0.48888	-1.0324
NEG	844.94	0.38	0.17965	0.59074	0.9153	-0.12768	0.004329	0.082689	0.70706	-0.5001	0.13203	0.34269	0.84519	-0.24265	0.038095	0.14719	0.83119	-0.26675	0.7619	0.86812	0.90811	-0.13906	0.11429	0.33848	1.1756	0.23335	1	1	0.98343	-0.024099
NEG	283.079	2.34	0.17965	0.59074	0.63136	-0.66347	0.004329	0.082689	0.27757	-1.8491	0.69913	0.86627	1.1515	0.20356	0.019048	0.093317	0.22101	-2.1778	0.11429	0.31236	0.35006	-1.5143	0.91429	0.9666	0.79623	-0.32875	0.17143	0.44493	0.19193	-2.3814
NEG	506.324	5.5	0.17965	0.59074	0.86568	-0.20809	0.008658	0.1141	0.67821	-0.5602	0.0021645	0.025377	0.5621	-0.83111	0.0095238	0.060188	0.15322	-2.7063	0.0095238	0.077098	0.17699	-2.4982	0.019048	0.11993	0.22592	-2.1461	0.0095238	0.088959	0.27258	-1.8752
NEG	1151.65	5.14	0.17965	0.59074	0.847	-0.23957	0.008658	0.1141	0.57289	-0.80368	0.0021645	0.025377	0.4278	-1.225	0.0095238	0.060188	0.056731	-4.1397	0.0095238	0.077098	0.06698	-3.9001	0.0095238	0.10513	0.099027	-3.336	0.0095238	0.088959	0.13261	-2.9147
NEG	1061.68	5.37	0.17965	0.59074	0.79427	-0.3323	0.015152	0.14803	0.63324	-0.65916	0.0021645	0.025377	0.3976	-1.3306	0.0095238	0.060188	0.121	-3.0469	0.0095238	0.077098	0.15235	-2.7146	0.019048	0.11993	0.19109	-2.3877	0.0095238	0.088959	0.30434	-1.7162
NEG	627.137	0.38	0.17965	0.59074	0.91385	-0.12997	0.015152	0.14803	0.73423	-0.44569	0.025974	0.11236	0.73949	-0.43539	0.17143	0.38396	0.81301	-0.29866	0.47619	0.67517	0.88965	-0.16869	0.60952	0.79159	1.1073	0.14704	0.60952	0.82434	1.0994	0.13674
NEG	1010.09	0.39	0.17965	0.59074	0.80212	-0.31811	0.015152	0.14803	0.60519	-0.72455	0.025974	0.11236	0.63939	-0.64524	1	1	0.89252	-0.16405	0.47619	0.67517	1.1127	0.15406	0.35238	0.58501	1.4748	0.5605	0.25714	0.51611	1.3959	0.48119
NEG	1003.67	5.95	0.17965	0.59074	1.3212	0.40182	0.025974	0.18553	0.68	-0.55639	0.0021645	0.025377	0.53965	-0.88989	0.038095	0.14719	0.34325	-1.5427	0.0095238	0.077098	0.25981	-1.9445	0.25714	0.49172	0.50478	-0.98628	0.25714	0.51611	0.63605	-0.65278
NEG	609.32	5.33	0.17965	0.59074	0.8893	-0.16925	0.025974	0.18553	0.8912	-0.16618	0.008658	0.05492	0.81406	-0.2968	0.019048	0.093317	0.50234	-0.99325	0.066667	0.22266	0.56487	-0.824	0.11429	0.33848	0.56367	-0.82707	0.17143	0.44493	0.61709	-0.69646
NEG	416.985	0.35	0.17965	0.59074	1.1131	0.15464	0.025974	0.18553	1.1735	0.23077	0.015152	0.079011	1.204	0.26786	0.066667	0.21465	0.77819	-0.3618	0.0095238	0.077098	0.69909	-0.51644	0.0095238	0.10513	0.66316	-0.59257	0.0095238	0.088959	0.64633	-0.62966
NEG	628.14	0.38	0.17965	0.59074	0.86174	-0.21468	0.025974	0.18553	0.73201	-0.45007	0.041126	0.15468	0.7366	-0.44105	0.25714	0.48091	0.79481	-0.33132	0.7619	0.86812	0.92233	-0.11665	0.7619	0.88776	1.0858	0.11875	0.60952	0.82434	1.079	0.10973
NEG	812.579	8.99	0.17965	0.59074	1.1554	0.20842	0.025974	0.18553	0.63384	-0.6578	0.39394	0.66372	1.0062	0.0089361	0.11429	0.30644	0.63336	-0.6589	0.019048	0.10445	0.54816	-0.86732	0.7619	0.88776	0.99924	-0.0010946	0.019048	0.12901	0.62945	-0.66783
NEG	557.321	5.49	0.17965	0.59074	0.82075	-0.28499	0.041126	0.23619	0.72283	-0.46828	0.004329	0.037357	0.63753	-0.64944	0.0095238	0.060188	0.24565	-2.0253	0.0095238	0.077098	0.2993	-1.7403	0.0095238	0.10513	0.33985	-1.557	0.0095238	0.088959	0.38532	-1.3759
NEG	1150.8	12.04	0.17965	0.59074	0.91391	-0.12988	0.041126	0.23619	0.88082	-0.18308	0.041126	0.15468	0.87442	-0.19361	0.7619	0.8687	0.93948	-0.090063	0.7619	0.86812	1.028	0.039813	0.60952	0.79159	1.0666	0.093018	0.60952	0.82434	1.0744	0.10354
NEG	691.502	7.29	0.17965	0.59074	1.47	0.55584	0.041126	0.23619	3.7518	1.9076	0.30952	0.5757	1.3052	0.38426	0.17143	0.38396	1.6906	0.7575	0.7619	0.86812	1.15	0.20166	0.35238	0.58501	0.4506	-1.1501	0.47619	0.72996	1.2953	0.37324
NEG	837.588	8.87	0.17965	0.59074	0.74299	-0.42858	0.041126	0.23619	0.61733	-0.69589	0.30952	0.5757	0.79723	-0.32693	0.7619	0.8687	0.78106	-0.35649	1	1	1.0512	0.072091	0.7619	0.88776	1.2652	0.3394	0.91429	0.97692	0.97972	-0.029565
NEG	472.946	0.34	0.17965	0.59074	1.2245	0.29217	0.064935	0.3041	1.2934	0.3712	0.064935	0.21107	1.2849	0.3616	0.60952	0.77559	0.80061	-0.32084	0.25714	0.48625	0.65383	-0.61301	0.11429	0.33848	0.61898	-0.69203	0.17143	0.44493	0.62311	-0.68244
NEG	261.062	3.63	0.17965	0.59074	0.70304	-0.50833	0.064935	0.3041	0.63637	-0.65207	0.093074	0.26863	0.59646	-0.74549	0.60952	0.77559	0.75058	-0.41392	0.25714	0.48625	1.0676	0.09441	0.47619	0.68896	1.1795	0.23815	0.17143	0.44493	1.2584	0.33158
NEG	948.585	9.1	0.17965	0.59074	0.84182	-0.24842	0.064935	0.3041	0.7413	-0.43187	0.58874	0.79245	0.94241	-0.085574	0.60952	0.77559	1.1382	0.18672	0.35238	0.57325	1.352	0.43513	0.35238	0.58501	1.5354	0.61858	0.7619	0.90703	1.2077	0.27229
NEG	552.316	5.14	0.17965	0.59074	0.79523	-0.33055	0.093074	0.37317	0.67691	-0.56296	0.008658	0.05492	0.5897	-0.76195	0.038095	0.14719	0.43469	-1.202	0.11429	0.31236	0.54662	-0.8714	0.17143	0.4122	0.64216	-0.63899	0.7619	0.90703	0.73714	-0.44
NEG	440.884	0.28	0.17965	0.59074	1.0426	0.060138	0.093074	0.37317	1.1162	0.1586	0.17965	0.41666	1.0688	0.095926	0.17143	0.38396	0.90838	-0.13863	0.038095	0.15643	0.87129	-0.19877	0.019048	0.11993	0.81382	-0.29723	0.038095	0.18772	0.84995	-0.23456
NEG	813.583	8.99	0.17965	0.59074	1.1318	0.17867	0.093074	0.37317	0.64239	-0.63847	0.24026	0.49508	1.0038	0.005442	0.038095	0.14719	0.59515	-0.74867	0.0095238	0.077098	0.52583	-0.92734	0.60952	0.79159	0.92646	-0.1102	0.0095238	0.088959	0.59291	-0.75411
NEG	711.985	0.51	0.17965	0.59074	0.91847	-0.1227	0.093074	0.37317	0.89419	-0.16135	0.69913	0.86627	0.97597	-0.035087	1	1	0.93594	-0.095516	0.91429	0.95707	1.019	0.027183	0.7619	0.88776	1.0467	0.06583	0.60952	0.82434	0.95898	-0.060429
NEG	601.278	11.99	0.17965	0.59074	0.8088	-0.30614	0.13203	0.45254	0.7488	-0.41735	0.015152	0.079011	0.63371	-0.6581	0.17143	0.38396	0.71385	-0.4863	1	1	0.8826	-0.18017	0.60952	0.79159	0.95333	-0.068955	0.60952	0.82434	1.1265	0.1718
NEG	233.077	0.4	0.17965	0.59074	0.90144	-0.1497	0.13203	0.45254	0.88248	-0.18037	0.041126	0.15468	0.8295	-0.26968	0.7619	0.8687	1.2505	0.32255	0.25714	0.48625	1.3873	0.47225	0.17143	0.4122	1.4171	0.50291	0.066667	0.26984	1.5076	0.59223
NEG	612.328	5.1	0.17965	0.59074	1.1478	0.19887	0.13203	0.45254	0.76048	-0.39502	0.17965	0.41666	0.83051	-0.26793	0.60952	0.77559	0.79891	-0.3239	0.47619	0.67517	0.69604	-0.52277	0.91429	0.9666	1.0505	0.071126	0.91429	0.97692	0.96195	-0.055967
NEG	908.515	8.63	0.17965	0.59074	0.86407	-0.21078	0.13203	0.45254	0.84606	-0.24117	0.93723	0.96622	1.033	0.046854	0.7619	0.8687	1.0417	0.058918	0.47619	0.67517	1.2056	0.2697	0.47619	0.68896	1.2312	0.30008	1	1	1.0084	0.012064
NEG	610.178	3.81	0.17965	0.59074	1.5254	0.60919	0.17965	0.5396	1.564	0.64526	0.015152	0.079011	2.1526	1.1061	0.019048	0.093317	2.6706	1.4172	0.066667	0.22266	1.7507	0.80797	0.11429	0.33848	1.7075	0.77189	0.60952	0.82434	1.2407	0.3111
NEG	794.533	8.85	0.17965	0.59074	1.1217	0.16575	0.17965	0.5396	1.135	0.18265	0.025974	0.11236	1.1468	0.1976	0.60952	0.77559	1.0368	0.052184	0.60952	0.77155	0.9243	-0.11357	0.35238	0.58501	0.91354	-0.13046	0.25714	0.51611	0.90412	-0.14542
NEG	262.065	3.63	0.17965	0.59074	0.64048	-0.64277	0.17965	0.5396	0.57155	-0.80705	0.064935	0.21107	0.54074	-0.887	0.35238	0.57216	0.69002	-0.5353	0.47619	0.67517	1.0773	0.10747	0.47619	0.68896	1.2073	0.27175	0.25714	0.51611	1.2761	0.3517
NEG	872.564	10.04	0.17965	0.59074	1.1792	0.23778	0.17965	0.5396	1.194	0.25577	0.81818	0.92235	1.0416	0.05879	0.7619	0.8687	1.1653	0.22069	0.91429	0.95707	0.98822	-0.017092	0.91429	0.9666	0.97598	-0.035078	1	1	1.1188	0.1619
NEG	243.157	3.94	0.17965	0.59074	0.85	-0.23446	0.17965	0.5396	0.91293	-0.13143	0.93723	0.96622	1.0387	0.054717	0.7619	0.8687	1.0961	0.13241	0.11429	0.31236	1.2896	0.36687	0.17143	0.4122	1.2007	0.26384	0.47619	0.72996	1.0553	0.077696
NEG	360.912	2.69	0.17965	0.59074	1.1391	0.18788	0.24026	0.6051	1.2188	0.28544	0.13203	0.34269	1.1687	0.22492	0.35238	0.57216	1.0828	0.1147	0.60952	0.77155	0.95054	-0.073179	0.47619	0.68896	0.88839	-0.17073	0.47619	0.72996	0.92645	-0.11021
NEG	331.091	1.92	0.17965	0.59074	0.56046	-0.83532	0.24026	0.6051	1.6487	0.72133	0.24026	0.49508	1.4975	0.58251	0.066667	0.21465	0.47525	-1.0732	0.91429	0.95707	0.84797	-0.23792	0.0095238	0.10513	0.28826	-1.7946	0.019048	0.12901	0.31737	-1.6558
NEG	132.018	0.34	0.17965	0.59074	0.87009	-0.20077	0.24026	0.6051	0.82591	-0.27595	0.39394	0.66372	0.89031	-0.16761	0.11429	0.30644	1.926	0.9456	0.038095	0.15643	2.2136	1.1464	0.038095	0.17695	2.332	1.2215	0.038095	0.18772	2.1633	1.1132
NEG	391.252	10.97	0.17965	0.59074	0.88523	-0.17587	0.24026	0.6051	0.95981	-0.059173	0.58874	0.79245	0.97725	-0.033199	0.47619	0.67913	1.0389	0.055102	0.0095238	0.077098	1.1736	0.23097	0.35238	0.58501	1.0824	0.11427	0.25714	0.51611	1.0631	0.088301
NEG	546.282	5.48	0.17965	0.59074	1.3022	0.38093	0.30952	0.67547	0.83516	-0.25988	0.064935	0.21107	0.65815	-0.60352	0.0095238	0.060188	0.31081	-1.6859	0.0095238	0.077098	0.23868	-2.0668	0.0095238	0.10513	0.37216	-1.426	0.066667	0.26984	0.47225	-1.0824
NEG	361.165	6.28	0.17965	0.59074	0.91252	-0.13208	0.30952	0.67547	0.94554	-0.080783	0.13203	0.34269	0.86521	-0.20888	0.47619	0.67913	1.3807	0.46539	0.11429	0.31236	1.5131	0.59747	0.11429	0.33848	1.4602	0.54617	0.019048	0.12901	1.5958	0.67427
NEG	322.881	0.3	0.17965	0.59074	0.93455	-0.097652	0.30952	0.67547	1.0709	0.098848	0.17965	0.41666	1.1276	0.17329	0.0095238	0.060188	0.7671	-0.38252	0.066667	0.22266	0.82082	-0.28487	0.0095238	0.10513	0.7163	-0.48137	0.019048	0.12901	0.68027	-0.55581
NEG	378.241	4.78	0.17965	0.59074	0.75751	-0.40066	0.30952	0.67547	0.77402	-0.36957	0.17965	0.41666	0.73485	-0.44447	0.019048	0.093317	0.40237	-1.3134	0.0095238	0.077098	0.53118	-0.91273	0.019048	0.11993	0.51985	-0.94383	0.17143	0.44493	0.54756	-0.86892
NEG	870.548	8.89	0.17965	0.59074	1.1669	0.22273	0.30952	0.67547	1.1294	0.17554	0.17965	0.41666	1.1743	0.23177	0.25714	0.48091	1.2699	0.34474	0.7619	0.86812	1.0883	0.12201	0.7619	0.88776	1.1244	0.1692	1	1	1.0815	0.11297
NEG	271.228	6.15	0.17965	0.59074	0.77255	-0.3723	0.30952	0.67547	0.80943	-0.30503	0.39394	0.66372	0.81808	-0.28969	0.60952	0.77559	0.82921	-0.2702	0.91429	0.95707	1.0733	0.10211	0.91429	0.9666	1.0244	0.034831	0.7619	0.90703	1.0136	0.019494
NEG	658.325	3.87	0.17965	0.59074	2.0432	1.0309	0.30952	0.67547	1.4544	0.54043	0.39394	0.66372	1.6998	0.76537	0.7619	0.8687	1.1836	0.24324	0.7619	0.86812	0.5793	-0.78762	0.47619	0.68896	0.81383	-0.2972	0.47619	0.72996	0.69634	-0.52214
NEG	678.168	3.8	0.17965	0.59074	1.4049	0.49043	0.39394	0.74	1.2929	0.37066	0.008658	0.05492	1.8557	0.89196	0.038095	0.14719	2.034	1.0243	0.038095	0.15643	1.4478	0.53388	0.038095	0.17695	1.5732	0.65366	0.7619	0.90703	1.0961	0.13236
NEG	627.321	5.96	0.17965	0.59074	0.91811	-0.12325	0.39394	0.74	0.97631	-0.034591	0.17965	0.41666	0.90706	-0.14073	0.019048	0.093317	0.58611	-0.77075	0.019048	0.10445	0.63839	-0.6475	0.019048	0.11993	0.60033	-0.73616	0.038095	0.18772	0.64617	-0.63002
NEG	364.878	12.12	0.17965	0.59074	0.90794	-0.13933	0.39394	0.74	1.066	0.092274	0.30952	0.5757	1.0762	0.10601	0.60952	0.77559	1.0548	0.077026	0.11429	0.31236	1.1618	0.21635	0.91429	0.9666	0.98949	-0.015249	0.91429	0.97692	0.98011	-0.028985
NEG	272.231	6.15	0.17965	0.59074	0.76516	-0.38616	0.39394	0.74	0.79227	-0.33594	0.39394	0.66372	0.81107	-0.30211	0.35238	0.57216	0.80482	-0.31326	0.91429	0.95707	1.0518	0.0729	1	1	1.0158	0.022678	1	1	0.9923	-0.011157
NEG	896.563	8.97	0.17965	0.59074	0.9017	-0.14928	0.39394	0.74	1.0685	0.095618	0.48485	0.73462	1.0232	0.033119	0.038095	0.14719	0.78992	-0.34023	0.25714	0.48625	0.87603	-0.19095	0.038095	0.17695	0.73926	-0.43585	0.038095	0.18772	0.77199	-0.37335
NEG	732.039	0.36	0.17965	0.59074	1.0771	0.10715	0.39394	0.74	0.87607	-0.19089	0.69913	0.86627	0.99772	-0.0032996	0.038095	0.14719	0.68228	-0.55156	0.0095238	0.077098	0.63344	-0.65871	0.11429	0.33848	0.7788	-0.36067	0.038095	0.18772	0.68384	-0.54826
NEG	733.548	8.18	0.17965	0.59074	0.85713	-0.22241	0.39394	0.74	0.9278	-0.10811	0.69913	0.86627	1.0339	0.048107	0.25714	0.48091	0.86596	-0.20763	0.7619	0.86812	1.0103	0.014783	0.47619	0.68896	0.93335	-0.099512	0.35238	0.62271	0.83756	-0.25573
NEG	1195.77	12.03	0.17965	0.59074	0.88022	-0.18406	0.39394	0.74	1.0376	0.053228	1	1	0.99373	-0.0090699	0.47619	0.67913	1.016	0.022831	0.0095238	0.077098	1.1542	0.20689	1	1	0.97915	-0.030397	1	1	1.0224	0.031901
NEG	738.731	0.32	0.17965	0.59074	1.133	0.18011	0.48485	0.80492	0.92663	-0.10994	0.30952	0.5757	0.89851	-0.15439	0.0095238	0.060188	0.62628	-0.67512	0.0095238	0.077098	0.55278	-0.85523	0.0095238	0.10513	0.67587	-0.56518	0.019048	0.12901	0.69702	-0.52073
NEG	986.18	0.36	0.17965	0.59074	1.1123	0.15351	0.48485	0.80492	0.8763	-0.1905	0.30952	0.5757	0.89217	-0.16461	0.038095	0.14719	0.82445	-0.27849	0.019048	0.10445	0.74123	-0.432	0.91429	0.9666	0.94083	-0.087989	0.7619	0.90703	0.9241	-0.11387
NEG	278.067	0.39	0.17965	0.59074	1.092	0.12703	0.48485	0.80492	0.94376	-0.083512	0.48485	0.73462	1.0578	0.081058	0.47619	0.67913	0.88907	-0.16963	0.066667	0.22266	0.81414	-0.29666	0.91429	0.9666	0.94206	-0.086115	0.25714	0.51611	0.8405	-0.25068
NEG	1055.78	12.05	0.17965	0.59074	0.93518	-0.096686	0.48485	0.80492	0.95242	-0.070332	0.48485	0.73462	0.96913	-0.045235	0.91429	0.96003	0.9853	-0.021363	0.11429	0.31236	1.0536	0.075322	0.60952	0.79159	1.0345	0.048969	0.7619	0.90703	1.0167	0.023872
NEG	353.856	12.88	0.17965	0.59074	0.93568	-0.095906	0.48485	0.80492	1.0414	0.058542	0.58874	0.79245	1.0215	0.030755	0.7619	0.8687	1.0361	0.051137	0.066667	0.22266	1.1073	0.14704	1	1	0.99488	-0.0074052	0.91429	0.97692	1.0142	0.020382
NEG	832.602	10.06	0.17965	0.59074	0.79943	-0.32296	0.58874	0.86881	0.89335	-0.1627	0.025974	0.11236	0.75548	-0.40453	0.17143	0.38396	0.76082	-0.39437	0.35238	0.57325	0.95171	-0.071401	0.47619	0.68896	0.85165	-0.23167	0.35238	0.62271	1.0071	0.01016
NEG	266.94	2.7	0.17965	0.59074	1.1546	0.20743	0.58874	0.86881	0.944	-0.083135	0.064935	0.21107	1.126	0.17119	0.47619	0.67913	1.0894	0.12352	0.47619	0.67517	0.9435	-0.083905	0.066667	0.25241	1.154	0.20665	0.60952	0.82434	0.9675	-0.047673
NEG	219.845	0.64	0.17965	0.59074	1.141	0.19036	0.58874	0.86881	1.0452	0.063846	0.13203	0.34269	1.1505	0.20221	0.60952	0.77559	1.028	0.039848	0.11429	0.31236	0.90093	-0.15051	0.7619	0.88776	0.9835	-0.023998	0.25714	0.51611	0.89356	-0.16236
NEG	816.536	8.5	0.17965	0.59074	0.86282	-0.21287	0.58874	0.86881	0.98348	-0.024033	0.39394	0.66372	0.82474	-0.27799	0.0095238	0.060188	0.4381	-1.1907	0.0095238	0.077098	0.50776	-0.97778	0.019048	0.11993	0.44546	-1.1666	0.038095	0.18772	0.5312	-0.91266
NEG	93.0316	2.69	0.17965	0.59074	1.1892	0.25003	0.69913	0.91075	1.0878	0.12147	0.17965	0.41666	0.83763	-0.25562	0.7619	0.8687	0.98165	-0.026712	0.25714	0.48625	0.82545	-0.27675	0.25714	0.49172	0.90238	-0.14819	0.47619	0.72996	1.1719	0.22891
NEG	997.823	12.03	0.17965	0.59074	0.92124	-0.11836	0.69913	0.91075	1.0237	0.033829	0.48485	0.73462	0.9815	-0.02694	0.17143	0.38396	1.0628	0.087818	0.066667	0.22266	1.1536	0.20617	0.47619	0.68896	1.0381	0.053989	0.47619	0.72996	1.0828	0.11476
NEG	425.875	0.27	0.17965	0.59074	0.86902	-0.20255	0.69913	0.91075	0.94471	-0.082052	0.58874	0.79245	1.0542	0.076087	0.60952	0.77559	1.0539	0.075798	0.7619	0.86812	1.2128	0.27834	0.7619	0.88776	1.1156	0.15785	0.47619	0.72996	0.9998	-0.00028895
NEG	502.848	12.12	0.17965	0.59074	0.87927	-0.18563	0.69913	0.91075	0.98575	-0.020711	0.58874	0.79245	1.0275	0.039135	0.35238	0.57216	0.89445	-0.16093	1	1	1.0173	0.024696	0.25714	0.49172	0.90738	-0.14022	0.11429	0.3578	0.87051	-0.20007
NEG	415.959	2.7	0.17965	0.59074	0.90491	-0.14415	0.69913	0.91075	1.0392	0.055537	0.81818	0.92235	1.0181	0.025923	0.066667	0.21465	0.81459	-0.29585	0.47619	0.67517	0.90019	-0.1517	0.038095	0.17695	0.78383	-0.35139	0.066667	0.26984	0.80008	-0.32178
NEG	807.582	9.28	0.17965	0.59074	1.1932	0.25482	0.69913	0.91075	1.0586	0.082091	1	1	0.9985	-0.0021719	0.91429	0.96003	1.1292	0.17536	0.7619	0.86812	0.94641	-0.079459	1	1	1.0668	0.093267	0.91429	0.97692	1.1309	0.17753
NEG	801.548	8.5	0.17965	0.59074	0.88544	-0.17553	0.81818	0.95398	0.99509	-0.0070942	0.041126	0.15468	0.67937	-0.55772	0.25714	0.48091	0.69871	-0.51724	0.25714	0.48625	0.7891	-0.34171	0.17143	0.4122	0.70215	-0.51015	0.91429	0.97692	1.0285	0.040479
NEG	770.874	12.04	0.17965	0.59074	0.89141	-0.16583	0.81818	0.95398	0.96833	-0.046435	0.13203	0.34269	0.89129	-0.16603	0.25714	0.48091	0.9619	-0.05604	0.47619	0.67517	1.0791	0.10979	0.7619	0.88776	0.99336	-0.0096057	0.91429	0.97692	1.0792	0.10999
NEG	466.923	0.35	0.17965	0.59074	1.1773	0.2355	0.81818	0.95398	0.93716	-0.093637	0.24026	0.49508	0.92925	-0.10585	0.11429	0.30644	0.78991	-0.34024	0.0095238	0.077098	0.67094	-0.57574	0.25714	0.49172	0.84288	-0.2466	0.47619	0.72996	0.85005	-0.23439
NEG	793.538	8.85	0.17965	0.59074	1.0674	0.094106	0.81818	0.95398	0.98242	-0.025582	0.39394	0.66372	1.0413	0.058412	0.17143	0.38396	1.134	0.18146	0.47619	0.67517	1.0624	0.087352	0.11429	0.33848	1.1543	0.20704	0.35238	0.62271	1.089	0.12305
NEG	562.876	12.05	0.17965	0.59074	0.92108	-0.11861	0.81818	0.95398	1.0012	0.0017551	0.58874	0.79245	1.0256	0.036506	0.11429	0.30644	1.0899	0.12418	0.019048	0.10445	1.1833	0.24278	0.17143	0.4122	1.0886	0.12242	0.25714	0.51611	1.0627	0.08767
NEG	897.566	8.97	0.17965	0.59074	0.91105	-0.13439	0.81818	0.95398	1.044	0.062075	0.58874	0.79245	1.0374	0.052981	0.066667	0.21465	0.79987	-0.32216	0.25714	0.48625	0.87796	-0.18777	0.038095	0.17695	0.76619	-0.38423	0.038095	0.18772	0.77103	-0.37514
NEG	116.016	0.31	0.17965	0.59074	0.8329	-0.26379	0.81818	0.95398	0.91644	-0.12589	0.69913	0.86627	1.012	0.017278	0.066667	0.21465	1.2303	0.29904	0.0095238	0.077098	1.4772	0.56283	0.0095238	0.10513	1.3425	0.42493	0.019048	0.12901	1.2157	0.28176
NEG	771.563	8.13	0.17965	0.59074	1.3727	0.45698	0.81818	0.95398	1.0455	0.064224	0.93723	0.96622	1.0148	0.021165	1	1	1.0096	0.013827	0.35238	0.57325	0.73553	-0.44315	0.91429	0.9666	0.96567	-0.050397	0.91429	0.97692	0.99493	-0.0073379
NEG	782.831	12.05	0.17965	0.59074	0.90429	-0.14514	0.81818	0.95398	0.9694	-0.044843	1	1	0.98325	-0.024371	0.25714	0.48091	0.94837	-0.076472	0.35238	0.57325	1.0487	0.068665	0.60952	0.79159	0.97831	-0.031629	0.60952	0.82434	0.96453	-0.052101
NEG	1044.77	12.07	0.17965	0.59074	0.92936	-0.1057	0.93723	0.98595	1.0311	0.044215	0.025974	0.11236	1.1817	0.24088	0.91429	0.96003	1.0248	0.03541	0.25714	0.48625	1.1028	0.14111	0.60952	0.79159	0.99392	-0.0088051	0.066667	0.26984	0.86726	-0.20547
NEG	795.531	8.85	0.17965	0.59074	1.1479	0.19897	0.93723	0.98595	1.0048	0.0069333	0.39394	0.66372	0.9001	-0.15184	0.91429	0.96003	0.96483	-0.05165	0.25714	0.48625	0.84054	-0.25062	0.91429	0.9666	0.96021	-0.058584	0.47619	0.72996	1.0719	0.10018
NEG	900.589	10.08	0.17965	0.59074	0.824	-0.27928	0.93723	0.98595	0.9267	-0.10983	0.48485	0.73462	0.8818	-0.18147	0.17143	0.38396	0.79992	-0.32208	0.7619	0.86812	0.97077	-0.042799	0.35238	0.58501	0.86319	-0.21224	0.60952	0.82434	0.90714	-0.1406
NEG	357.833	12.88	0.17965	0.59074	0.85911	-0.21908	1	1	0.9727	-0.039939	0.81818	0.92235	1.0043	0.0061747	0.35238	0.57216	1.0363	0.051425	0.0095238	0.077098	1.2062	0.27051	0.60952	0.79159	1.0654	0.091364	0.35238	0.62271	1.0319	0.045251
NEG	678.788	0.31	0.17965	0.59074	1.194	0.25576	1	1	0.96937	-0.044888	0.81818	0.92235	0.93717	-0.093621	0.91429	0.96003	0.97744	-0.032926	0.17143	0.3965	0.81865	-0.28869	0.7619	0.88776	1.0083	0.011962	1	1	1.043	0.060696
NEG	329.038	0.38	0.24026	0.67178	0.82393	-0.27941	0.0021645	0.073593	0.54753	-0.86898	0.0021645	0.025377	0.57966	-0.78671	0.35238	0.57216	0.78508	-0.34909	1	1	0.95285	-0.069681	0.25714	0.49172	1.4338	0.51989	0.35238	0.62271	1.3544	0.43762
NEG	527.352	5.52	0.24026	0.67178	0.75876	-0.39829	0.0021645	0.073593	0.43544	-1.1995	0.0021645	0.025377	0.57844	-0.78977	0.0095238	0.060188	0.28576	-1.8071	0.038095	0.15643	0.37662	-1.4088	0.35238	0.58501	0.65626	-0.60765	0.17143	0.44493	0.49403	-1.0173
NEG	643.111	0.38	0.24026	0.67178	0.76694	-0.38281	0.0021645	0.073593	0.44016	-1.1839	0.0021645	0.025377	0.46826	-1.0946	0.35238	0.57216	0.71541	-0.48315	0.7619	0.86812	0.93282	-0.10034	0.25714	0.49172	1.6254	0.70075	0.25714	0.51611	1.5278	0.61148
NEG	963.191	0.36	0.24026	0.67178	0.89073	-0.16694	0.004329	0.082689	0.64832	-0.62523	0.004329	0.037357	0.62418	-0.67996	0.17143	0.38396	0.78555	-0.34822	0.47619	0.67517	0.88192	-0.18128	0.35238	0.58501	1.2117	0.27701	0.47619	0.72996	1.2585	0.33175
NEG	195.811	0.47	0.24026	0.67178	1.3237	0.40454	0.008658	0.1141	1.9093	0.93306	0.025974	0.11236	1.9431	0.95835	0.91429	0.96003	0.94407	-0.083034	0.17143	0.3965	0.71322	-0.48757	0.038095	0.17695	0.49445	-1.0161	0.066667	0.26984	0.48586	-1.0414
NEG	718.003	0.42	0.24026	0.67178	0.91307	-0.13119	0.008658	0.1141	0.7476	-0.41966	0.025974	0.11236	0.78255	-0.35375	0.35238	0.57216	0.82428	-0.2788	0.47619	0.67517	0.90275	-0.14761	0.47619	0.68896	1.1026	0.14085	0.7619	0.90703	1.0533	0.074949
NEG	629.138	0.39	0.24026	0.67178	0.859	-0.21927	0.008658	0.1141	0.66015	-0.59912	0.041126	0.15468	0.72378	-0.46637	0.7619	0.8687	0.88604	-0.17456	0.7619	0.86812	1.0315	0.044704	0.25714	0.49172	1.3422	0.42456	0.35238	0.62271	1.2242	0.29181
NEG	315.042	0.41	0.24026	0.67178	0.93841	-0.091707	0.015152	0.14803	0.82416	-0.279	0.004329	0.037357	0.81904	-0.28799	0.47619	0.67913	1.0435	0.061492	0.25714	0.48625	1.112	0.1532	0.066667	0.25241	1.2662	0.34049	0.066667	0.26984	1.2741	0.34948
NEG	558.314	5.49	0.24026	0.67178	0.76917	-0.37862	0.015152	0.14803	0.66277	-0.59341	0.025974	0.11236	0.56476	-0.82429	0.0095238	0.060188	0.18689	-2.4197	0.0095238	0.077098	0.24297	-2.0411	0.019048	0.11993	0.28198	-1.8263	0.038095	0.18772	0.33092	-1.5955
NEG	531.306	5.34	0.24026	0.67178	0.9254	-0.11186	0.025974	0.18553	0.84436	-0.24407	0.0021645	0.025377	0.70171	-0.51106	0.0095238	0.060188	0.46511	-1.1043	0.038095	0.15643	0.50261	-0.99249	0.066667	0.25241	0.55085	-0.86028	0.25714	0.51611	0.66283	-0.59328
NEG	633.32	5.13	0.24026	0.67178	0.88551	-0.17542	0.025974	0.18553	0.76501	-0.38645	0.0021645	0.025377	0.65474	-0.61101	0.0095238	0.060188	0.22054	-2.1809	0.0095238	0.077098	0.24905	-2.0055	0.0095238	0.10513	0.28828	-1.7945	0.0095238	0.088959	0.33683	-1.5699
NEG	520.855	0.31	0.24026	0.67178	0.86162	-0.21487	0.025974	0.18553	0.747	-0.42083	0.24026	0.49508	0.82313	-0.28081	0.11429	0.30644	0.73302	-0.44808	0.25714	0.48625	0.85074	-0.23321	0.60952	0.79159	0.98129	-0.027254	0.35238	0.62271	0.89052	-0.16727
NEG	638.276	5.5	0.24026	0.67178	0.86411	-0.21071	0.041126	0.23619	0.73847	-0.4374	0.0021645	0.025377	0.58462	-0.77444	0.0095238	0.060188	0.16825	-2.5714	0.0095238	0.077098	0.1947	-2.3607	0.019048	0.11993	0.22783	-2.134	0.0095238	0.088959	0.28779	-1.7969
NEG	938.588	8.16	0.24026	0.67178	0.81429	-0.29638	0.041126	0.23619	0.61143	-0.70973	0.004329	0.037357	0.63038	-0.66571	0.0095238	0.060188	0.46632	-1.1006	0.066667	0.22266	0.57267	-0.80422	0.35238	0.58501	0.76267	-0.39087	0.066667	0.26984	0.73975	-0.43489
NEG	1132.66	5.12	0.24026	0.67178	1.2879	0.36504	0.041126	0.23619	0.59401	-0.75144	0.015152	0.079011	0.58564	-0.77192	0.0095238	0.060188	0.22633	-2.1435	0.0095238	0.077098	0.17573	-2.5085	0.019048	0.11993	0.38102	-1.3921	0.019048	0.12901	0.38646	-1.3716
NEG	482.315	5.34	0.24026	0.67178	0.90556	-0.14312	0.064935	0.3041	0.83638	-0.25777	0.0021645	0.025377	0.72416	-0.46562	0.0095238	0.060188	0.4183	-1.2574	0.038095	0.15643	0.46193	-1.1143	0.11429	0.33848	0.50014	-0.9996	0.17143	0.44493	0.57764	-0.79176
NEG	376.889	0.3	0.24026	0.67178	1.1286	0.17447	0.064935	0.3041	1.1739	0.23129	0.008658	0.05492	1.4677	0.55353	0.25714	0.48091	0.89221	-0.16454	0.17143	0.3965	0.79058	-0.33901	0.17143	0.4122	0.76005	-0.39583	0.038095	0.18772	0.60791	-0.71807
NEG	613.33	5.1	0.24026	0.67178	1.0862	0.11923	0.064935	0.3041	0.72584	-0.46227	0.064935	0.21107	0.76542	-0.38569	0.7619	0.8687	0.76171	-0.39268	0.47619	0.67517	0.70129	-0.51192	1	1	1.0494	0.069587	1	1	0.99516	-0.0069983
NEG	659.073	0.42	0.24026	0.67178	0.88007	-0.18431	0.064935	0.3041	0.72068	-0.47257	0.064935	0.21107	0.67487	-0.56733	0.60952	0.77559	0.88511	-0.17606	0.7619	0.86812	1.0057	0.0082462	0.25714	0.49172	1.2282	0.29651	0.25714	0.51611	1.3115	0.39126
NEG	215.05	0.36	0.24026	0.67178	0.94186	-0.086409	0.064935	0.3041	0.89722	-0.15646	0.30952	0.5757	0.94853	-0.076242	0.019048	0.093317	1.4596	0.54561	0.0095238	0.077098	1.5497	0.63202	0.0095238	0.10513	1.6268	0.70207	0.0095238	0.088959	1.5388	0.62185
NEG	276.078	0.4	0.24026	0.67178	0.87874	-0.1865	0.064935	0.3041	0.81581	-0.29369	0.48485	0.73462	0.92572	-0.11135	0.066667	0.21465	0.72601	-0.46195	0.11429	0.31236	0.82619	-0.27545	0.25714	0.49172	0.88992	-0.16826	0.066667	0.26984	0.78426	-0.35059
NEG	279.613	3.63	0.24026	0.67178	1.382	0.46678	0.093074	0.37317	2.2686	1.1818	0.0021645	0.025377	2.0426	1.0304	0.0095238	0.060188	4.9074	2.295	0.0095238	0.077098	3.5509	1.8282	0.066667	0.25241	2.1632	1.1132	0.038095	0.18772	2.4025	1.2645
NEG	706.263	5.5	0.24026	0.67178	0.94065	-0.088263	0.093074	0.37317	0.77937	-0.35963	0.0021645	0.025377	0.65454	-0.61144	0.0095238	0.060188	0.28206	-1.8259	0.0095238	0.077098	0.29985	-1.7377	0.0095238	0.10513	0.36191	-1.4663	0.0095238	0.088959	0.43093	-1.2145
NEG	681.294	6.69	0.24026	0.67178	0.80609	-0.31098	0.093074	0.37317	0.64022	-0.64337	0.015152	0.079011	0.62481	-0.6785	0.066667	0.21465	0.65946	-0.60064	0.47619	0.67517	0.81809	-0.28966	0.7619	0.88776	1.0301	0.04273	0.91429	0.97692	1.0555	0.077859
NEG	682.299	6.69	0.24026	0.67178	0.86291	-0.21271	0.093074	0.37317	0.67632	-0.56422	0.13203	0.34269	0.76976	-0.37751	0.35238	0.57216	0.76697	-0.38276	1	1	0.88881	-0.17005	0.47619	0.68896	1.134	0.18146	0.60952	0.82434	0.99637	-0.0052483
NEG	671.267	6.69	0.24026	0.67178	0.79684	-0.32764	0.093074	0.37317	0.73527	-0.44366	0.24026	0.49508	0.80518	-0.31262	0.17143	0.38396	0.71639	-0.48118	0.91429	0.95707	0.89905	-0.15353	0.7619	0.88776	0.97433	-0.037516	1	1	0.88973	-0.16856
NEG	1037.67	5.34	0.24026	0.67178	0.86287	-0.21278	0.13203	0.45254	0.77288	-0.37169	0.0021645	0.025377	0.56534	-0.82281	0.0095238	0.060188	0.24682	-2.0185	0.019048	0.10445	0.28604	-1.8057	0.038095	0.17695	0.31935	-1.6468	0.25714	0.51611	0.43658	-1.1957
NEG	602.228	3.81	0.24026	0.67178	1.3157	0.39585	0.13203	0.45254	1.5191	0.60324	0.008658	0.05492	1.9672	0.97616	0.0095238	0.060188	2.0354	1.0253	0.038095	0.15643	1.547	0.62943	0.17143	0.4122	1.3398	0.42205	0.91429	0.97692	1.0346	0.049119
NEG	605.239	7.06	0.24026	0.67178	1.2063	0.27063	0.13203	0.45254	1.49	0.57528	0.13203	0.34269	1.4075	0.49313	0.0095238	0.060188	2.2287	1.1562	0.0095238	0.077098	1.8475	0.88554	0.019048	0.11993	1.4958	0.58089	0.0095238	0.088959	1.5834	0.66304
NEG	1036.8	12.05	0.24026	0.67178	1.1151	0.15712	0.17965	0.5396	1.2165	0.28273	0.69913	0.86627	1.0687	0.09592	0.11429	0.30644	1.1829	0.24228	0.47619	0.67517	1.0608	0.085162	1	1	0.97235	-0.040446	0.47619	0.72996	1.1068	0.14636
NEG	898.578	9.39	0.24026	0.67178	0.85965	-0.21818	0.24026	0.6051	0.87236	-0.19701	0.0021645	0.025377	0.78745	-0.34475	0.11429	0.30644	0.72184	-0.47024	0.47619	0.67517	0.83969	-0.25206	0.25714	0.49172	0.82746	-0.27324	0.60952	0.82434	0.91669	-0.1255
NEG	1038.67	5.34	0.24026	0.67178	0.85717	-0.22234	0.24026	0.6051	0.83708	-0.25657	0.004329	0.037357	0.60497	-0.72507	0.0095238	0.060188	0.25965	-1.9454	0.019048	0.10445	0.30291	-1.723	0.019048	0.11993	0.31019	-1.6888	0.11429	0.3578	0.42919	-1.2203
NEG	415.194	3.43	0.24026	0.67178	0.75394	-0.40748	0.24026	0.6051	0.71168	-0.4907	0.041126	0.15468	0.5306	-0.91431	0.11429	0.30644	0.60726	-0.71962	0.60952	0.77155	0.80545	-0.31214	0.7619	0.88776	0.85327	-0.22892	0.35238	0.62271	1.1445	0.19469
NEG	475.915	0.35	0.24026	0.67178	1.1124	0.15363	0.24026	0.6051	1.1274	0.17295	0.041126	0.15468	1.2909	0.36832	0.7619	0.8687	0.89749	-0.15604	0.11429	0.31236	0.80683	-0.30967	0.11429	0.33848	0.79609	-0.32899	0.0095238	0.088959	0.69527	-0.52436
NEG	737.254	12	0.24026	0.67178	0.84929	-0.23567	0.24026	0.6051	0.80405	-0.31463	0.064935	0.21107	0.73563	-0.44295	0.11429	0.30644	0.72586	-0.46224	0.25714	0.48625	0.85466	-0.22657	0.91429	0.9666	0.90275	-0.14761	0.7619	0.90703	0.98672	-0.019293
NEG	234.001	2.7	0.24026	0.67178	1.078	0.10832	0.24026	0.6051	1.0808	0.11216	0.17965	0.41666	1.1065	0.14595	0.038095	0.14719	1.1563	0.2095	0.11429	0.31236	1.0727	0.10119	0.17143	0.4122	1.0698	0.097343	0.25714	0.51611	1.045	0.063554
NEG	424.889	0.28	0.24026	0.67178	0.87348	-0.19515	0.24026	0.6051	1.0669	0.093415	0.17965	0.41666	1.1126	0.15387	0.91429	0.96003	0.95556	-0.065588	0.35238	0.57325	1.094	0.12956	0.25714	0.49172	0.89564	-0.159	0.25714	0.51611	0.85889	-0.21946
NEG	835.567	8.71	0.24026	0.67178	0.72112	-0.47169	0.24026	0.6051	0.74768	-0.4195	0.17965	0.41666	0.74111	-0.43224	0.7619	0.8687	0.78717	-0.34526	0.7619	0.86812	1.0916	0.12644	0.91429	0.9666	1.0528	0.074245	0.7619	0.90703	1.0621	0.086987
NEG	1151.79	12.05	0.24026	0.67178	0.92173	-0.11758	0.24026	0.6051	1.0904	0.12483	0.30952	0.5757	1.0003	0.00036935	0.60952	0.77559	0.98729	-0.018458	0.60952	0.77155	1.0711	0.099127	0.60952	0.79159	0.90545	-0.14329	0.60952	0.82434	0.98703	-0.018827
NEG	407.901	12.05	0.24026	0.67178	1.0765	0.10635	0.24026	0.6051	1.0801	0.11118	0.93723	0.96622	0.99949	-0.00074296	0.60952	0.77559	1.0332	0.047108	0.60952	0.77155	0.95977	-0.059246	0.25714	0.49172	0.95656	-0.064074	0.7619	0.90703	1.0337	0.047851
NEG	638.591	10.24	0.24026	0.67178	0.93395	-0.098583	0.24026	0.6051	0.96503	-0.051353	0.93723	0.96622	0.9874	-0.01829	0.7619	0.8687	0.99112	-0.012863	0.35238	0.57325	1.0612	0.08572	0.60952	0.79159	1.027	0.038491	1	1	1.0038	0.005427
NEG	740.522	8.51	0.24026	0.67178	0.82187	-0.28302	0.30952	0.67547	0.88812	-0.17117	0.008658	0.05492	0.63841	-0.64745	0.019048	0.093317	0.53521	-0.90183	0.11429	0.31236	0.6512	-0.61882	0.11429	0.33848	0.60263	-0.73066	0.25714	0.51611	0.83835	-0.25438
NEG	550.349	5.65	0.24026	0.67178	0.82906	-0.27045	0.30952	0.67547	0.82927	-0.27009	0.025974	0.11236	0.64914	-0.6234	0.038095	0.14719	0.40178	-1.3155	0.17143	0.3965	0.48463	-1.0451	0.11429	0.33848	0.48451	-1.0454	0.17143	0.44493	0.61895	-0.69211
NEG	351.792	12.89	0.24026	0.67178	1.0591	0.082881	0.30952	0.67547	1.073	0.1016	0.064935	0.21107	1.1201	0.16363	0.60952	0.77559	1.0555	0.077964	0.7619	0.86812	0.9966	-0.004917	0.7619	0.88776	0.98375	-0.023636	0.47619	0.72996	0.94235	-0.085669
NEG	939.591	8.17	0.24026	0.67178	0.8283	-0.27177	0.30952	0.67547	0.78632	-0.34681	0.064935	0.21107	0.70929	-0.49555	0.0095238	0.060188	0.49294	-1.0205	0.038095	0.15643	0.59511	-0.74876	0.11429	0.33848	0.62689	-0.67372	0.25714	0.51611	0.69497	-0.52498
NEG	544.265	5.1	0.24026	0.67178	1.2463	0.31763	0.30952	0.67547	0.79974	-0.3224	0.093074	0.26863	0.63735	-0.64985	0.0095238	0.060188	0.23882	-2.066	0.0095238	0.077098	0.19162	-2.3837	0.0095238	0.10513	0.29862	-1.7436	0.0095238	0.088959	0.3747	-1.4162
NEG	185.88	0.15	0.24026	0.67178	0.90727	-0.14039	0.30952	0.67547	1.0765	0.10631	0.39394	0.66372	1.098	0.13487	0.7619	0.8687	0.94098	-0.087762	0.7619	0.86812	1.0372	0.052629	0.25714	0.49172	0.87414	-0.19407	0.35238	0.62271	0.857	-0.22263
NEG	420.864	0.24	0.24026	0.67178	0.9154	-0.12753	0.30952	0.67547	0.92981	-0.10499	0.81818	0.92235	1.0111	0.015871	0.47619	0.67913	0.96926	-0.045043	0.60952	0.77155	1.0588	0.08249	0.25714	0.49172	1.0424	0.059945	0.25714	0.51611	0.95866	-0.060914
NEG	146.963	0.28	0.24026	0.67178	0.8852	-0.17592	0.30952	0.67547	0.91973	-0.12072	0.93723	0.96622	1.024	0.034238	0.066667	0.21465	0.79591	-0.32933	0.25714	0.48625	0.89912	-0.15341	0.066667	0.25241	0.86537	-0.2086	0.019048	0.12901	0.77724	-0.36357
NEG	740.522	10.09	0.24026	0.67178	0.77244	-0.37251	0.39394	0.74	0.81441	-0.29617	0.004329	0.037357	0.53568	-0.90056	0.0095238	0.060188	0.3602	-1.4731	0.066667	0.22266	0.46632	-1.1006	0.11429	0.33848	0.44228	-1.177	0.25714	0.51611	0.67242	-0.57257
NEG	690.822	0.3	0.24026	0.67178	0.90283	-0.14748	0.39394	0.74	1.0834	0.11553	0.13203	0.34269	1.1995	0.26247	1	1	0.99579	-0.0060827	0.25714	0.48625	1.103	0.1414	0.7619	0.88776	0.91916	-0.12162	0.11429	0.3578	0.83015	-0.26855
NEG	600.284	5.34	0.24026	0.67178	0.86563	-0.20817	0.39394	0.74	0.87651	-0.19016	0.17965	0.41666	0.86501	-0.20922	0.11429	0.30644	0.65949	-0.60059	0.17143	0.3965	0.76185	-0.39241	0.25714	0.49172	0.7524	-0.41043	0.25714	0.51611	0.76241	-0.39137
NEG	962.826	12.03	0.24026	0.67178	1.0724	0.10088	0.39394	0.74	1.0319	0.045235	0.24026	0.49508	1.0448	0.063292	0.91429	0.96003	1.0521	0.073317	1	1	0.98108	-0.027564	1	1	1.0197	0.028082	1	1	1.007	0.010025
NEG	326.187	6.22	0.24026	0.67178	1.2339	0.30324	0.39394	0.74	1.6749	0.74406	0.39394	0.66372	1.2223	0.28962	0.038095	0.14719	1.3974	0.48275	0.47619	0.67517	1.1325	0.17951	0.47619	0.68896	0.83433	-0.26131	0.35238	0.62271	1.1432	0.19313
NEG	744.291	5.3	0.24026	0.67178	0.86802	-0.2042	0.39394	0.74	0.94438	-0.082563	0.58874	0.79245	0.9455	-0.080856	0.066667	0.21465	0.78084	-0.35691	0.25714	0.48625	0.89956	-0.15271	0.25714	0.49172	0.82682	-0.27435	0.25714	0.51611	0.82585	-0.27605
NEG	267.157	5.17	0.24026	0.67178	0.88601	-0.1746	0.39394	0.74	1.0582	0.081619	0.69913	0.86627	1.1254	0.17047	0.0095238	0.060188	2.416	1.2726	0.0095238	0.077098	2.7268	1.4472	0.038095	0.17695	2.2831	1.191	0.019048	0.12901	2.1467	1.1021
NEG	637.588	10.24	0.24026	0.67178	0.95658	-0.064048	0.39394	0.74	0.95478	-0.066764	0.81818	0.92235	0.9841	-0.023118	0.60952	0.77559	1.0316	0.044882	0.066667	0.22266	1.0784	0.10893	0.019048	0.11993	1.0805	0.11165	0.47619	0.72996	1.0483	0.068
NEG	764.52	8.44	0.24026	0.67178	1.1738	0.23124	0.39394	0.74	1.1162	0.15859	0.81818	0.92235	0.96536	-0.050862	0.019048	0.093317	1.4023	0.48783	0.17143	0.3965	1.1947	0.2566	0.17143	0.4122	1.2564	0.32924	0.038095	0.18772	1.4527	0.5387
NEG	458.865	0.29	0.24026	0.67178	1.1569	0.21029	0.48485	0.80492	1.0911	0.12582	0.093074	0.26863	1.2409	0.31144	0.35238	0.57216	0.85585	-0.22457	0.11429	0.31236	0.73977	-0.43486	0.11429	0.33848	0.78437	-0.35039	0.066667	0.26984	0.68968	-0.53601
NEG	500.854	12.12	0.24026	0.67178	1.03	0.042674	0.48485	0.80492	1.0983	0.13527	0.24026	0.49508	1.1391	0.18793	0.47619	0.67913	1.0709	0.09879	0.47619	0.67517	1.0397	0.056116	1	1	0.97503	-0.036479	0.60952	0.82434	0.94008	-0.089141
NEG	705.517	7.6	0.24026	0.67178	0.86527	-0.20878	0.48485	0.80492	1.1303	0.17666	0.93723	0.96622	0.98977	-0.014842	0.066667	0.21465	0.69975	-0.51509	0.17143	0.3965	0.80871	-0.30631	0.038095	0.17695	0.6191	-0.69175	0.17143	0.44493	0.70699	-0.50024
NEG	802.56	8.85	0.24026	0.67178	1.0865	0.11972	0.48485	0.80492	1.0455	0.064189	1	1	1.0068	0.0097201	0.7619	0.8687	1.0294	0.041784	0.7619	0.86812	0.94741	-0.077935	1	1	0.98459	-0.022404	1	1	1.0225	0.032064
NEG	1014.56	9.06	0.24026	0.67178	0.83987	-0.25176	0.48485	0.80492	0.87722	-0.18899	1	1	1.039	0.055237	0.35238	0.57216	1.1994	0.26233	0.35238	0.57325	1.4281	0.51409	0.47619	0.68896	1.3673	0.45132	0.60952	0.82434	1.1544	0.2071
NEG	1100.81	12.04	0.24026	0.67178	1.1126	0.15394	0.58874	0.86881	1.1293	0.17537	0.24026	0.49508	1.1757	0.23351	0.17143	0.38396	1.2048	0.2688	0.25714	0.48625	1.0829	0.11486	0.7619	0.88776	1.0669	0.093427	0.91429	0.97692	1.0248	0.035283
NEG	693.083	0.36	0.24026	0.67178	1.1528	0.20513	0.58874	0.86881	1.0967	0.13317	0.48485	0.73462	1.0551	0.077399	0.47619	0.67913	0.8928	-0.1636	0.066667	0.22266	0.77446	-0.36873	0.17143	0.4122	0.81407	-0.29677	0.11429	0.3578	0.84616	-0.241
NEG	601.526	9.74	0.24026	0.67178	0.88708	-0.17287	0.58874	0.86881	0.95794	-0.061999	0.58874	0.79245	1.0428	0.060413	0.7619	0.8687	1.0456	0.064284	0.11429	0.31236	1.1787	0.23716	0.35238	0.58501	1.0915	0.12628	0.91429	0.97692	1.0027	0.0038711
NEG	1122.77	12.04	0.24026	0.67178	0.96555	-0.050577	0.58874	0.86881	0.98217	-0.02595	0.58874	0.79245	1.0509	0.071632	0.35238	0.57216	1.0392	0.055482	0.17143	0.3965	1.0763	0.10606	0.35238	0.58501	1.0581	0.081433	0.91429	0.97692	0.98887	-0.01615
NEG	223.137	4.25	0.24026	0.67178	1.3146	0.39461	0.58874	0.86881	0.7583	-0.39916	0.69913	0.86627	0.90999	-0.13608	0.60952	0.77559	1.2986	0.37696	0.7619	0.86812	0.98785	-0.017642	0.47619	0.68896	1.7125	0.77613	0.60952	0.82434	1.4271	0.51304
NEG	968.575	10.07	0.24026	0.67178	0.85894	-0.21937	0.58874	0.86881	0.91048	-0.13529	0.69913	0.86627	0.90357	-0.14628	0.91429	0.96003	0.98116	-0.027436	0.7619	0.86812	1.1423	0.19193	0.91429	0.9666	1.0776	0.10786	1	1	1.0859	0.11885
NEG	141.868	12.88	0.24026	0.67178	0.92593	-0.11102	0.58874	0.86881	0.97006	-0.04386	0.81818	0.92235	1.0072	0.010298	0.35238	0.57216	0.93656	-0.094561	0.7619	0.86812	1.0115	0.01646	0.7619	0.88776	0.96547	-0.050702	0.35238	0.62271	0.9299	-0.10486
NEG	335.047	0.38	0.24026	0.67178	1.0345	0.048889	0.58874	0.86881	0.96577	-0.050255	0.93723	0.96622	1.0002	0.00033961	0.038095	0.14719	0.86302	-0.21254	0.0095238	0.077098	0.83426	-0.26143	0.038095	0.17695	0.89361	-0.16229	0.019048	0.12901	0.86281	-0.21288
NEG	572.345	5.93	0.24026	0.67178	0.83173	-0.26582	0.69913	0.91075	0.96437	-0.052339	0.041126	0.15468	0.7793	-0.35974	0.019048	0.093317	0.67455	-0.568	0.11429	0.31236	0.81102	-0.30218	0.11429	0.33848	0.69947	-0.51566	0.35238	0.62271	0.86558	-0.20826
NEG	629.556	10.24	0.24026	0.67178	1.1022	0.14033	0.69913	0.91075	0.95592	-0.065037	0.39394	0.66372	1.0729	0.10158	0.25714	0.48091	1.1353	0.18313	0.60952	0.77155	1.0301	0.042801	0.0095238	0.10513	1.1877	0.24816	0.7619	0.90703	1.0582	0.081548
NEG	936.517	8.49	0.24026	0.67178	1.0827	0.11457	0.69913	0.91075	1.1071	0.14674	0.58874	0.79245	0.97367	-0.038494	0.35238	0.57216	1.0726	0.10118	0.91429	0.95707	0.99076	-0.013391	0.7619	0.88776	0.96891	-0.045558	0.47619	0.72996	1.1017	0.13967
NEG	511.881	12.07	0.24026	0.67178	0.90342	-0.14653	0.69913	0.91075	0.93404	-0.098438	0.69913	0.86627	0.97392	-0.038127	0.7619	0.8687	1.0634	0.088717	0.35238	0.57325	1.1771	0.23524	0.35238	0.58501	1.1385	0.18716	0.7619	0.90703	1.0919	0.12684
NEG	804.566	8.85	0.24026	0.67178	1.0801	0.11118	0.69913	0.91075	1.037	0.052361	0.69913	0.86627	0.98389	-0.023431	0.7619	0.8687	1.0426	0.060225	0.91429	0.95707	0.9653	-0.050957	0.91429	0.9666	1.0055	0.0078635	0.91429	0.97692	1.0597	0.083656
NEG	1052.82	12.03	0.24026	0.67178	0.85782	-0.22126	0.69913	0.91075	1.0258	0.036765	0.81818	0.92235	1.0237	0.033796	1	1	0.98319	-0.024451	0.35238	0.57325	1.1462	0.19681	0.60952	0.79159	0.95846	-0.061216	0.91429	0.97692	0.96043	-0.058247
NEG	922.578	9.2	0.24026	0.67178	1.1061	0.14547	0.81818	0.95398	1.1048	0.14373	0.025974	0.11236	1.3287	0.41006	0.038095	0.14719	1.5606	0.64206	0.019048	0.10445	1.4109	0.4966	0.17143	0.4122	1.4126	0.49833	0.35238	0.62271	1.1745	0.23201
NEG	918.548	8.63	0.24026	0.67178	1.0847	0.11724	0.81818	0.95398	1.0341	0.048406	0.064935	0.21107	1.1859	0.24601	0.038095	0.14719	1.2551	0.32779	0.038095	0.15643	1.1571	0.21056	0.25714	0.49172	1.2137	0.27939	0.7619	0.90703	1.0583	0.081785
NEG	800.544	8.5	0.24026	0.67178	0.89438	-0.16103	0.81818	0.95398	1.0195	0.027912	0.093074	0.26863	0.68892	-0.53758	0.25714	0.48091	0.73009	-0.45386	0.47619	0.67517	0.8163	-0.29282	0.25714	0.49172	0.7161	-0.48177	0.91429	0.97692	1.0597	0.083724
NEG	946.847	12.04	0.24026	0.67178	0.9362	-0.095108	0.81818	0.95398	0.9967	-0.0047673	0.30952	0.5757	0.91972	-0.12074	0.11429	0.30644	1.0966	0.13306	0.038095	0.15643	1.1713	0.22816	0.35238	0.58501	1.1002	0.13782	0.11429	0.3578	1.1923	0.25379
NEG	204.065	2.42	0.24026	0.67178	0.59163	-0.75723	0.81818	0.95398	1.0837	0.11595	0.39394	0.66372	0.74876	-0.41743	0.7619	0.8687	1.1117	0.15282	0.17143	0.3965	1.8791	0.91005	1	1	1.0259	0.036875	0.47619	0.72996	1.4848	0.57025
NEG	104.941	12.17	0.24026	0.67178	0.96305	-0.054315	0.81818	0.95398	0.99603	-0.0057333	0.48485	0.73462	1.0569	0.079809	0.25714	0.48091	1.0966	0.133	0.019048	0.10445	1.1386	0.18731	0.17143	0.4122	1.1009	0.13873	0.47619	0.72996	1.0376	0.05319
NEG	544.021	2.69	0.24026	0.67178	1.0564	0.079222	0.81818	0.95398	0.99322	-0.0098203	0.58874	0.79245	0.96274	-0.054781	0.47619	0.67913	1.0556	0.078078	0.91429	0.95707	0.99921	-0.0011447	0.25714	0.49172	1.0628	0.087898	0.17143	0.44493	1.0965	0.13286
NEG	920.807	12.04	0.24026	0.67178	1.0624	0.087372	0.81818	0.95398	1.0268	0.038198	0.69913	0.86627	1.0007	0.00097982	0.25714	0.48091	1.085	0.11776	0.91429	0.95707	1.0213	0.030384	0.47619	0.68896	1.0567	0.079558	0.17143	0.44493	1.0843	0.11678
NEG	216.047	0.36	0.24026	0.67178	0.82768	-0.27286	0.93723	0.98595	0.91561	-0.1272	0.13203	0.34269	0.78983	-0.34039	0.47619	0.67913	1.0408	0.05773	0.35238	0.57325	1.2575	0.33059	0.25714	0.49172	1.1368	0.18493	0.11429	0.3578	1.3178	0.39812
NEG	634.305	5.12	0.24026	0.67178	1.1454	0.19591	0.93723	0.98595	0.92237	-0.11658	0.13203	0.34269	0.84101	-0.2498	0.0095238	0.060188	0.32662	-1.6143	0.0095238	0.077098	0.28514	-1.8102	0.0095238	0.10513	0.35411	-1.4977	0.0095238	0.088959	0.38836	-1.3645
NEG	294.182	6.28	0.24026	0.67178	0.79986	-0.32218	0.93723	0.98595	0.96068	-0.05787	0.58874	0.79245	0.87963	-0.18504	0.47619	0.67913	1.2041	0.26797	0.11429	0.31236	1.5054	0.59015	0.35238	0.58501	1.2534	0.32584	0.35238	0.62271	1.3689	0.45301
NEG	154.061	0.32	0.24026	0.67178	1.1435	0.1935	0.93723	0.98595	0.96899	-0.045443	0.81818	0.92235	0.97767	-0.032577	0.35238	0.57216	0.80253	-0.31738	0.11429	0.31236	0.70179	-0.51088	0.25714	0.49172	0.82821	-0.27194	0.17143	0.44493	0.82085	-0.2848
NEG	762.507	8.69	0.24026	0.67178	1.5875	0.66675	0.93723	0.98595	1.1294	0.1755	0.81818	0.92235	1.062	0.086751	0.35238	0.57216	1.3169	0.39711	0.60952	0.77155	0.82953	-0.26964	0.7619	0.88776	1.166	0.2216	0.35238	0.62271	1.24	0.31036
NEG	877.835	12.04	0.24026	0.67178	0.95463	-0.066989	1	1	1.0037	0.0053107	0.58874	0.79245	1.028	0.039847	0.35238	0.57216	1.0568	0.079707	0.11429	0.31236	1.107	0.1467	0.47619	0.68896	1.0529	0.074396	0.60952	0.82434	1.028	0.03986
NEG	330.042	0.38	0.30952	0.73286	0.84187	-0.24833	0.0021645	0.073593	0.53076	-0.91386	0.004329	0.037357	0.54182	-0.88412	0.47619	0.67913	0.79782	-0.32586	1	1	0.94768	-0.077531	0.25714	0.49172	1.5032	0.588	0.25714	0.51611	1.4725	0.55825
NEG	352.022	0.36	0.30952	0.73286	0.92097	-0.11877	0.0021645	0.073593	0.65391	-0.61284	0.008658	0.05492	0.69385	-0.52731	0.17143	0.38396	0.76662	-0.38341	0.60952	0.77155	0.83241	-0.26464	0.7619	0.88776	1.1724	0.22943	0.7619	0.90703	1.1049	0.1439
NEG	234.868	0.38	0.30952	0.73286	1.0802	0.11129	0.0021645	0.073593	1.4542	0.54021	0.025974	0.11236	1.2975	0.37574	0.25714	0.48091	0.81671	-0.2921	0.25714	0.48625	0.75608	-0.40339	0.11429	0.33848	0.56163	-0.83231	0.17143	0.44493	0.62945	-0.66784
NEG	839.563	8.6	0.30952	0.73286	0.84249	-0.24728	0.0021645	0.073593	0.77169	-0.37391	0.064935	0.21107	0.77359	-0.37035	0.11429	0.30644	0.82037	-0.28566	0.91429	0.95707	0.97375	-0.038383	0.35238	0.58501	1.0631	0.088253	0.7619	0.90703	1.0605	0.084696
NEG	94.9252	0.32	0.30952	0.73286	1.1349	0.18257	0.004329	0.082689	1.2785	0.35445	0.0021645	0.025377	1.3386	0.42074	0.11429	0.30644	0.78606	-0.34729	0.019048	0.10445	0.69262	-0.52986	0.0095238	0.10513	0.61483	-0.70173	0.0095238	0.088959	0.58722	-0.76803
NEG	1073.63	5.14	0.30952	0.73286	0.84111	-0.24963	0.004329	0.082689	0.55198	-0.85731	0.0021645	0.025377	0.42632	-1.23	0.0095238	0.060188	0.089337	-3.4846	0.0095238	0.077098	0.10621	-3.235	0.0095238	0.10513	0.16185	-2.6273	0.0095238	0.088959	0.20955	-2.2546
NEG	1087.69	5.5	0.30952	0.73286	0.77431	-0.36901	0.004329	0.082689	0.43526	-1.2	0.0021645	0.025377	0.29319	-1.7701	0.0095238	0.060188	0.029772	-5.0699	0.0095238	0.077098	0.038449	-4.7009	0.019048	0.11993	0.068399	-3.8699	0.0095238	0.088959	0.10154	-3.2998
NEG	532.894	0.33	0.30952	0.73286	1.1442	0.19428	0.004329	0.082689	1.3567	0.44015	0.015152	0.079011	1.369	0.45308	0.47619	0.67913	0.85187	-0.23129	0.17143	0.3965	0.74454	-0.42557	0.019048	0.11993	0.62788	-0.67144	0.019048	0.12901	0.62228	-0.68437
NEG	554.381	6.16	0.30952	0.73286	0.72414	-0.46566	0.004329	0.082689	0.43295	-1.2077	0.041126	0.15468	0.72536	-0.46323	0.17143	0.38396	0.33825	-1.5638	0.25714	0.48625	0.46711	-1.0982	0.35238	0.58501	0.78127	-0.3561	0.25714	0.51611	0.46632	-1.1006
NEG	1088.7	5.5	0.30952	0.73286	0.8174	-0.29088	0.008658	0.1141	0.48413	-1.0465	0.0021645	0.025377	0.30761	-1.7008	0.0095238	0.060188	0.039632	-4.6572	0.0095238	0.077098	0.048486	-4.3663	0.019048	0.11993	0.081864	-3.6106	0.0095238	0.088959	0.12884	-2.9563
NEG	154.913	0.38	0.30952	0.73286	1.157	0.21044	0.008658	0.1141	1.499	0.58401	0.008658	0.05492	1.4675	0.55338	0.47619	0.67913	0.87759	-0.18838	0.11429	0.31236	0.75848	-0.39882	0.019048	0.11993	0.58545	-0.77239	0.019048	0.12901	0.59801	-0.74177
NEG	828.939	0.35	0.30952	0.73286	0.91405	-0.12966	0.008658	0.1141	0.73699	-0.44028	0.008658	0.05492	0.73216	-0.44977	0.0095238	0.060188	0.6506	-0.62015	0.019048	0.10445	0.71178	-0.4905	0.60952	0.79159	0.88278	-0.17987	0.35238	0.62271	0.88861	-0.17038
NEG	313.065	0.38	0.30952	0.73286	0.95931	-0.059928	0.008658	0.1141	0.83611	-0.25823	0.015152	0.079011	0.86078	-0.21629	0.60952	0.77559	0.91842	-0.12277	0.91429	0.95707	0.95738	-0.062842	0.25714	0.49172	1.0984	0.13546	0.35238	0.62271	1.067	0.093521
NEG	448.98	0.4	0.30952	0.73286	0.8671	-0.20573	0.008658	0.1141	0.77741	-0.36326	0.015152	0.079011	0.71484	-0.48431	0.038095	0.14719	0.70101	-0.51249	0.25714	0.48625	0.80845	-0.30677	0.7619	0.88776	0.90173	-0.14924	0.7619	0.90703	0.98065	-0.028187
NEG	666.095	0.38	0.30952	0.73286	0.84925	-0.23575	0.008658	0.1141	0.56417	-0.8258	0.015152	0.079011	0.57147	-0.80724	0.066667	0.21465	0.67304	-0.57124	0.25714	0.48625	0.79251	-0.3355	0.47619	0.68896	1.193	0.25456	0.47619	0.72996	1.1777	0.236
NEG	379.897	0.28	0.30952	0.73286	0.96907	-0.045334	0.008658	0.1141	1.1919	0.25332	0.093074	0.26863	1.3443	0.42685	0.60952	0.77559	1.0351	0.049813	0.91429	0.95707	1.0682	0.095147	0.25714	0.49172	0.86844	-0.20351	0.11429	0.3578	0.77002	-0.37704
NEG	299.259	6.87	0.30952	0.73286	0.85106	-0.23266	0.015152	0.14803	0.62213	-0.68471	0.025974	0.11236	0.73152	-0.45102	0.019048	0.093317	0.54763	-0.86874	0.038095	0.15643	0.64346	-0.63608	0.91429	0.9666	0.88024	-0.18402	0.066667	0.26984	0.74861	-0.41771
NEG	840.61	10.02	0.30952	0.73286	1.0651	0.091017	0.015152	0.14803	0.48667	-1.039	0.24026	0.49508	1.0952	0.13114	0.17143	0.38396	0.76333	-0.38962	0.25714	0.48625	0.71666	-0.48064	0.17143	0.4122	1.5685	0.64936	0.25714	0.51611	0.697	-0.52077
NEG	635.336	5.5	0.30952	0.73286	0.88498	-0.17628	0.025974	0.18553	0.69105	-0.53314	0.015152	0.079011	0.6537	-0.61329	0.0095238	0.060188	0.18428	-2.4401	0.0095238	0.077098	0.20823	-2.2638	0.0095238	0.10513	0.26666	-1.9069	0.0095238	0.088959	0.2819	-1.8268
NEG	114.025	0.33	0.30952	0.73286	0.93548	-0.096225	0.025974	0.18553	0.78309	-0.35276	0.025974	0.11236	0.77751	-0.36307	0.11429	0.30644	0.84854	-0.23695	0.17143	0.3965	0.90706	-0.14073	0.35238	0.58501	1.0836	0.11581	0.47619	0.72996	1.0914	0.12612
NEG	447.133	4.28	0.30952	0.73286	0.93936	-0.090251	0.025974	0.18553	0.78292	-0.35306	0.24026	0.49508	0.83975	-0.25197	0.60952	0.77559	0.87924	-0.18567	1	1	0.936	-0.095421	0.35238	0.58501	1.123	0.16739	1	1	1.047	0.066297
NEG	151.11	3.63	0.30952	0.73286	0.69224	-0.53066	0.041126	0.23619	0.5742	-0.80038	0.041126	0.15468	0.51791	-0.94922	0.60952	0.77559	0.72391	-0.46613	0.47619	0.67517	1.0457	0.06453	0.47619	0.68896	1.2607	0.33426	0.17143	0.44493	1.3977	0.48309
NEG	196.105	3.63	0.30952	0.73286	0.6088	-0.71596	0.041126	0.23619	0.5461	-0.87275	0.093074	0.26863	0.5147	-0.95818	0.47619	0.67913	0.72277	-0.46838	0.25714	0.48625	1.1872	0.24758	0.35238	0.58501	1.3235	0.40437	0.17143	0.44493	1.4043	0.4898
NEG	561.38	7.47	0.30952	0.73286	1.413	0.49874	0.041126	0.23619	1.6774	0.74624	0.58874	0.79245	1.2349	0.30441	0.0095238	0.060188	3.0307	1.5996	0.038095	0.15643	2.1449	1.1009	0.019048	0.11993	1.8067	0.85339	0.019048	0.12901	2.4541	1.2952
NEG	1062.68	5.37	0.30952	0.73286	0.81481	-0.29546	0.064935	0.3041	0.63041	-0.66565	0.0021645	0.025377	0.43532	-1.1999	0.0095238	0.060188	0.13171	-2.9246	0.0095238	0.077098	0.16164	-2.6291	0.019048	0.11993	0.20893	-2.2589	0.0095238	0.088959	0.30256	-1.7247
NEG	700.303	5.12	0.30952	0.73286	0.90683	-0.14109	0.064935	0.3041	0.80756	-0.30835	0.015152	0.079011	0.79296	-0.33468	0.0095238	0.060188	0.27778	-1.848	0.0095238	0.077098	0.30632	-1.7069	0.0095238	0.10513	0.34397	-1.5396	0.0095238	0.088959	0.35031	-1.5133
NEG	285.205	4.73	0.30952	0.73286	0.87477	-0.19303	0.064935	0.3041	0.78255	-0.35375	0.025974	0.11236	0.73758	-0.43912	0.91429	0.96003	0.9715	-0.04172	0.7619	0.86812	1.1106	0.15131	0.91429	0.9666	1.2415	0.31203	0.7619	0.90703	1.3171	0.3974
NEG	424.801	12.89	0.30952	0.73286	1.0573	0.080375	0.064935	0.3041	1.1117	0.15275	0.041126	0.15468	1.1284	0.17431	0.91429	0.96003	0.99785	-0.0031089	0.25714	0.48625	0.94378	-0.083484	0.11429	0.33848	0.8976	-0.15586	0.038095	0.18772	0.88428	-0.17742
NEG	601.526	10.35	0.30952	0.73286	1.0371	0.052576	0.064935	0.3041	1.1023	0.14051	0.48485	0.73462	1.0526	0.073969	0.038095	0.14719	1.133	0.18021	0.25714	0.48625	1.0925	0.12764	0.7619	0.88776	1.0279	0.039702	0.25714	0.51611	1.0764	0.10624
NEG	595.853	12.09	0.30952	0.73286	0.92618	-0.11063	0.064935	0.3041	0.86209	-0.21409	1	1	1.0126	0.01802	0.066667	0.21465	0.84025	-0.25111	0.47619	0.67517	0.90722	-0.14048	0.91429	0.9666	0.97467	-0.037018	0.11429	0.3578	0.82982	-0.26913
NEG	188.045	0.4	0.30952	0.73286	0.80169	-0.31887	0.093074	0.37317	0.7079	-0.49837	0.24026	0.49508	0.83123	-0.26668	0.038095	0.14719	0.64769	-0.62663	0.25714	0.48625	0.8079	-0.30775	0.91429	0.9666	0.91494	-0.12825	0.25714	0.51611	0.77919	-0.35994
NEG	128.035	0.38	0.30952	0.73286	0.891	-0.16651	0.093074	0.37317	0.83174	-0.2658	0.81818	0.92235	0.9755	-0.035787	0.17143	0.38396	0.76662	-0.38341	0.60952	0.77155	0.86041	-0.21691	0.35238	0.58501	0.92171	-0.11762	0.17143	0.44493	0.78588	-0.34763
NEG	634.332	5.5	0.30952	0.73286	0.89711	-0.15665	0.13203	0.45254	0.7524	-0.41042	0.004329	0.037357	0.6624	-0.59422	0.0095238	0.060188	0.2056	-2.2821	0.0095238	0.077098	0.22918	-2.1254	0.019048	0.11993	0.27326	-1.8717	0.0095238	0.088959	0.31039	-1.6879
NEG	718.289	5.95	0.30952	0.73286	0.85765	-0.22154	0.13203	0.45254	0.8129	-0.29885	0.093074	0.26863	0.75035	-0.41436	0.038095	0.14719	0.5329	-0.90806	0.066667	0.22266	0.62135	-0.68652	0.17143	0.4122	0.65556	-0.60921	0.17143	0.44493	0.7102	-0.4937
NEG	715.065	0.35	0.30952	0.73286	1.1562	0.20939	0.13203	0.45254	1.1986	0.26137	0.13203	0.34269	1.1837	0.24334	0.11429	0.30644	0.71457	-0.48486	0.0095238	0.077098	0.61803	-0.69424	0.0095238	0.10513	0.59616	-0.74623	0.019048	0.12901	0.60366	-0.7282
NEG	304.912	12.39	0.30952	0.73286	1.0455	0.064136	0.13203	0.45254	1.0828	0.11477	0.93723	0.96622	1.0098	0.014115	0.91429	0.96003	1.0015	0.0021223	0.60952	0.77155	0.95793	-0.062014	0.35238	0.58501	0.92489	-0.11265	0.7619	0.90703	0.99172	-0.011993
NEG	172.096	2.34	0.30952	0.73286	0.65518	-0.61004	0.17965	0.5396	0.71174	-0.49057	0.004329	0.037357	0.40469	-1.3051	0.35238	0.57216	0.7101	-0.4939	1	1	1.0838	0.11614	1	1	0.9977	-0.0033246	0.47619	0.72996	1.7547	0.81121
NEG	305.931	2.69	0.30952	0.73286	1.0744	0.10352	0.17965	0.5396	1.1218	0.16582	0.004329	0.037357	1.1869	0.24718	0.066667	0.21465	1.1901	0.25112	0.17143	0.3965	1.1077	0.14759	0.60952	0.79159	1.0609	0.085301	0.7619	0.90703	1.0027	0.003938
NEG	1026.64	5.34	0.30952	0.73286	0.90273	-0.14763	0.17965	0.5396	0.84769	-0.2384	0.004329	0.037357	0.71502	-0.48395	0.019048	0.093317	0.37792	-1.4038	0.066667	0.22266	0.41864	-1.2562	0.17143	0.4122	0.44583	-1.1654	0.25714	0.51611	0.52855	-0.91989
NEG	994.12	0.4	0.30952	0.73286	0.90115	-0.15017	0.17965	0.5396	0.84359	-0.24539	0.041126	0.15468	0.80448	-0.31387	0.60952	0.77559	0.9052	-0.14368	1	1	1.0045	0.006483	0.60952	0.79159	1.073	0.10171	0.35238	0.62271	1.1252	0.17019
NEG	808.549	8.58	0.30952	0.73286	0.81148	-0.30137	0.17965	0.5396	0.76469	-0.38705	0.093074	0.26863	0.6733	-0.57068	0.11429	0.30644	0.68569	-0.54438	0.25714	0.48625	0.84498	-0.24301	0.11429	0.33848	0.89668	-0.15733	0.91429	0.97692	1.0184	0.026305
NEG	151.923	12.88	0.30952	0.73286	1.0394	0.055692	0.17965	0.5396	1.0755	0.10506	0.13203	0.34269	1.0773	0.10737	0.91429	0.96003	1.0094	0.01344	0.47619	0.67517	0.97114	-0.042252	0.25714	0.49172	0.93847	-0.091625	0.11429	0.3578	0.93697	-0.093927
NEG	265.954	12.05	0.30952	0.73286	1.0699	0.097411	0.17965	0.5396	1.1123	0.15353	0.30952	0.5757	1.0632	0.088422	0.17143	0.38396	1.1222	0.16636	0.47619	0.67517	1.049	0.068947	0.7619	0.88776	1.0089	0.012828	0.35238	0.62271	1.0555	0.077936
NEG	380.256	4.9	0.30952	0.73286	0.78247	-0.3539	0.17965	0.5396	1.2905	0.36788	0.81818	0.92235	0.92611	-0.11075	0.60952	0.77559	0.88001	-0.18441	1	1	1.1247	0.16948	0.11429	0.33848	0.68193	-0.55229	0.60952	0.82434	0.95022	-0.073664
NEG	477.281	5.11	0.30952	0.73286	1.3291	0.41049	0.24026	0.6051	0.75665	-0.40231	0.015152	0.079011	0.55722	-0.84367	0.0095238	0.060188	0.18242	-2.4547	0.0095238	0.077098	0.13725	-2.8651	0.0095238	0.10513	0.24109	-2.0524	0.0095238	0.088959	0.32737	-1.611
NEG	479.296	5.47	0.30952	0.73286	1.3473	0.43006	0.24026	0.6051	0.83029	-0.26832	0.025974	0.11236	0.6734	-0.57046	0.0095238	0.060188	0.27882	-1.8426	0.0095238	0.077098	0.20695	-2.2727	0.0095238	0.10513	0.33581	-1.5743	0.019048	0.12901	0.41404	-1.2722
NEG	879.594	9.05	0.30952	0.73286	0.72887	-0.45628	0.24026	0.6051	0.72827	-0.45745	0.69913	0.86627	0.83718	-0.25638	0.47619	0.67913	1.313	0.39282	0.25714	0.48625	1.8014	0.8491	0.25714	0.49172	1.8028	0.85027	0.25714	0.51611	1.5683	0.6492
NEG	159.977	12.17	0.30952	0.73286	0.90011	-0.15182	0.24026	0.6051	1.1238	0.16836	0.81818	0.92235	1.0468	0.065933	1	1	0.97618	-0.034783	0.7619	0.86812	1.0845	0.11704	0.25714	0.49172	0.86866	-0.20314	0.35238	0.62271	0.93257	-0.10072
NEG	815.819	12.04	0.30952	0.73286	0.93508	-0.096836	0.24026	0.6051	1.0787	0.1093	0.81818	0.92235	1.0806	0.11183	0.91429	0.96003	0.99469	-0.0076811	0.47619	0.67517	1.0637	0.089155	0.47619	0.68896	0.92212	-0.11698	0.60952	0.82434	0.9205	-0.11951
NEG	537.234	3.06	0.30952	0.73286	0.72433	-0.46527	0.30952	0.67547	1.1689	0.2252	0.13203	0.34269	0.74445	-0.42574	0.019048	0.093317	4.5444	2.1841	0.019048	0.10445	6.2738	2.6494	0.066667	0.25241	3.8876	1.9589	0.019048	0.12901	6.1043	2.6098
NEG	640.819	0.31	0.30952	0.73286	0.91153	-0.13365	0.30952	0.67547	0.89204	-0.16482	0.24026	0.49508	0.89118	-0.16621	0.11429	0.30644	0.77266	-0.37209	0.35238	0.57325	0.84766	-0.23844	0.11429	0.33848	0.86618	-0.20726	0.11429	0.3578	0.86701	-0.20588
NEG	489.887	0.32	0.30952	0.73286	1.1042	0.14296	0.30952	0.67547	0.88459	-0.17692	0.30952	0.5757	0.90654	-0.14156	0.17143	0.38396	0.80191	-0.31848	0.019048	0.10445	0.72626	-0.46144	0.35238	0.58501	0.90654	-0.14156	0.25714	0.51611	0.88459	-0.17692
NEG	383.188	7.57	0.30952	0.73286	0.5717	-0.80667	0.30952	0.67547	0.61088	-0.71103	0.48485	0.73462	0.5752	-0.79788	0.25714	0.48091	1.3968	0.48213	0.019048	0.10445	2.4432	1.2888	0.019048	0.11993	2.2865	1.1932	0.0095238	0.088959	2.4284	1.28
NEG	564.931	12.03	0.30952	0.73286	0.94528	-0.081193	0.30952	0.67547	0.97689	-0.033736	1	1	0.98417	-0.023025	0.91429	0.96003	0.96858	-0.046056	0.60952	0.77155	1.0247	0.035137	0.60952	0.79159	0.9915	-0.01232	1	1	0.98416	-0.023031
NEG	516.866	0.31	0.30952	0.73286	0.8043	-0.31419	0.39394	0.74	1.0732	0.10189	0.064935	0.21107	1.2538	0.32627	0.11429	0.30644	0.74401	-0.42661	0.35238	0.57325	0.92503	-0.11243	0.0095238	0.10513	0.69327	-0.52851	0.0095238	0.088959	0.59342	-0.75288
NEG	313.237	5.25	0.30952	0.73286	0.76153	-0.39303	0.39394	0.74	0.89154	-0.16563	0.17965	0.41666	0.75799	-0.39976	1	1	1.0267	0.037958	0.25714	0.48625	1.3482	0.43099	0.47619	0.68896	1.1516	0.20359	0.25714	0.51611	1.3545	0.43772
NEG	922.492	8.63	0.30952	0.73286	1.0213	0.03035	0.39394	0.74	1.0079	0.01141	0.39394	0.66372	1.0238	0.033958	0.25714	0.48091	1.1376	0.18605	0.25714	0.48625	1.114	0.1557	0.25714	0.49172	1.1287	0.17464	0.25714	0.51611	1.1112	0.15209
NEG	1170.77	12.05	0.30952	0.73286	1.0702	0.097902	0.39394	0.74	1.0267	0.038016	0.48485	0.73462	0.92245	-0.11646	1	1	1.0705	0.098323	0.60952	0.77155	1.0003	0.00042049	0.25714	0.49172	1.0427	0.060307	0.7619	0.90703	1.1605	0.21478
NEG	538.873	0.29	0.30952	0.73286	0.83829	-0.25447	0.39394	0.74	0.9099	-0.13622	0.58874	0.79245	1.0542	0.076114	0.47619	0.67913	1.096	0.13227	0.0095238	0.077098	1.3074	0.38674	0.17143	0.4122	1.2045	0.26849	0.7619	0.90703	1.0397	0.056152
NEG	696.787	12.12	0.30952	0.73286	0.90929	-0.13718	0.39394	0.74	1.0973	0.13392	0.58874	0.79245	1.099	0.13619	0.60952	0.77559	0.93654	-0.094585	0.60952	0.77155	1.03	0.0426	0.35238	0.58501	0.85352	-0.22851	0.25714	0.51611	0.85218	-0.23078
NEG	827.563	8.53	0.30952	0.73286	1.0804	0.11159	0.39394	0.74	1.1213	0.16521	0.58874	0.79245	0.95491	-0.066569	0.35238	0.57216	0.89171	-0.16535	0.17143	0.3965	0.82534	-0.27693	0.17143	0.4122	0.79523	-0.33056	0.17143	0.44493	0.93382	-0.098777
NEG	998.826	12.03	0.30952	0.73286	1.1217	0.16567	0.39394	0.74	1.1061	0.14544	0.58874	0.79245	0.95741	-0.062796	0.35238	0.57216	1.12	0.16344	1	1	0.99845	-0.0022378	0.91429	0.9666	1.0125	0.017993	0.038095	0.18772	1.1698	0.22623
NEG	250.852	12.89	0.30952	0.73286	0.93846	-0.091637	0.39394	0.74	1.0592	0.08294	0.69913	0.86627	1.0644	0.089984	0.91429	0.96003	1.0326	0.046258	0.17143	0.3965	1.1003	0.13789	0.7619	0.88776	0.97489	-0.036682	0.60952	0.82434	0.97015	-0.043727
NEG	263.868	0.15	0.30952	0.73286	0.94295	-0.084746	0.39394	0.74	0.96463	-0.051946	0.93723	0.96622	1.0143	0.020499	0.17143	0.38396	0.9315	-0.10238	0.60952	0.77155	0.98785	-0.017632	0.91429	0.9666	0.96565	-0.050432	0.47619	0.72996	0.91835	-0.12288
NEG	309.174	12.19	0.30952	0.73286	1.0537	0.075524	0.39394	0.74	1.0312	0.044353	0.93723	0.96622	0.98622	-0.020016	0.35238	0.57216	1.106	0.14538	0.17143	0.3965	1.0496	0.069858	0.17143	0.4122	1.0725	0.10103	0.019048	0.12901	1.1215	0.1654
NEG	831.594	9.37	0.30952	0.73286	0.84993	-0.23459	0.48485	0.80492	0.89827	-0.15477	0.13203	0.34269	0.77801	-0.36214	0.17143	0.38396	0.74046	-0.43351	0.47619	0.67517	0.8712	-0.19892	0.35238	0.58501	0.82431	-0.27874	0.60952	0.82434	0.95174	-0.071367
NEG	280.818	12.15	0.30952	0.73286	0.87691	-0.1895	0.48485	0.80492	0.94153	-0.086922	0.24026	0.49508	1.1211	0.16492	0.066667	0.21465	1.232	0.30095	0.019048	0.10445	1.4049	0.49045	0.17143	0.4122	1.3085	0.38787	0.35238	0.62271	1.0989	0.13603
NEG	268.986	12.25	0.30952	0.73286	1.0375	0.053063	0.48485	0.80492	1.0641	0.089566	0.39394	0.66372	0.98707	-0.018776	0.11429	0.30644	1.1616	0.21613	0.0095238	0.077098	1.1197	0.16307	0.17143	0.4122	1.0917	0.12656	0.11429	0.3578	1.1768	0.23491
NEG	456.004	0.42	0.30952	0.73286	0.83983	-0.25183	0.48485	0.80492	0.8971	-0.15665	0.81818	0.92235	1.0721	0.1005	0.11429	0.30644	0.69837	-0.51794	0.25714	0.48625	0.83156	-0.26611	0.11429	0.33848	0.77847	-0.36129	0.019048	0.12901	0.65138	-0.61844
NEG	1172.64	5.34	0.30952	0.73286	0.91874	-0.12226	0.58874	0.86881	0.94032	-0.088769	0.008658	0.05492	0.77668	-0.36461	0.0095238	0.060188	0.45332	-1.1414	0.019048	0.10445	0.49342	-1.0191	0.019048	0.11993	0.48209	-1.0526	0.11429	0.3578	0.58367	-0.77677
NEG	295.227	5.08	0.30952	0.73286	1.3842	0.46908	0.58874	0.86881	1.128	0.1738	0.015152	0.079011	0.64833	-0.6252	0.25714	0.48091	0.61603	-0.69893	0.25714	0.48625	0.44503	-1.168	0.11429	0.33848	0.54611	-0.87273	0.60952	0.82434	0.95017	-0.073739
NEG	722.459	6.88	0.30952	0.73286	0.53067	-0.91412	0.58874	0.86881	0.73036	-0.45332	0.24026	0.49508	0.60538	-0.72409	0.35238	0.57216	0.52389	-0.93266	1	1	0.98723	-0.018537	0.11429	0.33848	0.71731	-0.47934	0.91429	0.97692	0.8654	-0.20856
NEG	184.898	12.23	0.30952	0.73286	1.074	0.10301	0.58874	0.86881	1.0992	0.13648	0.48485	0.73462	1.079	0.10966	0.17143	0.38396	1.0974	0.13414	0.91429	0.95707	1.0218	0.031139	0.7619	0.88776	0.99838	-0.0023324	0.91429	0.97692	1.0171	0.024482
NEG	658.888	12.03	0.30952	0.73286	0.94741	-0.077941	0.58874	0.86881	0.97008	-0.043825	0.69913	0.86627	0.97606	-0.034955	0.60952	0.77559	1.0412	0.0583	0.066667	0.22266	1.099	0.13624	0.11429	0.33848	1.0734	0.10213	0.35238	0.62271	1.0668	0.093255
NEG	311.168	5.66	0.30952	0.73286	1.1591	0.21306	0.58874	0.86881	1.7178	0.78053	0.81818	0.92235	1.1357	0.18354	0.47619	0.67913	1.1909	0.2521	0.7619	0.86812	1.0274	0.039044	0.47619	0.68896	0.69331	-0.52842	0.47619	0.72996	1.0487	0.068568
NEG	600.531	9.74	0.30952	0.73286	0.94161	-0.086798	0.69913	0.91075	1.0336	0.04766	0.13203	0.34269	1.0573	0.080333	0.17143	0.38396	1.0787	0.1093	0.066667	0.22266	1.1456	0.19609	0.47619	0.68896	1.0436	0.061636	0.7619	0.90703	1.0203	0.028963
NEG	855.594	9.2	0.30952	0.73286	1.0794	0.11025	0.69913	0.91075	1.0191	0.027269	0.13203	0.34269	1.2428	0.31363	0.17143	0.38396	1.4734	0.55915	0.17143	0.3965	1.365	0.44891	0.11429	0.33848	1.4458	0.53188	0.35238	0.62271	1.1855	0.24552
NEG	248.961	9.85	0.30952	0.73286	1.1197	0.16306	0.69913	0.91075	1.0494	0.069499	0.17965	0.41666	1.1155	0.15768	0.35238	0.57216	1.1731	0.23038	0.7619	0.86812	1.0478	0.067317	0.60952	0.79159	1.118	0.16088	0.60952	0.82434	1.0517	0.072694
NEG	759.56	8.28	0.30952	0.73286	0.87594	-0.1911	0.69913	0.91075	0.89926	-0.15318	0.24026	0.49508	0.82475	-0.27796	0.11429	0.30644	0.74241	-0.42972	0.60952	0.77155	0.84756	-0.23862	0.17143	0.4122	0.82557	-0.27653	1	1	0.90016	-0.15175
NEG	164.877	12.3	0.30952	0.73286	0.95777	-0.062245	0.69913	0.91075	1.0049	0.0070709	0.48485	0.73462	1.0348	0.049327	0.7619	0.8687	1.0116	0.016634	0.35238	0.57325	1.0562	0.078879	0.91429	0.9666	1.0067	0.009563	0.47619	0.72996	0.97759	-0.032693
NEG	566.866	0.32	0.30952	0.73286	1.0868	0.12009	0.69913	0.91075	0.95281	-0.069737	0.93723	0.96622	0.94239	-0.085611	0.11429	0.30644	0.85118	-0.23247	0.019048	0.10445	0.7832	-0.35255	0.47619	0.68896	0.89333	-0.16273	0.0095238	0.088959	0.90322	-0.14685
NEG	803.563	8.85	0.30952	0.73286	1.0895	0.12369	0.69913	0.91075	1.0409	0.057825	0.93723	0.96622	1.0104	0.014898	0.91429	0.96003	1.0343	0.048711	0.7619	0.86812	0.94936	-0.074979	0.91429	0.9666	0.9937	-0.0091133	1	1	1.0237	0.033813
NEG	805.578	9.29	0.30952	0.73286	1.1264	0.17171	0.69913	0.91075	1.0449	0.063419	1	1	0.96792	-0.047037	0.7619	0.8687	1.0365	0.051721	0.7619	0.86812	0.9202	-0.11999	0.91429	0.9666	0.99192	-0.011698	0.91429	0.97692	1.0709	0.098758
NEG	923.581	9.2	0.30952	0.73286	1.0597	0.083589	0.81818	0.95398	0.98646	-0.019673	0.17965	0.41666	1.2149	0.28079	0.038095	0.14719	1.466	0.55189	0.066667	0.22266	1.3835	0.4683	0.066667	0.25241	1.4861	0.57156	0.25714	0.51611	1.2067	0.2711
NEG	370.872	0.3	0.30952	0.73286	0.84933	-0.23561	0.81818	0.95398	1.0243	0.034651	0.24026	0.49508	1.1631	0.21801	0.91429	0.96003	0.9585	-0.061155	0.60952	0.77155	1.1285	0.17445	0.47619	0.68896	0.93575	-0.095806	0.17143	0.44493	0.82407	-0.27917
NEG	483.326	5.33	0.30952	0.73286	0.78628	-0.34689	0.81818	0.95398	0.92912	-0.10606	0.24026	0.49508	0.81877	-0.28846	0.038095	0.14719	0.51183	-0.96625	0.17143	0.3965	0.65096	-0.61936	0.019048	0.11993	0.55088	-0.86019	0.11429	0.3578	0.62512	-0.67779
NEG	866.584	8.59	0.30952	0.73286	0.79073	-0.33875	0.81818	0.95398	0.87336	-0.19536	0.24026	0.49508	0.75725	-0.40116	0.066667	0.21465	0.72475	-0.46444	0.60952	0.77155	0.91656	-0.1257	0.35238	0.58501	0.82984	-0.26909	0.7619	0.90703	0.95708	-0.063286
NEG	285.134	3.94	0.30952	0.73286	0.94921	-0.075197	0.81818	0.95398	0.96114	-0.057186	0.58874	0.79245	1.018	0.025801	0.25714	0.48091	0.89976	-0.15239	1	1	0.9479	-0.077192	0.60952	0.79159	0.93614	-0.095203	0.17143	0.44493	0.88381	-0.17819
NEG	769.556	8.93	0.30952	0.73286	0.8762	-0.19066	0.81818	0.95398	1.0362	0.051295	0.58874	0.79245	0.93754	-0.093049	0.25714	0.48091	0.76234	-0.3915	0.25714	0.48625	0.87004	-0.20084	0.11429	0.33848	0.73571	-0.4428	0.35238	0.62271	0.81313	-0.29845
NEG	207.931	0.15	0.30952	0.73286	0.94589	-0.08025	0.81818	0.95398	0.9941	-0.0085382	0.69913	0.86627	1.0171	0.024407	0.35238	0.57216	0.97241	-0.040363	0.47619	0.67517	1.028	0.039887	0.47619	0.68896	0.97818	-0.031825	0.35238	0.62271	0.9561	-0.064771
NEG	734.544	8.18	0.30952	0.73286	0.8713	-0.19875	0.81818	0.95398	0.95324	-0.06909	0.93723	0.96622	1.0243	0.034649	0.17143	0.38396	0.81855	-0.28886	0.47619	0.67517	0.93945	-0.09011	0.35238	0.58501	0.8587	-0.21977	0.35238	0.62271	0.79912	-0.32351
NEG	845.476	7.99	0.30952	0.73286	1.0592	0.08293	0.81818	0.95398	0.99847	-0.002203	0.93723	0.96622	1.0223	0.03182	0.7619	0.8687	1.0415	0.058725	0.7619	0.86812	0.98336	-0.024206	0.91429	0.9666	1.0431	0.060928	1	1	1.0188	0.026905
NEG	988.545	8.7	0.30952	0.73286	1.0704	0.098215	0.93723	0.98595	1.0224	0.032009	0.064935	0.21107	1.0812	0.1126	0.7619	0.8687	1.0289	0.041145	0.7619	0.86812	0.96121	-0.05707	1	1	1.0064	0.0091361	0.60952	0.82434	0.95168	-0.071451
NEG	228.903	12.14	0.30952	0.73286	1.0618	0.086578	0.93723	0.98595	1.0388	0.054907	0.17965	0.41666	1.1151	0.15712	0.066667	0.21465	1.0976	0.13432	0.60952	0.77155	1.0336	0.047745	0.47619	0.68896	1.0566	0.079415	0.91429	0.97692	0.98432	-0.022794
NEG	830.591	9.37	0.30952	0.73286	0.8603	-0.21709	0.93723	0.98595	0.91822	-0.12309	0.17965	0.41666	0.78871	-0.34244	0.17143	0.38396	0.7494	-0.4162	0.47619	0.67517	0.87109	-0.19911	0.35238	0.58501	0.81614	-0.29311	0.47619	0.72996	0.95015	-0.073765
NEG	101.025	0.34	0.30952	0.73286	0.91471	-0.12861	0.93723	0.98595	1.0374	0.053024	0.39394	0.66372	0.92221	-0.11684	1	1	1.019	0.027157	0.25714	0.48625	1.114	0.15577	0.91429	0.9666	0.98223	-0.025867	0.47619	0.72996	1.105	0.14399
NEG	613.406	6.91	0.30952	0.73286	0.82363	-0.27992	0.93723	0.98595	0.95276	-0.06982	0.39394	0.66372	0.82089	-0.28473	0.11429	0.30644	1.4769	0.56253	0.038095	0.15643	1.7931	0.84245	0.17143	0.4122	1.5501	0.63235	0.0095238	0.088959	1.7991	0.84726
NEG	158.976	12.19	0.30952	0.73286	0.96395	-0.052977	0.93723	0.98595	1.0082	0.011782	0.58874	0.79245	1.0191	0.027341	0.35238	0.57216	1.0397	0.056226	0.038095	0.15643	1.0786	0.1092	0.47619	0.68896	1.0313	0.044444	0.47619	0.72996	1.0202	0.028885
NEG	590.904	12.03	0.30952	0.73286	0.94036	-0.088709	0.93723	0.98595	1.0019	0.0027596	0.69913	0.86627	1.0515	0.072426	0.60952	0.77559	1.0293	0.041724	0.25714	0.48625	1.0946	0.13043	0.60952	0.79159	1.0274	0.038964	0.7619	0.90703	0.97894	-0.030702
NEG	624.337	3.76	0.30952	0.73286	1.3502	0.43322	0.93723	0.98595	0.85135	-0.23218	0.69913	0.86627	0.86768	-0.20477	0.25714	0.48091	1.9578	0.96926	0.7619	0.86812	1.45	0.53604	0.11429	0.33848	2.2997	1.2014	0.17143	0.44493	2.2564	1.174
NEG	856.605	10.01	0.30952	0.73286	0.82714	-0.2738	0.93723	0.98595	1.1738	0.23114	0.81818	0.92235	0.99286	-0.010341	0.60952	0.77559	1.2988	0.37714	0.47619	0.67517	1.5702	0.65094	0.7619	0.88776	1.1065	0.146	0.60952	0.82434	1.3081	0.38748
NEG	1176.82	12.04	0.30952	0.73286	0.92959	-0.10534	0.93723	0.98595	0.98655	-0.019532	0.81818	0.92235	0.98346	-0.024066	0.91429	0.96003	1.0648	0.090613	0.25714	0.48625	1.1455	0.19595	0.91429	0.9666	1.0793	0.11015	0.7619	0.90703	1.0827	0.11468
NEG	609.557	9.74	0.30952	0.73286	0.96927	-0.045034	0.93723	0.98595	0.99269	-0.010581	1	1	1.006	0.0086327	0.60952	0.77559	1.0362	0.051248	0.25714	0.48625	1.069	0.096282	0.17143	0.4122	1.0438	0.061829	0.25714	0.51611	1.03	0.042615
NEG	295.825	12.25	0.30952	0.73286	0.92057	-0.1194	1	1	0.99757	-0.0035106	0.093074	0.26863	0.90668	-0.14134	0.60952	0.77559	1.0208	0.029715	0.17143	0.3965	1.1089	0.14911	0.7619	0.88776	1.0233	0.033226	0.11429	0.3578	1.1259	0.17105
NEG	810.974	0.35	0.30952	0.73286	1.1014	0.13934	1	1	1.0012	0.0017559	0.30952	0.5757	1.0806	0.11179	0.019048	0.093317	0.68138	-0.55347	0.0095238	0.077098	0.61865	-0.69281	0.019048	0.11993	0.68055	-0.55523	0.019048	0.12901	0.63057	-0.66526
NEG	872.475	8.49	0.30952	0.73286	0.92199	-0.11718	1	1	1.0113	0.016204	0.30952	0.5757	0.8487	-0.23667	1	1	0.95067	-0.072978	1	1	1.0311	0.044199	1	1	0.94006	-0.089182	1	1	1.1202	0.16369
NEG	850.561	8.62	0.30952	0.73286	1.12	0.1635	1	1	0.98546	-0.021129	0.39394	0.66372	1.1013	0.13922	0.17143	0.38396	1.3685	0.45259	0.25714	0.48625	1.2219	0.28909	0.17143	0.4122	1.3887	0.47372	0.25714	0.51611	1.2426	0.31337
NEG	217.862	12.89	0.30952	0.73286	0.96058	-0.058024	1	1	0.99548	-0.0065392	0.81818	0.92235	1.0163	0.023348	0.91429	0.96003	1.0058	0.0082876	0.7619	0.86812	1.047	0.066311	0.91429	0.9666	1.0103	0.014827	0.7619	0.90703	0.98961	-0.015061
NEG	1056.78	12.04	0.30952	0.73286	0.89603	-0.15839	1	1	1.0201	0.02878	0.81818	0.92235	1.056	0.078622	0.91429	0.96003	0.99202	-0.011556	0.35238	0.57325	1.1071	0.14683	0.60952	0.79159	0.97243	-0.040336	0.47619	0.72996	0.93941	-0.090178
NEG	124.008	0.34	0.30952	0.73286	0.80889	-0.30599	1	1	0.96219	-0.055609	1	1	1.0942	0.12993	0.35238	0.57216	0.73148	-0.45111	0.47619	0.67517	0.9043	-0.14512	0.25714	0.49172	0.76022	-0.3955	0.60952	0.82434	0.66848	-0.58105
NEG	212.844	0.32	0.39394	0.80299	1.2142	0.28002	0.0021645	0.073593	1.4588	0.54474	0.0021645	0.025377	1.5977	0.67601	0.25714	0.48091	0.74064	-0.43316	0.066667	0.22266	0.60997	-0.71318	0.0095238	0.10513	0.50772	-0.9779	0.0095238	0.088959	0.46356	-1.1092
NEG	517.871	0.38	0.39394	0.80299	1.0973	0.13397	0.0021645	0.073593	1.3425	0.42498	0.008658	0.05492	1.4364	0.5225	0.91429	0.96003	1.0004	0.00052672	0.60952	0.77155	0.91165	-0.13345	0.11429	0.33848	0.74512	-0.42445	0.038095	0.18772	0.69642	-0.52197
NEG	644.112	0.38	0.39394	0.80299	0.82859	-0.27127	0.0021645	0.073593	0.48715	-1.0376	0.008658	0.05492	0.50294	-0.99155	0.17143	0.38396	0.69594	-0.52297	0.60952	0.77155	0.83991	-0.25169	0.25714	0.49172	1.4286	0.5146	0.35238	0.62271	1.3837	0.46858
NEG	293.088	0.38	0.39394	0.80299	0.924	-0.11404	0.004329	0.082689	0.62686	-0.67378	0.008658	0.05492	0.65879	-0.60211	0.60952	0.77559	1.0532	0.074813	0.47619	0.67517	1.1399	0.18885	0.11429	0.33848	1.6801	0.74859	0.17143	0.44493	1.5987	0.67692
NEG	314.068	0.38	0.39394	0.80299	0.95088	-0.072657	0.004329	0.082689	0.8245	-0.27841	0.008658	0.05492	0.84957	-0.23519	0.25714	0.48091	0.88298	-0.17955	0.47619	0.67517	0.92859	-0.10689	0.7619	0.88776	1.0709	0.098862	0.91429	0.97692	1.0393	0.055641
NEG	605.155	0.38	0.39394	0.80299	0.8748	-0.19297	0.004329	0.082689	0.62229	-0.68434	0.008658	0.05492	0.64308	-0.63693	0.7619	0.8687	0.86625	-0.20715	0.7619	0.86812	0.99022	-0.014179	0.25714	0.49172	1.392	0.47719	0.25714	0.51611	1.347	0.42979
NEG	739.988	0.41	0.39394	0.80299	1.0558	0.078316	0.004329	0.082689	0.84261	-0.24706	0.093074	0.26863	0.85999	-0.21761	1	1	0.96879	-0.045742	0.47619	0.67517	0.9176	-0.12406	0.25714	0.49172	1.1497	0.20132	0.47619	0.72996	1.1265	0.17186
NEG	566.336	5.1	0.39394	0.80299	1.1327	0.17971	0.008658	0.1141	0.66569	-0.58707	0.0021645	0.025377	0.57899	-0.7884	0.0095238	0.060188	0.18485	-2.4356	0.0095238	0.077098	0.1632	-2.6153	0.0095238	0.10513	0.27767	-1.8485	0.0095238	0.088959	0.31926	-1.6472
NEG	566.346	5.5	0.39394	0.80299	0.8807	-0.18328	0.008658	0.1141	0.67928	-0.55791	0.0021645	0.025377	0.57307	-0.80321	0.0095238	0.060188	0.16013	-2.6427	0.0095238	0.077098	0.18182	-2.4594	0.019048	0.11993	0.23573	-2.0848	0.0095238	0.088959	0.27942	-1.8395
NEG	979.167	0.38	0.39394	0.80299	0.7835	-0.352	0.008658	0.1141	0.45751	-1.1281	0.015152	0.079011	0.49376	-1.0181	0.17143	0.38396	0.58786	-0.76647	0.17143	0.3965	0.7503	-0.41447	0.25714	0.49172	1.2849	0.36166	0.25714	0.51611	1.1906	0.25166
NEG	373.999	0.35	0.39394	0.80299	0.93874	-0.091199	0.008658	0.1141	0.76421	-0.38795	0.041126	0.15468	0.77407	-0.36946	0.066667	0.21465	0.72991	-0.45421	0.11429	0.31236	0.77754	-0.36301	0.7619	0.88776	0.95511	-0.066255	1	1	0.94295	-0.084749
NEG	567.349	5.5	0.39394	0.80299	0.87175	-0.19801	0.015152	0.14803	0.67518	-0.56666	0.0021645	0.025377	0.56693	-0.81876	0.0095238	0.060188	0.15501	-2.6896	0.0095238	0.077098	0.17782	-2.4915	0.019048	0.11993	0.22959	-2.1229	0.0095238	0.088959	0.27342	-1.8708
NEG	308.909	0.29	0.39394	0.80299	1.0661	0.092339	0.015152	0.14803	1.1846	0.2444	0.025974	0.11236	1.2392	0.3094	0.066667	0.21465	0.81869	-0.28862	0.038095	0.15643	0.76793	-0.38096	0.0095238	0.10513	0.69111	-0.53302	0.019048	0.12901	0.66066	-0.59802
NEG	344.998	0.45	0.39394	0.80299	0.97857	-0.03126	0.015152	0.14803	0.90932	-0.13714	0.093074	0.26863	0.95471	-0.066872	0.35238	0.57216	1.0073	0.010423	0.35238	0.57325	1.0293	0.041683	0.17143	0.4122	1.1077	0.14756	0.35238	0.62271	1.055	0.077296
NEG	1089.7	5.49	0.39394	0.80299	0.75482	-0.40579	0.025974	0.18553	0.50847	-0.97576	0.0021645	0.025377	0.36027	-1.4729	0.0095238	0.060188	0.065438	-3.9337	0.0095238	0.077098	0.086693	-3.5279	0.0095238	0.10513	0.1287	-2.958	0.0095238	0.088959	0.18164	-2.4609
NEG	556.319	5.51	0.39394	0.80299	0.89006	-0.16803	0.041126	0.23619	0.69856	-0.51755	0.004329	0.037357	0.58792	-0.7663	0.0095238	0.060188	0.18435	-2.4394	0.0095238	0.077098	0.20713	-2.2714	0.0095238	0.10513	0.26391	-1.9219	0.0095238	0.088959	0.31357	-1.6731
NEG	108.903	0.33	0.39394	0.80299	1.0274	0.038951	0.064935	0.3041	0.70304	-0.50832	0.025974	0.11236	0.72633	-0.46131	0.7619	0.8687	0.89888	-0.1538	0.25714	0.48625	0.87494	-0.19275	0.11429	0.33848	1.2786	0.35452	0.066667	0.26984	1.2376	0.30751
NEG	1023.13	0.36	0.39394	0.80299	1.0551	0.077446	0.064935	0.3041	0.68433	-0.54723	0.025974	0.11236	0.73755	-0.43918	0.17143	0.38396	0.71471	-0.48457	0.038095	0.15643	0.67735	-0.56202	1	1	1.0444	0.062662	1	1	0.96903	-0.045391
NEG	753.019	0.35	0.39394	0.80299	1.1891	0.24984	0.064935	0.3041	0.80742	-0.30862	0.81818	0.92235	0.95104	-0.072417	0.066667	0.21465	0.63508	-0.65498	0.0095238	0.077098	0.5341	-0.90482	0.17143	0.4122	0.78656	-0.34637	0.066667	0.26984	0.66777	-0.58257
NEG	937.524	8.49	0.39394	0.80299	1.0693	0.096629	0.093074	0.37317	1.1822	0.24149	0.30952	0.5757	1.1077	0.14755	0.7619	0.8687	1.274	0.34936	0.91429	0.95707	1.1915	0.25273	0.91429	0.9666	1.0776	0.10786	1	1	1.1501	0.20181
NEG	995.61	5.12	0.39394	0.80299	1.4051	0.4907	0.13203	0.45254	0.59556	-0.74769	0.004329	0.037357	0.36679	-1.447	0.0095238	0.060188	0.054066	-4.2091	0.0095238	0.077098	0.038477	-4.6998	0.0095238	0.10513	0.090782	-3.4615	0.0095238	0.088959	0.1474	-2.7622
NEG	669.264	12	0.39394	0.80299	0.86672	-0.20635	0.13203	0.45254	0.81095	-0.30231	0.008658	0.05492	0.69774	-0.51925	0.47619	0.67913	0.83788	-0.25519	1	1	0.96672	-0.048836	0.7619	0.88776	1.0332	0.047119	0.25714	0.51611	1.2008	0.26405
NEG	294.89	12.34	0.39394	0.80299	1.0523	0.073517	0.13203	0.45254	1.1196	0.16304	0.025974	0.11236	1.1306	0.17713	0.019048	0.093317	1.1602	0.21434	0.35238	0.57325	1.1025	0.14082	0.60952	0.79159	1.0362	0.051303	0.7619	0.90703	1.0261	0.037207
NEG	923.817	12.04	0.39394	0.80299	1.0582	0.08162	0.13203	0.45254	1.0805	0.11164	0.041126	0.15468	1.1586	0.21233	0.25714	0.48091	1.1026	0.14097	0.60952	0.77155	1.042	0.05935	0.60952	0.79159	1.0205	0.02933	0.47619	0.72996	0.95174	-0.07136
NEG	147.905	12.23	0.39394	0.80299	1.0293	0.041616	0.13203	0.45254	1.0725	0.10102	0.17965	0.41666	1.058	0.081351	0.47619	0.67913	1.036	0.051089	0.91429	0.95707	1.0066	0.0094734	0.47619	0.68896	0.96598	-0.049928	0.7619	0.90703	0.97924	-0.030262
NEG	279.162	5.68	0.39394	0.80299	0.91987	-0.12049	0.13203	0.45254	0.9764	-0.034454	0.93723	0.96622	0.85773	-0.2214	0.47619	0.67913	0.81728	-0.29109	0.7619	0.86812	0.88848	-0.17059	0.17143	0.4122	0.83704	-0.25664	0.60952	0.82434	0.95284	-0.069691
NEG	226.09	0.38	0.39394	0.80299	0.95558	-0.065552	0.17965	0.5396	0.89746	-0.15609	0.041126	0.15468	0.84064	-0.25044	0.47619	0.67913	0.93549	-0.0962	0.60952	0.77155	0.97898	-0.030648	0.91429	0.9666	1.0424	0.059889	0.91429	0.97692	1.1128	0.15424
NEG	533.29	11.98	0.39394	0.80299	0.82506	-0.27743	0.17965	0.5396	0.77555	-0.36671	0.041126	0.15468	0.66369	-0.59142	0.17143	0.38396	0.75628	-0.40301	0.91429	0.95707	0.91663	-0.12558	0.91429	0.9666	0.97515	-0.036304	0.35238	0.62271	1.1395	0.18841
NEG	673.875	12.05	0.39394	0.80299	1.0796	0.11055	0.17965	0.5396	1.1357	0.18362	0.064935	0.21107	1.1806	0.2395	0.60952	0.77559	1.0821	0.11386	0.91429	0.95707	1.0023	0.0033093	0.35238	0.58501	0.9528	-0.06976	0.25714	0.51611	0.91659	-0.12565
NEG	690.263	5.33	0.39394	0.80299	0.93718	-0.093598	0.17965	0.5396	0.8549	-0.22617	0.48485	0.73462	0.88854	-0.1705	0.0095238	0.060188	0.5719	-0.80617	0.0095238	0.077098	0.61023	-0.71257	0.019048	0.11993	0.66897	-0.58	0.019048	0.12901	0.64364	-0.63567
NEG	880.601	9.12	0.39394	0.80299	0.78455	-0.35006	0.17965	0.5396	0.70402	-0.50631	0.48485	0.73462	0.77726	-0.36352	0.60952	0.77559	1.117	0.15965	0.25714	0.48625	1.4238	0.50971	0.25714	0.49172	1.5866	0.66596	0.25714	0.51611	1.4371	0.52318
NEG	168.848	12.28	0.39394	0.80299	1.0625	0.087405	0.17965	0.5396	1.0894	0.1236	0.81818	0.92235	0.93831	-0.09186	0.91429	0.96003	1.0038	0.0055204	0.35238	0.57325	0.94482	-0.081885	0.17143	0.4122	0.92141	-0.11808	0.25714	0.51611	1.0698	0.09738
NEG	764.796	12.11	0.39394	0.80299	1.0643	0.089878	0.17965	0.5396	1.0505	0.071124	0.81818	0.92235	1.0346	0.049027	0.35238	0.57216	1.1387	0.18744	1	1	1.07	0.097558	0.7619	0.88776	1.084	0.11631	0.60952	0.82434	1.1007	0.13841
NEG	405.855	0.27	0.39394	0.80299	0.9292	-0.10594	0.17965	0.5396	0.92953	-0.10543	0.93723	0.96622	1.017	0.024284	0.7619	0.8687	0.98455	-0.022466	0.7619	0.86812	1.0596	0.083473	0.35238	0.58501	1.0592	0.082968	0.7619	0.90703	0.96811	-0.04675
NEG	783.834	12.05	0.39394	0.80299	1.0814	0.11286	0.17965	0.5396	1.1089	0.1491	0.93723	0.96622	0.99442	-0.0080705	0.7619	0.8687	1.0588	0.082483	0.7619	0.86812	0.97917	-0.030376	0.35238	0.58501	0.95487	-0.06662	0.25714	0.51611	1.0648	0.090554
NEG	1156.6	5.13	0.39394	0.80299	0.94767	-0.07755	0.24026	0.6051	0.72003	-0.47388	0.0021645	0.025377	0.52349	-0.93378	0.0095238	0.060188	0.23474	-2.0909	0.0095238	0.077098	0.2477	-2.0133	0.038095	0.17695	0.32601	-1.617	0.0095238	0.088959	0.44841	-1.1571
NEG	476.277	5.11	0.39394	0.80299	1.3317	0.41325	0.24026	0.6051	0.74703	-0.42076	0.025974	0.11236	0.59599	-0.74665	0.0095238	0.060188	0.16873	-2.5673	0.0095238	0.077098	0.1267	-2.9805	0.0095238	0.10513	0.22586	-2.1465	0.0095238	0.088959	0.2831	-1.8206
NEG	190.928	12.88	0.39394	0.80299	0.97169	-0.041437	0.24026	0.6051	1.061	0.08539	0.064935	0.21107	1.0811	0.11245	0.91429	0.96003	1.023	0.032833	0.35238	0.57325	1.0528	0.074271	0.60952	0.79159	0.96423	-0.052557	0.25714	0.51611	0.94631	-0.079615
NEG	616.36	5.56	0.39394	0.80299	1.3291	0.41042	0.24026	0.6051	0.73883	-0.43668	0.093074	0.26863	0.70268	-0.50907	0.0095238	0.060188	0.32578	-1.618	0.0095238	0.077098	0.24512	-2.0284	0.066667	0.25241	0.44094	-1.1813	0.0095238	0.088959	0.46363	-1.1089
NEG	724.014	0.41	0.39394	0.80299	1.1017	0.1397	0.24026	0.6051	1.0763	0.10615	0.093074	0.26863	1.179	0.2376	0.066667	0.21465	1.1115	0.15246	1	1	1.0089	0.012767	0.7619	0.88776	1.0326	0.046317	0.7619	0.90703	0.94269	-0.085138
NEG	770.306	5.5	0.39394	0.80299	0.90968	-0.13656	0.24026	0.6051	0.8531	-0.22922	0.093074	0.26863	0.83218	-0.26502	0.0095238	0.060188	0.43978	-1.1851	0.0095238	0.077098	0.48345	-1.0486	0.019048	0.11993	0.51551	-0.95592	0.019048	0.12901	0.52847	-0.92012
NEG	986.795	12.04	0.39394	0.80299	0.95968	-0.05938	0.24026	0.6051	0.9414	-0.087127	0.24026	0.49508	1.0407	0.057542	0.35238	0.57216	1.0819	0.11355	0.11429	0.31236	1.1273	0.17293	0.11429	0.33848	1.1492	0.20068	0.7619	0.90703	1.0396	0.05601
NEG	210.824	12.26	0.39394	0.80299	0.9549	-0.066579	0.24026	0.6051	1.0722	0.10054	0.58874	0.79245	1.0197	0.028079	0.7619	0.8687	0.98647	-0.019652	0.7619	0.86812	1.0331	0.046927	0.25714	0.49172	0.92007	-0.12019	0.7619	0.90703	0.96746	-0.047732
NEG	602.298	5.1	0.39394	0.80299	1.0877	0.12124	0.24026	0.6051	0.80671	-0.30988	0.58874	0.79245	0.91679	-0.12534	0.91429	0.96003	0.96154	-0.056575	1	1	0.88404	-0.17781	1	1	1.1919	0.2533	1	1	1.0488	0.068766
NEG	545.263	5.1	0.39394	0.80299	1.2229	0.2903	0.30952	0.67547	0.8238	-0.27963	0.025974	0.11236	0.70999	-0.49413	0.0095238	0.060188	0.37365	-1.4202	0.0095238	0.077098	0.30555	-1.7105	0.0095238	0.10513	0.45357	-1.1406	0.0095238	0.088959	0.52628	-0.9261
NEG	330.853	12.24	0.39394	0.80299	1.0561	0.0788	0.30952	0.67547	1.0715	0.099589	0.064935	0.21107	1.114	0.15573	1	1	0.99982	-0.00025347	0.35238	0.57325	0.94668	-0.079054	0.17143	0.4122	0.93313	-0.099843	0.066667	0.26984	0.89752	-0.15599
NEG	809.552	8.58	0.39394	0.80299	0.80566	-0.31176	0.30952	0.67547	0.7569	-0.40183	0.064935	0.21107	0.65921	-0.60119	0.019048	0.093317	0.56956	-0.81207	0.038095	0.15643	0.70695	-0.50031	0.066667	0.25241	0.7525	-0.41024	0.25714	0.51611	0.86401	-0.21088
NEG	1019.81	12.04	0.39394	0.80299	1.0615	0.086087	0.30952	0.67547	1.0669	0.093411	0.13203	0.34269	1.0815	0.11308	0.91429	0.96003	1.0108	0.015506	0.60952	0.77155	0.95225	-0.070582	0.35238	0.58501	0.94743	-0.077905	0.35238	0.62271	0.93461	-0.097571
NEG	531.219	3.66	0.39394	0.80299	0.82762	-0.27295	0.30952	0.67547	1.4896	0.57494	0.30952	0.5757	1.4456	0.53163	0.0095238	0.060188	3.1927	1.6748	0.019048	0.10445	3.8577	1.9477	0.11429	0.33848	2.1433	1.0998	0.066667	0.26984	2.2086	1.1431
NEG	988.799	12.04	0.39394	0.80299	1.0801	0.11119	0.30952	0.67547	1.0912	0.1259	0.39394	0.66372	1.0748	0.10409	0.47619	0.67913	1.0731	0.10172	1	1	0.99346	-0.009466	0.91429	0.9666	0.98338	-0.024179	0.91429	0.97692	0.99836	-0.0023665
NEG	884.526	8.5	0.39394	0.80299	0.91392	-0.12986	0.30952	0.67547	0.90459	-0.14466	0.58874	0.79245	0.96769	-0.047379	0.066667	0.21465	0.7383	-0.43772	0.11429	0.31236	0.80784	-0.30786	0.25714	0.49172	0.81617	-0.29306	0.17143	0.44493	0.76295	-0.39034
NEG	721.538	7.9	0.39394	0.80299	0.92671	-0.10981	0.30952	0.67547	1.2295	0.29806	0.81818	0.92235	1.0846	0.1172	0.47619	0.67913	0.90331	-0.14671	0.91429	0.95707	0.97475	-0.036891	0.25714	0.49172	0.7347	-0.44477	0.47619	0.72996	0.83283	-0.26391
NEG	1104.65	5.34	0.39394	0.80299	0.90298	-0.14723	0.39394	0.74	0.86906	-0.20247	0.064935	0.21107	0.81672	-0.29208	0.019048	0.093317	0.35683	-1.4867	0.038095	0.15643	0.39517	-1.3394	0.038095	0.17695	0.4106	-1.2842	0.11429	0.3578	0.43691	-1.1946
NEG	1191.76	12.05	0.39394	0.80299	1.1135	0.1551	0.39394	0.74	1.0451	0.063625	0.24026	0.49508	1.1069	0.14646	1	1	1.032	0.045491	0.7619	0.86812	0.92684	-0.10961	0.7619	0.88776	0.98751	-0.018134	0.47619	0.72996	0.9324	-0.10097
NEG	355.018	2.69	0.39394	0.80299	0.98504	-0.02175	0.39394	0.74	0.97919	-0.030343	0.39394	0.66372	0.98089	-0.027839	0.066667	0.21465	0.96071	-0.05782	0.17143	0.3965	0.97531	-0.03607	0.7619	0.88776	0.98113	-0.027477	0.35238	0.62271	0.97943	-0.029981
NEG	528.308	5.11	0.39394	0.80299	1.1594	0.21339	0.39394	0.74	0.92141	-0.11808	0.58874	0.79245	1.0304	0.0432	0.25714	0.48091	0.61967	-0.69042	0.11429	0.31236	0.53447	-0.90381	0.25714	0.49172	0.67253	-0.57234	0.11429	0.3578	0.60139	-0.73362
NEG	878.591	9.05	0.39394	0.80299	0.7288	-0.45641	0.39394	0.74	0.73253	-0.44904	0.58874	0.79245	0.83685	-0.25695	0.47619	0.67913	1.3065	0.38574	0.25714	0.48625	1.7927	0.84215	0.25714	0.49172	1.7836	0.83478	0.25714	0.51611	1.5612	0.64269
NEG	901.593	10.08	0.39394	0.80299	0.89013	-0.16791	0.39394	0.74	0.90379	-0.14594	0.58874	0.79245	0.92716	-0.1091	0.17143	0.38396	0.78418	-0.35074	0.25714	0.48625	0.88098	-0.18283	0.25714	0.49172	0.86766	-0.2048	0.25714	0.51611	0.84579	-0.24163
NEG	266.104	4.5	0.39394	0.80299	0.93668	-0.094369	0.39394	0.74	0.94532	-0.081123	1	1	0.98889	-0.016115	0.35238	0.57216	0.9311	-0.10299	0.91429	0.95707	0.99404	-0.008625	0.60952	0.79159	0.98495	-0.02187	0.47619	0.72996	0.94156	-0.086878
NEG	766.862	12.03	0.39394	0.80299	0.92095	-0.1188	0.48485	0.80492	0.93547	-0.096233	0.13203	0.34269	0.90802	-0.13921	0.35238	0.57216	0.91467	-0.12868	0.91429	0.95707	0.99317	-0.0098822	0.7619	0.88776	0.97776	-0.032449	0.7619	0.90703	1.0073	0.010526
NEG	381.231	7.96	0.39394	0.80299	1.0152	0.021762	0.48485	0.80492	1.1801	0.23894	0.24026	0.49508	1.0612	0.085693	0.11429	0.30644	1.2806	0.35686	0.066667	0.22266	1.2615	0.3351	0.25714	0.49172	1.0852	0.11792	0.11429	0.3578	1.2068	0.27117
NEG	362.94	12.04	0.39394	0.80299	1.003	0.0043176	0.48485	0.80492	1.052	0.073174	0.30952	0.5757	1.0931	0.12842	0.25714	0.48091	1.108	0.14797	0.91429	0.95707	1.1047	0.14366	0.47619	0.68896	1.0532	0.0748	0.60952	0.82434	1.0136	0.019551
NEG	966.566	9.4	0.39394	0.80299	0.92668	-0.10986	0.48485	0.80492	0.93298	-0.10009	0.48485	0.73462	0.94861	-0.076113	0.11429	0.30644	0.78901	-0.34189	0.25714	0.48625	0.85143	-0.23203	0.35238	0.58501	0.84569	-0.2418	0.25714	0.51611	0.83175	-0.26578
NEG	952.5	8.68	0.39394	0.80299	1.0533	0.074857	0.48485	0.80492	0.96173	-0.056292	0.58874	0.79245	1.057	0.080017	0.60952	0.77559	0.93882	-0.091084	0.17143	0.3965	0.89135	-0.16594	0.91429	0.9666	0.97617	-0.034791	0.11429	0.3578	0.88816	-0.1711
NEG	353.2	6.06	0.39394	0.80299	0.98115	-0.027455	0.48485	0.80492	1.1723	0.22937	0.69913	0.86627	1.0526	0.074021	0.25714	0.48091	1.351	0.43404	0.17143	0.3965	1.377	0.4615	0.25714	0.49172	1.1524	0.20467	0.35238	0.62271	1.2834	0.36002
NEG	119.945	12.14	0.39394	0.80299	0.95395	-0.068018	0.48485	0.80492	1.0197	0.028146	0.81818	0.92235	1.0164	0.023505	0.7619	0.8687	0.97432	-0.03754	1	1	1.0214	0.030478	0.25714	0.49172	0.95549	-0.065685	0.47619	0.72996	0.95857	-0.061045
[truncated: 2,815 more rows]

## Sheet: Supp. Table 3
Supplementary Table 3. A list of the notable metabolites (presented in KEGG ID format) and their related metabolic pathways present in the day 1 vs. pre-irradiation comparison.
[truncated: 20 more rows]

[truncated: 5 more sheets: Supp. Table 4, Supp. Table 5, Supp. Table 6, Supp. Table 7, Supp. Table 8]
